# Supplementary material for: A Comparative Study of Gene-Expression Data of Basal Cell Carcinoma and Melanoma Reveals New Insights about the Two Cancers
Source: PubMed Central journal article supplement (PMC3266277; doi:10.1371/journal.pone.0030750), 2012-01-25

Figure S3: Expression level changes of genes involved in the positive regulation of cell proliferation for two skin cancer types and seven non-skin cancer types. Each row represents expression changes of a gene across all the cancer types under study. Each column represents one cancer type. The fold change of gene expression is color-coded with red, white and green for up-, no and down-regulation.

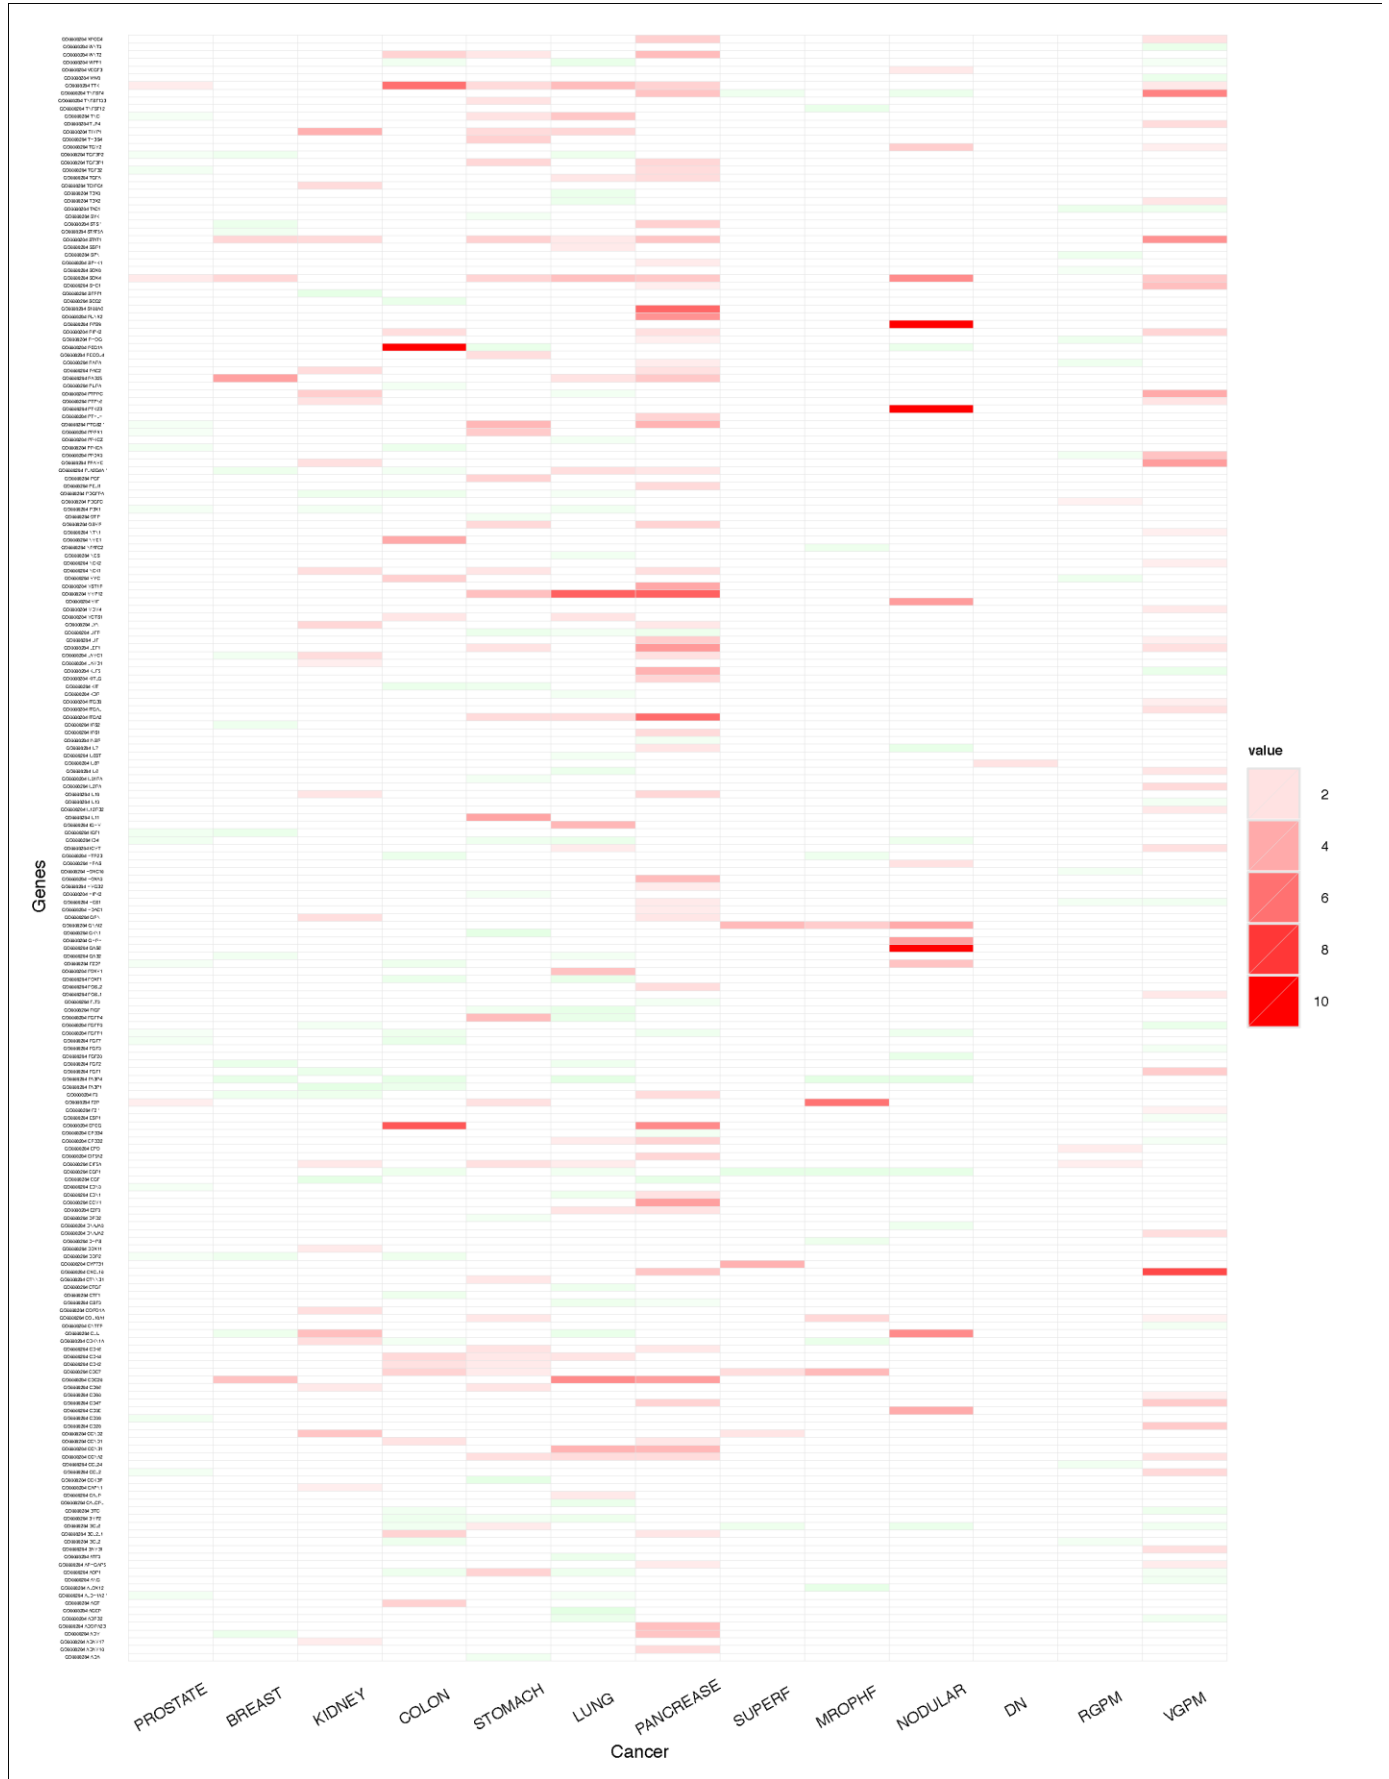

Supplement: pone.0030750.s003.pdf [file pone.0030750.s003.pdf]
