# Supplementary material for: A Comparative Study of Gene-Expression Data of Basal Cell Carcinoma and Melanoma Reveals New Insights about the Two Cancers
Source: PubMed Central journal article supplement (PMC3266277; doi:10.1371/journal.pone.0030750), 2012-01-25
Supplement: pone.0030750.s006.pdf [file pone.0030750.s006.pdf]

Table S1. Differentially expressed genes in skin cancer. (Each cell in the represents the ratio of tumor mean /control mean in the corresponding cancer type and gene.)

| genes    | BCC    |        |         | MELANOMA |      |      |
|----------|--------|--------|---------|----------|------|------|
|          | SUPERF | MROPHF | NODULAR | DN       | RGPM | VGPM |
| A4GNT    | 0.18   | 0.36   |         |          |      |      |
| AACS     |        | 0.23   |         |          |      |      |
| AASDHPPT | 3.7    |        |         |          |      | 1.5  |
| AATK     |        | 0.34   |         |          |      |      |
| ABCA7    |        |        |         | 1.69     |      |      |
| ABCB10   |        |        |         |          |      | 1.71 |
| ABCC4    |        |        |         |          |      | 2.71 |
| ABCC5    | 0.32   |        | 0.27    |          |      |      |
| ABCD3    |        |        | 0.36    |          |      |      |
| ABCG5    |        |        |         |          |      | 1.59 |
| ABHD4    |        |        |         |          | 0.65 |      |
| ABHD6    |        | 0.14   | 0.12    |          |      | 0.55 |
| ABI2     |        |        |         |          |      | 1.6  |
| ABL2     |        |        |         |          |      | 1.74 |
| ABLIM1   |        |        |         |          |      | 0.49 |
| ABLIM2   |        |        |         |          |      | 0.58 |
| ABTB1    |        |        |         |          |      | 1.57 |
| ACACB    |        |        |         |          | 1.57 |      |
| ACAD9    |        |        |         |          |      | 0.48 |
| ACADL    |        |        |         |          |      | 0.42 |
| ACADSB   |        |        | 0.34    |          |      | 0.5  |
| ACADVL   |        |        | 5.96    |          |      |      |
| ACBD6    | 0.6    |        |         |          |      |      |
| ACE      |        |        |         |          |      | 1.55 |
| ACLY     |        |        |         |          |      | 0.59 |
| ACOX2    |        | 0.22   | 0.22    |          |      |      |
| ACP2     |        |        |         |          |      | 1.91 |
| ACP5     |        |        |         |          |      | 1.93 |
| ACR      |        |        |         |          | 0.43 |      |
| ACSL3    |        |        |         |          |      | 4.46 |
| ACSL4    |        |        |         |          |      | 2.41 |
| ACSL5    |        | 0.23   | 0.29    |          |      |      |
| ACTG1    |        |        |         |          |      | 0.6  |
| ACTR1A   | 2.84   |        |         |          |      |      |
| ACTR1B   |        | 0.33   |         |          |      |      |
| ACTR3    |        |        |         |          |      | 2.7  |

|          |  |      |      |      |      |
|----------|--|------|------|------|------|
| ACYP2    |  |      |      |      | 1.74 |
| ADAM12   |  | 4.13 |      |      |      |
| ADAM22   |  |      |      |      | 0.6  |
| ADAM28   |  | 2.58 |      |      | 1.75 |
| ADAM30   |  |      |      |      | 0.51 |
| ADAM33   |  |      |      | 0.49 |      |
| ADAM9    |  | 1.87 |      |      |      |
| ADAMDEC1 |  |      |      |      | 3    |
| ADAMTS5  |  |      | 0.17 |      |      |
| ADAMTS6  |  | 1.64 |      |      | 1.62 |
| ADCY4    |  |      | 3.93 |      |      |
| ADD1     |  |      |      | 0.66 |      |
| ADH6     |  |      |      |      | 0.58 |
| ADIPOR1  |  |      |      | 0.51 |      |
| ADM2     |  |      | 4.77 |      |      |
| ADNP     |  |      | 4.03 |      |      |
| ADORA2A  |  |      |      | 0.64 |      |
| ADORA3   |  |      |      |      | 2.6  |
| ADRB2    |  |      |      |      | 0.52 |
| ADRB3    |  |      |      | 0.66 |      |
| ADSS     |  |      |      |      | 2.45 |
| AEBP1    |  |      | 5.67 |      |      |
| AFG3L1   |  | 0.52 |      |      | 2.25 |
| AGA      |  |      |      |      | 1.94 |
| AGPS     |  |      |      |      | 3.69 |
| AGTRL1   |  |      |      |      | 1.5  |
| AHI1     |  |      |      | 0.52 | 1.72 |
| AHSA1    |  |      |      |      | 2.06 |
| AHSG     |  |      | 4.16 |      |      |
| AIM2     |  |      |      |      | 3.55 |
| AK3L1    |  |      |      |      | 0.42 |
| AK5      |  |      |      |      | 1.63 |
| AKAP10   |  |      |      |      | 2.19 |
| AKR1C1   |  | 0.32 | 0.27 |      |      |
| AKR1C4   |  |      | 0.29 |      |      |
| AKR1D1   |  |      |      |      | 0.31 |
| AKR7A2   |  | 0.44 |      |      |      |
| AKT3     |  |      |      |      | 2.13 |
| ALDH2    |  |      |      |      | 0.43 |
| ALDOB    |  |      |      | 0.59 | 0.66 |
| ALDOC    |  |      | 0.49 |      |      |

|         |      |      |      |      |      |      |
|---------|------|------|------|------|------|------|
| ALG1    |      |      |      |      |      | 1.57 |
| ALG3    |      |      |      |      | 0.64 |      |
| ALG6    |      |      |      |      |      | 2.09 |
| ALOX12  |      | 0.18 |      |      |      |      |
| ALOX15B |      | 0.09 |      |      |      |      |
| ALPPL2  |      |      |      |      | 0.45 |      |
| ALS2CR2 |      |      |      |      |      | 2.39 |
| ALS2CR4 |      |      |      |      |      | 0.54 |
| AMOT    |      |      |      |      | 0.46 |      |
| AMOTL1  |      |      |      |      |      | 1.95 |
| AMOTL2  | 0.47 | 0.52 | 0.35 |      |      |      |
| ANAPC13 |      |      |      | 1.54 |      | 1.9  |
| ANAPC2  |      |      |      |      |      | 2.02 |
| ANG     |      |      |      |      |      | 0.54 |
| ANK2    |      |      |      |      | 0.28 |      |
| ANK3    |      |      | 0.17 |      |      | 0.43 |
| ANKMY1  |      |      |      |      | 1.53 | 1.73 |
| ANKRD10 |      |      |      |      |      | 1.82 |
| ANKRD12 |      | 2.41 |      |      |      | 0.53 |
| ANKRD28 |      |      |      |      |      | 1.71 |
| ANKRD5  |      |      |      |      |      | 1.63 |
| ANKRD6  |      |      |      |      |      | 1.63 |
| ANLN    |      |      | 3.93 |      |      |      |
| ANTXR1  |      | 5.34 |      |      |      |      |
| ANXA1   |      | 2.78 |      |      |      |      |
| ANXA3   |      |      |      | 1.52 |      |      |
| ANXA5   |      |      |      |      |      | 1.79 |
| ANXA7   |      |      | 0.45 |      |      |      |
| ANXA9   |      | 0.33 |      |      |      |      |
| AP1B1   |      |      |      |      |      | 1.52 |
| AP1S1   |      | 0.59 |      |      |      |      |
| AP2B1   |      |      |      |      |      | 1.88 |
| AP3D1   |      |      |      |      |      | 1.71 |
| AP3M2   |      |      |      |      |      | 1.54 |
| APBA3   |      |      |      |      |      | 0.59 |
| APC     |      | 2.13 |      |      |      |      |
| APC2    |      |      |      |      |      | 1.82 |
| APCS    |      |      |      |      |      | 0.58 |
| APEH    |      |      | 3.82 |      |      |      |
| APOC4   |      |      | 8.25 |      |      |      |
| APOD    |      | 0.14 | 0.11 |      |      |      |

|          |     |      |       |      |  |      |
|----------|-----|------|-------|------|--|------|
| APOL2    |     |      |       |      |  | 1.61 |
| APOL3    |     |      | 3.6   |      |  |      |
| APRIN    |     |      |       |      |  | 0.57 |
| APXL     |     |      |       | 0.49 |  |      |
| AQP1     |     |      |       |      |  | 0.61 |
| AQP2     |     |      |       | 0.6  |  |      |
| AQP5     |     |      |       | 0.45 |  | 0.53 |
| AQP9     |     |      | 0.12  |      |  |      |
| AR       |     |      |       |      |  | 0.29 |
| ARF1     |     |      |       |      |  | 0.59 |
| ARHGAP18 |     |      | 0.32  |      |  |      |
| ARHGAP22 |     |      |       |      |  | 1.5  |
| ARHGAP26 |     | 0.32 |       |      |  |      |
| ARHGAP5  |     |      |       |      |  | 1.66 |
| ARHGAP8  |     |      | 11.05 |      |  |      |
| ARHGDIG  |     |      | 1.78  |      |  |      |
| ARHGEF15 |     |      |       | 0.45 |  | 0.63 |
| ARHGEF4  |     |      |       |      |  | 0.51 |
| ARHGEF5  |     |      |       |      |  | 0.48 |
| ARHGEF9  |     |      |       |      |  | 1.65 |
| ARID1A   |     |      |       |      |  | 0.66 |
| ARIH2    |     |      | 1.97  |      |  |      |
| ARL1     |     |      |       | 0.6  |  | 2.64 |
| ARL4A    |     |      |       |      |  | 0.52 |
| ARL6     |     |      |       |      |  | 1.72 |
| ARL6IP4  |     |      | 6.93  |      |  |      |
| ARMC2    |     | 2.34 |       |      |  |      |
| ARMC5    |     |      | 4.93  |      |  |      |
| ARMC6    |     |      |       | 0.41 |  |      |
| ARMCX3   |     |      |       |      |  | 3.14 |
| ARPC2    |     |      | 4.6   |      |  |      |
| ARRDC2   | 3.6 |      | 4.86  |      |  |      |
| ARSB     |     |      |       |      |  | 1.91 |
| ARTN     |     |      |       |      |  | 1.5  |
| ARVCF    |     |      |       |      |  | 0.49 |
| ASAH1    |     |      |       |      |  | 3.99 |
| ASCC1    |     |      |       |      |  | 1.71 |
| ASCL2    |     |      | 7.39  |      |  | 0.49 |
| ASL      |     |      |       |      |  | 1.81 |
| ASMTL    |     |      |       |      |  | 1.5  |
| ASRGL1   |     |      |       | 1.74 |  | 2.18 |

|          |      |      |      |      |      |
|----------|------|------|------|------|------|
| ASS      |      | 0.63 |      |      |      |
| ASTN     |      |      |      |      | 0.64 |
| ASTN2    |      |      |      | 0.66 |      |
| ATF5     |      |      |      |      | 1.8  |
| ATM      |      |      |      |      | 2.47 |
| ATOX1    |      |      |      |      | 1.99 |
| ATP1A2   |      |      | 0.2  |      | 0.38 |
| ATP1B3   |      |      | 0.39 |      | 0.6  |
| ATP2A2   | 0.35 | 0.54 |      |      |      |
| ATP2B1   | 7.72 |      | 4.97 |      |      |
| ATP4B    |      |      |      | 0.59 |      |
| ATP5C1   |      |      |      |      | 2.26 |
| ATP5G3   |      | 0.44 |      |      |      |
| ATP5H    |      | 0.39 |      |      |      |
| ATP5L    | 0.33 | 0.31 |      |      |      |
| ATP6AP2  |      |      |      |      | 2.01 |
| ATP6V0E  |      |      |      |      | 2.17 |
| ATP6V1C1 |      |      |      |      | 2.41 |
| ATP6V1D  |      |      |      |      | 1.69 |
| ATP6V1G2 |      |      |      |      | 0.65 |
| ATP6V1H  |      |      |      |      | 2.68 |
| ATP8A1   |      |      |      |      | 1.63 |
| ATRX     |      |      |      |      | 1.93 |
| AVPI1    |      | 0.38 |      |      |      |
| AVPR2    |      |      |      |      | 1.59 |
| B3GNT1   |      |      |      | 0.5  |      |
| B4GALT3  |      | 0.45 | 0.42 |      |      |
| B4GALT5  |      |      |      | 1.85 |      |
| BAALC    |      |      |      |      | 2.62 |
| BAG1     |      | 0.45 |      |      |      |
| BAMBI    |      |      |      |      | 2.11 |
| BAP1     |      | 1.76 | 3.62 |      |      |
| BARX2    |      | 0.39 | 0.41 |      |      |
| BASP1    |      | 3.48 |      | 0.53 |      |
| BAT5     |      |      |      |      | 3.41 |
| BBOX1    |      |      |      |      | 0.48 |
| BCAN     |      |      |      |      | 1.64 |
| BCAP31   |      |      | 8.36 |      |      |
| BCAT1    |      |      |      |      | 2.19 |
| BCKDHA   |      | 0.3  |      |      |      |
| BCL11A   |      |      |      |      | 0.42 |

|         |       |       |      |      |      |      |
|---------|-------|-------|------|------|------|------|
| BCL2    |       |       |      |      | 0.56 |      |
| BCL2A1  |       |       |      |      |      | 4.53 |
| BCL6    | 0.4   |       | 0.31 |      |      | 0.48 |
| BCOR    |       |       |      | 2.02 |      |      |
| BCR     |       |       | 0.37 |      |      |      |
| BCS1L   | 0.5   | 0.55  |      |      |      |      |
| BDKRB1  |       |       |      |      |      | 0.45 |
| BECN1   |       |       |      | 1.65 |      | 2.09 |
| BET1    |       |       |      |      |      | 2.29 |
| BET1L   |       | 0.52  | 0.49 |      |      |      |
| BEX1    |       | 3.16  | 4.63 |      |      | 0.61 |
| BEX2    |       |       |      |      |      | 0.6  |
| BEXL1   |       |       |      |      |      | 1.61 |
| BFAR    |       |       |      |      |      | 1.95 |
| BGLAP   |       |       | 5.49 |      |      |      |
| BHLHB3  |       |       |      |      |      | 2.86 |
| BICD1   |       |       |      |      |      | 2.53 |
| BICD2   |       |       |      |      | 0.44 |      |
| BIN2    |       |       |      |      |      | 2.48 |
| BIRC2   |       |       |      |      |      | 2.76 |
| BLMH    |       |       |      |      |      | 0.58 |
| BLOC1S1 |       |       | 3.55 |      |      |      |
| BLVRB   |       | 0.48  |      |      |      |      |
| BMP1    |       |       |      |      |      | 1.5  |
| BMP2K   |       |       |      |      |      | 2.13 |
| BMP7    |       | 0.53  |      |      |      |      |
| BNC2    | 25.85 | 27.07 | 6.76 |      |      |      |
| BOLL    |       |       |      |      |      | 0.66 |
| BRD1    |       |       |      |      |      | 0.55 |
| BRD4    |       |       | 5.92 |      |      |      |
| BRD9    |       |       |      |      |      | 1.6  |
| BRDT    |       |       |      |      |      | 0.64 |
| BRIP1   |       |       |      |      |      | 2.14 |
| BRMS1L  |       |       |      |      |      | 1.66 |
| BRUNOL4 |       |       |      |      |      | 1.5  |
| BTBD14B |       |       |      |      | 0.54 | 1.5  |
| BTC     |       |       |      |      |      | 0.37 |
| BTG1    |       |       | 0.36 |      |      |      |
| BTG2    |       |       |      |      | 0.66 |      |
| BTG4    |       |       |      | 0.52 |      |      |
| BTN2A2  |       |       |      |      |      | 1.62 |

|           |      |      |      |      |      |      |
|-----------|------|------|------|------|------|------|
| BTN3A1    |      |      |      |      |      | 1.73 |
| BTN3A2    |      |      |      |      |      | 1.5  |
| BTNL3     |      | 4.6  |      |      |      |      |
| BTRC      |      | 0.41 |      |      |      |      |
| BUB1B     |      |      |      |      |      | 1.55 |
| BZRAP1    |      |      |      |      |      | 0.63 |
| C10orf11  |      |      |      |      |      | 1.51 |
| C10orf22  |      | 2.37 |      |      |      |      |
| C10orf27  |      |      |      | 0.5  |      |      |
| C10orf57  |      |      |      |      |      | 0.42 |
| C10orf65  |      |      |      |      |      | 2.02 |
| C11orf1   |      |      |      | 0.49 |      |      |
| C11orf11  |      |      | 0.55 |      |      |      |
| C11orf2   |      |      | 4.21 |      |      |      |
| C11orf9   |      |      |      | 0.39 | 0.48 |      |
| C12orf5   |      |      |      |      |      | 2.89 |
| C14orf10  |      |      |      |      |      | 1.87 |
| C14orf109 |      |      |      |      |      | 1.83 |
| C14orf112 | 0.57 | 0.52 |      |      |      |      |
| C14orf119 |      |      |      |      |      | 1.75 |
| C14orf122 |      |      | 2.08 |      |      |      |
| C14orf124 |      | 0.39 | 0.38 |      |      |      |
| C14orf132 |      |      |      | 0.42 | 0.43 |      |
| C14orf133 |      |      |      | 0.64 |      |      |
| C14orf138 |      |      |      |      |      | 1.82 |
| C14orf142 |      |      |      |      |      | 2.85 |
| C14orf149 |      |      |      |      |      | 1.62 |
| C14orf151 |      |      |      |      |      | 1.73 |
| C14orf155 |      |      |      |      |      | 0.39 |
| C14orf156 |      | 0.31 |      |      |      |      |
| C14orf173 |      |      | 2.72 |      |      |      |
| C14orf21  |      |      | 2.77 |      |      |      |
| C14orf37  |      |      |      |      |      | 1.53 |
| C15orf20  |      |      |      |      |      | 2.12 |
| C15orf24  |      |      |      |      |      | 1.61 |
| C16orf33  |      |      | 1.75 |      |      |      |
| C17orf37  |      | 0.59 |      |      |      |      |
| C18orf10  |      |      |      | 0.55 |      |      |
| C19orf26  |      |      | 4.41 |      |      |      |
| C19orf33  |      |      | 5.41 |      |      |      |
| C1orf19   |      |      |      |      |      | 2.18 |

|           |      |       |      |      |      |      |
|-----------|------|-------|------|------|------|------|
| C1orf25   |      |       |      |      |      | 1.7  |
| C1orf33   | 0.41 |       |      |      |      |      |
| C1orf35   |      | 0.64  |      |      |      |      |
| C1orf38   |      |       |      |      |      | 2.66 |
| C1QA      |      |       |      |      |      | 6.43 |
| C1QTNF2   |      |       |      |      |      | 0.6  |
| C1QTNF6   |      | 2.54  |      |      |      | 1.94 |
| C2        |      |       |      |      | 0.24 |      |
| C20orf100 |      |       |      |      | 0.42 |      |
| C20orf103 | 3    | 22.83 |      |      |      |      |
| C20orf108 |      |       |      |      |      | 1.69 |
| C20orf11  |      |       |      |      |      | 0.62 |
| C20orf116 |      | 0.54  | 0.47 |      |      |      |
| C20orf24  |      |       |      | 1.51 |      | 1.72 |
| C20orf30  |      |       |      |      |      | 2.41 |
| C20orf4   |      | 0.56  |      |      |      |      |
| C20orf42  |      |       |      |      |      | 0.46 |
| C20orf43  |      |       | 1.88 |      |      |      |
| C20orf6   |      | 4.3   |      |      |      |      |
| C20orf77  |      |       |      |      | 1.52 | 2.53 |
| C21orf25  |      |       | 0.28 |      |      |      |
| C21orf45  |      |       |      |      | 0.63 |      |
| C21orf55  |      |       |      |      |      | 1.54 |
| C21orf56  |      |       | 2.64 |      |      |      |
| C21orf63  |      | 0.35  | 0.42 |      |      |      |
| C21orf91  |      |       |      |      |      | 1.67 |
| C2orf16   |      |       |      |      | 1.53 | 1.91 |
| C2orf27   |      |       |      |      |      | 3.98 |
| C2orf30   |      |       |      |      |      | 3.29 |
| C2orf7    |      | 0.35  | 0.37 |      |      |      |
| C3AR1     |      |       |      |      |      | 2.88 |
| C3orf1    |      |       |      |      |      | 1.63 |
| C4orf15   |      | 2.82  | 3.05 |      |      |      |
| C4orf8    |      | 0.54  |      |      |      |      |
| C5orf13   |      |       | 3.04 |      |      |      |
| C5orf5    |      |       |      |      |      | 1.5  |
| C6orf105  |      |       | 0.16 |      |      | 0.5  |
| C6orf117  |      |       |      |      |      | 0.51 |
| C6orf129  |      |       |      |      |      | 2.08 |
| C6orf130  |      |       |      |      | 0.63 |      |
| C6orf149  |      |       |      |      | 0.47 |      |



|          |     |      |      |      |      |
|----------|-----|------|------|------|------|
| C6orf15  |     | 6.09 |      |      |      |
| C6orf203 |     |      |      | 1.96 | 2.13 |
| C6orf208 |     |      |      |      | 1.5  |
| C6orf27  |     |      |      | 0.38 |      |
| C6orf48  |     | 1.8  |      |      |      |
| C6orf51  |     |      |      |      | 1.82 |
| C6orf62  |     |      | 4.44 |      | 2.01 |
| C6orf85  |     |      |      | 0.3  |      |
| C7orf20  |     | 0.33 | 0.36 |      | 2.03 |
| C7orf25  |     |      |      |      | 2.11 |
| C7orf26  |     |      |      |      | 1.59 |
| C7orf31  |     |      | 0.4  |      |      |
| C7orf36  |     |      |      |      | 1.84 |
| C9orf125 |     |      |      | 0.55 | 0.52 |
| C9orf156 |     |      |      |      | 1.62 |
| C9orf25  |     |      |      | 0.48 |      |
| C9orf58  |     | 0.27 | 0.28 |      |      |
| C9orf84  |     |      |      |      | 0.53 |
| C9orf88  |     |      |      | 0.44 |      |
| C9orf9   |     |      |      | 0.66 | 0.58 |
| CA12     |     |      |      |      | 0.52 |
| CA2      |     |      |      | 2.09 |      |
| CABLES2  |     |      | 2.64 |      |      |
| CACNA1A  |     |      |      |      | 1.5  |
| CACNB3   |     |      |      | 0.38 |      |
| CACNB4   |     |      | 0.32 |      |      |
| CALCB    | 3.6 |      |      |      |      |
| CALD1    |     | 3.91 | 2.49 |      |      |
| CALU     |     | 3.33 |      |      |      |
| CAMK2G   |     |      | 1.83 |      | 0.61 |
| CAMLG    |     |      |      |      | 0.64 |
| CAMTA2   |     |      | 0.42 |      |      |
| CAPN10   |     | 0.59 |      |      |      |
| CAPN6    |     |      |      | 0.57 |      |
| CAPZA1   |     |      |      |      | 0.64 |
| CARD12   |     |      |      |      | 1.8  |
| CARD15   |     |      | 0.15 |      |      |
| CARD9    |     |      |      |      | 1.78 |
| CASC3    |     |      |      |      | 0.53 |
| CASP2    |     |      |      | 1.5  |      |
| CASQ2    |     | 0.28 | 0.26 |      |      |

|          |      |      |      |      |      |      |
|----------|------|------|------|------|------|------|
| CATSPER1 |      |      |      |      |      | 2.82 |
| CATSPER2 |      |      |      |      | 0.66 |      |
| CBFA2T2  |      |      |      |      | 0.58 |      |
| CBFB     |      |      |      |      |      | 1.67 |
| CBLB     |      |      |      |      |      | 1.74 |
| CBX3     |      |      |      |      |      | 2.56 |
| CBX5     |      |      |      |      |      | 2.27 |
| CCDC3    |      |      |      |      |      | 0.32 |
| CCDC5    |      |      |      |      |      | 2.14 |
| CCL13    |      |      |      |      |      | 2.48 |
| CCL18    |      |      |      |      |      | 5.75 |
| CCL2     |      |      |      |      |      | 2.34 |
| CCL20    |      |      |      | 3.17 |      |      |
| CCL24    |      |      |      |      | 0.49 |      |
| CCL27    |      |      |      |      |      | 0.25 |
| CCL8     |      |      |      |      |      | 2.14 |
| CCNA2    |      |      |      |      |      | 2.03 |
| CCND2    | 1.89 |      |      |      |      |      |
| CCNF     | 2.91 |      |      |      |      |      |
| CCNH     |      |      |      |      |      | 1.59 |
| CCPG1    |      |      |      |      |      | 4.38 |
| CCR1     |      |      |      |      |      | 2.07 |
| CCR2     |      |      |      | 2.09 |      | 2.7  |
| CCR5     |      |      |      |      |      | 2.02 |
| CCR6     |      |      |      |      |      | 0.39 |
| CCRL2    |      |      |      |      |      | 3.06 |
| CCT4     |      | 2.03 |      |      |      |      |
| CCT6A    |      |      |      |      |      | 2.29 |
| CD160    |      | 0.24 |      |      |      |      |
| CD164    |      |      |      |      |      | 1.71 |
| CD1A     |      | 0.12 | 0.22 |      |      | 0.42 |
| CD1C     |      |      |      | 1.88 |      |      |
| CD1D     |      |      |      |      |      | 1.84 |
| CD1E     |      |      |      | 1.84 |      |      |
| CD207    |      |      | 0.15 |      |      |      |
| CD209    |      |      |      |      |      | 1.6  |
| CD28     |      |      |      |      |      | 2.81 |
| CD34     |      |      |      |      |      | 0.43 |
| CD36     |      |      |      |      |      | 4.08 |
| CD3E     |      |      | 3.95 |      |      |      |
| CD4      |      |      |      |      | 0.44 |      |

|          |      |      |      |      |      |      |
|----------|------|------|------|------|------|------|
| CD47     |      |      |      |      |      | 2.83 |
| CD48     |      |      |      |      |      | 3.09 |
| CD53     |      |      |      |      |      | 5.6  |
| CD58     |      |      |      |      |      | 3.27 |
| CD59     |      |      | 0.47 |      |      |      |
| CD63     |      |      |      |      |      | 0.64 |
| CD68     | 2.16 | 3.18 | 1.79 |      |      | 2.99 |
| CD80     |      |      |      |      |      | 1.56 |
| CD83     |      |      |      |      |      | 2.86 |
| CD8A     |      |      |      |      |      | 2.44 |
| CD9      |      | 0.24 |      | 1.72 |      |      |
| CD96     |      |      |      |      |      | 1.88 |
| CDC16    |      |      |      |      |      | 2.45 |
| CDC23    |      |      |      |      |      | 2.21 |
| CDC25A   |      |      |      |      | 1.54 | 1.52 |
| CDC2L5   |      |      |      |      |      | 1.54 |
| CDC40    |      |      |      | 1.81 |      | 1.55 |
| CDC42BPA |      |      |      |      |      | 2.16 |
| CDC42EP1 |      |      |      |      | 0.57 |      |
| CDC42EP4 |      |      |      |      | 0.48 |      |
| CDC42SE2 |      |      |      |      |      | 1.99 |
| CDC45L   |      |      | 1.74 |      |      |      |
| CDC6     |      |      |      |      |      | 2.21 |
| CDC7     | 2.18 | 3.43 |      |      |      |      |
| CDCA1    |      | 4.01 |      |      |      | 3.97 |
| CDCA3    |      |      |      |      |      | 1.5  |
| CDH22    |      |      |      |      | 0.4  | 0.46 |
| CDIPT    |      | 0.29 |      |      |      |      |
| CDK2AP1  |      |      |      |      |      | 1.82 |
| CDK5R2   |      |      |      |      | 0.35 |      |
| CDK5RAP1 |      |      |      |      |      | 1.6  |
| CDK7     |      |      |      |      |      | 1.5  |
| CDK9     |      |      |      |      | 1.5  |      |
| CDKN1A   |      | 0.29 |      |      |      |      |
| CDO1     |      |      |      |      | 0.42 |      |
| CDON     |      |      |      |      | 1.68 |      |
| CEACAM6  |      |      |      |      | 0.46 |      |
| CEBPB    |      |      |      |      |      | 0.59 |
| CECR2    |      | 0.31 |      |      |      |      |
| CENTA1   |      |      |      |      |      | 1.52 |
| CENTD2   |      |      |      |      |      | 1.55 |

|         |       |      |       |      |      |      |
|---------|-------|------|-------|------|------|------|
| CER1    |       | 0.32 |       |      |      |      |
| CFLAR   |       |      |       |      |      | 2.09 |
| CGRRF1  |       |      |       |      |      | 2.13 |
| CHCHD2  |       |      |       |      |      | 0.62 |
| CHCHD3  |       |      |       |      |      | 2.58 |
| CHD1L   |       |      |       |      |      | 2.21 |
| CHD4    |       |      | 0.38  |      |      |      |
| CHD9    |       | 2.45 |       |      | 0.27 |      |
| CHEK1   |       |      |       |      |      | 2.03 |
| CHGA    | 25.94 | 18.7 | 29.97 |      |      |      |
| CHRD    | 2.15  |      |       |      |      |      |
| CHRNA3  |       |      | 0.37  |      |      |      |
| CHRND   |       |      |       |      |      | 1.68 |
| CHST11  |       |      |       |      |      | 4.26 |
| CHST2   | 2.7   | 2.79 |       |      |      | 1.75 |
| CHST6   |       | 0.34 |       |      | 1.58 | 3.32 |
| CIAS1   |       |      |       |      |      | 1.94 |
| CITED1  |       |      |       |      |      | 1.65 |
| CITED2  |       | 0.47 |       |      |      |      |
| CKLF    |       |      |       |      |      | 1.99 |
| CKS2    |       |      |       |      |      | 1.67 |
| CLCN3   |       |      |       |      |      | 1.79 |
| CLCN5   |       |      |       |      |      | 1.84 |
| CLDN18  |       | 3.24 |       |      |      |      |
| CLDN5   |       |      |       |      |      | 0.54 |
| CLDN7   |       | 2.27 | 3.38  |      |      |      |
| CLIC4   | 2.68  | 3.75 | 2.39  |      |      | 2.33 |
| CLK3    |       |      | 5.49  |      |      |      |
| CLPTM1  | 0.53  | 0.41 | 0.39  |      |      |      |
| CLTCL1  |       |      | 0.23  |      |      |      |
| CLU     |       |      | 5.08  |      |      |      |
| CMAS    |       |      |       |      |      | 2.15 |
| CNN3    |       |      |       |      |      | 3.64 |
| CNOT3   |       |      | 4.62  |      |      |      |
| CNOT7   |       |      |       | 1.53 |      |      |
| CNP     |       |      | 3.06  |      |      |      |
| CNTFR   |       |      |       |      |      | 0.61 |
| COBL    |       | 0.26 | 0.2   |      |      |      |
| COCH    |       | 0.1  | 0.08  |      |      |      |
| COG8    |       |      |       |      |      | 1.77 |
| COL17A1 |       |      |       |      |      | 0.37 |

|         |      |       |      |      |      |      |
|---------|------|-------|------|------|------|------|
| COL18A1 |      | 2.34  |      |      |      | 1.52 |
| COL21A1 |      |       |      |      |      | 0.53 |
| COL3A1  |      | 10.18 |      |      |      |      |
| COL4A1  |      | 7.77  | 4.2  |      |      | 1.8  |
| COL4A5  |      |       |      |      |      | 1.5  |
| COL4A6  |      |       |      |      |      | 0.5  |
| COL5A2  |      |       |      |      |      | 2.59 |
| COL5A3  |      | 2.33  |      |      |      |      |
| COL6A1  |      | 6.24  |      |      |      |      |
| COL6A3  | 4.97 |       |      |      | 0.57 |      |
| COL9A2  |      |       | 2.57 |      |      |      |
| COLEC12 |      |       | 0.3  |      |      |      |
| COMMMD1 |      |       | 0.42 |      |      |      |
| COPA    |      |       |      |      |      | 1.56 |
| COPS8   |      |       |      |      |      | 2.22 |
| COQ3    |      |       |      |      |      | 1.97 |
| COQ6    |      |       |      |      |      | 1.57 |
| CORO2B  |      |       |      |      | 0.51 |      |
| CORT    |      |       | 6.09 |      |      |      |
| COTL1   |      |       |      |      |      | 2.33 |
| COX17   |      | 0.55  |      |      |      |      |
| COX4I2  |      | 3.6   | 5.81 |      |      |      |
| COX6A1  |      | 0.29  |      |      |      |      |
| COX7C   |      |       |      |      |      | 0.64 |
| CPA3    |      |       | 0.23 |      |      |      |
| CPA4    |      |       |      |      | 0.5  |      |
| CPAMD8  |      | 0.53  |      |      |      |      |
| CPB1    |      |       | 0.44 |      |      |      |
| CPD     |      |       |      |      |      | 1.63 |
| CPEB3   |      |       | 0.27 |      |      | 0.39 |
| CPLX1   |      |       | 3.28 |      |      |      |
| CPM     |      |       | 0.34 |      |      |      |
| CPN1    |      |       |      |      |      | 1.61 |
| CPOX    |      | 0.49  | 0.37 |      |      |      |
| CPSF6   |      |       |      |      |      | 2.01 |
| CPVL    |      |       |      | 1.55 |      | 3.74 |
| CRAT    |      | 0.1   | 0.12 |      |      |      |
| CRBN    |      |       |      |      |      | 2.18 |
| CREB1   |      |       |      |      |      | 3.51 |
| CREBL2  |      |       |      |      |      | 1.57 |
| CREM    |      |       |      |      |      | 2.43 |

|          |      |      |       |      |      |      |
|----------|------|------|-------|------|------|------|
| CRIM1    |      |      |       |      |      | 0.47 |
| CRY2     |      |      |       |      |      | 0.51 |
| CRYAA    |      |      | 2.85  |      |      |      |
| CRYL1    |      |      | 4.98  |      |      |      |
| CS       |      | 0.4  | 0.33  |      |      |      |
| CSAD     | 0.43 |      |       |      |      |      |
| CSDA     |      |      | 3.85  |      |      |      |
| CSNK2A2  |      | 0.51 |       |      |      |      |
| CSPG2    |      | 4.35 | 14.33 |      |      |      |
| CSRP3    |      | 0.5  |       |      |      |      |
| CSTA     |      |      |       |      |      | 0.57 |
| CSTB     |      | 0.37 |       |      |      | 1.96 |
| CSTF2    |      |      |       |      |      | 1.61 |
| CTAGE5   |      |      | 0.48  |      |      | 0.55 |
| CTBP2    | 1.78 |      |       |      |      |      |
| CTDSPL   |      |      |       | 0.58 |      | 0.62 |
| CTHRC1   |      |      |       |      |      | 7.12 |
| CTNNBIP1 |      |      |       |      |      | 0.3  |
| CTNNBL1  |      |      |       |      |      | 1.74 |
| CTNND2   |      | 0.24 |       |      |      | 0.59 |
| CTSB     |      |      |       |      |      | 3.4  |
| CTSL     |      |      |       |      |      | 3.21 |
| CTSW     |      |      |       |      |      | 1.93 |
| CTTN     |      | 5.57 | 4.91  |      |      |      |
| CUEDC2   | 0.26 | 0.34 |       |      |      |      |
| CUL4B    | 2.28 |      |       |      |      | 2.68 |
| CUTL1    |      |      |       | 0.51 |      |      |
| CXCL10   |      |      |       |      |      | 7.44 |
| CXCL11   |      |      |       |      |      | 4.12 |
| CXCL14   |      | 9.34 |       |      |      | 0.45 |
| CXCL2    |      |      |       |      |      | 3.62 |
| CXCL3    |      |      |       | 0.31 |      | 2.63 |
| CXCL9    | 2.83 | 7.84 |       |      |      |      |
| CXCR4    |      |      |       |      |      | 2.46 |
| CXCR6    |      |      |       |      |      | 4.06 |
| CXorf12  |      |      |       |      |      | 0.57 |
| CXorf9   |      |      |       |      |      | 2.37 |
| CXXC5    |      |      |       | 0.66 |      | 0.62 |
| CYBB     |      |      |       |      |      | 2.15 |
| CYCS     |      |      |       |      |      | 2.73 |
| CYP11A1  |      |      |       |      | 0.65 |      |

|         |      |      |      |      |      |      |
|---------|------|------|------|------|------|------|
| CYP11B1 |      |      |      |      | 0.36 |      |
| CYP11B2 |      |      |      |      |      | 1.62 |
| CYP20A1 |      |      |      |      |      | 2.31 |
| CYP26B1 |      |      | 0.22 |      |      |      |
| CYP2E1  |      |      |      |      |      | 0.5  |
| CYP2J2  |      |      |      |      |      | 0.62 |
| CYP3A4  |      |      |      |      |      | 0.37 |
| CYP3A5  |      |      |      |      | 0.58 | 0.33 |
| CYP3A7  |      |      |      |      |      | 0.44 |
| CYP4B1  | 0.21 |      | 0.14 |      | 0.48 | 0.23 |
| CYP4F2  |      | 0.25 | 0.24 |      |      |      |
| CYP4F8  |      |      |      |      |      | 0.52 |
| CYP51A1 |      | 0.43 | 0.34 |      | 0.54 |      |
| CYP7B1  | 3.75 |      |      |      |      |      |
| CYR61   |      |      |      |      |      | 2.01 |
| DAB2    |      |      |      |      |      | 2.44 |
| DACT1   |      | 7.04 |      |      |      |      |
| DAPK2   |      | 0.5  |      |      |      |      |
| DAPP1   |      |      |      | 1.5  |      |      |
| DBI     |      |      |      |      |      | 0.6  |
| DCAMKL1 |      | 1.86 |      |      |      |      |
| DCBLD2  |      |      |      |      |      | 3    |
| DCDC2   |      |      |      |      |      | 3.67 |
| DCHS1   | 3.01 |      |      |      |      |      |
| DCI     |      |      | 3.03 |      |      |      |
| DCLRE1B |      |      |      |      |      | 1.65 |
| DCLRE1C |      |      |      |      |      | 1.63 |
| DCTN4   |      |      |      |      |      | 2.75 |
| DCTN6   |      |      |      |      |      | 2.17 |
| DCXR    |      | 0.56 |      |      |      |      |
| DDAH1   | 0.35 | 0.35 | 0.35 |      |      |      |
| DDEF1   |      |      |      |      |      | 2.74 |
| DDIT4   |      |      | 4.03 |      |      |      |
| DDIT4L  |      |      | 0.15 |      |      |      |
| DDOST   |      |      | 2.63 |      |      |      |
| DDR1    |      |      |      |      |      | 0.36 |
| DDT     |      | 0.25 |      |      |      |      |
| DDX17   |      |      |      | 1.72 |      |      |
| DDX18   |      |      |      |      | 0.6  |      |
| DDX24   |      |      |      | 1.98 |      |      |
| DDX50   |      |      |      |      | 0.55 | 0.63 |

|         |      |      |      |      |      |      |
|---------|------|------|------|------|------|------|
| DDX52   |      |      |      | 1.63 |      |      |
| DDX55   |      |      |      |      |      | 1.53 |
| DDX56   |      |      | 5.45 |      |      |      |
| DEAF1   |      |      |      |      |      | 2.06 |
| DEF6    |      | 6.03 |      |      |      |      |
| DEFA6   |      |      |      |      |      | 1.5  |
| DEFB1   | 0.37 |      |      |      |      |      |
| DFFA    |      |      |      |      |      | 2.05 |
| DFFB    |      |      |      |      |      | 1.68 |
| DFNA5   |      |      |      |      |      | 5.94 |
| DGCR2   |      |      |      |      |      | 0.42 |
| DHCR24  |      | 0.31 | 0.28 |      | 0.49 | 0.47 |
| DHCR7   |      | 0.35 |      |      |      |      |
| DHDH    |      |      |      |      |      | 1.66 |
| DHPS    |      | 0.4  |      |      |      |      |
| DHRS7   |      | 5.31 |      |      |      | 2.09 |
| DHRS8   |      |      |      |      |      | 3.38 |
| DHX33   |      |      |      | 1.62 |      | 2.16 |
| DHX57   |      |      |      |      |      | 1.62 |
| DLG3    |      |      |      |      |      | 0.47 |
| DLG5    |      |      |      |      |      | 0.44 |
| DLG7    |      |      |      |      |      | 2.53 |
| DLGAP1  |      |      |      |      |      | 3.12 |
| DLGAP4  |      |      | 4.77 |      | 0.36 |      |
| DLX2    |      |      |      |      |      | 2    |
| DLX3    |      |      |      |      | 0.49 |      |
| DMAP1   |      |      | 2.42 |      |      |      |
| DMD     | 4.4  |      |      |      |      | 0.48 |
| DMTF1   |      | 2.23 |      |      |      |      |
| DNA2L   |      |      |      |      |      | 1.86 |
| DNAJA2  |      |      |      |      |      | 2.15 |
| DNAJA3  |      |      | 0.43 |      |      |      |
| DNAJA4  |      | 0.32 |      |      |      |      |
| DNAJB11 |      |      |      |      |      | 2.21 |
| DNAJB4  | 3.04 |      |      |      |      |      |
| DNAJC10 |      |      |      |      |      | 1.69 |
| DNAJC12 |      |      |      |      |      | 1.5  |
| DNAJC3  |      |      |      | 1.97 |      | 1.7  |
| DNAJC5B |      | 1.65 |      |      |      |      |
| DNAJC8  |      |      | 3.02 |      |      |      |
| DNM1    |      |      |      |      | 0.66 |      |



|        |      |      |      |      |      |      |
|--------|------|------|------|------|------|------|
| DNM1L  |      |      |      |      |      | 2.57 |
| DNMT2  |      |      |      |      |      | 1.5  |
| DNMT3B |      |      |      |      |      | 0.62 |
| DOCK11 |      |      |      |      |      | 1.85 |
| DOCK5  |      |      |      |      |      | 1.5  |
| DOCK8  |      | 2.34 |      |      |      |      |
| DOK3   |      |      |      |      |      | 1.5  |
| DOK4   |      |      |      |      |      | 0.4  |
| DONSON |      |      | 0.45 |      |      | 2.27 |
| DPEP2  |      |      |      |      |      | 2.05 |
| DPF2   |      |      | 4.1  |      | 0.66 |      |
| DPP3   |      | 0.53 |      |      |      |      |
| DPYSL2 | 3.11 |      |      |      |      |      |
| DSC3   |      |      |      |      |      | 0.42 |
| DSP    |      |      |      |      |      | 0.5  |
| DTX2   |      | 0.47 | 0.48 |      |      |      |
| DUOX2  |      |      |      |      |      | 0.66 |
| DUSP1  |      | 0.31 |      |      |      |      |
| DUSP10 |      |      |      |      |      | 2.26 |
| DUSP11 |      |      |      | 1.69 |      |      |
| DUSP14 | 3.47 |      |      |      |      |      |
| DUSP2  | 0.31 | 0.18 | 0.3  |      |      |      |
| DUSP4  |      |      |      |      | 0.58 |      |
| DUSP9  |      |      | 1.93 |      |      |      |
| DVL1   |      |      |      |      |      | 1.5  |
| DYRK3  |      |      |      |      |      | 2.02 |
| DYSF   |      |      | 0.13 |      |      |      |
| E2F5   | 4.15 |      |      |      |      |      |
| EBI2   |      |      |      |      |      | 6.06 |
| ECHDC1 |      |      |      |      |      | 2.66 |
| ECT2   |      | 2.03 |      |      |      | 2.43 |
| EDAR   |      | 9.08 |      |      |      |      |
| EDF1   |      |      | 1.85 |      |      |      |
| EEF1A1 |      |      |      |      |      | 0.59 |
| EEF1E1 |      |      |      |      |      | 2.26 |
| EEF2K  |      |      |      |      |      | 0.66 |
| EFHC2  |      | 4.33 |      |      |      | 0.55 |
| EFHD1  |      |      |      |      | 0.47 |      |
| EFNA1  |      |      |      |      |      | 0.44 |
| EFNB3  |      |      |      |      | 0.56 | 0.64 |
| EGFL7  |      |      |      |      |      | 1.85 |

|           |      |      |       |      |      |      |
|-----------|------|------|-------|------|------|------|
| EGLN1     |      |      | 3.67  |      |      |      |
| EGR1      | 0.15 | 0.13 | 0.17  |      |      |      |
| EHD3      |      |      |       |      |      | 1.93 |
| EIF2S1    |      |      |       |      |      | 2.66 |
| EIF2S2    |      |      |       |      |      | 1.78 |
| EIF3S7    |      |      |       |      |      | 0.6  |
| EIF4A1    |      |      |       |      |      | 2.53 |
| EIF4B     |      |      |       | 0.55 |      |      |
| EIF4ENIF1 |      |      |       |      |      | 0.6  |
| EIF4G1    |      | 1.52 | 8.56  |      |      |      |
| EIF5      |      |      |       |      |      | 1.79 |
| EIF5A     |      |      |       | 1.6  |      |      |
| ELAC2     |      |      | 0.63  |      |      |      |
| ELF2      | 0.45 |      |       |      |      |      |
| ELF3      |      |      |       |      |      | 2.13 |
| ELF5      |      | 0.22 |       | 0.54 |      |      |
| ELK1      |      |      | 0.4   |      |      |      |
| ELL2      |      |      |       |      |      | 0.57 |
| ELL3      |      |      |       |      |      | 0.54 |
| ELMOD1    |      |      |       |      |      | 0.37 |
| ELOVL2    | 0.46 |      |       |      |      |      |
| ELOVL5    |      |      |       | 2.44 |      | 2.98 |
| ELOVL6    |      |      |       |      | 0.36 |      |
| EMD       |      |      | 4.64  |      |      |      |
| EMILIN2   |      |      |       |      |      | 2.75 |
| EMILIN3   |      |      |       |      | 0.52 |      |
| EML4      |      |      | 16.23 |      |      |      |
| EMP2      |      | 0.43 | 0.62  |      |      | 0.53 |
| EMR2      |      |      |       |      |      | 1.6  |
| EMR3      |      |      |       |      |      | 2.09 |
| EMX2      |      |      |       |      |      | 0.4  |
| ENAH      |      | 3.89 |       |      |      |      |
| ENDOGL1   |      |      |       |      |      | 2.27 |
| ENPP1     |      |      | 0.28  |      |      |      |
| ENPP6     | 0.23 |      |       |      |      |      |
| ENTPD2    |      |      |       |      | 0.66 |      |
| ENTPD8    |      |      |       |      | 1.66 |      |
| EP300     |      |      |       | 1.8  |      |      |
| EPB41L1   |      |      |       |      |      | 0.61 |
| EPB41L4B  |      |      |       |      |      | 0.39 |
| EPHA5     |      |      |       | 2.33 |      |      |

|         |      |      |       |      |      |      |
|---------|------|------|-------|------|------|------|
| EPHX2   |      |      |       |      |      | 0.53 |
| EPO     |      |      |       |      | 1.67 |      |
| ERBB2   |      |      |       |      |      | 0.65 |
| ERCC2   |      |      |       |      | 0.46 | 0.48 |
| ERF     |      | 4.25 | 10.05 |      |      |      |
| ERG     |      |      |       |      |      | 2.01 |
| ERO1L   |      | 0.38 |       |      |      | 2.41 |
| ERVWE1  |      | 6.82 |       |      |      |      |
| ESR1    |      |      |       |      |      | 0.66 |
| ETFA    |      |      |       | 1.54 |      | 2.36 |
| ETNK1   |      |      |       |      |      | 2.85 |
| ETS2    |      |      |       |      |      | 0.42 |
| ETV6    |      |      |       |      |      | 1.66 |
| EVI2B   | 0.37 |      |       |      |      |      |
| EVPL    |      |      |       |      | 0.63 |      |
| EVX1    |      |      |       |      | 0.53 |      |
| EXO1    |      |      |       |      |      | 2.29 |
| EXOSC1  |      |      | 0.57  |      |      |      |
| EXOSC7  |      |      |       |      |      | 0.63 |
| EZH1    |      |      | 0.3   |      |      |      |
| F10     |      |      | 0.2   |      |      |      |
| F11R    |      |      |       |      |      | 0.62 |
| F2      |      |      |       |      |      | 1.51 |
| F2R     |      | 5.92 |       |      |      |      |
| F2RL1   |      |      | 0.34  |      |      |      |
| FA2H    |      | 0.07 | 0.17  |      |      |      |
| FAAH    |      | 0.44 |       |      |      |      |
| FABP4   |      | 0.08 | 0.05  |      |      |      |
| FABP5   |      |      |       |      |      | 3.63 |
| FADS2   |      | 0.12 | 0.19  |      |      |      |
| FALZ    |      |      |       |      | 0.66 |      |
| FAM13C1 |      |      |       |      |      | 0.43 |
| FAM20A  |      | 8.99 | 6.19  |      |      | 1.68 |
| FAM29A  | 2.64 |      |       | 1.79 |      | 2.07 |
| FAM32A  | 0.4  |      |       |      |      |      |
| FAM40A  |      |      | 0.37  |      |      |      |
| FAM49A  |      |      |       |      |      | 2.23 |
| FANCC   |      |      |       |      |      | 0.54 |
| FANCE   |      |      |       |      |      | 0.66 |
| FAP     |      |      |       |      |      | 2.35 |
| FARP1   |      |      |       |      |      | 1.65 |

|          |      |      |      |      |      |      |
|----------|------|------|------|------|------|------|
| FARSLA   |      | 0.55 |      |      |      |      |
| FBL      |      | 2.45 | 7.48 | 0.62 |      | 0.57 |
| FBLN1    |      |      |      | 1.65 |      |      |
| FBXL16   |      |      |      |      |      | 0.35 |
| FBXL19   |      |      |      |      | 0.4  |      |
| FBXO11   |      |      |      |      |      | 2.41 |
| FBXO17   |      |      |      |      | 0.51 |      |
| FBXO32   |      | 4.67 |      | 1.74 |      | 2.42 |
| FBXO36   |      |      |      |      |      | 2.02 |
| FBXO7    |      |      |      |      | 0.39 |      |
| FBXO8    |      |      | 0.43 |      |      |      |
| FBXW10   |      | 0.18 | 0.18 |      |      |      |
| FBXW7    |      |      |      |      |      | 0.45 |
| FBXW9    |      | 0.51 |      |      |      |      |
| FCER1G   |      |      |      |      |      | 2.07 |
| FCER2    |      |      |      |      |      | 1.73 |
| FCGBP    |      |      |      |      |      | 0.39 |
| FCGR2A   |      |      |      |      |      | 4.17 |
| FCGR2B   |      |      | 0.18 |      |      | 2.67 |
| FCGR3A   |      |      |      |      |      | 4.86 |
| FCN1     |      |      |      |      |      | 3.11 |
| FDFT1    |      |      | 0.36 |      |      |      |
| FEM1B    |      |      | 0.35 |      |      |      |
| FEM1C    |      |      |      |      |      | 1.75 |
| FEN1     | 2.21 |      | 5.2  |      |      | 1.78 |
| FER      |      |      |      |      |      | 1.5  |
| FER1L3   |      |      |      |      |      | 0.47 |
| FEZ2     |      | 2.21 |      |      |      | 1.71 |
| FGD1     |      |      |      |      | 0.58 |      |
| FGF1     |      |      |      |      |      | 2.77 |
| FGF16    |      | 2.13 | 4.03 |      |      |      |
| FGF20    |      |      | 0.22 |      |      |      |
| FGF22    |      | 0.44 |      |      |      |      |
| FGF3     |      |      |      |      |      | 0.59 |
| FGFR1    |      |      | 0.43 |      |      |      |
| FGFR1OP2 |      |      |      |      |      | 2.32 |
| FGFR3    |      |      |      |      |      | 0.27 |
| FGG      |      |      | 3.07 |      |      |      |
| FGL2     |      |      | 0.24 |      |      |      |
| FH       |      |      |      |      |      | 3.11 |
| FHOD1    |      |      |      |      |      | 1.69 |

|           |      |      |       |      |      |      |
|-----------|------|------|-------|------|------|------|
| FIGN      |      |      |       |      |      | 1.84 |
| FIGNL1    |      |      |       |      |      | 1.74 |
| FKBP11    |      |      | 3     |      |      | 2.55 |
| FKBP3     |      |      |       |      |      | 1.73 |
| FKBP8     |      |      | 17.65 |      |      |      |
| FKBP9L    |      |      |       |      |      | 2.27 |
| FLG       |      | 7.28 |       |      |      | 0.61 |
| FLNA      |      |      | 8.28  |      |      |      |
| FLNC      |      |      |       |      | 1.53 |      |
| FLOT2     |      |      |       |      | 1.98 |      |
| FMNL1     |      |      |       |      | 2.28 | 2.31 |
| FMO1      |      |      |       |      |      | 0.51 |
| FMO3      |      |      |       |      |      | 1.5  |
| FOSL1     |      |      |       |      |      | 1.81 |
| FOXD2     |      |      |       |      | 0.45 |      |
| FOXK2     | 3.33 |      |       |      |      |      |
| FOXO1A    |      |      |       |      |      | 0.56 |
| FOXQ1     |      |      |       |      |      | 0.25 |
| FRAS1     |      | 3.5  |       |      |      |      |
| FRS3      |      |      |       |      |      | 1.5  |
| FSTL5     |      |      |       |      |      | 3.23 |
| FTH1      |      |      |       |      | 0.63 | 1.98 |
| FUCA1     |      |      |       |      |      | 3.41 |
| FUCA2     |      |      |       |      |      | 2.59 |
| FUSIP1    |      |      |       | 1.71 |      | 2.34 |
| FVT1      |      |      | 0.39  |      |      |      |
| FXYD5     |      |      | 9.13  |      |      |      |
| FYB       |      |      |       |      |      | 2.52 |
| FZD2      |      | 2.93 |       |      |      |      |
| FZD5      | 7.03 |      |       |      |      |      |
| FZD7      |      |      | 3.1   |      |      |      |
| FZR1      |      |      |       |      |      | 1.89 |
| GAB1      |      |      |       |      |      | 1.59 |
| GABARAPL1 |      | 0.19 |       |      |      |      |
| GABPA     |      |      |       |      |      | 1.83 |
| GABPB2    | 0.33 |      | 0.28  |      |      | 1.64 |
| GABRA2    |      |      |       |      | 0.47 | 0.62 |
| GABRE     |      |      |       |      |      | 0.36 |
| GALK1     |      |      |       |      |      | 1.73 |
| GALNTL1   |      | 0.19 |       |      |      |      |
| GALNTL5   |      |      |       |      |      | 0.66 |

|         |      |      |       |  |      |      |
|---------|------|------|-------|--|------|------|
| GALR3   |      |      | 2.39  |  |      |      |
| GAP43   |      |      |       |  |      | 0.63 |
| GAS2    | 8.71 |      | 9.36  |  |      |      |
| GAS6    |      |      | 32.02 |  |      |      |
| GAS7    |      |      |       |  |      | 2.16 |
| GATA3   |      |      |       |  |      | 0.37 |
| GATM    |      |      |       |  | 0.37 | 0.24 |
| GBA     |      |      | 3.16  |  |      |      |
| GBA2    |      |      | 0.48  |  |      |      |
| GBF1    |      |      | 0.66  |  |      |      |
| GBP5    |      |      |       |  |      | 3.42 |
| GCNT3   |      | 0.12 |       |  |      |      |
| GDA     |      |      |       |  |      | 2.05 |
| GDF15   |      |      |       |  |      | 7.82 |
| GDF5    |      |      |       |  |      | 1.84 |
| GDPD2   |      |      |       |  |      | 0.27 |
| GEM     |      | 7.32 |       |  |      | 2.57 |
| GFPT1   |      |      |       |  |      | 2.01 |
| GFPT2   |      |      | 0.39  |  |      |      |
| GFRA2   |      |      |       |  | 0.66 |      |
| GFRA3   |      |      |       |  |      | 0.6  |
| GFRA4   |      |      |       |  |      | 1.5  |
| GGH     |      |      |       |  |      | 2.99 |
| GHITM   |      |      | 0.41  |  |      |      |
| GHR     | 0.25 | 0.14 | 0.2   |  |      |      |
| GHRH    |      |      | 4.4   |  |      |      |
| GJA1    |      | 2.07 |       |  |      |      |
| GJB4    |      | 0.18 |       |  |      |      |
| GJB6    |      |      |       |  |      | 2.9  |
| GK      |      |      |       |  |      | 2.43 |
| GLA     |      |      |       |  |      | 1.82 |
| GLE1L   | 1.62 |      | 11.75 |  |      |      |
| GLRA3   | 0.51 |      |       |  |      |      |
| GLS     |      |      |       |  |      | 2.01 |
| GLTSCR1 |      |      |       |  | 0.54 | 0.6  |
| GLTSCR2 |      |      |       |  |      | 0.51 |
| GLYAT   |      |      |       |  | 0.55 |      |
| GNA12   |      |      | 9.27  |  |      |      |
| GNA13   | 2.33 | 2.78 |       |  |      | 1.77 |
| GNAI2   | 3.41 | 2.75 | 3.98  |  |      |      |
| GNB5    |      |      |       |  |      | 1.5  |

|          |     |      |       |      |      |      |
|----------|-----|------|-------|------|------|------|
| GNG13    |     |      |       |      | 0.48 |      |
| GNG7     |     |      |       |      | 0.46 |      |
| GNG8     |     |      | 14.5  |      |      |      |
| GNLY     |     |      |       |      |      | 3.39 |
| GPNAT1   |     |      | 0.47  |      |      |      |
| GNS      | 2.2 |      |       |      |      |      |
| GOLGA1   |     |      |       |      |      | 0.62 |
| GOLGA2   |     |      |       |      | 0.62 |      |
| GOSR1    |     |      |       |      |      | 1.6  |
| GOT2     |     |      | 0.57  |      |      |      |
| GP9      |     |      |       |      |      | 2.47 |
| GPD1     |     |      |       |      | 0.66 |      |
| GPD1L    |     |      |       |      | 0.66 |      |
| GPM6A    |     | 0.24 |       |      |      |      |
| GPR143   |     |      |       |      |      | 2.3  |
| GPR18    |     |      |       |      |      | 2.16 |
| GPR19    |     |      |       |      |      | 1.89 |
| GPR30    |     |      |       |      |      | 0.66 |
| GPR34    |     |      |       |      |      | 2.74 |
| GPR37    |     |      |       |      | 0.23 |      |
| GPR37L1  |     | 0.36 |       |      |      |      |
| GPR4     |     |      |       |      |      | 2.88 |
| GPR61    |     |      | 0.6   |      |      |      |
| GPR65    |     |      |       |      |      | 3.06 |
| GPR75    |     |      |       |      |      | 0.51 |
| GPR84    |     |      |       |      |      | 1.8  |
| GPRASP2  |     |      |       |      | 0.58 | 0.62 |
| GPSM3    |     |      | 4.32  |      |      | 1.56 |
| GRAP     |     |      |       |      |      | 1.54 |
| GRB7     |     | 0.29 |       |      |      |      |
| GRID1    |     |      |       |      |      | 0.52 |
| GRIK3    |     |      |       |      |      | 1.5  |
| GRIN3B   |     |      |       |      |      | 1.67 |
| GRINL1A  |     |      |       |      | 0.59 |      |
| GRK7     |     |      |       |      |      | 0.39 |
| GRM1     |     |      | 40.94 |      |      |      |
| GSTM5    |     |      | 0.06  |      | 0.61 |      |
| GSTO1    |     |      |       |      |      | 2.44 |
| GSTT2    |     |      |       |      |      | 0.32 |
| GTF2A2   |     |      |       |      |      | 1.9  |
| GTF2IRD1 |     |      |       | 0.64 |      | 0.48 |

|          |      |      |      |      |      |  |
|----------|------|------|------|------|------|--|
| GTF3C5   |      | 2.03 | 4.44 |      |      |  |
| GTPBP2   |      |      | 5.39 |      |      |  |
| GTPBP3   |      |      |      | 1.7  | 1.99 |  |
| GTPBP4   |      |      |      |      | 1.5  |  |
| GTPBP6   |      |      |      |      | 1.86 |  |
| GULP1    | 0.33 |      |      |      |      |  |
| GYPC     |      |      | 0.29 |      |      |  |
| GZMA     |      |      |      |      | 2.1  |  |
| GZMB     |      |      |      |      | 2.52 |  |
| GZMK     |      |      |      |      | 3.18 |  |
| H2AFZ    |      |      | 1.9  |      | 2.73 |  |
| HABP4    |      | 0.42 |      |      | 1.6  |  |
| HADH2    |      | 0.42 | 0.47 |      |      |  |
| HADHA    | 0.55 |      |      |      |      |  |
| HADHSC   |      | 0.38 |      |      |      |  |
| HAMP     | 0.21 | 0.33 |      |      |      |  |
| HAO2     |      | 0.04 | 0.08 |      |      |  |
| HARSL    |      |      |      |      | 1.63 |  |
| HAS2     |      |      |      |      | 2.33 |  |
| HAT1     |      |      |      |      | 2.84 |  |
| HBQ1     |      |      |      |      | 0.6  |  |
| HBXIP    |      |      |      |      | 2.02 |  |
| HCN2     |      |      |      | 0.47 |      |  |
| HCN4     |      |      |      | 0.41 |      |  |
| HCRT     |      |      |      | 0.6  |      |  |
| HDAC5    |      |      |      | 0.51 | 0.59 |  |
| HEBP2    |      |      | 0.39 |      |      |  |
| HECTD1   |      | 0.31 |      |      |      |  |
| HEPH     |      |      | 2.22 |      |      |  |
| HERC3    |      |      |      |      | 0.52 |  |
| HES1     |      |      |      | 0.55 | 0.49 |  |
| HES6     |      |      |      |      | 1.57 |  |
| HESX1    |      |      |      |      | 1.76 |  |
| HEXA     |      |      |      |      | 2.28 |  |
| HEXB     |      |      |      |      | 2.5  |  |
| HEY1     |      |      |      | 1.91 |      |  |
| HFE      |      |      |      |      | 1.8  |  |
| HGD      |      |      |      |      | 0.58 |  |
| HIBCH    |      |      |      |      | 2.33 |  |
| HIST1H1C |      |      |      | 1.73 | 2.24 |  |
| HIST1H1E |      | 5.6  |      |      |      |  |



|           |      |      |      |      |      |
|-----------|------|------|------|------|------|
| HIST1H1T  |      |      | 5.2  |      |      |
| HIST1H2BM |      |      |      |      | 2.22 |
| HK1       |      |      | 0.55 |      |      |
| HK2       |      |      |      |      | 1.71 |
| HLA-C     |      |      |      |      | 0.6  |
| HLA-DMA   |      |      |      |      | 3.35 |
| HLA-DMB   |      |      |      |      | 1.92 |
| HLA-DOA   |      |      |      | 1.5  | 2.48 |
| HLA-DPA1  |      |      |      | 1.95 |      |
| HLA-DPB1  |      |      |      | 1.74 | 3.14 |
| HLA-DQA2  | 6.04 |      |      |      |      |
| HLA-G     |      |      |      | 1.55 |      |
| HLF       |      |      |      | 0.54 | 0.29 |
| HM13      |      |      |      |      | 3.11 |
| HMG4L     |      |      |      |      | 1.69 |
| HMGB1     |      | 8.01 |      |      | 0.64 |
| HMGCR     |      | 0.45 |      |      | 0.56 |
| HMGCS2    |      | 0.07 |      |      |      |
| HMGN4     |      |      |      |      | 1.81 |
| HNRPA2B1  |      |      |      |      | 2.23 |
| HNRPDL    |      |      |      |      | 2.18 |
| HNRPH3    |      | 1.99 |      |      |      |
| HNRPL     |      |      |      | 1.5  |      |
| HNRPM     |      |      |      |      | 0.62 |
| HOMER1    |      |      |      |      | 1.91 |
| HOOK2     |      |      | 0.51 |      |      |
| HOXB2     |      |      |      |      | 1.72 |
| HOXC10    |      |      |      | 0.55 |      |
| HOXC11    |      | 3.18 |      |      |      |
| HOXC4     |      |      |      | 1.65 |      |
| HPCAL1    |      |      | 2.61 |      | 1.74 |
| HPGD      |      |      |      | 1.61 |      |
| HPN       |      |      | 3.48 |      |      |
| HPS3      |      |      |      |      | 2.82 |
| HRAS      |      |      | 2.02 |      |      |
| HRG       |      |      | 6.26 |      |      |
| HRH1      |      |      |      | 2.22 |      |
| HRK       |      |      |      |      | 4.3  |
| HS3ST2    |      |      |      |      | 4    |
| HSD17B2   |      | 0.19 |      |      |      |
| HSD3B1    |      |      | 0.1  |      |      |

|         |  |      |      |      |      |      |
|---------|--|------|------|------|------|------|
| HSPA14  |  | 0.37 | 0.34 |      |      |      |
| HSPA1L  |  |      | 8.7  |      |      |      |
| HSPA4   |  |      |      |      |      | 3.19 |
| HSPA6   |  |      |      |      |      | 2.82 |
| HSPB1   |  |      | 6.4  |      |      |      |
| HSPE1   |  |      |      |      |      | 0.59 |
| HSPH1   |  | 2.65 |      |      |      | 1.7  |
| HTATIP  |  |      | 2.88 |      |      |      |
| HTR2B   |  | 0.42 |      |      |      |      |
| HTR5A   |  |      |      |      |      | 1.64 |
| HUS1    |  |      |      |      |      | 2.25 |
| ICMT    |  |      |      |      |      | 2.06 |
| ICT1    |  | 0.53 |      |      |      |      |
| ID4     |  |      | 0.38 |      |      |      |
| IDH1    |  |      | 0.28 |      |      |      |
| IDH3A   |  |      |      |      |      | 1.7  |
| IDUA    |  |      |      |      |      | 1.89 |
| IFI30   |  |      |      |      |      | 2.59 |
| IFI44   |  |      |      |      |      | 3.79 |
| IFIH1   |  |      |      | 1.79 |      | 2.53 |
| IFRD1   |  |      |      |      |      | 2.57 |
| IGF2R   |  |      |      |      |      | 2.46 |
| IGFBP2  |  |      | 2.6  |      |      | 1.79 |
| IGFBP5  |  |      |      |      |      | 1.6  |
| IGFBP7  |  | 2.21 |      |      |      |      |
| IGSF4C  |  |      |      |      |      | 1.66 |
| IGSF6   |  |      |      | 2.03 |      | 2.91 |
| IGSF9   |  |      |      |      |      | 0.47 |
| IHPK2   |  |      | 4.92 |      |      | 0.62 |
| IKBKB   |  |      | 1.66 |      |      |      |
| IL12RB2 |  |      |      |      |      | 1.8  |
| IL13    |  |      |      |      |      | 0.58 |
| IL15RA  |  |      |      |      | 0.31 |      |
| IL16    |  |      |      |      |      | 1.76 |
| IL17B   |  |      |      |      |      | 1.7  |
| IL17C   |  |      |      |      | 1.57 | 1.7  |
| IL17RC  |  |      |      |      | 1.76 |      |
| IL18BP  |  |      |      |      |      | 2.75 |
| IL1F7   |  |      |      |      |      | 0.41 |
| IL1RAP  |  |      |      |      |      | 2.04 |
| IL20RA  |  |      |      |      |      | 0.4  |

|          |      |      |      |      |      |      |
|----------|------|------|------|------|------|------|
| IL21R    |      |      |      |      |      | 2.02 |
| IL22RA1  |      |      |      |      |      | 0.39 |
| IL27RA   |      |      |      |      |      | 1.82 |
| IL2RA    |      |      |      |      |      | 2.3  |
| IL6      |      |      |      |      |      | 1.89 |
| IL6R     |      |      |      | 1.99 |      |      |
| IL7      |      |      | 0.2  |      |      |      |
| IMPA1    |      |      |      |      |      | 2    |
| IMPDH2   |      | 0.43 | 0.41 |      |      |      |
| INDO     |      |      |      |      |      | 3.2  |
| INE1     |      |      |      |      |      | 0.62 |
| ING4     |      | 1.66 |      |      |      |      |
| ING5     |      |      |      |      |      | 0.55 |
| INPP1    |      |      |      | 2.03 |      |      |
| INPP4B   |      |      |      | 1.69 |      | 2.65 |
| INSRR    |      |      |      |      |      | 1.54 |
| IPO7     |      |      |      | 1.5  |      |      |
| IPO9     |      |      |      |      |      | 1.9  |
| IQCA     |      |      | 7.04 |      |      |      |
| IQCC     |      |      |      |      |      | 1.71 |
| IRX5     |      |      |      |      |      | 0.45 |
| ISLR     |      |      |      |      |      | 0.57 |
| ITCH     |      |      |      |      |      | 1.76 |
| ITGA2B   |      |      |      |      |      | 1.85 |
| ITGA7    |      | 0.27 | 0.13 |      |      |      |
| ITGAL    |      |      |      |      |      | 2.07 |
| ITGAX    |      |      |      |      |      | 2.92 |
| ITGB1BP1 |      |      |      |      |      | 2.07 |
| ITGB3    |      |      |      |      |      | 1.58 |
| ITGB3BP  |      |      |      |      |      | 1.85 |
| ITGB8    |      |      |      |      |      | 0.52 |
| ITM2B    |      |      |      |      |      | 0.61 |
| ITPKC    |      | 0.37 |      |      |      |      |
| ITPR3    |      |      | 2.22 |      |      |      |
| IVL      |      | 2.43 | 2.93 |      |      |      |
| JAK3     | 2.25 |      |      |      | 0.47 | 2.14 |
| JPH2     |      |      |      |      | 0.5  |      |
| JUB      |      |      |      |      |      | 0.39 |
| JUNB     |      |      |      |      | 0.45 |      |
| KAL1     |      | 2.96 |      |      |      |      |
| KATNAL1  |      |      |      |      |      | 1.53 |

|          |      |      |      |     |      |      |
|----------|------|------|------|-----|------|------|
| KBTBD2   |      |      |      |     |      | 2.15 |
| KCNAB3   | 0.38 |      |      |     |      |      |
| KCNE3    |      |      |      |     |      | 1.7  |
| KCNH4    |      |      |      |     |      | 0.57 |
| KCNIP1   | 3.3  |      |      |     |      |      |
| KCNJ16   |      |      |      |     |      | 0.66 |
| KCNK12   |      |      |      |     | 0.32 |      |
| KCNK15   |      |      |      |     | 0.62 |      |
| KCNK6    | 0.43 |      |      |     |      |      |
| KCNQ4    |      |      | 4.09 |     |      |      |
| KCNV1    | 0.25 | 0.26 |      |     |      |      |
| KCTD12   |      |      |      |     |      | 1.66 |
| KDEL2    |      |      |      |     |      | 2.29 |
| KEAP1    |      | 0.42 | 0.39 |     |      |      |
| KIAA0103 |      |      |      |     |      | 1.71 |
| KIAA0258 |      |      | 0.26 |     |      |      |
| KIAA0274 |      |      |      |     |      | 2.17 |
| KIAA0284 |      | 0.46 |      |     |      |      |
| KIAA0913 |      |      |      |     | 0.37 |      |
| KIAA1212 |      |      |      |     |      | 1.91 |
| KIAA1305 |      |      |      |     | 0.66 |      |
| KIAA1529 |      |      |      |     |      | 1.8  |
| KIAA1704 |      |      |      |     |      | 2.21 |
| KIAA1715 |      |      |      |     | 0.65 |      |
| KIAA1754 |      |      |      |     |      | 0.65 |
| KIAA1900 | 7.53 |      |      |     |      |      |
| KIAA2010 |      | 2.6  |      |     |      |      |
| KIF12    |      |      | 3    |     |      |      |
| KIF1C    |      |      |      |     | 0.57 |      |
| KIF20A   |      |      |      |     |      | 2.07 |
| KIF22    |      |      | 5.34 |     |      |      |
| KIF23    |      |      |      |     |      | 1.75 |
| KIF3A    |      | 3.6  |      | 1.5 |      | 1.58 |
| KIF5B    |      |      |      |     |      | 1.87 |
| KIN      |      |      |      |     |      | 2.62 |
| KIRREL   |      |      |      |     |      | 2.67 |
| KLF5     |      |      |      |     |      | 0.28 |
| KLF8     |      |      | 0.14 |     |      | 0.56 |
| KLHL7    |      |      |      |     |      | 1.93 |
| KLK1     |      |      |      |     |      | 0.42 |
| KLK13    |      |      |      |     |      | 1.56 |

|          |      |      |      |      |      |      |
|----------|------|------|------|------|------|------|
| KLK3     |      |      |      |      | 0.63 | 0.55 |
| KLK6     |      |      |      |      |      | 1.76 |
| KLRB1    |      |      |      |      |      | 2.35 |
| KLRC4    |      |      |      |      |      | 2.11 |
| KLRD1    |      |      |      |      |      | 2.93 |
| KLRF1    |      |      |      |      |      | 2.18 |
| KNDC1    |      |      |      |      | 0.66 |      |
| KNTC1    |      |      |      |      |      | 1.88 |
| KNTC2    |      |      |      |      |      | 3.07 |
| KPNA2    |      |      |      |      |      | 1.95 |
| KPNA4    |      |      |      |      |      | 1.65 |
| KPNB1    |      |      |      |      |      | 2.23 |
| KRT1     |      |      |      |      |      | 0.54 |
| KRT10    |      |      |      |      |      | 0.55 |
| KRT15    |      |      |      |      |      | 0.26 |
| KRT17    |      |      | 7.37 |      |      |      |
| KRT23    |      |      |      |      |      | 0.48 |
| KRT3     |      |      |      |      | 0.41 |      |
| KRTAP3-1 |      | 0.16 |      |      |      |      |
| KYNU     |      |      |      | 1.57 |      | 3.05 |
| LACE1    |      |      |      |      |      | 1.89 |
| LAD1     |      |      |      |      |      | 0.34 |
| LAG3     |      | 2.39 |      |      |      | 1.77 |
| LAIR1    |      |      |      |      |      | 2.64 |
| LAP3     |      |      |      |      |      | 3.85 |
| LAPTM4B  | 4.55 |      |      |      |      |      |
| LCP2     |      |      |      |      |      | 3.96 |
| LDB1     | 0.29 |      |      |      |      |      |
| LDHA     |      |      |      |      |      | 2.21 |
| LDHB     |      | 3.99 |      |      |      |      |
| LEF1     |      |      |      |      |      | 2.09 |
| LEMD2    |      |      |      |      | 0.65 |      |
| LENG8    |      |      |      |      | 0.41 | 0.57 |
| LFNG     |      |      |      |      |      | 1.5  |
| LGALS1   |      |      | 6.48 |      |      |      |
| LGALS12  |      | 2.31 |      |      |      |      |
| LGALS13  |      |      |      |      |      | 2.8  |
| LGALS4   |      | 5.52 |      |      |      |      |
| LHFPL2   |      |      |      |      |      | 2.73 |
| LHX6     |      |      |      | 1.52 |      | 2.46 |
| LIF      |      |      |      |      |      | 1.53 |

|         |      |       |      |  |      |      |
|---------|------|-------|------|--|------|------|
| LILRA1  |      |       | 2.81 |  |      |      |
| LILRB3  |      |       |      |  |      | 2    |
| LILRB5  |      |       |      |  |      | 1.97 |
| LIMK2   |      |       | 5.06 |  |      |      |
| LIN7B   |      |       |      |  |      | 0.51 |
| LIPA    |      |       |      |  |      | 2.24 |
| LIPC    |      |       |      |  |      | 0.63 |
| LLGL1   |      |       |      |  |      | 0.57 |
| LMAN2   |      |       | 2.71 |  |      |      |
| LMNA    |      |       | 28.9 |  |      |      |
| LMO3    |      |       |      |  | 0.51 |      |
| LMX1B   |      |       |      |  |      | 1.61 |
| LNPEP   |      |       |      |  |      | 1.71 |
| LPAL2   |      | 5.74  |      |  |      |      |
| LPIN1   |      | 0.24  | 0.21 |  |      | 2.05 |
| LPXN    |      |       |      |  |      | 2.93 |
| LRCH1   |      |       | 0.53 |  |      |      |
| LRG1    |      |       |      |  | 0.66 |      |
| LRP2    |      |       | 0.18 |  |      |      |
| LRP4    |      |       |      |  |      | 0.28 |
| LRP8    |      |       |      |  |      | 4.61 |
| LRRC14  |      |       |      |  |      | 0.6  |
| LRRFIP2 |      |       |      |  |      | 2.07 |
| LRRN1   |      |       |      |  |      | 0.43 |
| LRRN5   |      |       |      |  | 0.46 | 0.63 |
| LRRN6A  |      |       | 2.43 |  |      |      |
| LRSAM1  |      | 0.51  | 0.36 |  |      |      |
| LSAMP   |      |       |      |  |      | 0.63 |
| LSM1    |      |       |      |  |      | 1.86 |
| LSM10   |      |       |      |  |      | 2.66 |
| LSS     |      |       |      |  |      | 0.5  |
| LTB     |      | 2.15  |      |  |      |      |
| LTBP2   |      |       |      |  | 1.51 | 2.09 |
| LUM     | 5.82 | 11.79 |      |  |      | 2.92 |
| LY6E    |      |       | 2.65 |  |      |      |
| LY86    |      |       | 6.84 |  |      |      |
| LY96    |      |       | 0.32 |  |      | 3.04 |
| LYL1    |      |       |      |  |      | 1.58 |
| LYZ     |      | 1.86  |      |  |      |      |
| LZIC    |      |       | 5.21 |  |      |      |
| LZTFL1  |      | 2.17  |      |  |      |      |

|           |      |      |      |      |      |      |
|-----------|------|------|------|------|------|------|
| MAD2L1    |      |      |      |      |      | 3.83 |
| MAD2L1BP  | 0.66 |      |      |      |      | 1.67 |
| MAGEA12   |      |      |      | 0.63 |      |      |
| MAGEA9    | 0.3  | 0.09 |      |      |      |      |
| MAGEC2    |      |      |      |      |      | 0.59 |
| MAGED2    | 1.97 |      | 7.39 |      |      |      |
| MAGI1     |      |      |      |      |      | 0.44 |
| MAMDC2    |      | 0.21 | 0.18 |      |      |      |
| MAML1     |      |      |      |      |      | 0.57 |
| MAN1C1    |      |      | 0.33 |      |      |      |
| MAN2A1    |      |      |      |      | 0.66 |      |
| MANBA     |      |      |      |      |      | 1.5  |
| MAP2K1IP1 |      |      | 0.53 |      |      | 2.16 |
| MAP2K7    |      |      |      |      |      | 1.5  |
| MAP3K3    |      |      |      |      | 0.59 |      |
| MAP4K4    |      |      |      |      |      | 2.97 |
| MAP4K5    |      |      |      | 1.98 |      | 2.07 |
| MAPK11    |      |      |      |      |      | 1.5  |
| MAPK3     |      | 0.19 |      |      |      |      |
| MAPK8     |      | 0.29 |      |      |      |      |
| MAPRE1    |      |      |      |      |      | 1.59 |
| MAPT      |      |      |      |      | 0.63 | 0.56 |
| MARCKS    |      |      |      |      |      | 1.61 |
| MARK2     |      | 2.04 |      |      |      |      |
| MARVELD3  |      | 0.18 |      |      |      |      |
| MASP1     |      |      |      |      |      | 1.79 |
| MAT2B     |      |      |      |      |      | 1.74 |
| MATN2     |      |      | 0.17 |      |      |      |
| MAX       |      | 0.18 |      |      |      |      |
| MAZ       |      |      |      |      |      | 1.65 |
| MB        |      | 0.02 |      |      |      |      |
| MBD6      |      |      | 9.05 |      |      |      |
| MCCC2     |      |      | 0.25 |      |      | 1.89 |
| MCF2L     |      |      |      |      |      | 0.5  |
| MCFD2     |      |      |      |      |      | 1.74 |
| MCM7      |      |      | 3.32 |      |      |      |
| MCM8      |      |      |      |      |      | 1.69 |
| MCOLN3    |      |      |      |      |      | 2.6  |
| MDGA1     |      |      |      |      |      | 0.39 |
| MDH2      |      |      |      |      |      | 1.6  |
| MDM4      |      |      |      |      |      | 1.77 |

|        |      |       |      |      |      |      |
|--------|------|-------|------|------|------|------|
| ME2    |      |       |      |      |      | 2.14 |
| MECP2  |      |       |      |      |      | 0.59 |
| MED6   |      |       |      |      |      | 1.62 |
| MED8   |      |       | 0.37 |      |      | 2.17 |
| MEF2B  |      |       |      |      | 0.63 | 0.61 |
| MEF2C  |      |       |      |      |      | 1.79 |
| MELK   |      |       |      |      |      | 2.25 |
| METTL1 |      |       |      |      |      | 1.52 |
| METTL3 |      | 0.47  | 0.42 |      |      |      |
| MFAP3  |      |       |      |      |      | 1.54 |
| MFI2   |      |       |      |      |      | 4.1  |
| MGAT1  |      | 2.47  |      |      |      |      |
| MGAT4B |      |       | 5.09 |      |      |      |
| MGST2  |      | 0.39  | 0.34 |      |      | 0.6  |
| MIB1   |      |       |      |      |      | 1.74 |
| MICA   | 0.28 |       |      |      |      |      |
| MID2   |      | 0.12  |      |      |      |      |
| MIF    |      |       | 4.46 |      |      |      |
| MINA   |      |       |      |      |      | 1.68 |
| MKKS   | 0.48 |       | 0.41 |      |      |      |
| MKL2   |      |       |      |      |      | 0.61 |
| MKNK1  |      |       | 0.4  |      |      |      |
| MKNK2  |      |       | 0.43 |      |      | 0.57 |
| MKRN2  |      |       | 9.71 |      |      |      |
| MLF1   | 0.41 | 0.35  | 0.38 |      |      |      |
| MLF2   |      |       |      |      | 0.55 |      |
| MLH3   |      |       |      |      |      | 1.93 |
| MLL    |      |       |      |      | 0.46 | 0.59 |
| MLL5   |      | 0.61  |      |      |      |      |
| MLLT1  |      |       |      |      |      | 0.59 |
| MLLT10 |      |       |      | 1.64 |      | 2.03 |
| MLLT6  |      |       |      |      | 0.49 |      |
| MMP1   |      | 18.32 |      |      |      | 3.88 |
| MMP10  |      | 5.94  |      |      |      |      |
| MMP11  |      |       |      |      | 1.64 |      |
| MMP13  |      | 4.93  |      |      |      |      |
| MMP19  |      |       |      |      |      | 1.5  |
| MMP28  |      |       |      |      | 0.56 |      |
| MMP7   |      |       | 1.78 |      |      |      |
| MMRN2  |      |       |      |      | 0.55 | 0.54 |
| MNDA   |      |       |      | 1.95 |      | 3.8  |



|           |  |      |      |  |      |      |
|-----------|--|------|------|--|------|------|
| MOBP      |  |      |      |  |      | 2.19 |
| MOCOS     |  |      | 0.34 |  |      | 2.17 |
| MOCS2     |  |      |      |  |      | 2.72 |
| MORF4L1   |  |      |      |  |      | 2.7  |
| MOSPD1    |  |      |      |  |      | 2.09 |
| MPHOSPH10 |  |      |      |  |      | 1.9  |
| MPPE1     |  |      |      |  |      | 1.5  |
| MPV17     |  |      |      |  |      | 1.69 |
| MPZ       |  | 0.37 |      |  |      |      |
| MPZL1     |  |      |      |  |      | 2.07 |
| MR1       |  |      |      |  |      | 1.79 |
| MRC2      |  |      | 0.44 |  |      |      |
| MRGPRF    |  |      |      |  | 0.57 |      |
| MRP63     |  |      | 0.54 |  |      |      |
| MRPL13    |  |      |      |  |      | 1.84 |
| MRPL16    |  |      | 0.37 |  |      |      |
| MRPL17    |  |      |      |  |      | 2.3  |
| MRPL19    |  |      |      |  |      | 2.02 |
| MRPL28    |  |      |      |  |      | 1.65 |
| MRPL30    |  |      |      |  |      | 1.84 |
| MRPL32    |  |      |      |  |      | 1.78 |
| MRPL33    |  | 0.45 |      |  |      |      |
| MRPL35    |  |      |      |  |      | 2.08 |
| MRPL39    |  |      |      |  |      | 1.82 |
| MRPL42    |  |      |      |  |      | 2.01 |
| MRPL44    |  |      |      |  |      | 1.97 |
| MRPL45    |  |      | 5.73 |  |      |      |

|         |      |      |      |      |      |      |
|---------|------|------|------|------|------|------|
| MRPL46  | 0.45 | 0.53 |      |      |      |      |
| MRPS10  |      |      |      | 1.96 |      | 1.78 |
| MRPS14  | 0.38 | 0.27 |      |      |      | 1.68 |
| MRPS18B |      | 0.6  |      |      |      |      |
| MRPS22  |      | 0.51 |      |      |      |      |
| MRPS23  |      |      |      |      |      | 2.17 |
| MRPS24  | 0.37 | 0.35 | 0.49 |      |      |      |
| MRPS30  |      |      |      |      |      | 2.08 |
| MRPS33  |      |      |      |      |      | 1.97 |
| MRPS34  |      |      |      |      | 0.45 |      |
| MRS2L   |      |      |      |      |      | 2.37 |
| MS4A4A  |      |      | 0.23 |      |      | 3.76 |
| MS4A7   |      |      |      |      |      | 1.71 |
| MSH3    |      |      |      |      |      | 2.35 |
| MSI2    |      |      |      |      |      | 1.68 |
| MSLN    |      |      |      |      |      | 1.52 |
| MSMB    |      | 0.12 | 0.12 |      |      |      |
| MSTP9   | 2.97 |      |      |      |      |      |
| MTA1    |      |      |      |      | 0.54 |      |
| MTA3    | 0.32 |      |      |      |      |      |
| MTCH2   |      |      |      |      | 0.4  | 1.6  |
| MTM1    |      |      | 0.37 |      |      |      |
| MTMR1   |      |      | 3.51 | 1.57 |      |      |
| MTMR9   |      |      |      |      |      | 1.51 |

|        |      |      |      |      |      |      |
|--------|------|------|------|------|------|------|
| MTNR1B |      |      |      |      | 1.96 |      |
| MTPN   |      |      |      |      |      | 3.91 |
| MTRF1L |      |      |      |      |      | 1.73 |
| MTSS1  |      | 5.5  |      |      |      |      |
| MUC6   |      |      |      |      | 0.59 |      |
| MX2    | 0.34 | 0.35 |      |      |      | 2.08 |
| MXD3   |      |      |      |      |      | 2.27 |
| MYADM  |      |      |      |      | 0.49 |      |
| MYB    |      |      | 0.27 |      |      | 0.61 |
| MYBPC1 | 0.12 |      | 0.05 |      |      |      |
| MYC    |      |      |      |      | 0.41 |      |
| MYEF2  |      |      |      |      |      | 2.26 |
| MYH14  |      |      |      |      | 0.42 | 0.61 |
| MYH2   | 0.15 | 0.07 | 0.1  |      |      |      |
| MYH9   |      |      | 4.22 |      |      |      |
| MYLK   |      |      |      | 1.94 |      |      |
| MYO15A |      | 0.21 |      |      |      |      |
| MYO1B  |      | 3.49 |      |      |      |      |
| MYO5A  |      |      |      | 1.73 |      |      |
| MYOG   |      |      |      |      | 0.29 |      |
| MYOM2  |      | 0.52 |      |      |      |      |
| MYOM3  |      |      | 0.48 |      |      |      |
| MYST1  |      |      | 6.86 |      |      |      |
| MYST4  |      | 0.49 |      |      |      |      |

|         |      |      |      |     |      |      |
|---------|------|------|------|-----|------|------|
| NAB2    |      |      |      |     | 0.31 |      |
| NAGPA   |      |      |      |     |      | 1.78 |
| NANOG   |      |      |      | 0.5 |      | 0.43 |
| NANOS1  |      |      | 0.17 |     |      |      |
| NANS    |      |      |      |     |      | 2.29 |
| NAP1L4  |      | 4.14 |      |     |      |      |
| NAPG    |      |      |      |     |      | 1.99 |
| NASP    |      |      |      |     |      | 2.24 |
| NAV3    |      |      |      |     |      | 2    |
| NBL1    |      |      | 6.04 |     |      |      |
| NCBP2   |      |      |      |     |      | 2    |
| NCK2    |      |      |      |     |      | 1.59 |
| NCOR1   |      |      |      |     |      | 0.54 |
| NDFIP1  |      |      |      |     |      | 2.31 |
| NDOR1   |      |      |      |     | 0.47 |      |
| NDRG2   |      | 0.33 |      |     | 0.53 |      |
| NDUFA1  |      | 0.43 |      |     |      |      |
| NDUFA2  |      | 0.41 |      |     |      |      |
| NDUFA3  |      |      |      |     | 0.47 |      |
| NDUFA4  |      | 0.26 |      |     |      |      |
| NDUFA6  | 0.21 | 0.18 | 0.22 |     |      |      |
| NDUFA9  |      |      |      |     |      | 1.55 |
| NDUFB1  |      | 0.39 |      |     |      |      |
| NDUFB10 |      |      | 2.28 |     |      |      |

|         |      |      |      |      |      |      |
|---------|------|------|------|------|------|------|
| NDUFB2  | 0.66 | 0.61 | 0.66 |      |      |      |
| NDUFB4  |      |      | 1.83 |      |      |      |
| NDUFB5  |      |      |      |      |      | 2.25 |
| NDUFC2  |      |      |      |      |      | 0.47 |
| NDUFS2  |      | 0.43 |      |      |      |      |
| NDUFS6  |      |      | 1.96 |      |      |      |
| NDUFV1  |      |      | 2.02 |      |      |      |
| NEBL    |      |      | 0.3  |      |      | 0.63 |
| NEDD4L  |      |      |      | 1.97 |      | 4.45 |
| NEK1    |      |      |      | 1.81 |      |      |
| NEU2    |      |      | 2.93 |      |      |      |
| NEU3    |      | 0.21 |      |      |      |      |
| NEU4    |      |      |      |      | 1.5  | 1.74 |
| NEUROG1 |      |      |      |      | 0.54 |      |
| NEUROG3 |      |      |      |      |      | 1.69 |
| NF1     |      |      |      |      | 0.38 |      |
| NF2     |      | 1.7  |      |      |      |      |
| NFATC2  |      | 0.4  |      |      |      |      |
| NFE2L1  |      | 0.51 |      |      | 0.57 | 0.62 |
| NFE2L3  |      |      |      |      |      | 2.76 |
| NFIB    |      | 3.69 |      |      |      | 0.38 |
| NFIC    |      |      |      | 1.58 | 1.67 | 2.44 |
| NFKBIE  |      |      |      |      |      | 1.89 |
| NFKBIL1 |      |      |      |      |      | 1.81 |

|         |      |      |       |  |      |      |
|---------|------|------|-------|--|------|------|
| NFS1    |      |      | 0.34  |  |      |      |
| NFYA    |      |      |       |  |      | 1.53 |
| NIN     |      |      |       |  |      | 0.45 |
| NISCH   |      |      |       |  | 0.3  |      |
| NIT1    |      |      | 0.56  |  |      |      |
| NKG7    |      |      |       |  |      | 2.41 |
| NKIRAS2 |      |      |       |  |      | 1.7  |
| NKX2-8  |      |      |       |  |      | 1.95 |
| NLK     |      |      |       |  |      | 1.56 |
| NME4    | 5.46 |      | 2.03  |  |      |      |
| NME7    |      |      |       |  |      | 2.03 |
| NMI     |      |      | 2.14  |  |      |      |
| NMT1    | 0.49 |      |       |  |      | 1.55 |
| NMU     |      |      |       |  |      | 0.47 |
| NMUR1   |      |      |       |  | 0.31 |      |
| NNAT    |      |      | 14.43 |  |      |      |
| NOL5A   |      | 6.89 |       |  |      |      |
| NOLA2   | 0.66 |      |       |  |      |      |
| NOLA3   | 0.5  | 0.47 |       |  |      |      |
| NOLC1   |      |      |       |  |      | 2.3  |
| NOTCH2  |      | 0.36 | 0.46  |  |      |      |
| NOX4    |      |      |       |  |      | 3.02 |
| NPAS2   |      |      | 0.22  |  |      |      |
| NPL     |      |      |       |  |      | 3.06 |

|        |  |      |      |      |      |      |
|--------|--|------|------|------|------|------|
| NPM1   |  |      |      |      | 0.61 | 2.01 |
| NPR1   |  |      |      |      |      | 1.5  |
| NPR3   |  |      |      |      |      | 0.5  |
| NPTX1  |  |      |      |      |      | 0.63 |
| NPY1R  |  |      |      |      |      | 0.33 |
| NQO1   |  | 0.47 | 0.42 |      |      |      |
| NQO2   |  | 0.41 |      |      |      |      |
| NR1D1  |  |      |      |      |      | 0.51 |
| NR1H2  |  |      |      |      | 0.58 |      |
| NR2F6  |  |      | 2.09 |      |      |      |
| NR4A1  |  |      |      |      | 0.43 |      |
| NR4A3  |  |      |      |      | 1.88 | 4.67 |
| NRAS   |  |      |      |      |      | 2.6  |
| NRP2   |  |      |      |      |      | 1.78 |
| NT5C3  |  |      |      | 1.61 |      | 1.74 |
| NT5E   |  |      |      |      |      | 2.92 |
| NTF5   |  |      |      |      |      | 0.41 |
| NTN1   |  |      |      |      |      | 1.55 |
| NTRK1  |  | 0.4  |      |      |      |      |
| NTRK2  |  |      |      |      | 0.62 |      |
| NTRK3  |  |      | 2.57 |      |      |      |
| NTS    |  |      | 2.52 |      |      |      |
| NUCB2  |  |      |      |      |      | 2.19 |
| NUDT14 |  |      | 5.89 |      |      |      |

|         |      |      |      |     |      |      |
|---------|------|------|------|-----|------|------|
| NUDT6   |      |      |      |     |      | 1.54 |
| NUMBL   |      |      |      |     | 0.55 |      |
| NUP107  |      | 2.33 | 2.06 |     |      |      |
| NUP93   |      |      |      |     |      | 1.93 |
| NYX     |      |      |      |     | 0.57 |      |
| OAS3    |      |      |      |     |      | 2.88 |
| OGFR    |      |      |      |     | 0.48 |      |
| OGT     |      |      |      |     | 0.47 | 0.58 |
| OMG     |      | 0.05 | 0.16 |     |      |      |
| OPA1    |      |      |      |     |      | 3.68 |
| OPHN1   |      |      |      |     | 0.65 |      |
| OPN3    |      |      |      |     |      | 3.74 |
| OR10H2  |      |      |      |     | 0.39 |      |
| OR12D3  |      |      |      |     | 0.51 |      |
| ORC1L   |      |      |      | 1.5 |      | 2.11 |
| ORMDL2  | 0.41 |      | 0.45 |     |      |      |
| ORMDL3  |      |      |      |     |      | 0.61 |
| OSBPL2  |      |      |      |     | 0.59 | 0.51 |
| OSBPL6  |      |      |      |     |      | 0.61 |
| OSBPL9  |      |      |      |     |      | 2.09 |
| OSGEPL1 |      |      |      |     |      | 1.61 |
| OSTF1   |      |      | 0.52 |     |      |      |
| OSTM1   |      |      |      |     |      | 2.24 |
| OXR1    |      |      |      |     | 0.59 |      |



|        |      |      |       |  |      |      |
|--------|------|------|-------|--|------|------|
| OXT    |      |      |       |  | 0.38 |      |
| P2RX4  |      |      |       |  |      | 1.75 |
| P2RXL1 | 2.55 |      |       |  |      |      |
| P2RY6  |      |      |       |  |      | 1.61 |
| P4HB   |      |      | 3.18  |  |      |      |
| PA2G4  | 0.38 |      |       |  |      |      |
| PABPC1 |      |      | 8.99  |  |      | 0.66 |
| PABPC3 |      |      | 26.98 |  |      | 0.62 |
| PADI4  |      | 0.33 |       |  |      |      |
| PAIP2  |      |      |       |  |      | 2.12 |
| PANK1  |      | 0.41 |       |  |      |      |
| PANK2  |      |      |       |  |      | 1.86 |
| PANX1  |      |      |       |  |      | 2.76 |
| PANX3  |      |      |       |  | 0.6  |      |
| PAPLN  |      |      |       |  |      | 1.5  |
| PAQR6  |      |      |       |  | 0.58 | 0.66 |
| PARK7  |      |      |       |  |      | 1.59 |
| PARP1  |      |      |       |  |      | 1.75 |
| PARP8  |      |      |       |  |      | 1.83 |
| PARVA  |      |      | 3.46  |  |      |      |
| PARVB  |      | 0.46 | 0.38  |  | 0.53 |      |
| PASK   |      |      |       |  |      | 1.62 |
| PAX3   |      |      |       |  |      | 1.9  |
| PBEF1  |      |      |       |  |      | 5.08 |

|         |      |      |      |      |      |      |
|---------|------|------|------|------|------|------|
| PBX4    |      |      | 0.41 |      |      |      |
| PBXIP1  |      |      | 2.56 |      |      |      |
| PCAF    |      |      |      |      |      | 1.76 |
| PCCB    |      |      |      |      |      | 1.87 |
| PCDH11X |      |      |      |      | 1.57 |      |
| PCDH12  |      |      |      |      |      | 1.77 |
| PCMT1   |      |      |      |      |      | 2.31 |
| PCOLCE2 | 0.39 |      | 0.54 |      |      |      |
| PCSK6   |      | 0.35 | 0.37 |      |      |      |
| PCTK2   |      |      |      |      |      | 1.84 |
| PDCD4   |      |      |      |      | 0.54 |      |
| PDCD8   |      |      |      |      |      | 1.87 |
| PDE11A  |      |      |      |      |      | 0.37 |
| PDE2A   | 1.9  |      |      |      |      |      |
| PDE4DIP |      |      |      | 1.61 |      | 2.57 |
| PDE6D   |      |      |      |      |      | 2.12 |
| PDE7A   |      |      |      |      |      | 1.63 |
| PDGFC   |      |      |      |      | 1.5  |      |
| PDHA2   |      |      |      |      |      | 0.66 |
| PDK1    |      | 0.53 |      |      |      |      |
| PDK2    |      |      | 2.44 |      |      |      |
| PDPK1   |      |      |      | 1.68 |      |      |
| PELO    |      | 0.34 | 0.4  |      |      |      |
| PEPD    |      | 0.59 |      |      |      |      |

|        |      |      |      |      |      |      |
|--------|------|------|------|------|------|------|
| PERLD1 |      |      |      |      |      | 2    |
| PERP   |      |      |      |      |      | 0.54 |
| PEX11B | 0.49 |      | 0.37 |      |      |      |
| PFAS   |      |      | 6.95 |      |      |      |
| PFKFB1 |      |      |      |      | 1.5  |      |
| PFKFB4 |      |      |      |      |      | 2    |
| PGAM2  |      |      | 3.69 |      |      |      |
| PGK1   |      |      | 2.41 |      |      | 2.74 |
| PGM2   |      |      |      |      |      | 0.59 |
| PGM2L1 |      |      |      |      |      | 2.03 |
| PGRMC2 |      |      |      |      |      | 0.62 |
| PHC2   |      | 2.81 |      |      |      | 1.59 |
| PHCA   |      |      |      | 1.85 |      |      |
| PHF16  |      |      |      |      |      | 0.57 |
| PHF19  |      |      |      |      |      | 2.04 |
| PHF2   |      |      |      |      |      | 1.5  |
| PHKA2  |      |      | 0.42 |      |      |      |
| PHLDB1 |      |      | 2.71 |      |      |      |
| PHTF1  |      |      |      |      |      | 2.56 |
| PHTF2  |      |      |      |      |      | 1.63 |
| PHYHIP |      |      |      |      |      | 0.66 |
| PIAS2  |      |      |      |      | 0.66 |      |
| PIAS3  |      |      |      |      | 0.66 |      |
| PIGB   |      |      |      |      |      | 1.87 |

|         |      |      |      |      |      |      |
|---------|------|------|------|------|------|------|
| PIGF    |      |      |      |      |      | 1.73 |
| PIGL    |      |      | 2.76 |      |      |      |
| PIGR    |      |      |      |      | 0.59 |      |
| PIK3R3  |      |      |      | 2.03 |      | 2.46 |
| PILRB   |      |      | 0.57 |      |      |      |
| PINK1   |      | 0.4  | 0.28 |      |      |      |
| PIP5K2A |      |      |      |      |      | 2.02 |
| PIP5K2C |      |      |      |      | 0.58 |      |
| PIP5K3  | 3    |      |      |      |      |      |
| PITPNA  |      |      |      |      |      | 1.52 |
| PITPNC1 |      |      |      |      |      | 2.59 |
| PITX1   |      |      |      |      |      | 2.05 |
| PKIA    |      |      |      |      |      | 0.56 |
| PKN2    |      |      |      |      | 0.59 | 0.55 |
| PLA2G2E |      |      |      |      | 1.5  | 1.64 |
| PLA2G4B |      |      |      |      |      | 0.6  |
| PLA2G7  |      |      |      |      |      | 3.55 |
| PLAC8   |      |      |      |      |      | 3.37 |
| PLAG1   | 4.78 |      |      |      |      |      |
| PLCB1   |      |      |      |      |      | 1.5  |
| PLD1    |      |      |      | 0.63 |      | 0.66 |
| PLD3    |      | 4.78 | 4.91 |      |      |      |
| PLDN    |      | 2.45 |      |      |      |      |
| PLEC1   |      |      |      |      |      | 1.56 |

|         |      |      |      |      |      |      |
|---------|------|------|------|------|------|------|
| PLEK    |      |      |      |      |      | 3.39 |
| PLEKHA1 |      |      |      |      |      | 0.41 |
| PLEKHB2 |      |      |      |      |      | 2.42 |
| PLEKHC1 |      |      |      |      |      | 1.84 |
| PLEKHG1 |      | 0.19 |      |      |      |      |
| PLG     |      |      |      |      |      | 0.66 |
| PLOD3   |      |      |      |      |      | 0.63 |
| PLP1    |      |      |      |      |      | 2.42 |
| PLUNC   |      |      |      |      |      | 1.5  |
| PMCH    |      |      | 0.13 |      |      |      |
| PMCHL1  |      | 0.41 |      |      |      |      |
| PMFBP1  |      | 0.19 |      |      |      |      |
| PML     |      |      |      |      |      | 2.66 |
| PMM2    |      |      |      |      |      | 1.97 |
| PMS2L2  |      |      |      |      |      | 1.95 |
| PMS2L3  |      |      |      |      |      | 1.97 |
| PNPT1   |      |      |      |      |      | 2.72 |
| PNRC1   |      |      |      |      |      | 0.63 |
| PNRC2   |      | 1.78 |      |      |      |      |
| POFUT1  |      |      |      | 0.42 |      | 0.62 |
| POLDIP3 |      |      |      |      | 0.64 |      |
| POLE    |      |      | 2.95 |      | 0.54 |      |
| POLE2   | 3.06 |      |      |      |      |      |
| POLE4   |      |      |      |      |      | 2.46 |

|          |      |       |      |      |      |      |
|----------|------|-------|------|------|------|------|
| POLG     |      |       | 2.02 |      |      |      |
| POLR1D   |      | 0.49  |      |      |      |      |
| POLR2B   |      |       |      |      |      | 1.73 |
| POLR3K   |      |       |      |      |      | 1.67 |
| POLS     | 0.41 | 0.43  |      |      |      |      |
| PON2     |      |       |      |      |      | 2.52 |
| POP4     |      |       | 0.59 |      |      |      |
| POP7     |      | 0.49  |      |      |      |      |
| PORCN    |      |       |      |      | 0.6  |      |
| POSTN    |      | 14.42 |      |      |      |      |
| POU4F1   |      |       |      |      |      | 1.5  |
| PPARBP   |      |       |      | 1.7  |      |      |
| PPAT     |      |       |      | 2.27 |      | 1.68 |
| PPIB     |      |       | 3.07 |      |      |      |
| PPIE     |      |       |      |      |      | 1.77 |
| PPIF     |      |       | 3.27 |      |      |      |
| PPIL5    |      |       |      |      |      | 2.12 |
| PPL      |      |       |      |      | 0.62 |      |
| PPM1A    |      | 0.54  | 0.36 |      |      |      |
| PPM1E    | 3.76 |       |      |      |      |      |
| PPP1CA   |      | 1.8   |      |      |      |      |
| PPP1R11  |      |       |      |      | 0.55 | 1.81 |
| PPP1R13B |      | 0.47  | 0.39 |      |      |      |
| PPP1R14A |      |       | 8.17 |      |      |      |

|          |      |      |      |  |      |      |
|----------|------|------|------|--|------|------|
| PPP1R14D |      |      |      |  | 1.59 |      |
| PPP1R3B  | 0.43 |      | 0.45 |  |      |      |
| PPP1R3C  |      |      |      |  | 0.35 | 0.47 |
| PPP2CA   |      |      |      |  |      | 2.01 |
| PPP2R2C  |      |      |      |  |      | 0.55 |
| PPP2R5A  |      | 0.33 |      |  |      |      |
| PPP2R5C  |      |      |      |  |      | 2    |
| PPP3R1   |      |      |      |  |      | 1.5  |
| PPP5C    |      |      |      |  |      | 2.26 |
| PPT1     |      | 2.55 |      |  |      |      |
| PPT2     |      |      |      |  |      | 1.81 |
| PRAF2    |      |      |      |  | 0.57 |      |
| PRAME    |      |      |      |  |      | 4.45 |
| PRDM1    |      |      | 3.42 |  |      |      |
| PRDM2    |      |      | 0.14 |  |      |      |
| PRDX1    |      |      |      |  |      | 2.44 |
| PRDX3    |      |      |      |  | 0.5  | 3.09 |
| PRDX4    | 2.05 | 2.05 |      |  |      |      |
| PRDX5    |      |      | 4.03 |  |      |      |
| PRDX6    | 0.53 |      |      |  |      |      |
| PREI3    |      |      |      |  |      | 2.01 |
| PRELP    |      | 0.27 | 0.22 |  |      |      |
| PRG1     |      |      |      |  |      | 4.35 |
| PRG4     |      | 0.13 |      |  |      |      |

|         |      |      |       |      |  |      |
|---------|------|------|-------|------|--|------|
| PRIM1   |      |      |       |      |  | 1.55 |
| PRKACA  |      |      | 5.67  |      |  |      |
| PRKCBP1 |      |      |       |      |  | 1.5  |
| PRKCG   |      | 0.22 |       |      |  |      |
| PRKCH   |      |      |       |      |  | 1.51 |
| PRM1    |      |      |       | 0.57 |  | 0.66 |
| PRND    |      |      |       |      |  | 0.63 |
| PRNP    |      |      | 0.32  |      |  |      |
| PROCR   | 0.56 |      |       |      |  |      |
| PRODH   |      |      | 2.5   |      |  |      |
| PROP1   |      |      |       | 0.66 |  |      |
| PROS1   |      |      |       |      |  | 2.76 |
| PRPF4   | 4.03 |      | 3.35  |      |  |      |
| PRSS16  |      |      |       | 0.37 |  | 0.46 |
| PRSS22  |      | 6.11 |       |      |  |      |
| PRSS23  |      |      | 4.99  |      |  |      |
| PRX     |      |      |       |      |  | 1.71 |
| PSAP    |      |      | 10.88 |      |  |      |
| PSCD3   |      |      |       |      |  | 2.54 |
| PSCD4   |      |      |       | 1.71 |  | 3.03 |
| PSCDBP  |      |      |       |      |  | 2.08 |
| PSD4    |      |      | 9.27  |      |  |      |
| PSMA2   |      |      |       |      |  | 2.08 |
| PSMA4   |      |      |       | 1.71 |  | 3.14 |



|          |      |      |       |  |      |      |
|----------|------|------|-------|--|------|------|
| PSMA5    |      |      |       |  |      | 1.85 |
| PSMB8    |      |      | 34.74 |  |      | 2.48 |
| PSMC2    |      |      |       |  |      | 1.59 |
| PSMC6    |      |      |       |  |      | 2.19 |
| PSMD12   | 2.66 |      |       |  |      | 2.77 |
| PSMD14   |      |      |       |  |      | 2.17 |
| PSMD3    |      |      |       |  |      | 0.66 |
| PSMD4    |      |      |       |  |      | 1.64 |
| PSMD8    |      | 0.41 |       |  |      |      |
| PSME3    |      |      |       |  | 0.56 |      |
| PSMF1    |      |      | 2.87  |  |      |      |
| PSORS1C2 |      |      |       |  | 0.44 | 0.66 |
| PSTPIP1  |      |      |       |  |      | 1.71 |
| PTBP1    |      |      | 6.95  |  |      |      |
| PTGIS    |      |      |       |  |      | 0.4  |
| PTK2     |      |      |       |  |      | 1.59 |
| PTK2B    |      |      | 10.61 |  |      |      |
| PTMA     |      |      |       |  |      | 0.65 |
| PTOV1    |      |      | 10.51 |  |      |      |
| PTP4A2   |      |      |       |  |      | 2.78 |
| PTPLA    |      |      |       |  |      | 2.01 |
| PTPN2    |      |      |       |  |      | 2.52 |
| PTPN21   |      |      |       |  |      | 0.28 |
| PTPN4    |      |      |       |  |      | 1.69 |

|           |  |      |      |      |      |      |
|-----------|--|------|------|------|------|------|
| PTPN6     |  |      |      |      |      | 1.94 |
| PTPRC     |  |      |      |      |      | 3.98 |
| PTPRF     |  |      |      |      |      | 0.38 |
| PTPRN2    |  |      |      | 0.53 | 0.47 |      |
| PVR       |  | 2.98 |      |      |      |      |
| PWP2H     |  |      |      |      |      | 2.08 |
| QTRT1     |  |      | 4.62 |      |      |      |
| RAB11FIP1 |  | 0.64 |      |      |      |      |
| RAB14     |  |      |      | 2.2  |      | 0.64 |
| RAB1A     |  |      | 0.38 | 2.05 |      | 3.18 |
| RAB1B     |  |      | 4.39 |      |      | 1.5  |
| RAB2      |  |      |      |      |      | 2.28 |
| RAB26     |  | 0.29 |      |      |      |      |
| RAB27A    |  |      |      |      |      | 3.12 |
| RAB28     |  | 4.25 |      |      |      | 1.67 |
| RAB2B     |  |      |      |      |      | 1.5  |
| RAB31     |  |      |      | 1.76 |      | 3.11 |
| RAB32     |  |      |      |      |      | 2.32 |
| RAB3D     |  |      | 2.08 |      | 0.55 | 0.45 |
| RAB3IP    |  |      |      |      |      | 0.53 |
| RAB5C     |  |      |      |      |      | 1.88 |
| RAB6B     |  |      |      | 1.53 |      |      |
| RAB6C     |  | 3.22 |      |      |      |      |
| RABGAP1L  |  |      |      |      |      | 2.18 |

|          |      |      |      |      |      |      |
|----------|------|------|------|------|------|------|
| RABGEF1  |      |      |      |      |      | 1.84 |
| RABIF    |      |      |      |      |      | 1.73 |
| RABL3    |      |      |      |      |      | 1.68 |
| RAD17    |      |      |      |      |      | 2.12 |
| RAD50    |      |      |      |      |      | 1.9  |
| RAD51L1  |      |      |      |      |      | 1.53 |
| RAGE     |      |      | 5.37 |      |      |      |
| RALA     |      |      |      | 1.54 |      | 1.69 |
| RALBP1   |      | 0.24 |      |      |      | 0.51 |
| RALGDS   |      |      |      |      |      | 0.52 |
| RAN      |      |      |      |      |      | 2.87 |
| RANBP10  | 0.16 |      |      |      |      |      |
| RANBP2   |      |      |      | 1.82 |      |      |
| RAP1A    |      |      |      | 1.59 |      | 2.44 |
| RAP1GDS1 |      |      |      |      |      | 2.64 |
| RAPGEF1  |      |      |      |      | 0.52 |      |
| RAPGEF5  |      | 0.45 |      |      |      |      |
| RAPGEFL1 |      |      |      |      |      | 0.31 |
| RARA     |      |      |      |      | 0.45 |      |
| RARRES1  |      |      |      |      |      | 2.28 |
| RARRES2  |      |      | 3.12 |      |      |      |
| RASA2    | 2.84 |      |      |      |      |      |
| RASGRP3  |      |      |      |      |      | 1.79 |
| RASSF1   |      |      | 7.55 |      |      |      |

|         |      |      |      |      |      |      |
|---------|------|------|------|------|------|------|
| RASSF4  |      |      |      |      |      | 2.21 |
| RBBP4   |      |      | 3.27 |      |      | 2.38 |
| RBBP9   | 0.35 |      |      |      |      |      |
| RBL1    |      |      |      |      |      | 1.83 |
| RBM10   |      |      | 3.74 |      |      |      |
| RBM11   |      | 0.22 |      |      |      |      |
| RBM17   |      |      |      | 1.58 |      |      |
| RBM18   |      |      |      |      |      | 1.5  |
| RBM21   |      |      |      |      |      | 2.24 |
| RBM4    |      |      | 2.91 |      |      |      |
| RBMS1   |      |      |      |      |      | 2.96 |
| RBMS2   |      |      |      |      | 0.63 |      |
| RBMX2   |      |      |      |      |      | 2.74 |
| RBPSUHL | 3.67 |      |      |      |      |      |
| RCHY1   |      |      |      |      |      | 2.42 |
| RCL1    |      |      |      |      |      | 0.56 |
| RCOR3   |      |      |      |      |      | 1.64 |
| RDH13   |      |      | 0.43 |      |      |      |
| RDS     |      |      | 0.16 |      |      |      |
| RDX     |      |      |      |      |      | 2.6  |
| REC8L1  |      |      |      |      | 1.82 |      |
| RECQL   |      |      |      |      |      | 1.8  |
| REG1A   |      |      | 0.31 |      |      |      |
| REL     |      |      |      | 1.64 |      |      |

|         |      |      |      |      |  |      |
|---------|------|------|------|------|--|------|
| RFC4    |      | 1.91 |      |      |  | 2.35 |
| RFP2    |      |      |      |      |  | 0.56 |
| RFXAP   |      |      |      |      |  | 1.93 |
| RGMA    |      |      |      | 0.55 |  | 0.66 |
| RGS16   |      |      |      |      |  | 2.09 |
| RGS20   |      |      |      |      |  | 3.15 |
| RGS4    |      |      |      |      |  | 1.5  |
| RGS5    |      | 1.87 |      |      |  |      |
| RHBDL2  |      |      |      |      |  | 0.42 |
| RHEB    |      |      |      |      |  | 2.14 |
| RHO     |      |      |      | 0.42 |  | 0.58 |
| RHOBTB1 |      |      |      |      |  | 0.62 |
| RHOG    |      |      |      | 0.42 |  |      |
| RHOH    |      |      |      |      |  | 1.68 |
| RHOJ    |      |      |      |      |  | 1.7  |
| RILP    |      |      | 0.51 |      |  | 1.63 |
| RIMS4   |      |      |      |      |  | 1.5  |
| RIN2    |      |      |      | 0.62 |  |      |
| RIOK1   |      |      |      | 1.62 |  | 1.73 |
| RIPK2   |      |      |      |      |  | 2.47 |
| RIPK5   |      |      |      | 2.18 |  |      |
| RNASE6  |      |      |      |      |  | 2.1  |
| RNASEH1 | 0.38 | 0.44 | 0.45 |      |  | 1.96 |
| RNF10   | 2.4  |      |      |      |  |      |

|        |      |      |      |      |      |      |
|--------|------|------|------|------|------|------|
| RNF12  |      |      |      |      |      | 2.08 |
| RNF128 |      |      | 0.15 |      |      |      |
| RNF135 | 0.53 |      |      |      |      |      |
| RNF141 |      |      |      |      | 0.5  | 0.51 |
| RNF144 |      |      |      |      |      | 1.78 |
| RNF146 |      | 0.11 |      |      |      |      |
| RNF167 |      |      |      |      |      | 0.61 |
| RNF32  |      |      |      |      | 0.66 |      |
| RNF36  |      |      |      |      |      | 1.62 |
| RNF38  |      |      |      |      | 0.66 |      |
| RNF7   |      | 0.49 |      |      |      |      |
| ROBO2  |      |      |      | 1.63 |      |      |
| RPA3   | 0.43 |      |      |      |      |      |
| RPE    |      |      |      |      |      | 1.79 |
| RPGR   |      |      | 0.17 |      |      |      |
| RPH3A  |      |      |      |      | 0.65 |      |
| RPL10A |      |      |      |      |      | 0.59 |
| RPL11  |      | 0.46 |      |      |      | 0.61 |
| RPL14  | 0.39 | 0.36 |      |      | 0.64 | 0.55 |
| RPL19  |      |      |      | 0.52 |      |      |
| RPL22  |      |      |      |      |      | 0.55 |
| RPL24  |      |      |      |      |      | 0.52 |
| RPL28  |      |      |      |      | 0.57 |      |
| RPL31  |      |      |      |      |      | 0.56 |

|         |  |      |      |      |      |      |
|---------|--|------|------|------|------|------|
| RPL32   |  |      |      | 0.51 |      | 0.44 |
| RPL34   |  |      |      |      |      | 0.56 |
| RPL36   |  |      |      |      |      | 0.51 |
| RPL36AL |  |      | 2.48 |      |      |      |
| RPL7    |  |      |      |      | 0.62 | 0.57 |
| RPL9    |  | 0.29 |      |      | 0.59 | 0.65 |
| RPLP2   |  |      |      |      |      | 0.55 |
| RPP38   |  |      | 0.49 |      |      |      |
| RPS11   |  |      |      |      |      | 0.66 |
| RPS13   |  |      |      |      | 0.62 | 0.54 |
| RPS17   |  | 0.51 |      |      |      |      |
| RPS19   |  |      | 5.18 |      |      |      |
| RPS2    |  |      |      |      |      | 1.57 |
| RPS25   |  |      |      |      |      | 0.57 |
| RPS26   |  | 0.48 |      |      |      |      |
| RPS27   |  | 0.36 |      |      |      |      |
| RPS27A  |  |      |      |      |      | 0.58 |
| RPS28   |  |      |      |      |      | 0.61 |
| RPS29   |  |      |      |      |      | 0.57 |
| RPS5    |  |      | 9.68 |      |      |      |
| RPS6    |  |      |      |      |      | 0.5  |
| RPS6KA3 |  |      |      |      |      | 2.29 |
| RPS6KA4 |  |      | 2.2  |      |      |      |
| RPS6KA6 |  | 2.08 |      |      |      |      |

|         |      |      |       |      |     |      |
|---------|------|------|-------|------|-----|------|
| RPS6KC1 |      |      |       |      |     | 2.08 |
| RPS8    |      |      |       |      |     | 0.52 |
| RPS9    |      |      | 16.24 |      |     |      |
| RRAGA   |      | 0.47 | 0.34  |      |     |      |
| RRAGD   |      |      | 0.26  |      |     |      |
| RRAS    |      |      | 5.03  |      |     | 0.66 |
| RRAS2   |      |      |       |      |     | 1.57 |
| RRM1    |      | 1.62 |       |      |     |      |
| RRM2    |      |      |       |      |     | 3.53 |
| RTCD1   |      |      |       |      |     | 1.5  |
| RTN3    |      | 0.29 | 0.32  |      | 0.5 | 0.48 |
| RTN4IP1 |      |      |       |      |     | 1.66 |
| RTTN    |      |      |       |      |     | 1.65 |
| RUFY1   |      |      | 0.37  |      |     |      |
| RUNX1   | 2.82 | 3.25 |       |      |     | 0.62 |
| RUNX3   |      |      |       |      |     | 1.66 |
| RUSC1   |      |      |       |      |     | 1.5  |
| S100A13 |      |      | 1.81  |      |     |      |
| S100A8  |      |      |       |      |     | 2.07 |
| SAFB2   |      |      |       | 1.53 |     | 1.79 |
| SAMHD1  |      |      |       | 2.02 |     | 3.39 |
| SAMSN1  |      |      |       |      |     | 10.7 |
| SAP18   |      | 0.55 |       |      |     | 1.62 |
| SARDH   |      |      |       |      | 1.5 |      |



|         |      |      |       |      |      |      |
|---------|------|------|-------|------|------|------|
| SAT     |      |      |       |      |      | 2.65 |
| SBNO1   |      |      |       | 1.56 |      | 1.61 |
| SCAMP1  |      |      |       |      |      | 1.66 |
| SCARB2  |      |      |       |      |      | 3.36 |
| SCEL    |      |      |       |      |      | 0.44 |
| SCFD2   | 4.51 |      |       |      |      |      |
| SCGB1A1 |      |      |       |      | 0.56 |      |
| SCGB1D2 |      |      | 0.05  |      |      |      |
| SCGB2A1 |      | 0.07 | 0.18  |      |      |      |
| SCGB2A2 |      | 0.1  |       |      |      |      |
| SCGB3A2 |      |      |       |      | 0.57 |      |
| SCN1B   |      |      |       |      | 1.51 |      |
| SCN3B   |      |      |       |      |      | 0.58 |
| SCO1    |      |      |       |      |      | 2.25 |
| SCO2    |      |      | 10.76 |      |      |      |
| SCP2    |      |      |       |      | 0.57 |      |
| SCRN3   |      |      |       |      |      | 1.95 |
| SCRT1   |      |      |       |      |      | 1.83 |
| SCT     |      |      |       |      |      | 1.5  |
| SCYE1   |      |      |       |      |      | 1.73 |
| SDC2    |      | 5.09 |       |      |      |      |
| SDCBP   |      |      |       |      |      | 3.12 |
| SDCCAG8 |      |      |       |      |      | 1.56 |
| SDHB    |      |      |       |      |      | 1.59 |

|          |      |      |      |      |      |      |
|----------|------|------|------|------|------|------|
| SDK1     |      |      |      |      |      | 1.61 |
| SDSL     |      |      |      |      |      | 2.56 |
| SEC24A   | 2.16 |      |      |      |      |      |
| SEC31L1  |      |      |      |      |      | 0.56 |
| SECTM1   |      |      |      |      |      | 0.59 |
| SEL1L    |      |      |      | 1.61 |      |      |
| SEMA3B   |      |      |      |      |      | 1.9  |
| SEMA4A   |      |      |      |      | 0.57 |      |
| SEMA4F   |      |      |      |      |      | 1.83 |
| SEMA6A   |      |      |      |      |      | 3.81 |
| SENP8    |      |      |      |      |      | 1.6  |
| SEPHS2   |      |      | 1.57 |      |      |      |
| SEPW1    |      |      | 7.39 |      |      |      |
| SERPINA6 |      |      |      |      |      | 0.58 |
| SERPINB1 |      |      |      |      |      | 2.3  |
| SERPINB8 |      |      |      |      |      | 0.66 |
| SERPINB9 | 2.72 |      |      |      |      |      |
| SESTD1   |      |      |      |      |      | 2.05 |
| SF3A1    |      |      | 2.48 |      | 0.48 |      |
| SF3A2    |      |      | 2.06 |      | 0.41 |      |
| SF3B1    |      | 2.76 |      |      |      |      |
| SF3B3    |      |      |      |      |      | 0.62 |
| SFRS1    |      |      |      |      |      | 1.73 |
| SFRS12   |      |      | 0.4  |      |      |      |

|          |      |  |      |      |      |      |
|----------|------|--|------|------|------|------|
| SFRS7    |      |  |      |      | 0.56 |      |
| SFTPB    |      |  |      |      |      | 1.6  |
| SFTPC    |      |  |      |      | 0.63 |      |
| SFXN1    |      |  |      |      |      | 1.71 |
| SGCA     |      |  |      |      | 0.48 |      |
| SGCD     |      |  |      |      |      | 1.61 |
| SGK      |      |  |      |      |      | 2.33 |
| SGTB     |      |  |      |      |      | 1.65 |
| SH2D1A   |      |  |      |      |      | 2.42 |
| SH3BGRL2 |      |  |      | 1.67 |      |      |
| SH3RF2   |      |  |      |      |      | 0.66 |
| SHANK2   | 5.31 |  | 2.16 |      |      |      |
| SHB      |      |  |      |      |      | 1.87 |
| SHC1     |      |  |      |      |      | 3.25 |
| SHCBP1   |      |  |      |      |      | 2.77 |
| SIAH1    |      |  |      |      |      | 1.83 |
| SILV     |      |  | 15.3 |      |      |      |
| SIP1     |      |  |      |      |      | 1.62 |
| SIPA1    |      |  |      |      |      | 2.02 |
| SIPA1L3  |      |  |      |      |      | 0.56 |
| SIRT2    |      |  |      |      | 0.63 |      |
| SIRT5    |      |  |      |      | 0.66 |      |
| SIX4     |      |  |      | 0.5  |      |      |
| SLA2     |      |  |      |      | 1.5  | 1.68 |

|          |      |       |      |     |      |      |
|----------|------|-------|------|-----|------|------|
| SLAMF8   |      |       |      |     |      | 2.06 |
| SLC12A5  |      |       |      |     |      | 0.65 |
| SLC13A2  |      |       |      |     |      | 1.5  |
| SLC16A14 |      |       |      |     |      | 0.48 |
| SLC16A3  |      |       |      |     |      | 2.11 |
| SLC16A6  |      |       |      |     |      | 3.47 |
| SLC16A7  |      |       |      |     |      | 0.4  |
| SLC16A9  |      | 10.97 |      |     |      |      |
| SLC17A7  |      | 0.55  |      |     | 0.56 |      |
| SLC1A2   |      |       | 3.64 |     |      |      |
| SLC1A3   |      |       |      |     |      | 2.41 |
| SLC1A6   |      |       |      | 1.5 |      |      |
| SLC20A1  |      | 2.72  |      |     |      | 3.92 |
| SLC22A18 |      | 0.35  |      |     |      |      |
| SLC22A6  |      | 4.29  | 8.33 |     |      |      |
| SLC23A2  | 1.85 |       |      |     |      |      |
| SLC24A3  |      |       |      |     |      | 0.59 |
| SLC25A20 | 0.41 |       |      |     |      |      |
| SLC25A25 |      |       | 0.52 |     |      |      |
| SLC25A27 |      |       |      |     |      | 1.67 |
| SLC25A28 | 0.62 |       |      |     |      |      |
| SLC25A4  |      | 0.32  |      |     |      |      |
| SLC26A11 |      |       | 0.4  |     |      |      |
| SLC26A4  |      |       |      |     |      | 1.92 |

|          |      |  |      |      |      |      |
|----------|------|--|------|------|------|------|
| SLC26A7  |      |  |      |      |      | 0.53 |
| SLC2A1   |      |  |      |      |      | 0.55 |
| SLC2A3   |      |  |      |      |      | 1.63 |
| SLC2A4   |      |  |      |      |      | 0.63 |
| SLC2A4RG |      |  |      |      |      | 0.48 |
| SLC2A5   |      |  |      |      | 0.64 |      |
| SLC30A1  |      |  |      |      |      | 1.62 |
| SLC30A5  |      |  |      |      |      | 2.74 |
| SLC30A6  |      |  |      |      |      | 1.53 |
| SLC31A2  |      |  |      |      |      | 0.65 |
| SLC35B3  |      |  |      |      |      | 1.81 |
| SLC35F2  |      |  |      |      |      | 0.61 |
| SLC35F5  |      |  |      |      |      | 1.83 |
| SLC38A1  |      |  | 0.5  |      |      |      |
| SLC38A5  |      |  | 4.98 |      |      |      |
| SLC38A6  |      |  |      |      |      | 2.39 |
| SLC39A11 |      |  |      |      |      | 1.5  |
| SLC39A2  | 0.22 |  | 0.26 |      |      |      |
| SLC43A3  |      |  |      |      |      | 3.33 |
| SLC4A1AP | 1.82 |  |      |      |      |      |
| SLC5A10  |      |  |      |      |      | 0.63 |
| SLC6A6   |      |  |      | 0.49 |      |      |
| SLC7A11  |      |  | 0.33 |      |      |      |
| SLC7A7   |      |  |      |      |      | 1.82 |

|         |      |      |      |  |      |      |
|---------|------|------|------|--|------|------|
| SLC9A3  |      |      |      |  |      | 1.54 |
| SLCO2B1 |      |      |      |  |      | 2.12 |
| SLITRK6 |      |      |      |  |      | 0.41 |
| SLMAP   |      |      | 0.29 |  |      |      |
| SMAD1   |      |      |      |  |      | 0.55 |
| SMAD2   |      |      |      |  |      | 1.75 |
| SMARCA5 |      |      |      |  |      | 2.59 |
| SMARCC2 |      |      |      |  | 0.44 | 0.66 |
| SMARCE1 |      |      |      |  |      | 2.44 |
| SMOC1   |      |      |      |  | 0.66 |      |
| SMOX    |      |      |      |  | 0.5  |      |
| SMPD3   | 4.43 |      |      |  |      |      |
| SMS     |      |      | 2.14 |  |      | 2.48 |
| SMURF1  |      |      |      |  |      | 0.59 |
| SMYD3   |      |      | 3.95 |  |      | 1.9  |
| SNAPAP  | 0.6  |      |      |  |      |      |
| SNAPC2  |      |      | 3.12 |  |      |      |
| SNCA    |      |      |      |  |      | 3.04 |
| SNCG    |      |      |      |  |      | 1.51 |
| SNRP70  |      |      |      |  | 0.56 |      |
| SNRPB   |      |      | 5.59 |  |      |      |
| SNRPB2  |      | 1.89 |      |  |      |      |
| SNRPC   |      |      | 4.97 |  |      |      |
| SNRPD2  |      |      | 2.5  |  |      |      |

|       |  |      |      |      |      |      |
|-------|--|------|------|------|------|------|
| SNRPE |  |      | 1.82 |      |      |      |
| SNTA1 |  |      |      |      |      | 1.84 |
| SNX10 |  | 5.11 |      | 2.34 |      | 4.49 |
| SNX11 |  |      | 0.32 |      |      |      |
| SNX13 |  |      |      |      |      | 1.59 |
| SNX14 |  |      |      |      |      | 2.68 |
| SNX17 |  |      | 1.82 |      |      |      |
| SNX25 |  |      | 0.44 |      |      | 1.64 |
| SNX26 |  |      |      |      | 0.46 |      |
| SNX4  |  | 0.37 |      |      |      |      |
| SNX5  |  |      |      |      |      | 1.89 |
| SOCS1 |  |      |      |      | 0.48 |      |
| SOCS3 |  |      |      |      |      | 2.84 |
| SOD2  |  |      |      |      |      | 2.71 |
| SORT1 |  |      |      |      |      | 1.83 |
| SOX11 |  | 5.12 | 5.97 |      |      |      |
| SOX17 |  |      | 0.14 |      |      |      |
| SOX18 |  | 3.49 |      |      |      |      |
| SOX3  |  |      |      |      |      | 1.81 |
| SOX4  |  |      | 5.03 |      |      | 2.86 |
| SOX8  |  |      |      |      | 0.62 |      |
| SP100 |  |      |      |      |      | 1.99 |
| SP110 |  |      |      |      |      | 2.23 |
| SP2   |  |      |      |      | 0.57 |      |

|         |      |      |      |      |  |       |
|---------|------|------|------|------|--|-------|
| SPARC   |      | 3.45 | 3.41 |      |  |       |
| SPARCL1 |      |      | 0.16 |      |  |       |
| SPATA2  |      | 0.17 |      |      |  |       |
| SPDEF   |      |      |      |      |  | 1.5   |
| SPESP1  | 0.33 | 0.22 |      |      |  |       |
| SPINK1  |      |      |      |      |  | 0.61  |
| SPINK2  |      |      |      |      |  | 0.64  |
| SPN     |      |      |      | 0.43 |  |       |
| SPOP    |      |      | 6.69 |      |  | 0.51  |
| SPP1    |      |      |      |      |  | 16.43 |
| SPR     |      |      |      |      |  | 1.96  |
| SPRY1   |      |      | 0.36 |      |  |       |
| SPTBN2  |      |      |      | 0.41 |  |       |
| SPTLC2  |      |      |      |      |  | 2.76  |
| SRA1    |      |      |      |      |  | 1.91  |
| SRC     |      |      |      |      |  | 0.59  |
| SRCRB4D |      |      | 4.75 |      |  |       |
| SRD5A1  |      | 0.3  |      |      |  |       |
| SRP68   |      |      | 4.92 |      |  |       |
| SRP72   |      |      |      |      |  | 2.11  |
| SRP9    |      |      |      |      |  | 2.83  |
| SRPX    |      | 2.25 |      |      |  |       |
| SSBP1   |      |      |      |      |  | 0.44  |
| SSH3    |      |      |      |      |  | 0.66  |



|          |      |      |      |      |      |      |
|----------|------|------|------|------|------|------|
| SSNA1    |      |      |      |      |      | 2.01 |
| SSPN     |      | 5.49 |      |      |      |      |
| SSRP1    |      |      |      |      | 0.56 |      |
| SSTR1    |      |      |      |      |      | 0.6  |
| SSTR3    |      |      |      |      | 0.57 |      |
| SSX2IP   |      |      | 1.94 |      |      |      |
| ST13     |      |      |      |      | 0.46 |      |
| ST7      |      |      |      |      |      | 2.22 |
| STAG1    |      |      |      |      |      | 1.69 |
| STAG3    |      |      |      | 0.65 |      |      |
| STAR     |      |      |      |      |      | 0.32 |
| STARD10  |      |      | 3.44 |      | 0.63 |      |
| STARD3NL |      |      |      |      |      | 1.93 |
| STARD7   |      | 0.62 |      |      |      |      |
| STAT1    |      |      |      |      |      | 4.86 |
| STCH     |      |      |      |      |      | 2.42 |
| STK11IP  |      |      |      |      |      | 1.5  |
| STK17A   |      |      |      |      |      | 3.26 |
| STK31    |      |      |      |      |      | 0.66 |
| STK33    | 0.36 |      |      |      |      |      |
| STK38    |      | 3.24 | 4.6  |      |      | 1.57 |
| STK38L   | 4.49 | 3.39 | 17.6 |      |      |      |
| STK39    | 1.59 |      |      |      |      |      |
| STK4     |      |      |      | 2.09 |      |      |

|         |     |      |      |      |  |      |
|---------|-----|------|------|------|--|------|
| STMN1   |     | 3.22 |      |      |  |      |
| STOML2  |     |      | 2.86 |      |  |      |
| STRA13  |     | 0.52 |      |      |  |      |
| STRAP   |     |      |      |      |  | 2.5  |
| STRN3   |     | 2.15 |      |      |  |      |
| STRN4   |     |      |      | 0.55 |  |      |
| STX11   |     |      |      |      |  | 1.5  |
| STX18   |     |      |      |      |  | 1.57 |
| STX6    |     |      |      |      |  | 1.94 |
| STX7    |     |      |      |      |  | 2.13 |
| STXBP2  |     |      |      | 1.87 |  |      |
| SUFU    |     |      |      | 0.43 |  | 0.49 |
| SUGT1   |     | 0.59 |      | 1.64 |  | 2.14 |
| SUHW2   |     |      |      | 0.52 |  |      |
| SULF2   |     | 3.46 |      |      |  |      |
| SULT1A3 |     | 0.52 |      |      |  |      |
| SULT1C2 |     |      | 3.13 |      |  |      |
| SUMO1   |     | 3.35 |      |      |  |      |
| SUPT3H  |     |      |      |      |  | 2.66 |
| SUPT4H1 |     | 0.35 | 0.33 |      |  |      |
| SUPT5H  | 0.5 |      |      |      |  |      |
| SURF6   |     |      |      | 0.54 |  |      |
| SUV39H2 |     |      |      |      |  | 1.74 |
| SYAP1   |     |      |      | 1.55 |  | 1.68 |

|         |      |      |      |      |      |      |
|---------|------|------|------|------|------|------|
| SYCP1   |      | 3.26 |      |      |      |      |
| SYNCRIP | 1.93 |      |      |      |      |      |
| SYNE2   |      |      |      | 2.19 |      |      |
| SYNGR1  |      |      |      |      | 0.66 |      |
| SYNJ1   | 2.91 |      |      |      |      |      |
| SYNJ2BP |      |      |      |      |      | 1.52 |
| SYT12   |      |      |      |      |      | 1.72 |
| SYT7    |      |      | 2.9  |      |      |      |
| SYT9    |      |      |      |      | 0.43 |      |
| SYTL2   |      |      |      |      |      | 2.61 |
| TAC1    |      |      |      |      | 0.35 | 0.41 |
| TACC2   |      |      |      |      | 0.44 |      |
| TACSTD1 | 7.17 | 6.96 | 7.47 |      |      | 0.47 |
| TADA2L  |      |      |      |      |      | 2.02 |
| TAF12   | 0.36 | 0.41 |      |      |      |      |
| TAF1A   |      |      |      |      |      | 1.91 |
| TAF2    |      |      |      |      |      | 2.36 |
| TAF9    |      |      |      |      |      | 1.9  |
| TAGAP   |      |      |      |      |      | 2.53 |
| TAGLN   |      | 4.31 |      | 1.88 |      |      |
| TAL2    |      | 0.25 |      |      |      |      |
| TAP2    |      |      |      |      |      | 0.58 |
| TARBP2  |      |      |      |      |      | 1.71 |
| TAS2R1  |      |      | 0.21 |      |      |      |

|         |      |      |      |      |      |      |
|---------|------|------|------|------|------|------|
| TBC1D1  | 2.02 |      |      |      |      |      |
| TBC1D15 |      |      |      |      |      | 1.56 |
| TBC1D17 |      |      | 4.75 |      |      |      |
| TBC1D7  |      |      |      |      |      | 2.98 |
| TBX2    |      |      |      |      |      | 1.89 |
| TBX21   |      | 3.79 |      |      |      |      |
| TCAP    |      |      |      |      |      | 1.97 |
| TCF20   |      |      |      | 1.51 |      |      |
| TCF7L1  |      | 2.49 |      |      |      |      |
| TCN2    |      |      | 3.6  |      |      |      |
| TCP11   |      |      |      |      |      | 0.66 |
| TEAD3   |      |      |      |      | 0.53 |      |
| TECTA   |      |      |      | 0.49 |      |      |
| TEGT    |      |      |      |      |      | 2.22 |
| TEP1    |      |      |      |      |      | 1.51 |
| TESK2   |      |      | 0.56 |      |      |      |
| TEX11   |      |      |      |      | 1.5  |      |
| TEX261  |      |      |      |      | 0.46 |      |
| TFAP2B  |      |      |      |      |      | 0.43 |
| TFB1M   |      |      |      |      |      | 1.5  |
| TFB2M   |      |      |      |      |      | 3.09 |
| TFEC    |      |      |      |      |      | 3.3  |
| TGIF    | 2.72 |      |      |      |      |      |
| TGM2    |      |      | 2.73 |      |      | 1.57 |

|         |      |      |      |      |      |      |
|---------|------|------|------|------|------|------|
| THADA   |      |      | 0.31 |      |      |      |
| THAP8   |      | 0.32 |      |      |      |      |
| THBS1   |      |      |      |      |      | 1.73 |
| THBS3   |      |      |      |      |      | 0.61 |
| THRA    |      |      |      |      |      | 0.5  |
| THRAP1  |      |      |      |      |      | 1.5  |
| THRAP2  |      |      |      |      |      | 0.59 |
| THRAP4  |      |      |      |      |      | 0.58 |
| THRSP   |      | 0.33 | 0.24 |      |      |      |
| THSD1   |      |      | 2.13 |      |      |      |
| THUMPD1 |      |      |      | 1.65 |      |      |
| THUMPD2 |      |      | 0.11 |      |      |      |
| THUMPD3 |      |      | 0.31 |      |      | 1.76 |
| THY1    | 2.21 |      |      |      |      |      |
| TIAM1   |      |      |      |      | 0.52 |      |
| TICAM2  |      |      |      |      |      | 1.78 |
| TIGD7   |      | 6.06 |      |      |      |      |
| TIMM17A |      |      |      |      |      | 1.97 |
| TIMM8A  |      |      |      |      |      | 1.65 |
| TIMM8B  |      | 0.33 |      |      |      |      |
| TIMP2   |      |      |      |      |      | 2.5  |
| TLE4    |      |      |      |      | 0.51 |      |
| TLK1    |      |      |      |      |      | 2.29 |
| TLR2    |      |      |      |      |      | 2.17 |

|           |      |      |      |      |      |      |
|-----------|------|------|------|------|------|------|
| TLR3      | 0.23 | 0.31 | 0.29 |      |      |      |
| TLR4      |      |      |      |      |      | 2.22 |
| TLR7      |      |      |      |      |      | 3.26 |
| TLR8      |      |      |      |      |      | 3.3  |
| TM7SF3    |      |      |      |      |      | 2.15 |
| TM7SF4    |      |      |      |      |      | 1.95 |
| TM9SF2    |      |      |      |      |      | 2.05 |
| TMEM14A   |      |      |      |      |      | 2.52 |
| TMEM2     |      |      |      |      |      | 1.95 |
| TMEM25    |      |      |      |      |      | 0.46 |
| TMEM33    |      |      |      |      |      | 2.26 |
| TMEM5     |      |      |      | 1.5  |      | 1.63 |
| TMEM8     |      |      |      |      |      | 1.8  |
| TMLHE     |      | 0.12 |      |      |      |      |
| TMPO      |      |      |      |      |      | 2    |
| TMSB10    | 3.39 |      | 4.47 |      |      |      |
| TNFAIP6   |      |      |      | 1.51 |      | 3.24 |
| TNFRSF10B |      |      |      |      |      | 1.86 |
| TNFRSF19L |      |      |      |      | 0.44 |      |
| TNFRSF1B  |      |      |      |      |      | 1.5  |
| TNFRSF25  |      |      |      |      |      | 0.37 |
| TNFRSF6B  |      |      | 7.97 |      |      |      |
| TNFSF12   |      | 0.29 |      |      |      |      |
| TNFSF4    | 0.44 |      | 0.35 |      |      | 5.41 |

|          |      |      |       |  |      |      |
|----------|------|------|-------|--|------|------|
| TNNI3K   | 0.05 | 0.08 |       |  |      |      |
| TNNT3    |      |      | 4.66  |  |      |      |
| TNP1     |      |      |       |  | 0.54 | 0.64 |
| TNPO1    | 3.06 |      |       |  |      |      |
| TNXB     |      |      |       |  | 1.55 | 1.85 |
| TOMM7    |      | 0.45 |       |  |      |      |
| TP53BP1  |      |      |       |  |      | 1.73 |
| TP53I11  |      |      | 18.44 |  |      |      |
| TP53I3   |      |      |       |  |      | 1.85 |
| TP53INP2 |      | 0.41 |       |  |      |      |
| TP53RK   |      |      |       |  |      | 2.23 |
| TP73L    |      |      |       |  |      | 0.43 |
| TPCN1    |      |      |       |  |      | 2.52 |
| TP11     |      |      | 7.16  |  |      |      |
| TPM3     |      |      |       |  |      | 2.35 |
| TPM4     |      |      |       |  |      | 2.25 |
| TPMT     |      |      |       |  |      | 2.25 |
| TPSG1    |      |      |       |  | 0.61 | 0.6  |
| TRAF4    |      |      |       |  |      | 1.66 |
| TRAM2    |      |      |       |  |      | 1.79 |
| TRAPPC3  |      |      |       |  |      | 1.55 |
| TRAPPC6B |      |      |       |  |      | 1.5  |
| TREM2    |      |      |       |  |      | 2.91 |
| TREX1    |      |      |       |  |      | 2.02 |

|         |      |      |      |  |      |      |
|---------|------|------|------|--|------|------|
| TREX2   |      |      |      |  | 1.99 | 2.21 |
| TRIB1   |      |      |      |  |      | 1.91 |
| TRIB3   |      |      |      |  |      | 1.69 |
| TRIM22  |      |      |      |  |      | 2.18 |
| TRIM29  |      | 1.96 |      |  |      |      |
| TRIM35  |      |      |      |  |      | 1.55 |
| TRIM37  |      |      |      |  |      | 2.27 |
| TRIM38  |      |      |      |  |      | 2.3  |
| TRIM4   |      |      |      |  | 0.5  |      |
| TRIM45  |      | 0.33 |      |  |      |      |
| TRIM7   |      |      |      |  |      | 0.44 |
| TRNT1   |      | 4.01 |      |  |      | 1.94 |
| TRPC4AP |      | 1.98 |      |  |      |      |
| TRPM3   |      |      |      |  |      | 1.64 |
| TRPV2   |      |      |      |  |      | 1.96 |
| TRPV5   |      | 4.75 | 9.66 |  |      |      |
| TRUB1   |      |      |      |  |      | 0.62 |
| TRUB2   |      | 0.3  |      |  |      |      |
| TSCOT   |      | 0.12 | 0.25 |  |      |      |
| TSFM    | 0.49 | 0.42 | 0.44 |  |      |      |
| TSGA14  |      |      |      |  |      | 2.01 |
| TSGA2   |      |      |      |  |      | 0.45 |
| TSNAX   |      |      |      |  |      | 2.46 |
| TST     | 0.27 |      | 0.25 |  |      |      |



|         |      |      |      |     |      |      |
|---------|------|------|------|-----|------|------|
| TTC1    | 0.56 | 0.64 | 0.57 |     |      | 1.8  |
| TTC19   |      | 1.5  |      |     |      |      |
| TTC8    |      |      |      |     |      | 1.63 |
| TTK     |      |      |      |     |      | 1.81 |
| TLL1    |      |      |      | 1.5 |      |      |
| TTR     |      |      |      |     | 0.61 | 0.66 |
| TTY1    |      |      |      |     | 2.05 |      |
| TTYH3   |      |      |      |     | 0.61 |      |
| TUBGCP3 |      |      |      |     |      | 1.62 |
| TUSC4   |      | 2.09 |      |     |      |      |
| TXN     |      | 0.33 |      |     |      |      |
| TXNDC4  |      |      |      |     |      | 2.26 |
| TXNDC9  |      |      |      |     |      | 2.43 |
| TXNL4B  |      |      |      |     |      | 2.34 |
| TXNL5   |      |      | 2.02 |     |      |      |
| TYR     |      |      |      |     |      | 3.12 |
| TYRP1   |      | 0.31 |      |     |      |      |
| UAP1    |      |      |      |     |      | 3    |
| UBADC1  |      |      |      |     |      | 0.6  |
| UBAP2   |      |      | 0.48 |     |      |      |
| UBASH3A |      |      |      |     |      | 1.96 |
| UBD     |      |      |      |     |      | 2.57 |
| UBE2C   |      |      | 3.18 |     |      |      |
| UBE2G1  |      |      |      |     | 0.58 | 1.73 |

|        |      |      |       |      |      |      |
|--------|------|------|-------|------|------|------|
| UBE2G2 |      |      |       |      |      | 0.61 |
| UBE2J1 |      |      |       |      | 0.59 |      |
| UBE2L6 |      |      |       |      |      | 1.85 |
| UBE2R2 |      |      |       |      | 0.63 |      |
| UBE2S  |      | 2.67 | 18.43 |      |      | 1.57 |
| UBE2V2 |      |      |       |      |      | 2.04 |
| UBQLN1 |      | 0.24 |       |      |      | 0.64 |
| UBQLN3 |      |      |       |      | 0.58 | 0.66 |
| UBR1   |      |      |       |      |      | 1.63 |
| UBTD1  |      | 0.25 | 0.28  |      |      |      |
| UBXD4  |      | 2.39 |       |      |      |      |
| UCHL5  |      |      |       |      |      | 2.72 |
| UCN3   |      |      |       |      | 0.62 |      |
| UCP2   |      |      | 6.66  |      |      | 2.65 |
| UGCG   |      |      |       | 2.68 |      |      |
| UGCGL1 |      |      |       |      |      | 2.45 |
| UGCGL2 |      |      |       |      |      | 1.5  |
| UGP2   |      | 3.56 |       |      |      |      |
| UGT2B4 |      |      |       |      |      | 0.66 |
| ULBP2  |      |      |       |      |      | 2.09 |
| UNC50  |      |      |       |      |      | 1.92 |
| UPF2   | 0.54 |      |       |      |      |      |
| UPF3B  |      |      |       |      |      | 1.69 |
| UPP1   |      |      | 3.65  |      |      | 2.78 |

|        |      |      |      |      |      |      |
|--------|------|------|------|------|------|------|
| UROD   |      |      | 9    |      |      |      |
| USH2A  |      |      |      | 0.61 |      |      |
| USH3A  |      | 1.81 |      |      |      |      |
| USHBP1 |      |      |      |      |      | 1.73 |
| USP13  |      | 0.5  |      | 1.51 |      | 3.12 |
| USP14  |      |      |      |      |      | 2.66 |
| USP18  |      |      |      |      |      | 2.27 |
| USP34  |      |      |      |      |      | 1.66 |
| USP48  |      |      |      | 2.14 |      | 2.16 |
| USP49  | 2.06 |      |      |      |      |      |
| USP52  | 0.19 |      |      |      |      |      |
| USP8   |      |      |      |      |      | 2.28 |
| UXS1   |      |      | 2.01 |      |      |      |
| VAPA   |      | 5.48 |      |      |      |      |
| VAV1   |      |      |      |      |      | 2.25 |
| VAV3   |      |      |      |      |      | 0.31 |
| VBP1   |      |      |      |      |      | 2.79 |
| VCY    |      |      | 3.03 |      |      |      |
| VDAC3  |      |      |      |      |      | 1.99 |
| VEGFB  |      |      | 1.75 |      |      |      |
| VIPR1  |      |      |      |      |      | 0.66 |
| VIPR2  |      |      |      |      | 1.55 |      |
| VNN2   |      |      |      |      |      | 2.95 |
| VNN3   |      |      |      |      |      | 1.5  |

|         |  |      |      |      |      |      |
|---------|--|------|------|------|------|------|
| VPS13C  |  | 3.64 |      |      |      |      |
| VPS29   |  |      |      |      |      | 1.68 |
| VPS33B  |  |      |      |      |      | 1.83 |
| WAC     |  |      |      | 1.84 |      |      |
| WARS    |  |      |      |      |      | 2.12 |
| WASPIP  |  |      |      |      |      | 3.21 |
| WBP5    |  |      |      |      |      | 3.53 |
| WDFY3   |  |      |      |      |      | 1.76 |
| WDHD1   |  |      |      |      |      | 1.52 |
| WDR12   |  |      |      |      |      | 2.03 |
| WDR13   |  |      | 0.55 |      |      |      |
| WDR26   |  |      |      |      |      | 1.76 |
| WDR31   |  |      |      |      |      | 1.6  |
| WDR35   |  | 6.01 |      |      |      | 1.5  |
| WDR4    |  | 3.18 |      |      |      |      |
| WHSC1L1 |  |      |      | 1.85 |      |      |
| WNT10A  |  |      |      |      |      | 0.54 |
| WNT11   |  |      |      |      | 0.56 |      |
| WNT16   |  |      | 0.25 |      |      | 0.33 |
| WNT2B   |  |      |      |      |      | 0.55 |
| WNT3    |  |      |      |      |      | 0.29 |
| WNT4    |  |      |      |      |      | 0.29 |
| WRB     |  |      |      |      |      | 1.97 |
| WTAP    |  |      |      |      |      | 2    |

|         |      |      |      |  |      |      |
|---------|------|------|------|--|------|------|
| WWP1    |      |      | 0.39 |  |      |      |
| WWP2    |      |      |      |  |      | 1.5  |
| XCR1    |      |      |      |  | 0.52 |      |
| XPC     |      |      |      |  |      | 1.6  |
| XPO1    |      | 1.87 |      |  |      |      |
| XPO5    |      |      |      |  |      | 1.74 |
| XRCC4   |      |      |      |  |      | 2.02 |
| YAF2    |      | 3.69 |      |  |      | 1.73 |
| YWHAZ   |      |      |      |  |      | 0.64 |
| ZBTB24  |      |      |      |  |      | 2.34 |
| ZBTB5   |      |      |      |  | 0.66 |      |
| ZCCHC4  |      |      | 0.33 |  |      | 0.62 |
| ZDHHC4  |      |      | 3.58 |  |      |      |
| ZDHHC9  |      |      | 0.34 |  |      |      |
| ZFP64   |      |      |      |  |      | 0.6  |
| ZFP95   |      |      |      |  |      | 2.02 |
| ZFYVE16 |      |      |      |  |      | 1.84 |
| ZFYVE21 |      |      | 0.42 |  |      |      |
| ZFYVE26 |      |      |      |  |      | 0.64 |
| ZFYVE9  |      |      |      |  | 0.51 | 0.54 |
| ZIM3    |      |      | 0.26 |  |      |      |
| ZMYM1   |      |      |      |  | 0.65 |      |
| ZMYND10 | 3.66 |      |      |  |      |      |
| ZNF140  |      |      |      |  |      | 1.93 |

|         |      |      |      |      |      |      |
|---------|------|------|------|------|------|------|
| ZNF185  |      |      |      |      |      | 0.55 |
| ZNF193  |      | 3.24 |      |      |      |      |
| ZNF225  |      |      | 7.89 |      |      |      |
| ZNF23   |      |      |      |      |      | 1.66 |
| ZNF232  |      | 0.43 |      |      |      |      |
| ZNF235  |      |      |      |      |      | 1.57 |
| ZNF26   |      |      |      |      |      | 2.05 |
| ZNF267  |      |      |      |      |      | 2.51 |
| ZNF277  |      |      | 0.36 |      |      |      |
| ZNF278  |      |      |      |      | 0.37 |      |
| ZNF281  |      |      |      |      |      | 2.1  |
| ZNF324  |      |      |      |      | 0.66 |      |
| ZNF330  |      |      |      |      |      | 1.77 |
| ZNF334  |      |      |      |      | 0.66 |      |
| ZNF350  |      |      | 0.26 |      |      |      |
| ZNF354A |      |      |      | 1.64 |      |      |
| ZNF364  |      |      |      |      |      | 2.06 |
| ZNF37A  |      |      |      |      |      | 1.85 |
| ZNF385  |      |      |      |      | 0.6  |      |
| ZNF394  |      | 0.59 |      |      |      |      |
| ZNF395  |      |      |      |      |      | 0.44 |
| ZNF403  |      |      |      |      | 0.46 |      |
| ZNF406  | 0.43 | 0.34 |      |      |      |      |
| ZNF408  |      |      |      |      | 1.5  | 1.87 |

|         |      |      |      |      |  |      |
|---------|------|------|------|------|--|------|
| ZNF432  |      |      | 0.47 |      |  |      |
| ZNF435  |      | 2.71 |      |      |  | 1.56 |
| ZNF45   |      |      |      |      |  | 1.93 |
| ZNF451  |      |      |      |      |  | 1.51 |
| ZNF510  |      |      | 0.28 |      |  |      |
| ZNF516  |      |      |      |      |  | 0.49 |
| ZNF550  |      |      |      |      |  | 0.58 |
| ZNF553  |      | 2.07 |      |      |  |      |
| ZNF557  |      |      | 0.31 |      |  |      |
| ZNF577  |      |      |      |      |  | 0.38 |
| ZNF585A |      |      |      | 1.57 |  |      |
| ZNF75   |      |      |      |      |  | 0.6  |
| ZNF8    | 2.93 |      |      |      |  |      |
| ZNFN1A1 |      |      |      |      |  | 2.64 |
| ZP4     |      |      |      |      |  | 1.83 |
| ZRF1    |      |      |      |      |  | 1.73 |
| ZZZ3    |      |      |      |      |  | 1.96 |
