# Supplementary material for: A Comparative Study of Gene-Expression Data of Basal Cell Carcinoma and Melanoma Reveals New Insights about the Two Cancers
Source: PubMed Central journal article supplement (PMC3266277; doi:10.1371/journal.pone.0030750), 2012-01-25
Supplement: pone.0030750.s007.pdf [file pone.0030750.s007.pdf]

|                                                                 |   |   |   |   |    |    |    |  |  |  |  |  |  |
|-----------------------------------------------------------------|---|---|---|---|----|----|----|--|--|--|--|--|--|
| hsa05216:Thyroid cancer                                         |   |   |   |   |    | 6  |    |  |  |  |  |  |  |
| hsa05218:Melanoma                                               |   |   | 6 | 8 | 6  | 9  |    |  |  |  |  |  |  |
| hsa05219:Bladder cancer                                         |   |   | 5 | 6 | 8  | 10 | 7  |  |  |  |  |  |  |
| hsa05220:Chronic myeloid leukemia                               |   | 6 |   | 6 |    | 8  | 11 |  |  |  |  |  |  |
| hsa05221:Acute myeloid leukemia                                 |   | 5 |   |   |    |    | 9  |  |  |  |  |  |  |
| hsa05222:Small cell lung cancer                                 | 5 |   |   | 8 | 11 | 14 | 17 |  |  |  |  |  |  |
| hsa05223:Non-small cell lung cancer                             |   |   |   |   | 5  | 7  | 7  |  |  |  |  |  |  |
| hsa05410:Hypertrophic cardiomyopathy (HCM)                      | 8 |   |   | 7 |    | 11 | 15 |  |  |  |  |  |  |
| hsa05412:Arrhythmogenic right ventricular cardiomyopathy (ARVC) | 5 |   |   | 6 | 8  | 10 | 19 |  |  |  |  |  |  |
