# Supplementary material for: A Comparative Study of Gene-Expression Data of Basal Cell Carcinoma and Melanoma Reveals New Insights about the Two Cancers
Source: PubMed Central journal article supplement (PMC3266277; doi:10.1371/journal.pone.0030750), 2012-01-25
Supplement: pone.0030750.s008.pdf [file pone.0030750.s008.pdf]

Table S3 (a). The top 1-gene signature for the melanoma. (The 2<sup>nd</sup> and 3<sup>rd</sup> column represent the classification accuracy of the gene signature in the training set and independent testing set. The 4<sup>th</sup> and 5<sup>th</sup> column represent the prediction result of the urine-secretory [marked by \*] and blood-secretory [marked by \*\*] )

| Melanoma 1-gene signatures |                   |                  |       |       |
|----------------------------|-------------------|------------------|-------|-------|
| genes                      | training accuracy | testing accuracy | urine | blood |
| OAS3                       | 82.93%            | 71.43%           |       | **    |
| RALBP1                     | 82.93%            | 71.43%           |       |       |
| GLA                        | 80.49%            | 71.43%           |       |       |
| LLGL1                      | 80.49%            | 71.43%           |       |       |
| SERPINA6                   | 80.49%            | 71.43%           |       | **    |
| APCS                       | 78.05%            | 71.43%           |       | **    |
| CD36                       | 78.05%            | 71.43%           |       |       |
| CYP4B1                     | 78.05%            | 71.43%           |       |       |
| EXO1                       | 78.05%            | 71.43%           |       |       |
| GDPD2                      | 78.05%            | 71.43%           |       |       |
| HOXD9                      | 78.05%            | 71.43%           |       |       |
| HSPE1                      | 78.05%            | 71.43%           |       |       |
| KBTBD2                     | 78.05%            | 71.43%           |       |       |
| PIGR                       | 78.05%            | 71.43%           |       |       |
| SCEL                       | 78.05%            | 71.43%           |       |       |
| TP53I3                     | 78.05%            | 71.43%           |       |       |
| ALDH3A2                    | 75.61%            | 71.43%           |       |       |
| ARL4A                      | 75.61%            | 71.43%           |       |       |
| ATP1A2                     | 75.61%            | 69.84%           |       |       |
| BCL6                       | 75.61%            | 71.43%           |       |       |
| CD207                      | 75.61%            | 71.43%           |       |       |
| DLGAP1                     | 75.61%            | 71.43%           |       |       |
| GATM                       | 75.61%            | 69.84%           |       |       |
| HAGH                       | 75.61%            | 71.43%           |       |       |
| HSPA4                      | 75.61%            | 71.43%           |       |       |
| IFI44                      | 75.61%            | 71.43%           |       |       |
| MECP2                      | 75.61%            | 71.43%           |       |       |
| MNDA                       | 75.61%            | 71.43%           |       |       |
| NOX4                       | 75.61%            | 71.43%           |       |       |
| PHTF1                      | 75.61%            | 71.43%           |       |       |
| PKIA                       | 75.61%            | 71.43%           |       |       |
| RGS20                      | 75.61%            | 71.43%           |       |       |
| SLC16A6                    | 75.61%            | 71.43%           |       |       |
| STAR                       | 75.61%            | 76.19%           |       | **    |

|          |        |        |   |    |
|----------|--------|--------|---|----|
| TNP1     | 75.61% | 71.43% |   |    |
| WNT4     | 75.61% | 71.43% |   | ** |
| COX7C    | 75.61% | 71.43% |   |    |
| RPL34    | 73.17% | 77.78% |   |    |
| AASDHPPT | 73.17% | 71.43% |   |    |
| BEX1     | 73.17% | 71.43% |   |    |
| BRAP     | 73.17% | 71.43% |   |    |
| CCL18    | 73.17% | 71.43% | * | ** |
| FCGR2A   | 73.17% | 71.43% |   |    |
| HEXB     | 73.17% | 71.43% | * |    |
| HMGB1    | 73.17% | 71.43% |   | ** |
| IFI30    | 73.17% | 71.43% | * |    |
| IVL      | 73.17% | 71.43% |   |    |
| MAGEC2   | 73.17% | 71.43% |   |    |
| NT5E     | 73.17% | 71.43% |   |    |
| PGLYRP4  | 73.17% | 71.43% |   | ** |
| RAD1     | 73.17% | 71.43% |   | ** |
| RNF141   | 73.17% | 71.43% |   |    |
| RUNX3    | 73.17% | 71.43% |   |    |
| SRC      | 73.17% | 71.43% |   |    |
| STC1     | 73.17% | 71.43% | * | ** |
| STK24    | 73.17% | 71.43% |   |    |
| TCP11    | 73.17% | 71.43% |   |    |
| TFAP2B   | 73.17% | 71.43% |   |    |
| YWHAB    | 73.17% | 71.43% |   |    |

Table S3 (b). The top 2-gene signature for the melanoma. (The 2<sup>nd</sup> and 3<sup>rd</sup> column represent the classification accuracy of the gene signature in the training set and independent testing set. The 4<sup>th</sup> and 5<sup>th</sup> column represent the prediction result of the urine-secretory [marked by \*] and blood-secretory [marked by \*\*] )

| Melanoma 2-gene signatures |                   |                  |       |       |
|----------------------------|-------------------|------------------|-------|-------|
| genes                      | training accuracy | testing accuracy | urine | blood |
| GLA_HSPE1                  | 95.12%            | 71.43%           |       |       |
| GLA_IL13                   | 95.12%            | 71.43%           |       |       |
| GLA_KBTBD2                 | 95.12%            | 71.43%           |       |       |
| GLA_LLGL1                  | 95.12%            | 71.43%           |       |       |
| SERPINA6_VAPA              | 95.12%            | 71.43%           |       |       |
| DSP_GLA                    | 92.68%            | 87.30%           |       |       |
| DSP_IFITM2                 | 92.68%            | 80.95%           |       |       |

|                |        |        |  |    |
|----------------|--------|--------|--|----|
| APCS_LGALS1    | 92.68% | 76.19% |  | ** |
| LGALS1_LLGL1   | 92.68% | 76.19% |  |    |
| LLGL1_RNF141   | 92.68% | 76.19% |  |    |
| CLU_GLA        | 92.68% | 71.43% |  |    |
| DDB2_IFITM2    | 92.68% | 71.43% |  |    |
| DNM1_IFITM2    | 92.68% | 71.43% |  |    |
| EPB41L1_GLA    | 92.68% | 71.43% |  |    |
| FABP1_GLA      | 92.68% | 71.43% |  |    |
| GLA_HRSP12     | 92.68% | 71.43% |  |    |
| GLA_HSPA1L     | 92.68% | 71.43% |  |    |
| GLA_KCNJ15     | 92.68% | 71.43% |  |    |
| GLA_MECP2      | 92.68% | 71.43% |  |    |
| GLA_METAP1     | 92.68% | 71.43% |  |    |
| GLA_PIGR       | 92.68% | 71.43% |  |    |
| GLA_PNLIP      | 92.68% | 71.43% |  |    |
| GLA_SERPINB7   | 92.68% | 71.43% |  |    |
| GLA_TTR        | 92.68% | 71.43% |  |    |
| HOXD9_RUNX3    | 92.68% | 71.43% |  |    |
| IFITM2_TBL2    | 92.68% | 71.43% |  |    |
| PANX1_RUNX3    | 92.68% | 71.43% |  |    |
| PMM2_RUNX3     | 92.68% | 71.43% |  |    |
| RUNX3_WISP3    | 92.68% | 71.43% |  |    |
| CAPNS1_NOX4    | 90.24% | 82.54% |  |    |
| CAPNS1_MAGEC2  | 90.24% | 79.37% |  |    |
| GLA_IMPA2      | 90.24% | 77.78% |  |    |
| HSPE1_LGALS1   | 90.24% | 76.19% |  |    |
| KBTBD2_PLAC8   | 90.24% | 76.19% |  |    |
| APCS_PAK6      | 90.24% | 74.60% |  |    |
| GLA_GPRASP1    | 90.24% | 74.60% |  |    |
| GLA_STK39      | 90.24% | 74.60% |  |    |
| HSPE1_PKIA     | 90.24% | 74.60% |  |    |
| KBTBD2_LGALS1  | 90.24% | 74.60% |  |    |
| LGALS1_SRC     | 90.24% | 74.60% |  |    |
| GLA_RFX2       | 90.24% | 73.02% |  |    |
| HSPE1_PLAC8    | 90.24% | 73.02% |  |    |
| HSPE1_TP53I3   | 90.24% | 73.02% |  |    |
| IVL_SLC10A3    | 90.24% | 73.02% |  |    |
| LLGL1_TP53I3   | 90.24% | 73.02% |  |    |
| ADAM17_GATM    | 90.24% | 71.43% |  |    |
| ANXA5_APCS     | 90.24% | 71.43% |  |    |
| APCS{EIF4ENIF1 | 90.24% | 71.43% |  |    |

|                   |        |        |  |    |
|-------------------|--------|--------|--|----|
| APCS_HLA-DMA      | 90.24% | 71.43% |  |    |
| APCS_IKBKE        | 90.24% | 71.43% |  |    |
| APCS_LAMC1        | 90.24% | 71.43% |  | ** |
| APCS_NKG7         | 90.24% | 71.43% |  |    |
| APCS_OAS3         | 90.24% | 71.43% |  | ** |
| APCS_PSME1        | 90.24% | 71.43% |  |    |
| APOL6_GATM        | 90.24% | 71.43% |  |    |
| AQP6_STAR         | 90.24% | 71.43% |  |    |
| ARL4A_S100A9      | 90.24% | 71.43% |  |    |
| ATP5H_RUNX3       | 90.24% | 71.43% |  |    |
| BEX1_GJB5         | 90.24% | 71.43% |  |    |
| C11orf24_MNDA     | 90.24% | 71.43% |  |    |
| C12orf5_SQLE      | 90.24% | 71.43% |  |    |
| CBFA2T2_EIF4ENIF1 | 90.24% | 71.43% |  |    |
| CDK4_GLA          | 90.24% | 71.43% |  |    |
| CHST11_SCEL       | 90.24% | 71.43% |  |    |
| CKS2_GLA          | 90.24% | 71.43% |  |    |
| COL17A1_GLA       | 90.24% | 71.43% |  |    |
| COX7C_CYP4B1      | 90.24% | 71.43% |  |    |
| CPEB3_GLA         | 90.24% | 71.43% |  |    |
| CPEB3_LLGL1       | 90.24% | 71.43% |  |    |
| CPEB3_MNDA        | 90.24% | 71.43% |  |    |
| CYP4B1_LLGL1      | 90.24% | 71.43% |  |    |
| CYP4B1_STMN1      | 90.24% | 71.43% |  |    |
| DDAH1_HEXB        | 90.24% | 71.43% |  |    |
| DEK_GLA           | 90.24% | 71.43% |  |    |
| DHX15_HSPE1       | 90.24% | 71.43% |  |    |
| EIF4ENIF1_LLGL1   | 90.24% | 71.43% |  |    |
| ESRRA_LLGL1       | 90.24% | 71.43% |  |    |
| ETF1_PLAC8        | 90.24% | 71.43% |  |    |
| FURIN_SALL2       | 90.24% | 71.43% |  |    |
| GATM_KCNAB3       | 90.24% | 71.43% |  |    |
| GHITM_GLA         | 90.24% | 71.43% |  |    |
| GLA_HLA-DPB1      | 90.24% | 71.43% |  |    |
| GLA_KHDRBS3       | 90.24% | 71.43% |  |    |
| GLA_KRT10         | 90.24% | 71.43% |  |    |
| GLA_LIN7A         | 90.24% | 71.43% |  |    |
| GLA_NUP155        | 90.24% | 71.43% |  |    |
| GLA_PEPD          | 90.24% | 71.43% |  |    |
| GLA_PKIA          | 90.24% | 71.43% |  |    |
| GLA_SCO2          | 90.24% | 71.43% |  |    |

|                |        |        |  |  |
|----------------|--------|--------|--|--|
| GLA_SILV       | 90.24% | 71.43% |  |  |
| GLA_SLC1A3     | 90.24% | 71.43% |  |  |
| GLA_SPAG5      | 90.24% | 71.43% |  |  |
| GLA_SPRR1B     | 90.24% | 71.43% |  |  |
| GLA_STAR       | 90.24% | 71.43% |  |  |
| GLA_STMN2      | 90.24% | 71.43% |  |  |
| GLA_TNP1       | 90.24% | 71.43% |  |  |
| HLA-DMA_LLGL1  | 90.24% | 71.43% |  |  |
| HLA-DPB1_HSPE1 | 90.24% | 71.43% |  |  |
| HRASLS_IFITM2  | 90.24% | 71.43% |  |  |
| HSPE1_PSME1    | 90.24% | 71.43% |  |  |
| HSPE1_TRPV2    | 90.24% | 71.43% |  |  |
| IFI30_KBTBD2   | 90.24% | 71.43% |  |  |
| IFITM2_ITGB3BP | 90.24% | 71.43% |  |  |
| IFITM2_MAGEC2  | 90.24% | 71.43% |  |  |
| IFITM2_ZNF26   | 90.24% | 71.43% |  |  |
| IL22RA1_PIGR   | 90.24% | 71.43% |  |  |
| IL6R_KBTBD2    | 90.24% | 71.43% |  |  |
| INSL5_RUNX3    | 90.24% | 71.43% |  |  |
| IVL_SERPINA6   | 90.24% | 71.43% |  |  |
| KBTBD2_MRPS11  | 90.24% | 71.43% |  |  |
| KIF5C_SH3YL1   | 90.24% | 71.43% |  |  |
| LETMD1_RUNX3   | 90.24% | 71.43% |  |  |
| LLGL1_LMO3     | 90.24% | 71.43% |  |  |
| LLGL1_PEX11B   | 90.24% | 71.43% |  |  |
| LLGL1_PIM2     | 90.24% | 71.43% |  |  |
| LLGL1_PLAC8    | 90.24% | 71.43% |  |  |
| LLGL1_SLAMF7   | 90.24% | 71.43% |  |  |
| MAGEC2_PSME1   | 90.24% | 71.43% |  |  |
| MNDA_RUNX3     | 90.24% | 71.43% |  |  |
| MRPS28_RUNX3   | 90.24% | 71.43% |  |  |
| NIT1_RUNX3     | 90.24% | 71.43% |  |  |
| NOX4_SPINK2    | 90.24% | 71.43% |  |  |
| PIGR_ZFPL1     | 90.24% | 71.43% |  |  |
| RIMS3_RPL34    | 90.24% | 71.43% |  |  |
| RNASE6_ZNF24   | 90.24% | 71.43% |  |  |
| SCEL_SLIT1     | 90.24% | 71.43% |  |  |
| DSP_RALBP1     | 87.80% | 87.30% |  |  |
| TP53I3_UCN     | 87.80% | 77.78% |  |  |
| KLKB1_PLAC8    | 87.80% | 76.19% |  |  |
| LGALS1_MAGEC2  | 87.80% | 76.19% |  |  |

|                  |        |        |   |  |
|------------------|--------|--------|---|--|
| CSTB_PLAC8       | 87.80% | 74.60% |   |  |
| LLGL1_PKIA       | 87.80% | 74.60% |   |  |
| AKR1B1_RUNX3     | 87.80% | 73.02% |   |  |
| APCS_FAM32A      | 87.80% | 73.02% |   |  |
| APCS_PLAC8       | 87.80% | 73.02% |   |  |
| CHST2_TP53I3     | 87.80% | 73.02% |   |  |
| CSTB_SCEL        | 87.80% | 73.02% |   |  |
| CTSK_RNASE6      | 87.80% | 73.02% | * |  |
| FURIN_PLAC8      | 87.80% | 73.02% |   |  |
| ACVR1_APCS       | 87.80% | 71.43% |   |  |
| AGA_GLA          | 87.80% | 71.43% |   |  |
| AKAP10_APCS      | 87.80% | 71.43% |   |  |
| APCS_C3AR1       | 87.80% | 71.43% |   |  |
| APCS_CYP4B1      | 87.80% | 71.43% |   |  |
| APCS_HPRT1       | 87.80% | 71.43% |   |  |
| APCS_NES         | 87.80% | 71.43% |   |  |
| APCS_RPE         | 87.80% | 71.43% |   |  |
| B3GNT3_SALL2     | 87.80% | 71.43% |   |  |
| BCL6_MRPS7       | 87.80% | 71.43% |   |  |
| C20orf117_IVL    | 87.80% | 71.43% |   |  |
| C9orf125_HSPE1   | 87.80% | 71.43% |   |  |
| C9orf125_LLGL1   | 87.80% | 71.43% |   |  |
| CCL13_IFITM2     | 87.80% | 71.43% |   |  |
| CCL27_IFITM2     | 87.80% | 71.43% |   |  |
| CCRL1_IFITM2     | 87.80% | 71.43% |   |  |
| CCRL1_LLGL1      | 87.80% | 71.43% |   |  |
| CD83_PIGR        | 87.80% | 71.43% |   |  |
| CHST11_RALBP1    | 87.80% | 71.43% |   |  |
| CKM_IFITM2       | 87.80% | 71.43% |   |  |
| COL21A1_KBTBD2   | 87.80% | 71.43% |   |  |
| CORT_GLA         | 87.80% | 71.43% |   |  |
| CYB561_TP53I3    | 87.80% | 71.43% |   |  |
| DDB2_GLA         | 87.80% | 71.43% |   |  |
| DIAPH3_IFITM2    | 87.80% | 71.43% |   |  |
| DUSP9_GATM       | 87.80% | 71.43% |   |  |
| DYRK3_IFITM2     | 87.80% | 71.43% |   |  |
| EIF4ENIF1_KBTBD2 | 87.80% | 71.43% |   |  |
| EIF4ENIF1_MNDA   | 87.80% | 71.43% |   |  |
| FABP4_KBTBD2     | 87.80% | 71.43% |   |  |
| FCGR2A_KIF5C     | 87.80% | 71.43% |   |  |
| FCGR2A_TNP1      | 87.80% | 71.43% |   |  |

|                |        |        |  |  |
|----------------|--------|--------|--|--|
| GATM_GFI1B     | 87.80% | 71.43% |  |  |
| GATM_MUC13     | 87.80% | 71.43% |  |  |
| GATM_TEX13B    | 87.80% | 71.43% |  |  |
| GATM_TNC       | 87.80% | 71.43% |  |  |
| GATM_TRPV6     | 87.80% | 71.43% |  |  |
| GLA_PRM1       | 87.80% | 71.43% |  |  |
| GLA_SSB        | 87.80% | 71.43% |  |  |
| GLA_TYRP1      | 87.80% | 71.43% |  |  |
| HERC5_RAMP1    | 87.80% | 71.43% |  |  |
| HERC5_RPL34    | 87.80% | 71.43% |  |  |
| HIST1H1C_RPL34 | 87.80% | 71.43% |  |  |
| HOXD9_SALL2    | 87.80% | 71.43% |  |  |
| HSD17B3_PIGR   | 87.80% | 71.43% |  |  |
| HSPA6_HSPE1    | 87.80% | 71.43% |  |  |
| HSPE1_IFI30    | 87.80% | 71.43% |  |  |
| HSPE1_LIPA     | 87.80% | 71.43% |  |  |
| HSPE1_MX2      | 87.80% | 71.43% |  |  |
| HSPE1_NES      | 87.80% | 71.43% |  |  |
| HSPE1_NKG7     | 87.80% | 71.43% |  |  |
| HSPE1_OAS3     | 87.80% | 71.43% |  |  |
| HSPE1_PAK6     | 87.80% | 71.43% |  |  |
| ID4_IVL        | 87.80% | 71.43% |  |  |
| IFITM2_IVL     | 87.80% | 71.43% |  |  |
| IFITM2_PKIA    | 87.80% | 71.43% |  |  |
| IFITM2_PLUNC   | 87.80% | 71.43% |  |  |
| IFITM2_SLC1A2  | 87.80% | 71.43% |  |  |
| IFITM2_SNX5    | 87.80% | 71.43% |  |  |
| KBTBD2_OAS3    | 87.80% | 71.43% |  |  |
| KBTBD2_ODF2    | 87.80% | 71.43% |  |  |
| KBTBD2_PIM2    | 87.80% | 71.43% |  |  |
| KBTBD2_UBASH3A | 87.80% | 71.43% |  |  |
| LCP2_LLGL1     | 87.80% | 71.43% |  |  |
| LLGL1_OSTF1    | 87.80% | 71.43% |  |  |
| LRCH1_PIGR     | 87.80% | 71.43% |  |  |
| MNDA_MPV17     | 87.80% | 71.43% |  |  |
| MNDA_MXD3      | 87.80% | 71.43% |  |  |
| MNDA_PIGR      | 87.80% | 71.43% |  |  |
| OAS3_TBL2      | 87.80% | 71.43% |  |  |
| P2RY2_TNP1     | 87.80% | 71.43% |  |  |
| PPRC1_SCEL     | 87.80% | 71.43% |  |  |
| RAI2_TNP1      | 87.80% | 71.43% |  |  |

|                 |        |        |  |  |
|-----------------|--------|--------|--|--|
| RUNX3_SAMHD1    | 87.80% | 71.43% |  |  |
| RUNX3_SCYE1     | 87.80% | 71.43% |  |  |
| RUNX3_ZNF330    | 87.80% | 71.43% |  |  |
| SDC2_TP53I3     | 87.80% | 71.43% |  |  |
| SERPINA6_TP53I3 | 87.80% | 71.43% |  |  |
| TCP11_YWHAB     | 87.80% | 71.43% |  |  |
| TNP1_WNT4       | 87.80% | 71.43% |  |  |

Table S3 (c). The top 1-gene signature for the BCC. (The 2<sup>nd</sup> and 3<sup>rd</sup> column represent the classification accuracy of the gene signature in the training set and independent testing set. The 4<sup>th</sup> and 5<sup>th</sup> column represent the prediction result of the urine-secretory [marked by \*] and blood-secretory [marked by \*\*] )

| BCC 1-gene signatures |                   |                  |       |       |
|-----------------------|-------------------|------------------|-------|-------|
| genes                 | Training accuracy | Testing accuracy | urine | blood |
| CS                    | 0.903226          | 0.87             |       |       |
| TACSTD1               | 0.870968          | 0.87             |       |       |
| EGR1                  | 0.870968          | 0.8125           |       | **    |
| MAGEA9                | 0.870968          | 0.8125           |       |       |
| CPOX                  | 0.870968          | 0.75             |       |       |
| KEAP1                 | 0.83871           | 0.8125           |       |       |
| MLF1                  | 0.83871           | 0.8125           |       | **    |
| PCSK6                 | 0.83871           | 0.8125           |       | **    |
| PINK1                 | 0.83871           | 0.8125           |       |       |
| RNASEH1               | 0.83871           | 0.8125           |       |       |
| SLC39A2               | 0.83871           | 0.8125           |       | **    |
| TTC1                  | 0.83871           | 0.8125           |       |       |
| CLPTM1                | 0.83871           | 0.8125           |       |       |
| ANXA7                 | 0.83871           | 0.75             |       |       |
| CLIC4                 | 0.83871           | 0.75             |       |       |
| SNAPC2                | 0.83871           | 0.75             |       | **    |
| TNNI2                 | 0.83871           | 0.75             |       | **    |
| AMOTL2                | 0.83871           | 0.6875           |       |       |
| GNAI2                 | 0.83871           | 0.625            |       |       |
| APOD                  | 0.806452          | 0.8              |       | **    |
| LMNA                  | 0.806452          | 0.8              |       |       |
| AKR1C1                | 0.806452          | 0.8              |       |       |
| DUSP2                 | 0.806452          | 0.8              |       |       |
| MYH2                  | 0.806452          | 0.8              |       |       |
| RBBP4                 | 0.806452          | 0.8              |       |       |



|          |          |      |   |    |
|----------|----------|------|---|----|
| BASP1    | 0.806452 | 0.8  |   | ** |
| PPM1A    | 0.806452 | 0.8  |   |    |
| RAB3D    | 0.806452 | 0.8  | * |    |
| ATP1A2   | 0.806452 | 0.75 |   |    |
| DTX2     | 0.806452 | 0.75 |   |    |
| FVT1     | 0.806452 | 0.75 |   |    |
| MGST2    | 0.806452 | 0.75 |   |    |
| NDUFA6   | 0.806452 | 0.75 |   |    |
| NDUFB2   | 0.806452 | 0.75 |   |    |
| PRNP     | 0.806452 | 0.75 |   |    |
| C21orf25 | 0.774194 | 0.75 |   |    |
| FADS2    | 0.774194 | 0.75 |   |    |
| B4GALT3  | 0.774194 | 0.75 |   |    |
| IMPDH2   | 0.774194 | 0.75 |   |    |
| MIF      | 0.774194 | 0.75 |   | ** |
| RRAGA    | 0.774194 | 0.75 |   |    |
| C9orf58  | 0.774194 | 0.75 |   |    |
| CRYAA    | 0.774194 | 0.75 |   |    |
| DLGAP4   | 0.774194 | 0.75 |   |    |
| ERF      | 0.774194 | 0.75 |   |    |
| GNAI3    | 0.774194 | 0.75 |   |    |
| GRB7     | 0.774194 | 0.75 |   |    |
| LGALS12  | 0.774194 | 0.75 |   | ** |
| NBL1     | 0.774194 | 0.75 |   |    |
| PPP1R13B | 0.774194 | 0.75 |   |    |
| RAB1B    | 0.774194 | 0.75 |   |    |
| RARRES2  | 0.774194 | 0.75 |   | ** |
| RPS19    | 0.774194 | 0.75 |   |    |
| SMS      | 0.774194 | 0.75 |   |    |
| VCY      | 0.774194 | 0.75 |   |    |

Table S3 (d). The top 2-gene signature for the BCC. (The 2<sup>nd</sup> and 3<sup>rd</sup> column represent the classification accuracy of the gene signature in the training set and independent testing set. The 4<sup>th</sup> and 5<sup>th</sup> column represent the prediction result of the urine-secretory [marked by \*] and blood-secretory [marked by \*\*] )

| BCC 2-gene signatures |                   |                  |       |       |
|-----------------------|-------------------|------------------|-------|-------|
| genes                 | Training accuracy | Testing accuracy | urine | blood |
| ANXA7_NAP1L4          | 96.77%            | 93.75%           |       |       |
| HMGCR_MAGEA9          | 96.77%            | 93.75%           |       |       |

|                  |        |        |  |    |
|------------------|--------|--------|--|----|
| MAGEA9_SOX4      | 96.77% | 81.25% |  |    |
| COBL_TLR3        | 93.55% | 87.50% |  |    |
| EGR1_TNNI2       | 93.55% | 87.50% |  |    |
| FGF20_TLR3       | 93.55% | 87.50% |  |    |
| ING4_TACSTD1     | 93.55% | 87.50% |  |    |
| MRPS24_TLR3      | 93.55% | 87.50% |  |    |
| SFRS16_TACSTD1   | 93.55% | 87.50% |  |    |
| SLC25A28_TACSTD1 | 93.55% | 87.50% |  |    |
| ACBD6_CS         | 93.55% | 81.25% |  |    |
| ANXA7_EGR1       | 93.55% | 81.25% |  |    |
| TACSTD1_TLR8     | 93.55% | 81.25% |  |    |
| AMOTL2_MRPS24    | 93.55% | 75.00% |  |    |
| HMGCR_TLR3       | 90.32% | 87.50% |  |    |
| BRD4_TACSTD1     | 90.32% | 87.50% |  |    |
| COL6A2_TACSTD1   | 90.32% | 87.50% |  |    |
| CS_FRG1          | 90.32% | 87.50% |  |    |
| SOX4_TACSTD1     | 90.32% | 87.50% |  |    |
| ANXA7_ARHGAP26   | 90.32% | 87.50% |  |    |
| ANXA7_ERF        | 90.32% | 87.50% |  |    |
| ANXA7_MYH2       | 90.32% | 87.50% |  |    |
| ANXA7_TACSTD1    | 90.32% | 87.50% |  |    |
| CS_MYH2          | 90.32% | 87.50% |  |    |
| EGR1_SLC7A11     | 90.32% | 87.50% |  |    |
| SPARCL1_TACSTD1  | 90.32% | 87.50% |  |    |
| ANXA7_PCSK6      | 90.32% | 81.25% |  |    |
| ANXA7_TLR3       | 90.32% | 81.25% |  |    |
| CAPZA2_TLR3      | 90.32% | 81.25% |  |    |
| CD3D_TACSTD1     | 90.32% | 81.25% |  |    |
| HRASLS_TLR3      | 90.32% | 81.25% |  |    |
| NEU4_TACSTD1     | 90.32% | 81.25% |  |    |
| AMOTL2_C20orf103 | 90.32% | 75.00% |  |    |
| ANXA7_CLIC4      | 90.32% | 75.00% |  |    |
| EGR1_RARRES2     | 90.32% | 75.00% |  | ** |
| MPHOSPH10_TLR3   | 90.32% | 75.00% |  |    |
| TACSTD1_TRPC4    | 90.32% | 75.00% |  |    |
| AMOTL2_POP4      | 87.10% | 81.25% |  |    |
| ANXA7_CNP        | 87.10% | 81.25% |  |    |
| CS_RPL36AL       | 87.10% | 81.25% |  |    |
| ACSL4_EGR1       | 87.10% | 81.25% |  |    |
| ANXA7_PPP1R13B   | 87.10% | 81.25% |  |    |
| ELAC2_MAGEA9     | 87.10% | 81.25% |  |    |

|                 |        |        |  |    |
|-----------------|--------|--------|--|----|
| LDHA_TACSTD1    | 87.10% | 81.25% |  |    |
| MRP63_TACSTD1   | 87.10% | 81.25% |  |    |
| OSTF1_TACSTD1   | 87.10% | 81.25% |  |    |
| RFX2_TACSTD1    | 87.10% | 81.25% |  |    |
| RPS9_TACSTD1    | 87.10% | 81.25% |  |    |
| TACSTD1_TNNI2   | 87.10% | 81.25% |  | ** |
| ABCD3_ANXA7     | 87.10% | 81.25% |  |    |
| ANXA7_PSMC4     | 87.10% | 81.25% |  |    |
| COL18A1_EGR1    | 87.10% | 81.25% |  | ** |
| CS_ELK1         | 87.10% | 81.25% |  |    |
| EGR1_GNAI3      | 87.10% | 81.25% |  |    |
| EGR1_MRPS24     | 87.10% | 81.25% |  |    |
| GALT_TACSTD1    | 87.10% | 81.25% |  |    |
| MSH2_TLR3       | 87.10% | 81.25% |  | ** |
| PSMB5_TACSTD1   | 87.10% | 81.25% |  |    |
| SUPT5H_TACSTD1  | 87.10% | 81.25% |  |    |
| C20orf103_TLR3  | 87.10% | 81.25% |  |    |
| COL18A1_CS      | 87.10% | 81.25% |  |    |
| COL18A1_TACSTD1 | 87.10% | 81.25% |  |    |
| CSTB_MAGEA9     | 87.10% | 81.25% |  |    |
| CS_DGCR2        | 87.10% | 81.25% |  |    |
| CS_MRPS24       | 87.10% | 81.25% |  |    |
| EGR1_METAP1     | 87.10% | 81.25% |  |    |
| FABP5_TACSTD1   | 87.10% | 81.25% |  |    |
| NRN1_TACSTD1    | 87.10% | 81.25% |  |    |
| ANXA7_MRPS24    | 87.10% | 75.00% |  |    |
| BTN3A3_EGR1     | 87.10% | 75.00% |  |    |
| CAPZA2_EGR1     | 87.10% | 75.00% |  |    |
| COL11A2_EGR1    | 87.10% | 75.00% |  | ** |
| CSF1R_EGR1      | 87.10% | 75.00% |  |    |
| EGR1_MYBBP1A    | 87.10% | 75.00% |  |    |
| EGR1_RFX2       | 87.10% | 75.00% |  |    |
| EGR1_SFRS11     | 87.10% | 75.00% |  |    |
| MAGEA9_SPARCL1  | 87.10% | 75.00% |  |    |
