# Supplementary material for: A Comparative Study of Gene-Expression Data of Basal Cell Carcinoma and Melanoma Reveals New Insights about the Two Cancers
Source: PubMed Central journal article supplement (PMC3266277; doi:10.1371/journal.pone.0030750), 2012-01-25
Supplement: pone.0030750.s010.pdf [file pone.0030750.s010.pdf]

Table S5. The common gene shared by the datasets used in this study.

| Gene ID | Gene Name                                                                                                    | Gene Symbol | Species      |
|---------|--------------------------------------------------------------------------------------------------------------|-------------|--------------|
| 65985   | acetoacetyl-CoA synthetase                                                                                   | AACS        | Homo sapiens |
| 13      | arylacetamide deacetylase (esterase)                                                                         | AADAC       | Homo sapiens |
| 22848   | AP2 associated kinase 1                                                                                      | AAK1        | Homo sapiens |
| 14      | angio-associated, migratory cell protein                                                                     | AAMP        | Homo sapiens |
| 16      | alanyl-tRNA synthetase                                                                                       | AARS        | Homo sapiens |
| 10157   | aminoadipate-semialdehyde synthase                                                                           | AASS        | Homo sapiens |
| 26574   | apoptosis antagonizing transcription factor                                                                  | AATF        | Homo sapiens |
| 18      | 4-aminobutyrate aminotransferase                                                                             | ABAT        | Homo sapiens |
| 19      | ATP-binding cassette, sub-family A (ABC1), member 1                                                          | ABCA1       | Homo sapiens |
| 21      | ATP-binding cassette, sub-family A (ABC1), member 3                                                          | ABCA3       | Homo sapiens |
| 24      | ATP-binding cassette, sub-family A (ABC1), member 4                                                          | ABCA4       | Homo sapiens |
| 23461   | ATP-binding cassette, sub-family A (ABC1), member 5                                                          | ABCA5       | Homo sapiens |
| 10351   | ATP-binding cassette, sub-family A (ABC1), member 8                                                          | ABCA8       | Homo sapiens |
| 5243    | ATP-binding cassette, sub-family B (MDR/TAP), member 1                                                       | ABCB1       | Homo sapiens |
| 5244    | ATP-binding cassette, sub-family B (MDR/TAP), member 4                                                       | ABCB4       | Homo sapiens |
| 10058   | ATP-binding cassette, sub-family B (MDR/TAP), member 6                                                       | ABCB6       | Homo sapiens |
| 22      | ATP-binding cassette, sub-family B (MDR/TAP), member 7                                                       | ABCB7       | Homo sapiens |
| 11194   | ATP-binding cassette, sub-family B (MDR/TAP), member 8                                                       | ABCB8       | Homo sapiens |
| 23457   | ATP-binding cassette, sub-family B (MDR/TAP), member 9                                                       | ABCB9       | Homo sapiens |
| 4363    | ATP-binding cassette, sub-family C (CFTR/MRP), member 1                                                      | ABCC1       | Homo sapiens |
| 89845   | ATP-binding cassette, sub-family C (CFTR/MRP), member 10                                                     | ABCC10      | Homo sapiens |
| 1244    | ATP-binding cassette, sub-family C (CFTR/MRP), member 2                                                      | ABCC2       | Homo sapiens |
| 10057   | ATP-binding cassette, sub-family C (CFTR/MRP), member 5                                                      | ABCC5       | Homo sapiens |
| 6833    | ATP-binding cassette, sub-family C (CFTR/MRP), member 8                                                      | ABCC8       | Homo sapiens |
| 215     | ATP-binding cassette, sub-family D (ALD), member 1                                                           | ABCD1       | Homo sapiens |
| 5826    | ATP-binding cassette, sub-family D (ALD), member 4                                                           | ABCD4       | Homo sapiens |
| 6059    | similar to ATP-binding cassette, sub-family E, member 1; ATP-binding cassette, sub-family E (OABP), member 1 | ABCE1       | Homo sapiens |
| 647150  | similar to ATP-binding cassette, sub-family E, member 1; ATP-binding cassette, sub-family E (OABP), member 1 | ABCE1       | Homo sapiens |
| 55324   | ATP-binding cassette, sub-family F (GCN20), member 3                                                         | ABCF3       | Homo sapiens |
| 9619    | ATP-binding cassette, sub-family G (WHITE), member 1                                                         | ABCG1       | Homo sapiens |
| 9429    | ATP-binding cassette, sub-family G (WHITE), member 2                                                         | ABCG2       | Homo sapiens |
| 64240   | ATP-binding cassette, sub-family G (WHITE), member 5                                                         | ABCG5       | Homo sapiens |
| 171586  | abhydrolase domain containing 3                                                                              | ABHD3       | Homo sapiens |
| 63874   | abhydrolase domain containing 4                                                                              | ABHD4       | Homo sapiens |
| 51099   | abhydrolase domain containing 5                                                                              | ABHD5       | Homo sapiens |
| 10152   | abl interactor 2                                                                                             | ABI2        | Homo sapiens |
| 3983    | actin binding LIM protein 1                                                                                  | ABLIM1      | Homo sapiens |
| 22885   | actin binding LIM protein family, member 3                                                                   | ABLIM3      | Homo sapiens |
| 25841   | ankyrin repeat and BTB (POZ) domain containing 2                                                             | ABTB2       | Homo sapiens |
| 30      | acetyl-Coenzyme A acyltransferase 1                                                                          | ACAA1       | Homo sapiens |
| 10449   | hypothetical LOC648603; acetyl-Coenzyme A acyltransferase 2                                                  | ACAA2       | Homo sapiens |
| 648603  | hypothetical LOC648603; acetyl-Coenzyme A acyltransferase 2                                                  | ACAA2       | Homo sapiens |

|       |                                                                  |        |              |
|-------|------------------------------------------------------------------|--------|--------------|
| 32    | acetyl-Coenzyme A carboxylase beta                               | ACACB  | Homo sapiens |
| 27034 | acyl-Coenzyme A dehydrogenase family, member 8                   | ACAD8  | Homo sapiens |
| 33    | acyl-Coenzyme A dehydrogenase, long chain                        | ACADL  | Homo sapiens |
| 34    | acyl-Coenzyme A dehydrogenase, C-4 to C-12 straight chain        | ACADM  | Homo sapiens |
| 35    | acyl-Coenzyme A dehydrogenase, C-2 to C-3 short chain            | ACADS  | Homo sapiens |
| 36    | acyl-Coenzyme A dehydrogenase, short/branched chain              | ACADSB | Homo sapiens |
| 37    | acyl-Coenzyme A dehydrogenase, very long chain                   | ACADVL | Homo sapiens |
| 38    | acetyl-Coenzyme A acetyltransferase 1                            | ACAT1  | Homo sapiens |
| 39    | acetyl-Coenzyme A acetyltransferase 2                            | ACAT2  | Homo sapiens |
| 41    | amiloride-sensitive cation channel 2, neuronal                   | ACCN2  | Homo sapiens |
| 1636  | angiotensin I converting enzyme (peptidyl-dipeptidase A) 1       | ACE    | Homo sapiens |
| 43    | acetylcholinesterase (Yt blood group)                            | ACHE   | Homo sapiens |
| 47    | ATP citrate lyase                                                | ACLY   | Homo sapiens |
| 48    | aconitase 1, soluble                                             | ACO1   | Homo sapiens |
| 51    | acyl-Coenzyme A oxidase 1, palmitoyl                             | ACOX1  | Homo sapiens |
| 8309  | acyl-Coenzyme A oxidase 2, branched chain                        | ACOX2  | Homo sapiens |
| 53    | acid phosphatase 2, lysosomal                                    | ACP2   | Homo sapiens |
| 54    | acid phosphatase 5, tartrate resistant                           | ACP5   | Homo sapiens |
| 51205 | acid phosphatase 6, lysophosphatidic                             | ACP6   | Homo sapiens |
| 55    | acid phosphatase, prostate                                       | ACPP   | Homo sapiens |
| 49    | acrosin                                                          | ACR    | Homo sapiens |
| 56    | acrosomal vesicle protein 1                                      | ACRV1  | Homo sapiens |
| 2181  | acyl-CoA synthetase long-chain family member 3                   | ACSL3  | Homo sapiens |
| 2182  | acyl-CoA synthetase long-chain family member 4                   | ACSL4  | Homo sapiens |
| 51703 | acyl-CoA synthetase long-chain family member 5                   | ACSL5  | Homo sapiens |
| 23305 | acyl-CoA synthetase long-chain family member 6                   | ACSL6  | Homo sapiens |
| 59    | actin, alpha 2, smooth muscle, aorta                             | ACTA2  | Homo sapiens |
| 72    | actin, gamma 2, smooth muscle, enteric                           | ACTG2  | Homo sapiens |
| 86    | actin-like 6A                                                    | ACTL6A | Homo sapiens |
| 89    | actinin, alpha 3                                                 | ACTN3  | Homo sapiens |
| 10121 | ARP1 actin-related protein 1 homolog A, contractin alpha (yeast) | ACTR1A | Homo sapiens |
| 90    | activin A receptor, type I                                       | ACVR1  | Homo sapiens |
| 91    | activin A receptor, type IB                                      | ACVR1B | Homo sapiens |
| 93    | activin A receptor, type IIB                                     | ACVR2B | Homo sapiens |
| 94    | activin A receptor type II-like 1                                | ACVRL1 | Homo sapiens |
| 97    | acylphosphatase 1, erythrocyte (common) type                     | ACYP1  | Homo sapiens |
| 100   | adenosine deaminase                                              | ADA    | Homo sapiens |
| 102   | ADAM metallopeptidase domain 10                                  | ADAM10 | Homo sapiens |
| 4185  | ADAM metallopeptidase domain 11                                  | ADAM11 | Homo sapiens |
| 8038  | ADAM metallopeptidase domain 12                                  | ADAM12 | Homo sapiens |
| 8751  | ADAM metallopeptidase domain 15                                  | ADAM15 | Homo sapiens |
| 6868  | ADAM metallopeptidase domain 17                                  | ADAM17 | Homo sapiens |
| 8749  | ADAM metallopeptidase domain 18                                  | ADAM18 | Homo sapiens |
| 53616 | ADAM metallopeptidase domain 22                                  | ADAM22 | Homo sapiens |
| 8745  | ADAM metallopeptidase domain 23                                  | ADAM23 | Homo sapiens |
| 10863 | ADAM metallopeptidase domain 28                                  | ADAM28 | Homo sapiens |

|           |                                                                                              |          |              |
|-----------|----------------------------------------------------------------------------------------------|----------|--------------|
| 11085     | ADAM metallopeptidase domain 30                                                              | ADAM30   | Homo sapiens |
| 80332     | ADAM metallopeptidase domain 33                                                              | ADAM33   | Homo sapiens |
| 8754      | ADAM metallopeptidase domain 9 (meltrin gamma)                                               | ADAM9    | Homo sapiens |
| 27299     | ADAM-like, decysin 1                                                                         | ADAMDEC1 | Homo sapiens |
| 9510      | ADAM metallopeptidase with thrombospondin type 1 motif, 1                                    | ADAMTS1  | Homo sapiens |
| 81792     | ADAM metallopeptidase with thrombospondin type 1 motif, 12                                   | ADAMTS12 | Homo sapiens |
| 9508      | ADAM metallopeptidase with thrombospondin type 1 motif, 3                                    | ADAMTS3  | Homo sapiens |
| 11096     | ADAM metallopeptidase with thrombospondin type 1 motif, 5                                    | ADAMTS5  | Homo sapiens |
| 11174     | ADAM metallopeptidase with thrombospondin type 1 motif, 6                                    | ADAMTS6  | Homo sapiens |
| 103       | adenosine deaminase, RNA-specific                                                            | ADAR     | Homo sapiens |
| 104       | adenosine deaminase, RNA-specific, B1 (RED1 homolog rat)                                     | ADARB1   | Homo sapiens |
| 107       | adenylate cyclase 1 (brain)                                                                  | ADCY1    | Homo sapiens |
| 108       | adenylate cyclase 2 (brain)                                                                  | ADCY2    | Homo sapiens |
| 196883    | adenylate cyclase 4                                                                          | ADCY4    | Homo sapiens |
| 113       | adenylate cyclase 7                                                                          | ADCY7    | Homo sapiens |
| 115       | adenylate cyclase 9                                                                          | ADCY9    | Homo sapiens |
| 118       | adducin 1 (alpha)                                                                            | ADD1     | Homo sapiens |
| 119       | adducin 2 (beta)                                                                             | ADD2     | Homo sapiens |
| 120       | adducin 3 (gamma)                                                                            | ADD3     | Homo sapiens |
| 130       | alcohol dehydrogenase 6 (class V)                                                            | ADH6     | Homo sapiens |
| 51094     | adiponectin receptor 1                                                                       | ADIPOR1  | Homo sapiens |
| 132       | adenosine kinase                                                                             | ADK      | Homo sapiens |
| 133       | adrenomedullin                                                                               | ADM      | Homo sapiens |
| 23394     | activity-dependent neuroprotector homeobox                                                   | ADNP     | Homo sapiens |
| 135       | adenosine A2a receptor                                                                       | ADORA2A  | Homo sapiens |
| 136       | hypothetical LOC100131909; adenosine A2b receptor                                            | ADORA2B  | Homo sapiens |
| 100131909 | hypothetical LOC100131909; adenosine A2b receptor                                            | ADORA2B  | Homo sapiens |
| 140       | adenosine A3 receptor                                                                        | ADORA3   | Homo sapiens |
| 147       | adrenergic, alpha-1B-, receptor                                                              | ADRA1B   | Homo sapiens |
| 146       | adrenergic, alpha-1D-, receptor                                                              | ADRA1D   | Homo sapiens |
| 154       | adrenergic, beta-2-, receptor, surface                                                       | ADRB2    | Homo sapiens |
| 155       | adrenergic, beta-3-, receptor                                                                | ADRB3    | Homo sapiens |
| 156       | adrenergic, beta, receptor kinase 1                                                          | ADRBK1   | Homo sapiens |
| 157       | adrenergic, beta, receptor kinase 2                                                          | ADRBK2   | Homo sapiens |
| 11047     | adhesion regulating molecule 1                                                               | ADRM1    | Homo sapiens |
| 158       | adenylosuccinate lyase                                                                       | ADSL     | Homo sapiens |
| 159       | adenylosuccinate synthase                                                                    | ADSS     | Homo sapiens |
| 165       | AE binding protein 1                                                                         | AEBP1    | Homo sapiens |
| 174       | alpha-fetoprotein                                                                            | AFP      | Homo sapiens |
| 175       | aspartylglucosaminidase                                                                      | AGA      | Homo sapiens |
| 177       | advanced glycosylation end product-specific receptor                                         | AGER     | Homo sapiens |
| 178       | amylo-1, 6-glucosidase, 4-alpha-glucanotransferase                                           | AGL      | Homo sapiens |
| 10555     | 1-acylglycerol-3-phosphate O-acyltransferase 2 (lysophosphatidic acid acyltransferase, beta) | AGPAT2   | Homo sapiens |
| 8540      | alkylglycerone phosphate synthase                                                            | AGPS     | Homo sapiens |
| 10551     | anterior gradient homolog 2 (Xenopus laevis)                                                 | AGR2     | Homo sapiens |

|           |                                                                                                                                            |         |              |
|-----------|--------------------------------------------------------------------------------------------------------------------------------------------|---------|--------------|
| 183       | angiotensinogen (serpin peptidase inhibitor, clade A, member 8)                                                                            | AGT     | Homo sapiens |
| 185       | angiotensin II receptor, type 1                                                                                                            | AGTR1   | Homo sapiens |
| 10768     | adenosylhomocysteinase-like 1                                                                                                              | AHCYL1  | Homo sapiens |
| 196       | aryl hydrocarbon receptor                                                                                                                  | AHR     | Homo sapiens |
| 10598     | AHA1, activator of heat shock 90kDa protein ATPase homolog 1 (yeast)                                                                       | AHSA1   | Homo sapiens |
| 197       | alpha-2-HS-glycoprotein                                                                                                                    | AHSG    | Homo sapiens |
| 199       | allograft inflammatory factor 1                                                                                                            | AIF1    | Homo sapiens |
| 202       | absent in melanoma 1                                                                                                                       | AIM1    | Homo sapiens |
| 9447      | absent in melanoma 2                                                                                                                       | AIM2    | Homo sapiens |
| 9049      | aryl hydrocarbon receptor interacting protein                                                                                              | AIP     | Homo sapiens |
| 26289     | adenylate kinase 5                                                                                                                         | AK5     | Homo sapiens |
| 8165      | A kinase (PRKA) anchor protein 1                                                                                                           | AKAP1   | Homo sapiens |
| 11216     | A kinase (PRKA) anchor protein 10                                                                                                          | AKAP10  | Homo sapiens |
| 11215     | A kinase (PRKA) anchor protein 11                                                                                                          | AKAP11  | Homo sapiens |
| 9590      | A kinase (PRKA) anchor protein 12                                                                                                          | AKAP12  | Homo sapiens |
| 11214     | A kinase (PRKA) anchor protein 13                                                                                                          | AKAP13  | Homo sapiens |
| 10566     | A kinase (PRKA) anchor protein 3                                                                                                           | AKAP3   | Homo sapiens |
| 9472      | A kinase (PRKA) anchor protein 6                                                                                                           | AKAP6   | Homo sapiens |
| 26993     | A kinase (PRKA) anchor protein 8-like                                                                                                      | AKAP8L  | Homo sapiens |
| 10142     | A kinase (PRKA) anchor protein (yotiao) 9                                                                                                  | AKAP9   | Homo sapiens |
| 10327     | aldo-keto reductase family 1, member A1 (aldehyde reductase)                                                                               | AKR1A1  | Homo sapiens |
| 231       | aldo-keto reductase family 1, member B1 (aldose reductase)                                                                                 | AKR1B1  | Homo sapiens |
| 57016     | aldo-keto reductase family 1, member B10 (aldose reductase); aldo-keto reductase family 1, member B10-like                                 | AKR1B10 | Homo sapiens |
| 441282    | aldo-keto reductase family 1, member B10 (aldose reductase); aldo-keto reductase family 1, member B10-like                                 | AKR1B10 | Homo sapiens |
| 1645      | aldo-keto reductase family 1, member C1 (dihydrodiol dehydrogenase 1; 20-alpha (3-alpha)-hydroxysteroid dehydrogenase)                     | AKR1C1  | Homo sapiens |
| 1109      | aldo-keto reductase family 1, member C4 (chlordecone reductase; 3-alpha hydroxysteroid dehydrogenase, type I; dihydrodiol dehydrogenase 4) | AKR1C4  | Homo sapiens |
| 6718      | aldo-keto reductase family 1, member D1 (delta 4-3-ketosteroid-5-beta-reductase)                                                           | AKR1D1  | Homo sapiens |
| 8574      | aldo-keto reductase family 7, member A2 (aflatoxin aldehyde reductase)                                                                     | AKR7A2  | Homo sapiens |
| 10000     | v-akt murine thymoma viral oncogene homolog 3 (protein kinase B, gamma)                                                                    | AKT3    | Homo sapiens |
| 210       | aminolevulinate, delta-, dehydratase                                                                                                       | ALAD    | Homo sapiens |
| 211       | aminolevulinate, delta-, synthase 1                                                                                                        | ALAS1   | Homo sapiens |
| 212       | aminolevulinate, delta-, synthase 2                                                                                                        | ALAS2   | Homo sapiens |
| 213       | albumin                                                                                                                                    | ALB     | Homo sapiens |
| 214       | hypothetical protein LOC100133690; activated leukocyte cell adhesion molecule                                                              | ALCAM   | Homo sapiens |
| 100133690 | hypothetical protein LOC100133690; activated leukocyte cell adhesion molecule                                                              | ALCAM   | Homo sapiens |
| 216       | aldehyde dehydrogenase 1 family, member A1                                                                                                 | ALDH1A1 | Homo sapiens |
| 8854      | aldehyde dehydrogenase 1 family, member A2                                                                                                 | ALDH1A2 | Homo sapiens |

|        |                                                                                                    |         |              |
|--------|----------------------------------------------------------------------------------------------------|---------|--------------|
| 219    | aldehyde dehydrogenase 1 family, member B1                                                         | ALDH1B1 | Homo sapiens |
| 217    | aldehyde dehydrogenase 2 family (mitochondrial)                                                    | ALDH2   | Homo sapiens |
| 218    | aldehyde dehydrogenase 3 family, member A1                                                         | ALDH3A1 | Homo sapiens |
| 224    | aldehyde dehydrogenase 3 family, member A2                                                         | ALDH3A2 | Homo sapiens |
| 222    | aldehyde dehydrogenase 3 family, member B2                                                         | ALDH3B2 | Homo sapiens |
| 7915   | aldehyde dehydrogenase 5 family, member A1                                                         | ALDH5A1 | Homo sapiens |
| 4329   | aldehyde dehydrogenase 6 family, member A1                                                         | ALDH6A1 | Homo sapiens |
| 501    | aldehyde dehydrogenase 7 family, member A1                                                         | ALDH7A1 | Homo sapiens |
| 226    | aldolase A, fructose-bisphosphate                                                                  | ALDOA   | Homo sapiens |
| 229    | aldolase B, fructose-bisphosphate                                                                  | ALDOB   | Homo sapiens |
| 230    | aldolase C, fructose-bisphosphate                                                                  | ALDOC   | Homo sapiens |
| 56052  | asparagine-linked glycosylation 1, beta-1,4-mannosyltransferase homolog ( <i>S. cerevisiae</i> )   | ALG1    | Homo sapiens |
| 10195  | asparagine-linked glycosylation 3, alpha-1,3- mannosyltransferase homolog ( <i>S. cerevisiae</i> ) | ALG3    | Homo sapiens |
| 79053  | asparagine-linked glycosylation 8, alpha-1,3-glucosyltransferase homolog ( <i>S. cerevisiae</i> )  | ALG8    | Homo sapiens |
| 239    | arachidonate 12-lipoxygenase                                                                       | ALOX12  | Homo sapiens |
| 247    | arachidonate 15-lipoxygenase, type B                                                               | ALOX15B | Homo sapiens |
| 241    | arachidonate 5-lipoxygenase-activating protein                                                     | ALOX5AP | Homo sapiens |
| 23600  | C1q and tumor necrosis factor related protein 3; alpha-methylacyl-CoA racemase                     | AMACR   | Homo sapiens |
| 114899 | C1q and tumor necrosis factor related protein 3; alpha-methylacyl-CoA racemase                     | AMACR   | Homo sapiens |
| 262    | adenosylmethionine decarboxylase 1                                                                 | AMD1    | Homo sapiens |
| 267    | autocrine motility factor receptor                                                                 | AMFR    | Homo sapiens |
| 154796 | angiominin                                                                                         | AMOT    | Homo sapiens |
| 270    | adenosine monophosphate deaminase 1 (isoform M)                                                    | AMPD1   | Homo sapiens |
| 272    | adenosine monophosphate deaminase (isoform E)                                                      | AMPD3   | Homo sapiens |
| 273    | amphiphysin                                                                                        | AMPH    | Homo sapiens |
| 729198 | anaphase promoting complex subunit 10; anaphase promoting complex subunit 10 pseudogene            | ANAPC10 | Homo sapiens |
| 10393  | anaphase promoting complex subunit 10; anaphase promoting complex subunit 10 pseudogene            | ANAPC10 | Homo sapiens |
| 25847  | anaphase promoting complex subunit 13                                                              | ANAPC13 | Homo sapiens |
| 29882  | anaphase promoting complex subunit 2                                                               | ANAPC2  | Homo sapiens |
| 51433  | anaphase promoting complex subunit 5                                                               | ANAPC5  | Homo sapiens |
| 283    | angiogenin, ribonuclease, RNase A family, 5                                                        | ANG     | Homo sapiens |
| 284    | angiopoietin 1                                                                                     | ANGPT1  | Homo sapiens |
| 285    | angiopoietin 2                                                                                     | ANGPT2  | Homo sapiens |
| 27329  | angiopoietin-like 3                                                                                | ANGPTL3 | Homo sapiens |
| 51129  | angiopoietin-like 4                                                                                | ANGPTL4 | Homo sapiens |
| 287    | ankyrin 2, neuronal                                                                                | ANK2    | Homo sapiens |
| 288    | ankyrin 3, node of Ranvier (ankyrin G)                                                             | ANK3    | Homo sapiens |
| 27063  | ankyrin repeat domain 1 (cardiac muscle)                                                           | ANKRD1  | Homo sapiens |
| 23253  | ankyrin repeat domain 12                                                                           | ANKRD12 | Homo sapiens |
| 84168  | anthrax toxin receptor 1                                                                           | ANTXR1  | Homo sapiens |
| 301    | annexin A1                                                                                         | ANXA1   | Homo sapiens |

|           |                                                                     |         |              |
|-----------|---------------------------------------------------------------------|---------|--------------|
| 11199     | annexin A10                                                         | ANXA10  | Homo sapiens |
| 311       | annexin A11                                                         | ANXA11  | Homo sapiens |
| 306       | annexin A3                                                          | ANXA3   | Homo sapiens |
| 307       | annexin A4                                                          | ANXA4   | Homo sapiens |
| 308       | annexin A5                                                          | ANXA5   | Homo sapiens |
| 310       | annexin A7                                                          | ANXA7   | Homo sapiens |
| 8416      | annexin A9                                                          | ANXA9   | Homo sapiens |
| 314       | amine oxidase, copper containing 2 (retina-specific)                | AOC2    | Homo sapiens |
| 8639      | amine oxidase, copper containing 3 (vascular adhesion protein 1)    | AOC3    | Homo sapiens |
| 316       | aldehyde oxidase 1                                                  | AOX1    | Homo sapiens |
| 162       | adaptor-related protein complex 1, beta 1 subunit                   | AP1B1   | Homo sapiens |
| 164       | adaptor-related protein complex 1, gamma 1 subunit                  | AP1G1   | Homo sapiens |
| 1174      | adaptor-related protein complex 1, sigma 1 subunit                  | AP1S1   | Homo sapiens |
| 161       | adaptor-related protein complex 2, alpha 2 subunit                  | AP2A2   | Homo sapiens |
| 1175      | adaptor-related protein complex 2, sigma 1 subunit                  | AP2S1   | Homo sapiens |
| 8546      | adaptor-related protein complex 3, beta 1 subunit                   | AP3B1   | Homo sapiens |
| 8120      | adaptor-related protein complex 3, beta 2 subunit                   | AP3B2   | Homo sapiens |
| 8943      | adaptor-related protein complex 3, delta 1 subunit                  | AP3D1   | Homo sapiens |
| 10239     | adaptor-related protein complex 3, sigma 2 subunit                  | AP3S2   | Homo sapiens |
| 23431     | adaptor-related protein complex 4, epsilon 1 subunit                | AP4E1   | Homo sapiens |
| 9179      | adaptor-related protein complex 4, mu 1 subunit                     | AP4M1   | Homo sapiens |
| 321       | amyloid beta (A4) precursor protein-binding, family A, member 2     | APBA2   | Homo sapiens |
| 9546      | amyloid beta (A4) precursor protein-binding, family A, member 3     | APBA3   | Homo sapiens |
| 324       | adenomatous polyposis coli                                          | APC     | Homo sapiens |
| 10297     | adenomatosis polyposis coli 2                                       | APC2    | Homo sapiens |
| 325       | amyloid P component, serum                                          | APCS    | Homo sapiens |
| 328       | APEX nuclease (multifunctional DNA repair enzyme) 1                 | APEX1   | Homo sapiens |
| 27301     | APEX nuclease (apurinic/aprimidinic endonuclease) 2                 | APEX2   | Homo sapiens |
| 642812    | API5-like 1; apoptosis inhibitor 5                                  | API5    | Homo sapiens |
| 8539      | API5-like 1; apoptosis inhibitor 5                                  | API5    | Homo sapiens |
| 333       | amyloid beta (A4) precursor-like protein 1                          | APLP1   | Homo sapiens |
| 334       | amyloid beta (A4) precursor-like protein 2                          | APLP2   | Homo sapiens |
| 335       | apolipoprotein A-I                                                  | APOA1   | Homo sapiens |
| 338       | apolipoprotein B (including Ag(x) antigen)                          | APOB    | Homo sapiens |
| 339       | apolipoprotein B mRNA editing enzyme, catalytic polypeptide 1       | APOBEC1 | Homo sapiens |
| 345       | apolipoprotein C-III                                                | APOC3   | Homo sapiens |
| 346       | apolipoprotein C-IV                                                 | APOC4   | Homo sapiens |
| 347       | apolipoprotein D                                                    | APOD    | Homo sapiens |
| 100129500 | hypothetical LOC100129500; apolipoprotein E                         | APOE    | Homo sapiens |
| 348       | hypothetical LOC100129500; apolipoprotein E                         | APOE    | Homo sapiens |
| 23780     | apolipoprotein L, 2                                                 | APOL2   | Homo sapiens |
| 55937     | apolipoprotein M                                                    | APOM    | Homo sapiens |
| 351       | amyloid beta (A4) precursor protein                                 | APP     | Homo sapiens |
| 10513     | amyloid beta precursor protein (cytoplasmic tail) binding protein 2 | APPBP2  | Homo sapiens |
| 353       | adenine phosphoribosyltransferase                                   | APRT    | Homo sapiens |
| 358       | aquaporin 1 (Colton blood group)                                    | AQP1    | Homo sapiens |

|           |                                                                                      |          |              |
|-----------|--------------------------------------------------------------------------------------|----------|--------------|
| 359       | aquaporin 2 (collecting duct)                                                        | AQP2     | Homo sapiens |
| 360       | aquaporin 3 (Gill blood group)                                                       | AQP3     | Homo sapiens |
| 361       | aquaporin 4                                                                          | AQP4     | Homo sapiens |
| 363       | aquaporin 6, kidney specific                                                         | AQP6     | Homo sapiens |
| 364       | aquaporin 7                                                                          | AQP7     | Homo sapiens |
| 366       | aquaporin 9                                                                          | AQP9     | Homo sapiens |
| 367       | androgen receptor                                                                    | AR       | Homo sapiens |
| 372       | archain 1                                                                            | ARCN1    | Homo sapiens |
| 375       | ADP-ribosylation factor 1                                                            | ARF1     | Homo sapiens |
| 377       | ADP-ribosylation factor 3                                                            | ARF3     | Homo sapiens |
| 378       | ADP-ribosylation factor 4                                                            | ARF4     | Homo sapiens |
| 381       | ADP-ribosylation factor 5                                                            | ARF5     | Homo sapiens |
| 382       | ADP-ribosylation factor 6                                                            | ARF6     | Homo sapiens |
| 10565     | ADP-ribosylation factor guanine nucleotide-exchange factor 1(brefeldin A-inhibited)  | ARFGEF1  | Homo sapiens |
| 10564     | ADP-ribosylation factor guanine nucleotide-exchange factor 2 (brefeldin A-inhibited) | ARFGEF2  | Homo sapiens |
| 27236     | ADP-ribosylation factor interacting protein 1                                        | ARFIP1   | Homo sapiens |
| 23647     | ADP-ribosylation factor interacting protein 2                                        | ARFIP2   | Homo sapiens |
| 10139     | ADP-ribosylation factor related protein 1                                            | ARFRP1   | Homo sapiens |
| 383       | arginase, liver                                                                      | ARG1     | Homo sapiens |
| 384       | arginase, type II                                                                    | ARG2     | Homo sapiens |
| 392       | Rho GTPase activating protein 1                                                      | ARHGAP1  | Homo sapiens |
| 23092     | Rho GTPase activating protein 26                                                     | ARHGAP26 | Homo sapiens |
| 394       | Rho GTPase activating protein 5                                                      | ARHGAP5  | Homo sapiens |
| 395       | Rho GTPase activating protein 6                                                      | ARHGAP6  | Homo sapiens |
| 397       | Rho GDP dissociation inhibitor (GDI) beta                                            | ARHGDIB  | Homo sapiens |
| 398       | Rho GDP dissociation inhibitor (GDI) gamma                                           | ARHGDIG  | Homo sapiens |
| 9138      | Rho guanine nucleotide exchange factor (GEF) 1                                       | ARHGEF1  | Homo sapiens |
| 9826      | Rho guanine nucleotide exchange factor (GEF) 11                                      | ARHGEF11 | Homo sapiens |
| 27237     | Rho guanine exchange factor (GEF) 16                                                 | ARHGEF16 | Homo sapiens |
| 50650     | Rho guanine nucleotide exchange factor (GEF) 3                                       | ARHGEF3  | Homo sapiens |
| 50649     | Rho guanine nucleotide exchange factor (GEF) 4                                       | ARHGEF4  | Homo sapiens |
| 7984      | Rho guanine nucleotide exchange factor (GEF) 5                                       | ARHGEF5  | Homo sapiens |
| 9459      | Rac/Cdc42 guanine nucleotide exchange factor (GEF) 6                                 | ARHGEF6  | Homo sapiens |
| 8874      | Rho guanine nucleotide exchange factor (GEF) 7                                       | ARHGEF7  | Homo sapiens |
| 100134381 | Cdc42 guanine nucleotide exchange factor (GEF) 9; hypothetical protein LOC100134381  | ARHGEF9  | Homo sapiens |
| 23229     | Cdc42 guanine nucleotide exchange factor (GEF) 9; hypothetical protein LOC100134381  | ARHGEF9  | Homo sapiens |
| 8289      | AT rich interactive domain 1A (SWI-like)                                             | ARID1A   | Homo sapiens |
| 25820     | ariadne homolog, ubiquitin-conjugating enzyme E2 binding protein, 1 (Drosophila)     | ARIH1    | Homo sapiens |
| 10425     | ariadne homolog 2 (Drosophila)                                                       | ARIH2    | Homo sapiens |
| 400       | ADP-ribosylation factor-like 1                                                       | ARL1     | Homo sapiens |
| 23568     | ADP-ribosylation factor-like 2 binding protein                                       | ARL2BP   | Homo sapiens |
| 403       | ADP-ribosylation factor-like 3                                                       | ARL3     | Homo sapiens |

|        |                                                                                                                    |         |              |
|--------|--------------------------------------------------------------------------------------------------------------------|---------|--------------|
| 10550  | ADP-ribosylation-like factor 6 interacting protein 5                                                               | ARL6IP5 | Homo sapiens |
| 25852  | armadillo repeat containing 8                                                                                      | ARMC8   | Homo sapiens |
| 405    | aryl hydrocarbon receptor nuclear translocator                                                                     | ARNT    | Homo sapiens |
| 406    | aryl hydrocarbon receptor nuclear translocator-like                                                                | ARNTL   | Homo sapiens |
| 10552  | actin related protein 2/3 complex, subunit 1A, 41kDa                                                               | ARPC1A  | Homo sapiens |
| 10109  | actin related protein 2/3 complex, subunit 2, 34kDa                                                                | ARPC2   | Homo sapiens |
| 10092  | actin related protein 2/3 complex, subunit 5, 16kDa                                                                | ARPC5   | Homo sapiens |
| 407    | arrestin 3, retinal (X-arrestin)                                                                                   | ARR3    | Homo sapiens |
| 410    | arylsulfatase A                                                                                                    | ARSA    | Homo sapiens |
| 411    | arylsulfatase B                                                                                                    | ARSB    | Homo sapiens |
| 415    | arylsulfatase E (chondrodysplasia punctata 1)                                                                      | ARSE    | Homo sapiens |
| 416    | arylsulfatase F                                                                                                    | ARSF    | Homo sapiens |
| 421    | armadillo repeat gene deletes in velocardiofacial syndrome                                                         | ARVCF   | Homo sapiens |
| 427    | N-acylsphingosine amidohydrolase (acid ceramidase) 1                                                               | ASAH1   | Homo sapiens |
| 51666  | ankyrin repeat and SOCS box-containing 4                                                                           | ASB4    | Homo sapiens |
| 10973  | activating signal cointegrator 1 complex subunit 3                                                                 | ASCC3   | Homo sapiens |
| 429    | achaete-scute complex homolog 1 (Drosophila)                                                                       | ASCL1   | Homo sapiens |
| 430    | achaete-scute complex homolog 2 (Drosophila)                                                                       | ASCL2   | Homo sapiens |
| 432    | asialoglycoprotein receptor 1                                                                                      | ASGR1   | Homo sapiens |
| 433    | asialoglycoprotein receptor 2                                                                                      | ASGR2   | Homo sapiens |
| 9070   | ash2 (absent, small, or homeotic)-like (Drosophila)                                                                | ASH2L   | Homo sapiens |
| 434    | agouti signaling protein, nonagouti homolog (mouse)                                                                | ASIP    | Homo sapiens |
| 435    | argininosuccinate lyase                                                                                            | ASL     | Homo sapiens |
| 8623   | acetylserotonin O-methyltransferase-like                                                                           | ASMTL   | Homo sapiens |
| 439    | arsA arsenite transporter, ATP-binding, homolog 1 (bacterial)                                                      | ASNA1   | Homo sapiens |
| 440    | asparagine synthetase                                                                                              | ASNS    | Homo sapiens |
| 443    | aspartoacylase (Canavan disease)                                                                                   | ASPA    | Homo sapiens |
| 171023 | additional sex combs like 1 (Drosophila)                                                                           | ASXL1   | Homo sapiens |
| 466    | activating transcription factor 1                                                                                  | ATF1    | Homo sapiens |
| 1386   | activating transcription factor 2                                                                                  | ATF2    | Homo sapiens |
| 467    | activating transcription factor 3                                                                                  | ATF3    | Homo sapiens |
| 22809  | activating transcription factor 5                                                                                  | ATF5    | Homo sapiens |
| 55729  | activating transcription factor 7 interacting protein                                                              | ATF7IP  | Homo sapiens |
| 471    | 5-aminoimidazole-4-carboxamide ribonucleotide formyltransferase/IMP cyclohydrolase                                 | ATIC    | Homo sapiens |
| 651610 | similar to Serine-protein kinase ATM (Ataxia telangiectasia mutated) (A-T, mutated); ataxia telangiectasia mutated | ATM     | Homo sapiens |
| 472    | similar to Serine-protein kinase ATM (Ataxia telangiectasia mutated) (A-T, mutated); ataxia telangiectasia mutated | ATM     | Homo sapiens |
| 475    | ATX1 antioxidant protein 1 homolog (yeast)                                                                         | ATOX1   | Homo sapiens |
| 477    | ATPase, Na <sup>+</sup> /K <sup>+</sup> transporting, alpha 2 (+) polypeptide                                      | ATP1A2  | Homo sapiens |
| 483    | ATPase, Na <sup>+</sup> /K <sup>+</sup> transporting, beta 3 polypeptide                                           | ATP1B3  | Homo sapiens |
| 488    | ATPase, Ca <sup>++</sup> transporting, cardiac muscle, slow twitch 2                                               | ATP2A2  | Homo sapiens |
| 489    | ATPase, Ca <sup>++</sup> transporting, ubiquitous                                                                  | ATP2A3  | Homo sapiens |
| 490    | ATPase, Ca <sup>++</sup> transporting, plasma membrane 1                                                           | ATP2B1  | Homo sapiens |
| 491    | ATPase, Ca <sup>++</sup> transporting, plasma membrane 2                                                           | ATP2B2  | Homo sapiens |
| 492    | ATPase, Ca <sup>++</sup> transporting, plasma membrane 3                                                           | ATP2B3  | Homo sapiens |



|        |                                                                                                   |          |              |
|--------|---------------------------------------------------------------------------------------------------|----------|--------------|
| 493    | ATPase, Ca <sup>++</sup> transporting, plasma membrane 4                                          | ATP2B4   | Homo sapiens |
| 27032  | ATPase, Ca <sup>++</sup> transporting, type 2C, member 1                                          | ATP2C1   | Homo sapiens |
| 495    | ATPase, H <sup>+</sup> /K <sup>+</sup> exchanging, alpha polypeptide                              | ATP4A    | Homo sapiens |
| 496    | ATPase, H <sup>+</sup> /K <sup>+</sup> exchanging, beta polypeptide                               | ATP4B    | Homo sapiens |
| 509    | ATP synthase, H <sup>+</sup> transporting, mitochondrial F1 complex, gamma polypeptide 1          | ATP5C1   | Homo sapiens |
| 513    | ATP synthase, H <sup>+</sup> transporting, mitochondrial F1 complex, delta subunit                | ATP5D    | Homo sapiens |
| 515    | ATP synthase, H <sup>+</sup> transporting, mitochondrial F0 complex, subunit B1                   | ATP5F1   | Homo sapiens |
| 516    | ATP synthase, H <sup>+</sup> transporting, mitochondrial F0 complex, subunit C1 (subunit 9)       | ATP5G1   | Homo sapiens |
| 517    | ATP synthase, H <sup>+</sup> transporting, mitochondrial F0 complex, subunit C2 (subunit 9)       | ATP5G2   | Homo sapiens |
| 518    | ATP synthase, H <sup>+</sup> transporting, mitochondrial F0 complex, subunit C3 (subunit 9)       | ATP5G3   | Homo sapiens |
| 10476  | ATP synthase, H <sup>+</sup> transporting, mitochondrial F0 complex, subunit d                    | ATP5H    | Homo sapiens |
| 521    | ATP synthase, H <sup>+</sup> transporting, mitochondrial F0 complex, subunit E                    | ATP5I    | Homo sapiens |
| 522    | ATP synthase, H <sup>+</sup> transporting, mitochondrial F0 complex, subunit F6                   | ATP5J    | Homo sapiens |
| 9551   | ATP synthase, H <sup>+</sup> transporting, mitochondrial F0 complex, subunit F2                   | ATP5J2   | Homo sapiens |
| 10632  | ATP synthase, H <sup>+</sup> transporting, mitochondrial F0 complex, subunit G                    | ATP5L    | Homo sapiens |
| 10159  | ATPase, H <sup>+</sup> transporting, lysosomal accessory protein 2                                | ATP6AP2  | Homo sapiens |
| 23545  | ATPase, H <sup>+</sup> transporting, lysosomal V0 subunit a2                                      | ATP6VOA2 | Homo sapiens |
| 533    | ATPase, H <sup>+</sup> transporting, lysosomal 21kDa, V0 subunit b                                | ATP6VOB  | Homo sapiens |
| 9114   | ATPase, H <sup>+</sup> transporting, lysosomal 38kDa, V0 subunit d1                               | ATP6VOD1 | Homo sapiens |
| 528    | ATPase, H <sup>+</sup> transporting, lysosomal 42kDa, V1 subunit C1                               | ATP6V1C1 | Homo sapiens |
| 51382  | ATPase, H <sup>+</sup> transporting, lysosomal 34kDa, V1 subunit D                                | ATP6V1D  | Homo sapiens |
| 9296   | ATPase, H <sup>+</sup> transporting, lysosomal 14kDa, V1 subunit F                                | ATP6V1F  | Homo sapiens |
| 9550   | ATPase, H <sup>+</sup> transporting, lysosomal 13kDa, V1 subunit G1                               | ATP6V1G1 | Homo sapiens |
| 534    | ATPase, H <sup>+</sup> transporting, lysosomal 13kDa, V1 subunit G2                               | ATP6V1G2 | Homo sapiens |
| 51606  | ATPase, H <sup>+</sup> transporting, lysosomal 50/57kDa, V1 subunit H                             | ATP6V1H  | Homo sapiens |
| 540    | ATPase, Cu <sup>++</sup> transporting, beta polypeptide                                           | ATP7B    | Homo sapiens |
| 10396  | ATPase, aminophospholipid transporter (APLT), class I, type 8A, member 1                          | ATP8A1   | Homo sapiens |
| 5205   | ATPase, class I, type 8B, member 1                                                                | ATP8B1   | Homo sapiens |
| 148229 | ATPase, class I, type 8B, member 3                                                                | ATP8B3   | Homo sapiens |
| 10079  | ATPase, class II, type 9A                                                                         | ATP9A    | Homo sapiens |
| 374868 | ATPase, class II, type 9B                                                                         | ATP9B    | Homo sapiens |
| 651921 | ataxia telangiectasia and Rad3 related; similar to ataxia telangiectasia and Rad3 related protein | ATR      | Homo sapiens |
| 648152 | ataxia telangiectasia and Rad3 related; similar to ataxia telangiectasia and Rad3 related protein | ATR      | Homo sapiens |
| 545    | ataxia telangiectasia and Rad3 related; similar to ataxia telangiectasia and Rad3 related protein | ATR      | Homo sapiens |
| 8455   | attractin                                                                                         | ATRN     | Homo sapiens |
| 546    | alpha thalassemia/mental retardation syndrome X-linked (RAD54 homolog, <i>S. cerevisiae</i> )     | ATRX     | Homo sapiens |
| 6310   | ataxin 1                                                                                          | ATXN1    | Homo sapiens |
| 25814  | ataxin 10                                                                                         | ATXN10   | Homo sapiens |

|        |                                                                                                                              |         |              |
|--------|------------------------------------------------------------------------------------------------------------------------------|---------|--------------|
| 549    | AU RNA binding protein/enoyl-Coenzyme A hydratase                                                                            | AUH     | Homo sapiens |
| 9212   | aurora kinase B                                                                                                              | AURKB   | Homo sapiens |
| 6795   | aurora kinase C                                                                                                              | AURKC   | Homo sapiens |
| 10677  | advillin                                                                                                                     | AVIL    | Homo sapiens |
| 552    | arginine vasopressin receptor 1A                                                                                             | AVPR1A  | Homo sapiens |
| 554    | arginine vasopressin receptor 2                                                                                              | AVPR2   | Homo sapiens |
| 8312   | axin 1                                                                                                                       | AXIN1   | Homo sapiens |
| 8313   | axin 2                                                                                                                       | AXIN2   | Homo sapiens |
| 558    | AXL receptor tyrosine kinase                                                                                                 | AXL     | Homo sapiens |
| 646282 | alpha-2-glycoprotein 1, zinc-binding pseudogene 1; alpha-2-glycoprotein 1, zinc-binding                                      | AZGP1   | Homo sapiens |
| 563    | alpha-2-glycoprotein 1, zinc-binding pseudogene 1; alpha-2-glycoprotein 1, zinc-binding                                      | AZGP1   | Homo sapiens |
| 566    | azurocidin 1                                                                                                                 | AZU1    | Homo sapiens |
| 567    | beta-2-microglobulin                                                                                                         | B2M     | Homo sapiens |
| 8707   | UDP-Gal:betaGlcNAc beta 1,3-galactosyltransferase, polypeptide 2                                                             | B3GALT2 | Homo sapiens |
| 26229  | beta-1,3-glucuronyltransferase 3 (glucuronosyltransferase I)                                                                 | B3GAT3  | Homo sapiens |
| 11041  | UDP-GlcNAc:betaGal beta-1,3-N-acetylglucosaminyltransferase 1; UDP-GlcNAc:betaGal beta-1,3-N-acetylglucosaminyltransferase 2 | B3GNT1  | Homo sapiens |
| 10678  | UDP-GlcNAc:betaGal beta-1,3-N-acetylglucosaminyltransferase 1; UDP-GlcNAc:betaGal beta-1,3-N-acetylglucosaminyltransferase 2 | B3GNT1  | Homo sapiens |
| 8703   | UDP-Gal:betaGlcNAc beta 1,4- galactosyltransferase, polypeptide 3                                                            | B4GALT3 | Homo sapiens |
| 8702   | UDP-Gal:betaGlcNAc beta 1,4- galactosyltransferase, polypeptide 4                                                            | B4GALT4 | Homo sapiens |
| 25825  | beta-site APP-cleaving enzyme 2                                                                                              | BACE2   | Homo sapiens |
| 571    | BTB and CNC homology 1, basic leucine zipper transcription factor 1                                                          | BACH1   | Homo sapiens |
| 573    | BCL2-associated athanogene                                                                                                   | BAG1    | Homo sapiens |
| 9531   | BCL2-associated athanogene 3                                                                                                 | BAG3    | Homo sapiens |
| 9530   | BCL2-associated athanogene 4                                                                                                 | BAG4    | Homo sapiens |
| 9529   | BCL2-associated athanogene 5                                                                                                 | BAG5    | Homo sapiens |
| 575    | brain-specific angiogenesis inhibitor 1                                                                                      | BAI1    | Homo sapiens |
| 576    | brain-specific angiogenesis inhibitor 2                                                                                      | BAI2    | Homo sapiens |
| 10458  | BAI1-associated protein 2                                                                                                    | BAIAP2  | Homo sapiens |
| 600    | BCL2-antagonist/killer 1; BCL2-like 7 pseudogene 1                                                                           | BAK1    | Homo sapiens |
| 578    | BCL2-antagonist/killer 1; BCL2-like 7 pseudogene 1                                                                           | BAK1    | Homo sapiens |
| 25805  | hypothetical LOC729590; BMP and activin membrane-bound inhibitor homolog (Xenopus laevis)                                    | BAMBI   | Homo sapiens |
| 729590 | hypothetical LOC729590; BMP and activin membrane-bound inhibitor homolog (Xenopus laevis)                                    | BAMBI   | Homo sapiens |
| 8314   | BRCA1 associated protein-1 (ubiquitin carboxy-terminal hydrolase)                                                            | BAP1    | Homo sapiens |
| 580    | BRCA1 associated RING domain 1                                                                                               | BARD1   | Homo sapiens |
| 8538   | BARX homeobox 2                                                                                                              | BARX2   | Homo sapiens |
| 10409  | brain abundant, membrane attached signal protein 1                                                                           | BASP1   | Homo sapiens |
| 7916   | HLA-B associated transcript 2                                                                                                | BAT2    | Homo sapiens |
| 7917   | HLA-B associated transcript 3                                                                                                | BAT3    | Homo sapiens |
| 10538  | basic leucine zipper transcription factor, ATF-like                                                                          | BATF    | Homo sapiens |
| 581    | BCL2-associated X protein                                                                                                    | BAX     | Homo sapiens |
| 11177  | bromodomain adjacent to zinc finger domain, 1A                                                                               | BAZ1A   | Homo sapiens |

|           |                                                                                         |         |              |
|-----------|-----------------------------------------------------------------------------------------|---------|--------------|
| 9031      | bromodomain adjacent to zinc finger domain, 1B                                          | BAZ1B   | Homo sapiens |
| 8424      | butyrobetaine (gamma), 2-oxoglutarate dioxygenase (gamma-butyrobetaine hydroxylase) 1   | BBOX1   | Homo sapiens |
| 56987     | bobby sox homolog (Drosophila)                                                          | BBX     | Homo sapiens |
| 63827     | brevican                                                                                | BCAN    | Homo sapiens |
| 10134     | B-cell receptor-associated protein 31                                                   | BCAP31  | Homo sapiens |
| 8412      | breast cancer anti-estrogen resistance 3                                                | BCAR3   | Homo sapiens |
| 8537      | breast carcinoma amplified sequence 1                                                   | BCAS1   | Homo sapiens |
| 10286     | breast carcinoma amplified sequence 2                                                   | BCAS2   | Homo sapiens |
| 586       | branched chain aminotransferase 1, cytosolic                                            | BCAT1   | Homo sapiens |
| 587       | branched chain aminotransferase 2, mitochondrial                                        | BCAT2   | Homo sapiens |
| 594       | branched chain keto acid dehydrogenase E1, beta polypeptide                             | BCKDHB  | Homo sapiens |
| 8915      | B-cell CLL/lymphoma 10; hypothetical LOC646626                                          | BCL10   | Homo sapiens |
| 646626    | B-cell CLL/lymphoma 10; hypothetical LOC646626                                          | BCL10   | Homo sapiens |
| 53335     | B-cell CLL/lymphoma 11A (zinc finger protein)                                           | BCL11A  | Homo sapiens |
| 596       | B-cell CLL/lymphoma 2                                                                   | BCL2    | Homo sapiens |
| 597       | BCL2-related protein A1                                                                 | BCL2A1  | Homo sapiens |
| 598       | BCL2-like 1                                                                             | BCL2L1  | Homo sapiens |
| 10018     | BCL2-like 11 (apoptosis facilitator)                                                    | BCL2L11 | Homo sapiens |
| 599       | BCL2-like 2                                                                             | BCL2L2  | Homo sapiens |
| 602       | B-cell CLL/lymphoma 3                                                                   | BCL3    | Homo sapiens |
| 604       | B-cell CLL/lymphoma 6                                                                   | BCL6    | Homo sapiens |
| 9275      | B-cell CLL/lymphoma 7B                                                                  | BCL7B   | Homo sapiens |
| 607       | B-cell CLL/lymphoma 9                                                                   | BCL9    | Homo sapiens |
| 54880     | BCL6 co-repressor                                                                       | BCOR    | Homo sapiens |
| 617       | BCS1-like (yeast)                                                                       | BCS1L   | Homo sapiens |
| 623       | bradykinin receptor B1                                                                  | BDKRB1  | Homo sapiens |
| 624       | bradykinin receptor B2                                                                  | BDKRB2  | Homo sapiens |
| 627       | brain-derived neurotrophic factor                                                       | BDNF    | Homo sapiens |
| 8678      | beclin 1, autophagy related                                                             | BECN1   | Homo sapiens |
| 10282     | hypothetical protein LOC100128542; blocked early in transport 1 homolog (S. cerevisiae) | BET1    | Homo sapiens |
| 100128542 | hypothetical protein LOC100128542; blocked early in transport 1 homolog (S. cerevisiae) | BET1    | Homo sapiens |
| 51283     | bifunctional apoptosis regulator                                                        | BFAR    | Homo sapiens |
| 631       | beaded filament structural protein 1, filensin                                          | BFSP1   | Homo sapiens |
| 8419      | beaded filament structural protein 2, phakinin                                          | BFSP2   | Homo sapiens |
| 11243     | bone gamma-carboxyglutamate (gla) protein; polyamine-modulated factor 1                 | BGLAP   | Homo sapiens |
| 632       | bone gamma-carboxyglutamate (gla) protein; polyamine-modulated factor 1                 | BGLAP   | Homo sapiens |
| 633       | biglycan                                                                                | BGN     | Homo sapiens |
| 635       | betaine-homocysteine methyltransferase                                                  | BHMT    | Homo sapiens |
| 636       | bicaudal D homolog 1 (Drosophila)                                                       | BICD1   | Homo sapiens |
| 23299     | bicaudal D homolog 2 (Drosophila)                                                       | BICD2   | Homo sapiens |
| 637       | BH3 interacting domain death agonist                                                    | BID     | Homo sapiens |
| 329       | baculoviral IAP repeat-containing 2                                                     | BIRC2   | Homo sapiens |

|           |                                                                                                  |         |              |
|-----------|--------------------------------------------------------------------------------------------------|---------|--------------|
| 330       | baculoviral IAP repeat-containing 3                                                              | BIRC3   | Homo sapiens |
| 332       | baculoviral IAP repeat-containing 5                                                              | BIRC5   | Homo sapiens |
| 10904     | bladder cancer associated protein                                                                | BLCAP   | Homo sapiens |
| 640       | B lymphoid tyrosine kinase                                                                       | BLK     | Homo sapiens |
| 641       | Bloom syndrome, RecQ helicase-like                                                               | BLM     | Homo sapiens |
| 642       | bleomycin hydrolase                                                                              | BLMH    | Homo sapiens |
| 29760     | B-cell linker                                                                                    | BLNK    | Homo sapiens |
| 2647      | biogenesis of lysosomal organelles complex-1, subunit 1                                          | BLOC1S1 | Homo sapiens |
| 645       | biliverdin reductase B (flavin reductase (NADPH))                                                | BLVRB   | Homo sapiens |
| 8548      | basic leucine zipper nuclear factor 1                                                            | BLZF1   | Homo sapiens |
| 649       | bone morphogenetic protein 1                                                                     | BMP1    | Homo sapiens |
| 650       | bone morphogenetic protein 2                                                                     | BMP2    | Homo sapiens |
| 55589     | BMP2 inducible kinase                                                                            | BMP2K   | Homo sapiens |
| 652       | bone morphogenetic protein 4                                                                     | BMP4    | Homo sapiens |
| 653       | bone morphogenetic protein 5                                                                     | BMP5    | Homo sapiens |
| 655       | bone morphogenetic protein 7                                                                     | BMP7    | Homo sapiens |
| 353500    | bone morphogenetic protein 8a                                                                    | BMP8A   | Homo sapiens |
| 662       | BCL2/adenovirus E1B 19kDa interacting protein 1                                                  | BNIP1   | Homo sapiens |
| 66037     | bol, boule-like (Drosophila)                                                                     | BOLL    | Homo sapiens |
| 669       | 2,3-bisphosphoglycerate mutase                                                                   | BPGM    | Homo sapiens |
| 671       | bactericidal/permeability-increasing protein                                                     | BPI     | Homo sapiens |
| 673       | v-raf murine sarcoma viral oncogene homolog B1                                                   | BRAF    | Homo sapiens |
| 672       | breast cancer 1, early onset                                                                     | BRCA1   | Homo sapiens |
| 675       | breast cancer 2, early onset                                                                     | BRCA2   | Homo sapiens |
| 23774     | bromodomain containing 1                                                                         | BRD1    | Homo sapiens |
| 6046      | bromodomain containing 2                                                                         | BRD2    | Homo sapiens |
| 23476     | bromodomain containing 4                                                                         | BRD4    | Homo sapiens |
| 10902     | bromodomain containing 8                                                                         | BRD8    | Homo sapiens |
| 676       | bromodomain, testis-specific; hCG1811337                                                         | BRDT    | Homo sapiens |
| 643486    | bromodomain, testis-specific; hCG1811337                                                         | BRDT    | Homo sapiens |
| 9577      | brain and reproductive organ-expressed (TNFRSF1A modulator)                                      | BRE     | Homo sapiens |
| 2972      | BRF1 homolog, subunit of RNA polymerase III transcription initiation factor IIIB (S. cerevisiae) | BRF1    | Homo sapiens |
| 683       | bone marrow stromal cell antigen 1                                                               | BST1    | Homo sapiens |
| 684       | NPC-A-7; bone marrow stromal cell antigen 2                                                      | BST2    | Homo sapiens |
| 100129681 | NPC-A-7; bone marrow stromal cell antigen 2                                                      | BST2    | Homo sapiens |
| 55643     | BTB (POZ) domain containing 2                                                                    | BTBD2   | Homo sapiens |
| 685       | betacellulin                                                                                     | BTC     | Homo sapiens |
| 686       | biotinidase                                                                                      | BTD     | Homo sapiens |
| 689       | basic transcription factor 3; basic transcription factor 3, like 1 pseudogene                    | BTF3    | Homo sapiens |
| 690       | basic transcription factor 3; basic transcription factor 3, like 1 pseudogene                    | BTF3    | Homo sapiens |
| 694       | B-cell translocation gene 1, anti-proliferative                                                  | BTG1    | Homo sapiens |
| 7832      | BTG family, member 2                                                                             | BTG2    | Homo sapiens |
| 54766     | B-cell translocation gene 4                                                                      | BTG4    | Homo sapiens |
| 695       | Bruton agammaglobulinemia tyrosine kinase                                                        | BTK     | Homo sapiens |

|           |                                                                                               |           |              |
|-----------|-----------------------------------------------------------------------------------------------|-----------|--------------|
| 11120     | butyrophilin, subfamily 2, member A1                                                          | BTN2A1    | Homo sapiens |
| 11119     | butyrophilin, subfamily 3, member A1                                                          | BTN3A1    | Homo sapiens |
| 11118     | butyrophilin, subfamily 3, member A2                                                          | BTN3A2    | Homo sapiens |
| 10384     | butyrophilin, subfamily 3, member A3                                                          | BTN3A3    | Homo sapiens |
| 10917     | butyrophilin-like 3                                                                           | BTNL3     | Homo sapiens |
| 8945      | beta-transducin repeat containing                                                             | BTRC      | Homo sapiens |
| 699       | budding uninhibited by benzimidazoles 1 homolog (yeast)                                       | BUB1      | Homo sapiens |
| 701       | budding uninhibited by benzimidazoles 1 homolog beta (yeast)                                  | BUB1B     | Homo sapiens |
| 9184      | budding uninhibited by benzimidazoles 3 homolog (yeast)                                       | BUB3      | Homo sapiens |
| 705       | bystin-like                                                                                   | BYSL      | Homo sapiens |
| 11067     | chromosome 10 open reading frame 10                                                           | C10orf10  | Homo sapiens |
| 10974     | chromosome 10 open reading frame 116                                                          | C10orf116 | Homo sapiens |
| 26148     | chromosome 10 open reading frame 12                                                           | C10orf12  | Homo sapiens |
| 196740    | chromosome 10 open reading frame 72                                                           | C10orf72  | Homo sapiens |
| 9556      | chromosome 14 open reading frame 2                                                            | C14orf2   | Homo sapiens |
| 122616    | chromosome 14 open reading frame 79                                                           | C14orf79  | Homo sapiens |
| 753       | chromosome 18 open reading frame 1                                                            | C18orf1   | Homo sapiens |
| 25941     | chromosome 18 open reading frame 10                                                           | C18orf10  | Homo sapiens |
| 91304     | chromosome 19 open reading frame 6                                                            | C19orf6   | Homo sapiens |
| 9473      | chromosome 1 open reading frame 38                                                            | C1orf38   | Homo sapiens |
| 51430     | chromosome 1 open reading frame 9                                                             | C1orf9    | Homo sapiens |
| 10882     | complement component 1, q subcomponent-like 1                                                 | C1QL1     | Homo sapiens |
| 114898    | C1q and tumor necrosis factor related protein 2                                               | C1QTNF2   | Homo sapiens |
| 715       | complement component 1, r subcomponent                                                        | C1R       | Homo sapiens |
| 717       | complement component 2                                                                        | C2        | Homo sapiens |
| 51526     | chromosome 20 open reading frame 111                                                          | C20orf111 | Homo sapiens |
| 718       | similar to Complement C3 precursor; complement component 3; hypothetical protein LOC100133511 | C3        | Homo sapiens |
| 100133511 | similar to Complement C3 precursor; complement component 3; hypothetical protein LOC100133511 | C3        | Homo sapiens |
| 653879    | similar to Complement C3 precursor; complement component 3; hypothetical protein LOC100133511 | C3        | Homo sapiens |
| 719       | complement component 3a receptor 1                                                            | C3AR1     | Homo sapiens |
| 722       | complement component 4 binding protein, alpha                                                 | C4BPA     | Homo sapiens |
| 725       | complement component 4 binding protein, beta                                                  | C4BPB     | Homo sapiens |
| 727       | complement component 5                                                                        | C5        | Homo sapiens |
| 9315      | chromosome 5 open reading frame 13                                                            | C5orf13   | Homo sapiens |
| 56951     | chromosome 5 open reading frame 15                                                            | C5orf15   | Homo sapiens |
| 10826     | chromosome 5 open reading frame 4                                                             | C5orf4    | Homo sapiens |
| 729       | complement component 6                                                                        | C6        | Homo sapiens |
| 10665     | chromosome 6 open reading frame 10                                                            | C6orf10   | Homo sapiens |
| 10591     | chromosome 6 open reading frame 108                                                           | C6orf108  | Homo sapiens |
| 221443    | chromosome 6 open reading frame 130                                                           | C6orf130  | Homo sapiens |
| 57150     | chromosome 6 open reading frame 162                                                           | C6orf162  | Homo sapiens |
| 732       | complement component 8, beta polypeptide                                                      | C8B       | Homo sapiens |
| 51490     | chromosome 9 open reading frame 114                                                           | C9orf114  | Homo sapiens |
| 84909     | chromosome 9 open reading frame 3                                                             | C9orf3    | Homo sapiens |

|       |                                                                                  |          |              |
|-------|----------------------------------------------------------------------------------|----------|--------------|
| 770   | carbonic anhydrase XI                                                            | CA11     | Homo sapiens |
| 771   | carbonic anhydrase XII                                                           | CA12     | Homo sapiens |
| 760   | carbonic anhydrase II                                                            | CA2      | Homo sapiens |
| 768   | carbonic anhydrase IX                                                            | CA9      | Homo sapiens |
| 81617 | calcium binding protein 39-like                                                  | CAB39L   | Homo sapiens |
| 9478  | calcium binding protein 1                                                        | CABP1    | Homo sapiens |
| 773   | calcium channel, voltage-dependent, P/Q type, alpha 1A subunit                   | CACNA1A  | Homo sapiens |
| 776   | calcium channel, voltage-dependent, L type, alpha 1D subunit                     | CACNA1D  | Homo sapiens |
| 777   | calcium channel, voltage-dependent, R type, alpha 1E subunit                     | CACNA1E  | Homo sapiens |
| 8912  | calcium channel, voltage-dependent, T type, alpha 1H subunit                     | CACNA1H  | Homo sapiens |
| 781   | calcium channel, voltage-dependent, alpha 2/delta subunit 1                      | CACNA2D1 | Homo sapiens |
| 9254  | calcium channel, voltage-dependent, alpha 2/delta subunit 2                      | CACNA2D2 | Homo sapiens |
| 784   | calcium channel, voltage-dependent, beta 3 subunit                               | CACNB3   | Homo sapiens |
| 785   | calcium channel, voltage-dependent, beta 4 subunit                               | CACNB4   | Homo sapiens |
| 790   | carbamoyl-phosphate synthetase 2, aspartate transcarbamylase, and dihydroorotase | CAD      | Homo sapiens |
| 8618  | Ca <sup>++</sup> -dependent secretion activator                                  | CADPS    | Homo sapiens |
| 793   | calbindin 1, 28kDa                                                               | CALB1    | Homo sapiens |
| 10203 | calcitonin receptor-like                                                         | CALCRL   | Homo sapiens |
| 800   | caldesmon 1                                                                      | CALD1    | Homo sapiens |
| 811   | calreticulin                                                                     | CALR     | Homo sapiens |
| 813   | calumenin                                                                        | CALU     | Homo sapiens |
| 8536  | calcium/calmodulin-dependent protein kinase I                                    | CAMK1    | Homo sapiens |
| 815   | calcium/calmodulin-dependent protein kinase II alpha                             | CAMK2A   | Homo sapiens |
| 816   | calcium/calmodulin-dependent protein kinase II beta                              | CAMK2B   | Homo sapiens |
| 818   | calcium/calmodulin-dependent protein kinase II gamma                             | CAMK2G   | Homo sapiens |
| 814   | calcium/calmodulin-dependent protein kinase IV                                   | CAMK4    | Homo sapiens |
| 10645 | calcium/calmodulin-dependent protein kinase kinase 2, beta                       | CAMKK2   | Homo sapiens |
| 819   | calcium modulating ligand                                                        | CAMLG    | Homo sapiens |
| 820   | cathelicidin antimicrobial peptide                                               | CAMP     | Homo sapiens |
| 23125 | calmodulin binding transcription activator 2                                     | CAMTA2   | Homo sapiens |
| 821   | calnexin                                                                         | CANX     | Homo sapiens |
| 10487 | CAP, adenylate cyclase-associated protein 1 (yeast)                              | CAP1     | Homo sapiens |
| 10486 | CAP, adenylate cyclase-associated protein, 2 (yeast)                             | CAP2     | Homo sapiens |
| 822   | capping protein (actin filament), gelsolin-like                                  | CAPG     | Homo sapiens |
| 823   | calpain 1, (mu/I) large subunit                                                  | CAPN1    | Homo sapiens |
| 11132 | calpain 10                                                                       | CAPN10   | Homo sapiens |
| 824   | calpain 2, (m/II) large subunit                                                  | CAPN2    | Homo sapiens |
| 726   | calpain 5                                                                        | CAPN5    | Homo sapiens |
| 827   | calpain 6                                                                        | CAPN6    | Homo sapiens |
| 23473 | calpain 7                                                                        | CAPN7    | Homo sapiens |
| 10753 | calpain 9                                                                        | CAPN9    | Homo sapiens |
| 826   | calpain, small subunit 1                                                         | CAPNS1   | Homo sapiens |
| 829   | capping protein (actin filament) muscle Z-line, alpha 1                          | CAPZA1   | Homo sapiens |
| 833   | cysteinyl-tRNA synthetase                                                        | CARS     | Homo sapiens |
| 22794 | cancer susceptibility candidate 3                                                | CASC3    | Homo sapiens |

|        |                                                                                     |         |              |
|--------|-------------------------------------------------------------------------------------|---------|--------------|
| 8573   | calcium/calmodulin-dependent serine protein kinase (MAGUK family)                   | CASK    | Homo sapiens |
| 834    | caspase 1, apoptosis-related cysteine peptidase (interleukin 1, beta, convertase)   | CASP1   | Homo sapiens |
| 843    | caspase 10, apoptosis-related cysteine peptidase                                    | CASP10  | Homo sapiens |
| 835    | caspase 2, apoptosis-related cysteine peptidase                                     | CASP2   | Homo sapiens |
| 836    | caspase 3, apoptosis-related cysteine peptidase                                     | CASP3   | Homo sapiens |
| 840    | caspase 7, apoptosis-related cysteine peptidase                                     | CASP7   | Homo sapiens |
| 841    | caspase 8, apoptosis-related cysteine peptidase                                     | CASP8   | Homo sapiens |
| 842    | caspase 9, apoptosis-related cysteine peptidase                                     | CASP9   | Homo sapiens |
| 845    | calsequestrin 2 (cardiac muscle)                                                    | CASQ2   | Homo sapiens |
| 846    | calcium-sensing receptor                                                            | CASR    | Homo sapiens |
| 831    | calpastatin                                                                         | CAST    | Homo sapiens |
| 847    | catalase                                                                            | CAT     | Homo sapiens |
| 857    | caveolin 1, caveolae protein, 22kDa                                                 | CAV1    | Homo sapiens |
| 858    | caveolin 2                                                                          | CAV2    | Homo sapiens |
| 859    | caveolin 3                                                                          | CAV3    | Homo sapiens |
| 10367  | calcium binding atopy-related autoantigen 1                                         | CBARA1  | Homo sapiens |
| 9139   | core-binding factor, runt domain, alpha subunit 2; translocated to, 2               | CBFA2T2 | Homo sapiens |
| 865    | core-binding factor, beta subunit                                                   | CBFB    | Homo sapiens |
| 867    | Cas-Br-M (murine) ecotropic retroviral transforming sequence                        | CBL     | Homo sapiens |
| 868    | Cas-Br-M (murine) ecotropic retroviral transforming sequence b                      | CBLB    | Homo sapiens |
| 869    | cerebellin 1 precursor                                                              | CBLN1   | Homo sapiens |
| 873    | carbonyl reductase 1                                                                | CBR1    | Homo sapiens |
| 874    | carbonyl reductase 3                                                                | CBR3    | Homo sapiens |
| 875    | cystathionine-beta-synthase                                                         | CBS     | Homo sapiens |
| 10951  | chromobox homolog 1 (HP1 beta homolog Drosophila )                                  | CBX1    | Homo sapiens |
| 644101 | similar to chromobox homolog 3; chromobox homolog 3 (HP1 gamma homolog, Drosophila) | CBX3    | Homo sapiens |
| 11335  | similar to chromobox homolog 3; chromobox homolog 3 (HP1 gamma homolog, Drosophila) | CBX3    | Homo sapiens |
| 8535   | chromobox homolog 4 (Pc class homolog, Drosophila)                                  | CBX4    | Homo sapiens |
| 23468  | chromobox homolog 5 (HP1 alpha homolog, Drosophila)                                 | CBX5    | Homo sapiens |
| 883    | cysteine conjugate-beta lyase, cytoplasmic                                          | CCBL1   | Homo sapiens |
| 8030   | coiled-coil domain containing 6                                                     | CCDC6   | Homo sapiens |
| 881    | calicin                                                                             | CCIN    | Homo sapiens |
| 887    | cholecystokinin B receptor                                                          | CCKBR   | Homo sapiens |
| 6346   | chemokine (C-C motif) ligand 1                                                      | CCL1    | Homo sapiens |
| 6356   | chemokine (C-C motif) ligand 11                                                     | CCL11   | Homo sapiens |
| 6357   | chemokine (C-C motif) ligand 13                                                     | CCL13   | Homo sapiens |
| 6360   | chemokine (C-C motif) ligand 16                                                     | CCL16   | Homo sapiens |
| 6362   | chemokine (C-C motif) ligand 18 (pulmonary and activation-regulated)                | CCL18   | Homo sapiens |
| 6363   | chemokine (C-C motif) ligand 19                                                     | CCL19   | Homo sapiens |
| 6347   | chemokine (C-C motif) ligand 2                                                      | CCL2    | Homo sapiens |
| 6364   | chemokine (C-C motif) ligand 20                                                     | CCL20   | Homo sapiens |
| 6368   | chemokine (C-C motif) ligand 23                                                     | CCL23   | Homo sapiens |
| 6369   | chemokine (C-C motif) ligand 24                                                     | CCL24   | Homo sapiens |

|        |                                                 |       |              |
|--------|-------------------------------------------------|-------|--------------|
| 6370   | chemokine (C-C motif) ligand 25                 | CCL25 | Homo sapiens |
| 10850  | chemokine (C-C motif) ligand 27                 | CCL27 | Homo sapiens |
| 56477  | chemokine (C-C motif) ligand 28                 | CCL28 | Homo sapiens |
| 6352   | chemokine (C-C motif) ligand 5                  | CCL5  | Homo sapiens |
| 6354   | chemokine (C-C motif) ligand 7                  | CCL7  | Homo sapiens |
| 6355   | chemokine (C-C motif) ligand 8                  | CCL8  | Homo sapiens |
| 8900   | cyclin A1                                       | CCNA1 | Homo sapiens |
| 890    | cyclin A2                                       | CCNA2 | Homo sapiens |
| 891    | cyclin B1                                       | CCNB1 | Homo sapiens |
| 9133   | cyclin B2                                       | CCNB2 | Homo sapiens |
| 595    | cyclin D1                                       | CCND1 | Homo sapiens |
| 894    | cyclin D2                                       | CCND2 | Homo sapiens |
| 896    | cyclin D3                                       | CCND3 | Homo sapiens |
| 898    | cyclin E1                                       | CCNE1 | Homo sapiens |
| 899    | cyclin F                                        | CCNF  | Homo sapiens |
| 900    | cyclin G1                                       | CCNG1 | Homo sapiens |
| 902    | cyclin H                                        | CCNH  | Homo sapiens |
| 10983  | cyclin I                                        | CCNI  | Homo sapiens |
| 904    | cyclin T1                                       | CCNT1 | Homo sapiens |
| 1230   | chemokine (C-C motif) receptor 1                | CCR1  | Homo sapiens |
| 729230 | chemokine (C-C motif) receptor 2                | CCR2  | Homo sapiens |
| 1234   | chemokine (C-C motif) receptor 5                | CCR5  | Homo sapiens |
| 81669  | cyclin L2; chemokine (C-C motif) receptor 6     | CCR6  | Homo sapiens |
| 1235   | cyclin L2; chemokine (C-C motif) receptor 6     | CCR6  | Homo sapiens |
| 51554  | chemokine (C-C motif) receptor-like 1           | CCRL1 | Homo sapiens |
| 9034   | chemokine (C-C motif) receptor-like 2           | CCRL2 | Homo sapiens |
| 10576  | chaperonin containing TCP1, subunit 2 (beta)    | CCT2  | Homo sapiens |
| 10575  | chaperonin containing TCP1, subunit 4 (delta)   | CCT4  | Homo sapiens |
| 22948  | chaperonin containing TCP1, subunit 5 (epsilon) | CCT5  | Homo sapiens |
| 908    | chaperonin containing TCP1, subunit 6A (zeta 1) | CCT6A | Homo sapiens |
| 10574  | chaperonin containing TCP1, subunit 7 (eta)     | CCT7  | Homo sapiens |
| 929    | CD14 molecule                                   | CD14  | Homo sapiens |
| 8763   | CD164 molecule, sialomucin                      | CD164 | Homo sapiens |
| 930    | CD19 molecule                                   | CD19  | Homo sapiens |
| 909    | CD1a molecule                                   | CD1A  | Homo sapiens |
| 910    | CD1b molecule                                   | CD1B  | Homo sapiens |
| 911    | CD1c molecule                                   | CD1C  | Homo sapiens |
| 912    | CD1d molecule                                   | CD1D  | Homo sapiens |
| 914    | CD2 molecule                                    | CD2   | Homo sapiens |
| 4345   | CD200 molecule                                  | CD200 | Homo sapiens |
| 30835  | CD209 molecule                                  | CD209 | Homo sapiens |
| 933    | CD22 molecule                                   | CD22  | Homo sapiens |
| 10666  | CD226 molecule                                  | CD226 | Homo sapiens |
| 940    | CD28 molecule                                   | CD28  | Homo sapiens |
| 23607  | CD2-associated protein                          | CD2AP | Homo sapiens |
| 945    | CD33 molecule                                   | CD33  | Homo sapiens |



|       |                                                                 |          |              |
|-------|-----------------------------------------------------------------|----------|--------------|
| 947   | CD34 molecule                                                   | CD34     | Homo sapiens |
| 948   | CD36 molecule (thrombospondin receptor)                         | CD36     | Homo sapiens |
| 951   | CD37 molecule                                                   | CD37     | Homo sapiens |
| 952   | CD38 molecule                                                   | CD38     | Homo sapiens |
| 915   | CD3d molecule, delta (CD3-TCR complex)                          | CD3D     | Homo sapiens |
| 916   | CD3e molecule, epsilon (CD3-TCR complex)                        | CD3E     | Homo sapiens |
| 917   | CD3g molecule, gamma (CD3-TCR complex)                          | CD3G     | Homo sapiens |
| 920   | CD4 molecule                                                    | CD4      | Homo sapiens |
| 961   | CD47 molecule                                                   | CD47     | Homo sapiens |
| 962   | CD48 molecule                                                   | CD48     | Homo sapiens |
| 921   | CD5 molecule                                                    | CD5      | Homo sapiens |
| 963   | CD53 molecule                                                   | CD53     | Homo sapiens |
| 965   | CD58 molecule                                                   | CD58     | Homo sapiens |
| 966   | CD59 molecule, complement regulatory protein                    | CD59     | Homo sapiens |
| 922   | CD5 molecule-like                                               | CD5L     | Homo sapiens |
| 923   | CD6 molecule                                                    | CD6      | Homo sapiens |
| 967   | CD63 molecule                                                   | CD63     | Homo sapiens |
| 974   | CD79b molecule, immunoglobulin-associated beta                  | CD79B    | Homo sapiens |
| 941   | CD80 molecule                                                   | CD80     | Homo sapiens |
| 975   | CD81 molecule                                                   | CD81     | Homo sapiens |
| 9308  | CD83 molecule                                                   | CD83     | Homo sapiens |
| 8832  | CD84 molecule                                                   | CD84     | Homo sapiens |
| 942   | CD86 molecule                                                   | CD86     | Homo sapiens |
| 925   | CD8a molecule                                                   | CD8A     | Homo sapiens |
| 928   | CD9 molecule                                                    | CD9      | Homo sapiens |
| 10225 | CD96 molecule                                                   | CD96     | Homo sapiens |
| 976   | CD97 molecule                                                   | CD97     | Homo sapiens |
| 4267  | CD99 molecule                                                   | CD99     | Homo sapiens |
| 978   | cytidine deaminase                                              | CDA      | Homo sapiens |
| 8556  | CDC14 cell division cycle 14 homolog A ( <i>S. cerevisiae</i> ) | CDC14A   | Homo sapiens |
| 8555  | CDC14 cell division cycle 14 homolog B ( <i>S. cerevisiae</i> ) | CDC14B   | Homo sapiens |
| 8881  | cell division cycle 16 homolog ( <i>S. cerevisiae</i> )         | CDC16    | Homo sapiens |
| 991   | cell division cycle 20 homolog ( <i>S. cerevisiae</i> )         | CDC20    | Homo sapiens |
| 8697  | cell division cycle 23 homolog ( <i>S. cerevisiae</i> )         | CDC23    | Homo sapiens |
| 993   | cell division cycle 25 homolog A ( <i>S. pombe</i> )            | CDC25A   | Homo sapiens |
| 995   | cell division cycle 25 homolog C ( <i>S. pombe</i> )            | CDC25C   | Homo sapiens |
| 996   | cell division cycle 27 homolog ( <i>S. cerevisiae</i> )         | CDC27    | Homo sapiens |
| 997   | cell division cycle 34 homolog ( <i>S. cerevisiae</i> )         | CDC34    | Homo sapiens |
| 11140 | cell division cycle 37 homolog ( <i>S. cerevisiae</i> )         | CDC37    | Homo sapiens |
| 51362 | cell division cycle 40 homolog ( <i>S. cerevisiae</i> )         | CDC40    | Homo sapiens |
| 8476  | CDC42 binding protein kinase alpha (DMPK-like)                  | CDC42BPA | Homo sapiens |
| 10602 | CDC42 effector protein (Rho GTPase binding) 3                   | CDC42EP3 | Homo sapiens |
| 988   | CDC5 cell division cycle 5-like ( <i>S. pombe</i> )             | CDC5L    | Homo sapiens |
| 990   | cell division cycle 6 homolog ( <i>S. cerevisiae</i> )          | CDC6     | Homo sapiens |
| 8317  | cell division cycle 7 homolog ( <i>S. cerevisiae</i> )          | CDC7     | Homo sapiens |
| 999   | cadherin 1, type 1, E-cadherin (epithelial)                     | CDH1     | Homo sapiens |

|       |                                                                                        |         |              |
|-------|----------------------------------------------------------------------------------------|---------|--------------|
| 1009  | cadherin 11, type 2, OB-cadherin (osteoblast)                                          | CDH11   | Homo sapiens |
| 1012  | cadherin 13, H-cadherin (heart)                                                        | CDH13   | Homo sapiens |
| 1013  | cadherin 15, type 1, M-cadherin (myotubule)                                            | CDH15   | Homo sapiens |
| 1014  | cadherin 16, KSP-cadherin                                                              | CDH16   | Homo sapiens |
| 1015  | cadherin 17, LI cadherin (liver-intestine)                                             | CDH17   | Homo sapiens |
| 28513 | cadherin 19, type 2                                                                    | CDH19   | Homo sapiens |
| 1000  | cadherin 2, type 1, N-cadherin (neuronal)                                              | CDH2    | Homo sapiens |
| 64405 | cadherin-like 22                                                                       | CDH22   | Homo sapiens |
| 60437 | cadherin-like 26                                                                       | CDH26   | Homo sapiens |
| 1001  | cadherin 3, type 1, P-cadherin (placental)                                             | CDH3    | Homo sapiens |
| 1002  | cadherin 4, type 1, R-cadherin (retinal)                                               | CDH4    | Homo sapiens |
| 1003  | cadherin 5, type 2 (vascular endothelium)                                              | CDH5    | Homo sapiens |
| 1004  | cadherin 6, type 2, K-cadherin (fetal kidney)                                          | CDH6    | Homo sapiens |
| 1006  | cadherin 8, type 2                                                                     | CDH8    | Homo sapiens |
| 10423 | CDP-diacylglycerol--inositol 3-phosphatidyltransferase (phosphatidylinositol synthase) | CDIPT   | Homo sapiens |
| 8558  | cyclin-dependent kinase 10                                                             | CDK10   | Homo sapiens |
| 1017  | cyclin-dependent kinase 2                                                              | CDK2    | Homo sapiens |
| 1018  | cyclin-dependent kinase 3                                                              | CDK3    | Homo sapiens |
| 1019  | cyclin-dependent kinase 4                                                              | CDK4    | Homo sapiens |
| 1020  | cyclin-dependent kinase 5                                                              | CDK5    | Homo sapiens |
| 8851  | cyclin-dependent kinase 5, regulatory subunit 1 (p35)                                  | CDK5R1  | Homo sapiens |
| 8941  | cyclin-dependent kinase 5, regulatory subunit 2 (p39)                                  | CDK5R2  | Homo sapiens |
| 1021  | cyclin-dependent kinase 6                                                              | CDK6    | Homo sapiens |
| 1022  | cyclin-dependent kinase 7                                                              | CDK7    | Homo sapiens |
| 1025  | cyclin-dependent kinase 9                                                              | CDK9    | Homo sapiens |
| 6792  | cyclin-dependent kinase-like 5                                                         | CDKL5   | Homo sapiens |
| 1026  | cyclin-dependent kinase inhibitor 1A (p21, Cip1)                                       | CDKN1A  | Homo sapiens |
| 1027  | cyclin-dependent kinase inhibitor 1B (p27, Kip1)                                       | CDKN1B  | Homo sapiens |
| 1028  | cyclin-dependent kinase inhibitor 1C (p57, Kip2)                                       | CDKN1C  | Homo sapiens |
| 1029  | cyclin-dependent kinase inhibitor 2A (melanoma, p16, inhibits CDK4)                    | CDKN2A  | Homo sapiens |
| 1030  | cyclin-dependent kinase inhibitor 2B (p15, inhibits CDK4)                              | CDKN2B  | Homo sapiens |
| 1031  | cyclin-dependent kinase inhibitor 2C (p18, inhibits CDK4)                              | CDKN2C  | Homo sapiens |
| 1032  | cyclin-dependent kinase inhibitor 2D (p19, inhibits CDK4)                              | CDKN2D  | Homo sapiens |
| 1033  | cyclin-dependent kinase inhibitor 3                                                    | CDKN3   | Homo sapiens |
| 1036  | cysteine dioxygenase, type I                                                           | CDO1    | Homo sapiens |
| 1039  | cerebellar degeneration-related protein 2, 62kDa                                       | CDR2    | Homo sapiens |
| 1040  | CDP-diacylglycerol synthase (phosphatidate cytidyltransferase) 1                       | CDS1    | Homo sapiens |
| 8760  | CDP-diacylglycerol synthase (phosphatidate cytidyltransferase) 2                       | CDS2    | Homo sapiens |
| 1044  | caudal type homeobox 1                                                                 | CDX1    | Homo sapiens |
| 1045  | caudal type homeobox 2                                                                 | CDX2    | Homo sapiens |
| 9425  | chromodomain protein, Y-like                                                           | CDYL    | Homo sapiens |
| 634   | carcinoembryonic antigen-related cell adhesion molecule 1 (biliary glycoprotein)       | CEACAM1 | Homo sapiens |
| 1089  | carcinoembryonic antigen-related cell adhesion molecule 4                              | CEACAM4 | Homo sapiens |
| 1087  | carcinoembryonic antigen-related cell adhesion molecule 7                              | CEACAM7 | Homo sapiens |

|           |                                                                                     |        |              |
|-----------|-------------------------------------------------------------------------------------|--------|--------------|
| 1051      | CCAAT/enhancer binding protein (C/EBP), beta                                        | CEBPB  | Homo sapiens |
| 1054      | CCAAT/enhancer binding protein (C/EBP), gamma                                       | CEBPG  | Homo sapiens |
| 51816     | cat eye syndrome chromosome region, candidate 1                                     | CECR1  | Homo sapiens |
| 9620      | cadherin, EGF LAG seven-pass G-type receptor 1 (flamingo homolog, Drosophila)       | CELSR1 | Homo sapiens |
| 1952      | cadherin, EGF LAG seven-pass G-type receptor 2 (flamingo homolog, Drosophila)       | CELSR2 | Homo sapiens |
| 1062      | centromere protein E, 312kDa                                                        | CENPE  | Homo sapiens |
| 1063      | centromere protein F, 350/400ka (mitosin)                                           | CENPF  | Homo sapiens |
| 9350      | cerberus 1, cysteine knot superfamily, homolog (Xenopus laevis)                     | CER1   | Homo sapiens |
| 64781     | ceramide kinase                                                                     | CERK   | Homo sapiens |
| 8824      | carboxylesterase 2 (intestine, liver)                                               | CES2   | Homo sapiens |
| 1068      | centrin, EF-hand protein, 1                                                         | CETN1  | Homo sapiens |
| 1070      | centrin, EF-hand protein, 3 (CDC31 homolog, yeast)                                  | CETN3  | Homo sapiens |
| 10428     | craniofacial development protein 1                                                  | CFDP1  | Homo sapiens |
| 1072      | cofilin 1 (non-muscle)                                                              | CFL1   | Homo sapiens |
| 8837      | CASP8 and FADD-like apoptosis regulator                                             | CFLAR  | Homo sapiens |
| 1081      | glycoprotein hormones, alpha polypeptide                                            | CGA    | Homo sapiens |
| 10668     | cell growth regulator with ring finger domain 1                                     | CGRRF1 | Homo sapiens |
| 9023      | cholesterol 25-hydroxylase                                                          | CH25H  | Homo sapiens |
| 1101      | chondroadherin                                                                      | CHAD   | Homo sapiens |
| 8208      | chromatin assembly factor 1, subunit B (p60)                                        | CHAF1B | Homo sapiens |
| 1105      | chromodomain helicase DNA binding protein 1                                         | CHD1   | Homo sapiens |
| 9557      | chromodomain helicase DNA binding protein 1-like                                    | CHD1L  | Homo sapiens |
| 1106      | chromodomain helicase DNA binding protein 2                                         | CHD2   | Homo sapiens |
| 1108      | chromodomain helicase DNA binding protein 4                                         | CHD4   | Homo sapiens |
| 26038     | chromodomain helicase DNA binding protein 5                                         | CHD5   | Homo sapiens |
| 80205     | chromodomain helicase DNA binding protein 9                                         | CHD9   | Homo sapiens |
| 1111      | CHK1 checkpoint homolog (S. pombe)                                                  | CHEK1  | Homo sapiens |
| 11200     | protein kinase CHK2-like; CHK2 checkpoint homolog (S. pombe); similar to hCG1983233 | CHEK2  | Homo sapiens |
| 646096    | protein kinase CHK2-like; CHK2 checkpoint homolog (S. pombe); similar to hCG1983233 | CHEK2  | Homo sapiens |
| 100133012 | protein kinase CHK2-like; CHK2 checkpoint homolog (S. pombe); similar to hCG1983233 | CHEK2  | Homo sapiens |
| 1113      | chromogranin A (parathyroid secretory protein 1)                                    | CHGA   | Homo sapiens |
| 1114      | chromogranin B (secretogranin 1)                                                    | CHGB   | Homo sapiens |
| 1116      | chitinase 3-like 1 (cartilage glycoprotein-39)                                      | CHI3L1 | Homo sapiens |
| 1117      | chitinase 3-like 2                                                                  | CHI3L2 | Homo sapiens |
| 10752     | cell adhesion molecule with homology to L1CAM (close homolog of L1)                 | CHL1   | Homo sapiens |
| 1122      | choroideremia-like (Rab escort protein 2)                                           | CHML   | Homo sapiens |
| 1123      | chimerin (chimaerin) 1                                                              | CHN1   | Homo sapiens |
| 56994     | choline phosphotransferase 1                                                        | CHPT1  | Homo sapiens |
| 8646      | chordin                                                                             | CHRD   | Homo sapiens |
| 1136      | cholinergic receptor, nicotinic, alpha 3                                            | CHRNA3 | Homo sapiens |
| 8534      | carbohydrate (keratan sulfate Gal-6) sulfotransferase 1                             | CHST1  | Homo sapiens |

|        |                                                                                           |         |              |
|--------|-------------------------------------------------------------------------------------------|---------|--------------|
| 9486   | carbohydrate sulfotransferase 10                                                          | CHST10  | Homo sapiens |
| 50515  | carbohydrate (chondroitin 4) sulfotransferase 11                                          | CHST11  | Homo sapiens |
| 9435   | carbohydrate (N-acetylglucosamine-6-O) sulfotransferase 2                                 | CHST2   | Homo sapiens |
| 728599 | cytokine induced apoptosis inhibitor 1; cytokine induced apoptosis inhibitor 1 pseudogene | CIAPIN1 | Homo sapiens |
| 57019  | cytokine induced apoptosis inhibitor 1; cytokine induced apoptosis inhibitor 1 pseudogene | CIAPIN1 | Homo sapiens |
| 10518  | calcium and integrin binding family member 2                                              | CIB2    | Homo sapiens |
| 1149   | cell death-inducing DFFA-like effector a                                                  | CIDEA   | Homo sapiens |
| 63924  | cell death-inducing DFFA-like effector c                                                  | CIDEC   | Homo sapiens |
| 8483   | cartilage intermediate layer protein, nucleotide pyrophosphohydrolase                     | CILP    | Homo sapiens |
| 1153   | cold inducible RNA binding protein                                                        | CIRBP   | Homo sapiens |
| 11113  | citron (rho-interacting, serine/threonine kinase 21)                                      | CIT     | Homo sapiens |
| 4435   | Cbp/p300-interacting transactivator, with Glu/Asp-rich carboxy-terminal domain, 1         | CITED1  | Homo sapiens |
| 10370  | Cbp/p300-interacting transactivator, with Glu/Asp-rich carboxy-terminal domain, 2         | CITED2  | Homo sapiens |
| 25792  | CDKN1A interacting zinc finger protein 1                                                  | CIZ1    | Homo sapiens |
| 51192  | chemokine-like factor                                                                     | CKLF    | Homo sapiens |
| 1160   | creatine kinase, mitochondrial 2 (sarcomeric)                                             | CKMT2   | Homo sapiens |
| 23332  | cytoplasmic linker associated protein 1                                                   | CLASP1  | Homo sapiens |
| 23122  | cytoplasmic linker associated protein 2                                                   | CLASP2  | Homo sapiens |
| 9635   | chloride channel accessory 2                                                              | CLCA2   | Homo sapiens |
| 1181   | chloride channel 2                                                                        | CLCN2   | Homo sapiens |
| 1182   | chloride channel 3                                                                        | CLCN3   | Homo sapiens |
| 1183   | chloride channel 4                                                                        | CLCN4   | Homo sapiens |
| 1184   | chloride channel 5                                                                        | CLCN5   | Homo sapiens |
| 1185   | chloride channel 6                                                                        | CLCN6   | Homo sapiens |
| 1186   | chloride channel 7                                                                        | CLCN7   | Homo sapiens |
| 9076   | claudin 1                                                                                 | CLDN1   | Homo sapiens |
| 9071   | claudin 10                                                                                | CLDN10  | Homo sapiens |
| 9069   | claudin 12                                                                                | CLDN12  | Homo sapiens |
| 51208  | claudin 18                                                                                | CLDN18  | Homo sapiens |
| 9075   | claudin 2                                                                                 | CLDN2   | Homo sapiens |
| 1364   | claudin 4                                                                                 | CLDN4   | Homo sapiens |
| 7122   | claudin 5                                                                                 | CLDN5   | Homo sapiens |
| 1366   | claudin 7                                                                                 | CLDN7   | Homo sapiens |
| 9080   | claudin 9                                                                                 | CLDN9   | Homo sapiens |
| 1192   | chloride intracellular channel 1                                                          | CLIC1   | Homo sapiens |
| 1193   | chloride intracellular channel 2                                                          | CLIC2   | Homo sapiens |
| 25932  | chloride intracellular channel 4                                                          | CLIC4   | Homo sapiens |
| 1196   | CDC-like kinase 2                                                                         | CLK2    | Homo sapiens |
| 1198   | CDC-like kinase 3                                                                         | CLK3    | Homo sapiens |
| 1203   | ceroid-lipofuscinosis, neuronal 5                                                         | CLN5    | Homo sapiens |
| 1207   | chloride channel, nucleotide-sensitive, 1A                                                | CLNS1A  | Homo sapiens |
| 9575   | clock homolog (mouse)                                                                     | CLOCK   | Homo sapiens |

|       |                                                                                   |         |              |
|-------|-----------------------------------------------------------------------------------|---------|--------------|
| 8192  | ClpP caseinolytic peptidase, ATP-dependent, proteolytic subunit homolog (E. coli) | CLPP    | Homo sapiens |
| 1208  | colipase, pancreatic                                                              | CLPS    | Homo sapiens |
| 10845 | ClpX caseinolytic peptidase X homolog (E. coli)                                   | CLPX    | Homo sapiens |
| 22883 | calsyntenin 1                                                                     | CLSTN1  | Homo sapiens |
| 1211  | clathrin, light chain (Lca)                                                       | CLTA    | Homo sapiens |
| 1212  | clathrin, light chain (Lcb)                                                       | CLTB    | Homo sapiens |
| 1191  | clusterin                                                                         | CLU     | Homo sapiens |
| 55907 | cytidine monophosphate N-acetylneuraminic acid synthetase                         | CMAS    | Homo sapiens |
| 1258  | cyclic nucleotide gated channel beta 1                                            | CNGB1   | Homo sapiens |
| 10175 | cornichon homolog (Drosophila)                                                    | CNIH    | Homo sapiens |
| 10256 | connector enhancer of kinase suppressor of Ras 1                                  | CNKS1   | Homo sapiens |
| 1264  | calponin 1, basic, smooth muscle                                                  | CNN1    | Homo sapiens |
| 1266  | calponin 3, acidic                                                                | CNN3    | Homo sapiens |
| 54805 | cyclin M2                                                                         | CNNM2   | Homo sapiens |
| 4848  | CCR4-NOT transcription complex, subunit 2                                         | CNOT2   | Homo sapiens |
| 4849  | CCR4-NOT transcription complex, subunit 3                                         | CNOT3   | Homo sapiens |
| 29883 | CCR4-NOT transcription complex, subunit 7                                         | CNOT7   | Homo sapiens |
| 9337  | CCR4-NOT transcription complex, subunit 8                                         | CNOT8   | Homo sapiens |
| 1267  | 2',3'-cyclic nucleotide 3' phosphodiesterase                                      | CNP     | Homo sapiens |
| 1271  | ciliary neurotrophic factor receptor                                              | CNTFR   | Homo sapiens |
| 1272  | contactin 1                                                                       | CNTN1   | Homo sapiens |
| 6900  | contactin 2 (axonal)                                                              | CNTN2   | Homo sapiens |
| 27255 | contactin 6                                                                       | CNTN6   | Homo sapiens |
| 80347 | Coenzyme A synthase                                                               | COASY   | Homo sapiens |
| 23242 | cordon-bleu homolog (mouse)                                                       | COBL    | Homo sapiens |
| 22837 | COBL-like 1                                                                       | COBLL1  | Homo sapiens |
| 1690  | coagulation factor C homolog, cochl (Limulus polyphemus)                          | COCH    | Homo sapiens |
| 22796 | component of oligomeric golgi complex 2                                           | COG2    | Homo sapiens |
| 10466 | component of oligomeric golgi complex 5                                           | COG5    | Homo sapiens |
| 1300  | collagen, type X, alpha 1                                                         | COL10A1 | Homo sapiens |
| 1302  | collagen, type XI, alpha 2                                                        | COL11A2 | Homo sapiens |
| 1303  | collagen, type XII, alpha 1                                                       | COL12A1 | Homo sapiens |
| 7373  | collagen, type XIV, alpha 1                                                       | COL14A1 | Homo sapiens |
| 1308  | collagen, type XVII, alpha 1                                                      | COL17A1 | Homo sapiens |
| 80781 | collagen, type XVIII, alpha 1                                                     | COL18A1 | Homo sapiens |
| 1278  | collagen, type I, alpha 2                                                         | COL1A2  | Homo sapiens |
| 81578 | collagen, type XXI, alpha 1                                                       | COL21A1 | Homo sapiens |
| 1281  | collagen, type III, alpha 1                                                       | COL3A1  | Homo sapiens |
| 1282  | collagen, type IV, alpha 1                                                        | COL4A1  | Homo sapiens |
| 1287  | collagen, type IV, alpha 5                                                        | COL4A5  | Homo sapiens |
| 1288  | collagen, type IV, alpha 6                                                        | COL4A6  | Homo sapiens |
| 1289  | collagen, type V, alpha 1                                                         | COL5A1  | Homo sapiens |
| 1290  | collagen, type V, alpha 2                                                         | COL5A2  | Homo sapiens |
| 50509 | collagen, type V, alpha 3                                                         | COL5A3  | Homo sapiens |
| 1291  | collagen, type VI, alpha 1                                                        | COL6A1  | Homo sapiens |

|        |                                                                      |         |              |
|--------|----------------------------------------------------------------------|---------|--------------|
| 1292   | collagen, type VI, alpha 2                                           | COL6A2  | Homo sapiens |
| 1293   | collagen, type VI, alpha 3                                           | COL6A3  | Homo sapiens |
| 1294   | collagen, type VII, alpha 1                                          | COL7A1  | Homo sapiens |
| 1295   | collagen, type VIII, alpha 1                                         | COL8A1  | Homo sapiens |
| 1297   | collagen, type IX, alpha 1                                           | COL9A1  | Homo sapiens |
| 1298   | collagen, type IX, alpha 2                                           | COL9A2  | Homo sapiens |
| 1299   | collagen, type IX, alpha 3                                           | COL9A3  | Homo sapiens |
| 10584  | collectin sub-family member 10 (C-type lectin)                       | COLEC10 | Homo sapiens |
| 150684 | copper metabolism (Murr1) domain containing 1                        | COMMD1  | Homo sapiens |
| 1311   | cartilage oligomeric matrix protein                                  | COMP    | Homo sapiens |
| 1314   | coatamer protein complex, subunit alpha                              | COPA    | Homo sapiens |
| 9276   | coatamer protein complex, subunit beta 2 (beta prime)                | COPB2   | Homo sapiens |
| 11316  | coatamer protein complex, subunit epsilon                            | COPE    | Homo sapiens |
| 8533   | COP9 constitutive photomorphogenic homolog subunit 3 (Arabidopsis)   | COPS3   | Homo sapiens |
| 10987  | COP9 constitutive photomorphogenic homolog subunit 5 (Arabidopsis)   | COPS5   | Homo sapiens |
| 10980  | COP9 constitutive photomorphogenic homolog subunit 6 (Arabidopsis)   | COPS6   | Homo sapiens |
| 50813  | COP9 constitutive photomorphogenic homolog subunit 7A (Arabidopsis)  | COPS7A  | Homo sapiens |
| 10920  | COP9 constitutive photomorphogenic homolog subunit 8 (Arabidopsis)   | COPS8   | Homo sapiens |
| 10229  | coenzyme Q7 homolog, ubiquinone (yeast)                              | COQ7    | Homo sapiens |
| 10699  | corin, serine peptidase                                              | CORIN   | Homo sapiens |
| 11151  | coronin, actin binding protein, 1A                                   | CORO1A  | Homo sapiens |
| 7464   | coronin, actin binding protein, 2A                                   | CORO2A  | Homo sapiens |
| 378708 | cortistatin; apoptosis-inducing, TAF9-like domain 1                  | CORT    | Homo sapiens |
| 1325   | cortistatin; apoptosis-inducing, TAF9-like domain 1                  | CORT    | Homo sapiens |
| 1353   | COX11 homolog, cytochrome c oxidase assembly protein (yeast)         | COX11   | Homo sapiens |
| 10063  | COX17 cytochrome c oxidase assembly homolog ( <i>S. cerevisiae</i> ) | COX17   | Homo sapiens |
| 84701  | cytochrome c oxidase subunit IV isoform 2 (lung)                     | COX4I2  | Homo sapiens |
| 9377   | cytochrome c oxidase subunit Va                                      | COX5A   | Homo sapiens |
| 1329   | cytochrome c oxidase subunit Vb                                      | COX5B   | Homo sapiens |
| 1337   | cytochrome c oxidase subunit VIa polypeptide 1                       | COX6A1  | Homo sapiens |
| 1339   | cytochrome c oxidase subunit VIa polypeptide 2                       | COX6A2  | Homo sapiens |
| 1340   | cytochrome c oxidase subunit Vib polypeptide 1 (ubiquitous)          | COX6B1  | Homo sapiens |
| 1345   | cytochrome c oxidase subunit VIc                                     | COX6C   | Homo sapiens |
| 1346   | cytochrome c oxidase subunit VIIa polypeptide 1 (muscle)             | COX7A1  | Homo sapiens |
| 1347   | cytochrome c oxidase subunit VIIa polypeptide 2 (liver)              | COX7A2  | Homo sapiens |
| 9167   | cytochrome c oxidase subunit VIIa polypeptide 2 like                 | COX7A2L | Homo sapiens |
| 1350   | cytochrome c oxidase subunit VIIC                                    | COX7C   | Homo sapiens |
| 1356   | ceruloplasmin (ferroxidase)                                          | CP      | Homo sapiens |
| 1359   | carboxypeptidase A3 (mast cell)                                      | CPA3    | Homo sapiens |
| 1360   | carboxypeptidase B1 (tissue)                                         | CPB1    | Homo sapiens |
| 1361   | carboxypeptidase B2 (plasma)                                         | CPB2    | Homo sapiens |
| 1362   | carboxypeptidase D                                                   | CPD     | Homo sapiens |

|        |                                                                       |        |              |
|--------|-----------------------------------------------------------------------|--------|--------------|
| 1363   | carboxypeptidase E                                                    | CPE    | Homo sapiens |
| 1368   | carboxypeptidase M                                                    | CPM    | Homo sapiens |
| 1369   | carboxypeptidase N, polypeptide 1                                     | CPN1   | Homo sapiens |
| 8895   | copine III                                                            | CPNE3  | Homo sapiens |
| 1371   | coproporphyrinogen oxidase                                            | CPOX   | Homo sapiens |
| 1373   | carbamoyl-phosphate synthetase 1, mitochondrial                       | CPS1   | Homo sapiens |
| 29894  | cleavage and polyadenylation specific factor 1, 160kDa                | CPSF1  | Homo sapiens |
| 10898  | cleavage and polyadenylation specific factor 4, 30kDa                 | CPSF4  | Homo sapiens |
| 11052  | cleavage and polyadenylation specific factor 6, 68kDa                 | CPSF6  | Homo sapiens |
| 1374   | carnitine palmitoyltransferase 1A (liver)                             | CPT1A  | Homo sapiens |
| 1376   | carnitine palmitoyltransferase 2                                      | CPT2   | Homo sapiens |
| 54504  | carboxypeptidase, vitellogenic-like                                   | CPVL   | Homo sapiens |
| 8532   | carboxypeptidase Z                                                    | CPZ    | Homo sapiens |
| 1380   | complement component (3d/Epstein Barr virus) receptor 2               | CR2    | Homo sapiens |
| 1382   | cellular retinoic acid binding protein 2                              | CRABP2 | Homo sapiens |
| 8738   | CASP2 and RIPK1 domain containing adaptor with death domain           | CRADD  | Homo sapiens |
| 1384   | carnitine acetyltransferase                                           | CRAT   | Homo sapiens |
| 1385   | cAMP responsive element binding protein 1                             | CREB1  | Homo sapiens |
| 9586   | cAMP responsive element binding protein 5                             | CREB5  | Homo sapiens |
| 1387   | CREB binding protein                                                  | CREBBP | Homo sapiens |
| 1389   | cAMP responsive element binding protein-like 2                        | CREBL2 | Homo sapiens |
| 78987  | cysteine-rich with EGF-like domains 1                                 | CRELD1 | Homo sapiens |
| 1390   | cAMP responsive element modulator                                     | CREM   | Homo sapiens |
| 1392   | corticotropin releasing hormone                                       | CRH    | Homo sapiens |
| 1393   | corticotropin releasing hormone binding protein                       | CRHBP  | Homo sapiens |
| 1397   | cysteine-rich protein 2                                               | CRIP2  | Homo sapiens |
| 167    | cysteine-rich secretory protein 1                                     | CRISP1 | Homo sapiens |
| 10321  | cysteine-rich secretory protein 3                                     | CRISP3 | Homo sapiens |
| 9244   | cytokine receptor-like factor 1                                       | CRLF1  | Homo sapiens |
| 51379  | cytokine receptor-like factor 3                                       | CRLF3  | Homo sapiens |
| 1400   | collapsin response mediator protein 1                                 | CRMP1  | Homo sapiens |
| 1407   | cryptochrome 1 (photolyase-like)                                      | CRY1   | Homo sapiens |
| 1408   | cryptochrome 2 (photolyase-like)                                      | CRY2   | Homo sapiens |
| 1409   | crystallin, alpha A                                                   | CRYAA  | Homo sapiens |
| 1410   | crystallin, alpha B                                                   | CRYAB  | Homo sapiens |
| 1411   | crystallin, beta A1                                                   | CRYBA1 | Homo sapiens |
| 1414   | crystallin, beta B1                                                   | CRYBB1 | Homo sapiens |
| 1418   | crystallin, gamma A                                                   | CRYGA  | Homo sapiens |
| 1420   | crystallin, gamma C                                                   | CRYGC  | Homo sapiens |
| 51084  | crystallin, lambda 1                                                  | CRYL1  | Homo sapiens |
| 1428   | crystallin, mu                                                        | CRYM   | Homo sapiens |
| 1429   | crystallin, zeta (quinone reductase)                                  | CRYZ   | Homo sapiens |
| 1431   | citrate synthase                                                      | CS     | Homo sapiens |
| 8531   | cold shock domain protein A; cold shock domain protein A pseudogene 1 | CSDA   | Homo sapiens |
| 440359 | cold shock domain protein A; cold shock domain protein A              | CSDA   | Homo sapiens |

|           |                                                                                                        |         |              |
|-----------|--------------------------------------------------------------------------------------------------------|---------|--------------|
|           | pseudogene 1                                                                                           |         |              |
| 1434      | CSE1 chromosome segregation 1-like (yeast)                                                             | CSE1L   | Homo sapiens |
| 1436      | colony stimulating factor 1 receptor                                                                   | CSF1R   | Homo sapiens |
| 1437      | colony stimulating factor 2 (granulocyte-macrophage)                                                   | CSF2    | Homo sapiens |
| 1440      | colony stimulating factor 3 (granulocyte)                                                              | CSF3    | Homo sapiens |
| 1441      | colony stimulating factor 3 receptor (granulocyte)                                                     | CSF3R   | Homo sapiens |
| 1452      | casein kinase 1, alpha 1                                                                               | CSNK1A1 | Homo sapiens |
| 1453      | casein kinase 1, delta                                                                                 | CSNK1D  | Homo sapiens |
| 1454      | casein kinase 1, epsilon                                                                               | CSNK1E  | Homo sapiens |
| 1455      | casein kinase 1, gamma 2                                                                               | CSNK1G2 | Homo sapiens |
| 1457      | casein kinase 2, alpha 1 polypeptide pseudogene; casein kinase 2, alpha 1 polypeptide                  | CSNK2A1 | Homo sapiens |
| 283106    | casein kinase 2, alpha 1 polypeptide pseudogene; casein kinase 2, alpha 1 polypeptide                  | CSNK2A1 | Homo sapiens |
| 1459      | casein kinase 2, alpha prime polypeptide                                                               | CSNK2A2 | Homo sapiens |
| 1460      | lymphocyte antigen 6 complex, locus G5B; casein kinase 2, beta polypeptide                             | CSNK2B  | Homo sapiens |
| 58496     | lymphocyte antigen 6 complex, locus G5B; casein kinase 2, beta polypeptide                             | CSNK2B  | Homo sapiens |
| 1464      | chondroitin sulfate proteoglycan 4                                                                     | CSPG4   | Homo sapiens |
| 10675     | chondroitin sulfate proteoglycan 5 (neuroglycan C)                                                     | CSPG5   | Homo sapiens |
| 1466      | cysteine and glycine-rich protein 2                                                                    | CSRP2   | Homo sapiens |
| 8048      | cysteine and glycine-rich protein 3 (cardiac LIM protein)                                              | CSRP3   | Homo sapiens |
| 1471      | cystatin C                                                                                             | CST3    | Homo sapiens |
| 1474      | cystatin E/M                                                                                           | CST6    | Homo sapiens |
| 8530      | cystatin F (leukocystatin)                                                                             | CST7    | Homo sapiens |
| 1475      | cystatin A (stefin A)                                                                                  | CSTA    | Homo sapiens |
| 1477      | cleavage stimulation factor, 3' pre-RNA, subunit 1, 50kDa                                              | CSTF1   | Homo sapiens |
| 1478      | cleavage stimulation factor, 3' pre-RNA, subunit 2, 64kDa                                              | CSTF2   | Homo sapiens |
| 1479      | cleavage stimulation factor, 3' pre-RNA, subunit 3, 77kDa                                              | CSTF3   | Homo sapiens |
| 4253      | CTAGE family, member 5 pseudogene; CTAGE family member; CTAGE family, member 4; CTAGE family, member 5 | CTAGE5  | Homo sapiens |
| 220429    | CTAGE family, member 5 pseudogene; CTAGE family member; CTAGE family, member 4; CTAGE family, member 5 | CTAGE5  | Homo sapiens |
| 643854    | CTAGE family, member 5 pseudogene; CTAGE family member; CTAGE family, member 4; CTAGE family, member 5 | CTAGE5  | Homo sapiens |
| 100128553 | CTAGE family, member 5 pseudogene; CTAGE family member; CTAGE family, member 4; CTAGE family, member 5 | CTAGE5  | Homo sapiens |
| 1487      | C-terminal binding protein 1                                                                           | CTBP1   | Homo sapiens |
| 1488      | C-terminal binding protein 2                                                                           | CTBP2   | Homo sapiens |
| 1486      | chitobiase, di-N-acetyl-                                                                               | CTBS    | Homo sapiens |
| 9150      | CTD (carboxy-terminal domain, RNA polymerase II, polypeptide A) phosphatase, subunit 1                 | CTDP1   | Homo sapiens |
| 1489      | cardiotrophin 1                                                                                        | CTF1    | Homo sapiens |
| 1490      | connective tissue growth factor                                                                        | CTGF    | Homo sapiens |
| 1491      | cystathionase (cystathionine gamma-lyase)                                                              | CTH     | Homo sapiens |
| 115908    | collagen triple helix repeat containing 1                                                              | CTHRC1  | Homo sapiens |
| 1496      | catenin (cadherin-associated protein), alpha 2                                                         | CTNNA2  | Homo sapiens |



|        |                                                                                                |          |              |
|--------|------------------------------------------------------------------------------------------------|----------|--------------|
| 8727   | catenin (cadherin-associated protein), alpha-like 1                                            | CTNNAL1  | Homo sapiens |
| 1499   | catenin (cadherin-associated protein), beta 1, 88kDa                                           | CTNNB1   | Homo sapiens |
| 56998  | catenin, beta interacting protein 1                                                            | CTNNBIP1 | Homo sapiens |
| 56259  | catenin, beta like 1                                                                           | CTNNBL1  | Homo sapiens |
| 1500   | catenin (cadherin-associated protein), delta 1                                                 | CTNND1   | Homo sapiens |
| 1501   | catenin (cadherin-associated protein), delta 2 (neural plakophilin-related arm-repeat protein) | CTNND2   | Homo sapiens |
| 1497   | cystinosis, nephropathic                                                                       | CTNS     | Homo sapiens |
| 1503   | CTP synthase                                                                                   | CTPS     | Homo sapiens |
| 1508   | cathepsin B                                                                                    | CTSB     | Homo sapiens |
| 1075   | cathepsin C                                                                                    | CTSC     | Homo sapiens |
| 8722   | cathepsin F                                                                                    | CTSF     | Homo sapiens |
| 1511   | cathepsin G                                                                                    | CTSG     | Homo sapiens |
| 1512   | cathepsin H                                                                                    | CTSH     | Homo sapiens |
| 1513   | cathepsin K                                                                                    | CTSK     | Homo sapiens |
| 1515   | cathepsin L2                                                                                   | CTSL2    | Homo sapiens |
| 1519   | cathepsin O                                                                                    | CTSO     | Homo sapiens |
| 1520   | cathepsin S                                                                                    | CTSS     | Homo sapiens |
| 1522   | cathepsin Z                                                                                    | CTSZ     | Homo sapiens |
| 2017   | cortactin                                                                                      | CTTN     | Homo sapiens |
| 8029   | cubilin (intrinsic factor-cobalamin receptor)                                                  | CUBN     | Homo sapiens |
| 8454   | cullin 1                                                                                       | CUL1     | Homo sapiens |
| 8453   | cullin 2                                                                                       | CUL2     | Homo sapiens |
| 8452   | cullin 3                                                                                       | CUL3     | Homo sapiens |
| 8451   | cullin 4A                                                                                      | CUL4A    | Homo sapiens |
| 8450   | cullin 4B                                                                                      | CUL4B    | Homo sapiens |
| 8065   | cullin 5                                                                                       | CUL5     | Homo sapiens |
| 9820   | cullin 7                                                                                       | CUL7     | Homo sapiens |
| 6376   | chemokine (C-X3-C motif) ligand 1                                                              | CX3CL1   | Homo sapiens |
| 1524   | chemokine (C-X3-C motif) receptor 1                                                            | CX3CR1   | Homo sapiens |
| 1525   | coxsackie virus and adenovirus receptor pseudogene 2; coxsackie virus and adenovirus receptor  | CXADR    | Homo sapiens |
| 646243 | coxsackie virus and adenovirus receptor pseudogene 2; coxsackie virus and adenovirus receptor  | CXADR    | Homo sapiens |
| 3627   | chemokine (C-X-C motif) ligand 10                                                              | CXCL10   | Homo sapiens |
| 6373   | chemokine (C-X-C motif) ligand 11                                                              | CXCL11   | Homo sapiens |
| 10563  | chemokine (C-X-C motif) ligand 13                                                              | CXCL13   | Homo sapiens |
| 9547   | chemokine (C-X-C motif) ligand 14                                                              | CXCL14   | Homo sapiens |
| 58191  | chemokine (C-X-C motif) ligand 16                                                              | CXCL16   | Homo sapiens |
| 2920   | chemokine (C-X-C motif) ligand 2                                                               | CXCL2    | Homo sapiens |
| 2921   | chemokine (C-X-C motif) ligand 3                                                               | CXCL3    | Homo sapiens |
| 6372   | chemokine (C-X-C motif) ligand 6 (granulocyte chemotactic protein 2)                           | CXCL6    | Homo sapiens |
| 4283   | chemokine (C-X-C motif) ligand 9                                                               | CXCL9    | Homo sapiens |
| 7852   | chemokine (C-X-C motif) receptor 4                                                             | CXCR4    | Homo sapiens |
| 10663  | chemokine (C-X-C motif) receptor 6                                                             | CXCR6    | Homo sapiens |
| 1534   | cytochrome b-561                                                                               | CYB561   | Homo sapiens |
| 1535   | cytochrome b-245, alpha polypeptide                                                            | CYBA     | Homo sapiens |

|       |                                                                                       |          |              |
|-------|---------------------------------------------------------------------------------------|----------|--------------|
| 1536  | cytochrome b-245, beta polypeptide                                                    | CYBB     | Homo sapiens |
| 1537  | cytochrome c-1                                                                        | CYC1     | Homo sapiens |
| 54205 | cytochrome c, somatic                                                                 | CYCS     | Homo sapiens |
| 50626 | cysteine/histidine-rich 1                                                             | CYHR1    | Homo sapiens |
| 84663 | chromosome Y open reading frame 15B                                                   | CYorf15B | Homo sapiens |
| 1583  | cytochrome P450, family 11, subfamily A, polypeptide 1                                | CYP11A1  | Homo sapiens |
| 1584  | cytochrome P450, family 11, subfamily B, polypeptide 1                                | CYP11B1  | Homo sapiens |
| 1585  | cytochrome P450, family 11, subfamily B, polypeptide 2                                | CYP11B2  | Homo sapiens |
| 1586  | cytochrome P450, family 17, subfamily A, polypeptide 1                                | CYP17A1  | Homo sapiens |
| 1588  | cytochrome P450, family 19, subfamily A, polypeptide 1                                | CYP19A1  | Homo sapiens |
| 1591  | cytochrome P450, family 24, subfamily A, polypeptide 1                                | CYP24A1  | Homo sapiens |
| 1592  | cytochrome P450, family 26, subfamily A, polypeptide 1                                | CYP26A1  | Homo sapiens |
| 56603 | cytochrome P450, family 26, subfamily B, polypeptide 1                                | CYP26B1  | Homo sapiens |
| 1593  | cytochrome P450, family 27, subfamily A, polypeptide 1                                | CYP27A1  | Homo sapiens |
| 1594  | cytochrome P450, family 27, subfamily B, polypeptide 1                                | CYP27B1  | Homo sapiens |
| 1555  | cytochrome P450, family 2, subfamily B, polypeptide 6                                 | CYP2B6   | Homo sapiens |
| 1558  | cytochrome P450, family 2, subfamily C, polypeptide 8                                 | CYP2C8   | Homo sapiens |
| 1571  | cytochrome P450, family 2, subfamily E, polypeptide 1                                 | CYP2E1   | Homo sapiens |
| 1573  | cytochrome P450, family 2, subfamily J, polypeptide 2                                 | CYP2J2   | Homo sapiens |
| 51302 | cytochrome P450, family 39, subfamily A, polypeptide 1                                | CYP39A1  | Homo sapiens |
| 1576  | cytochrome P450, family 3, subfamily A, polypeptide 4                                 | CYP3A4   | Homo sapiens |
| 1577  | cytochrome P450, family 3, subfamily A, polypeptide 5                                 | CYP3A5   | Homo sapiens |
| 1551  | cytochrome P450, family 3, subfamily A, polypeptide 7                                 | CYP3A7   | Homo sapiens |
| 10858 | cytochrome P450, family 46, subfamily A, polypeptide 1                                | CYP46A1  | Homo sapiens |
| 1579  | cytochrome P450, family 4, subfamily A, polypeptide 11                                | CYP4A11  | Homo sapiens |
| 1580  | cytochrome P450, family 4, subfamily B, polypeptide 1                                 | CYP4B1   | Homo sapiens |
| 57834 | cytochrome P450, family 4, subfamily F, polypeptide 11                                | CYP4F11  | Homo sapiens |
| 8529  | cytochrome P450, family 4, subfamily F, polypeptide 2                                 | CYP4F2   | Homo sapiens |
| 11283 | cytochrome P450, family 4, subfamily F, polypeptide 8                                 | CYP4F8   | Homo sapiens |
| 1595  | cytochrome P450, family 51, subfamily A, polypeptide 1                                | CYP51A1  | Homo sapiens |
| 9420  | cytochrome P450, family 7, subfamily B, polypeptide 1                                 | CYP7B1   | Homo sapiens |
| 3491  | cysteine-rich, angiogenic inducer, 61                                                 | CYR61    | Homo sapiens |
| 1601  | disabled homolog 2, mitogen-responsive phosphoprotein (Drosophila)                    | DAB2     | Homo sapiens |
| 1605  | dystroglycan 1 (dystrophin-associated glycoprotein 1)                                 | DAG1     | Homo sapiens |
| 1611  | death-associated protein                                                              | DAP      | Homo sapiens |
| 7818  | death associated protein 3                                                            | DAP3     | Homo sapiens |
| 1612  | death-associated protein kinase 1                                                     | DAPK1    | Homo sapiens |
| 23604 | death-associated protein kinase 2                                                     | DAPK2    | Homo sapiens |
| 1613  | death-associated protein kinase 3                                                     | DAPK3    | Homo sapiens |
| 1615  | aspartyl-tRNA synthetase                                                              | DARS     | Homo sapiens |
| 1616  | death-domain associated protein                                                       | DAXX     | Homo sapiens |
| 1618  | deleted in azoospermia-like                                                           | DAZL     | Homo sapiens |
| 1620  | deleted in bladder cancer 1                                                           | DBC1     | Homo sapiens |
| 1622  | diazepam binding inhibitor (GABA receptor modulator, acyl-Coenzyme A binding protein) | DBI      | Homo sapiens |

|        |                                                                                                     |        |              |
|--------|-----------------------------------------------------------------------------------------------------|--------|--------------|
| 1629   | dihydrolipoamide branched chain transacylase E2                                                     | DBT    | Homo sapiens |
| 131566 | discoidin, CUB and LCCL domain containing 2                                                         | DCBLD2 | Homo sapiens |
| 1630   | deleted in colorectal carcinoma                                                                     | DCC    | Homo sapiens |
| 8642   | dachsous 1 (Drosophila)                                                                             | DCHS1  | Homo sapiens |
| 1632   | dodecenoyl-Coenzyme A delta isomerase (3,2 trans-enoyl-Coenzyme A isomerase)                        | DCI    | Homo sapiens |
| 1633   | deoxycytidine kinase                                                                                | DCK    | Homo sapiens |
| 1638   | dopachrome tautomerase (dopachrome delta-isomerase, tyrosine-related protein 2)                     | DCT    | Homo sapiens |
| 1635   | dCMP deaminase                                                                                      | DCTD   | Homo sapiens |
| 10540  | dynactin 2 (p50)                                                                                    | DCTN2  | Homo sapiens |
| 10671  | dynactin 6                                                                                          | DCTN6  | Homo sapiens |
| 1641   | doublecortin                                                                                        | DCX    | Homo sapiens |
| 51181  | dicarbonyl/L-xylulose reductase                                                                     | DCXR   | Homo sapiens |
| 23576  | dimethylarginine dimethylaminohydrolase 1                                                           | DDAH1  | Homo sapiens |
| 23564  | dimethylarginine dimethylaminohydrolase 2                                                           | DDAH2  | Homo sapiens |
| 1643   | damage-specific DNA binding protein 2, 48kDa                                                        | DDB2   | Homo sapiens |
| 1644   | dopa decarboxylase (aromatic L-amino acid decarboxylase)                                            | DDC    | Homo sapiens |
| 8528   | D-aspartate oxidase                                                                                 | DDO    | Homo sapiens |
| 780    | discoidin domain receptor tyrosine kinase 1                                                         | DDR1   | Homo sapiens |
| 4921   | discoidin domain receptor tyrosine kinase 2                                                         | DDR2   | Homo sapiens |
| 1652   | D-dopachrome tautomerase                                                                            | DDT    | Homo sapiens |
| 1653   | DEAD (Asp-Glu-Ala-Asp) box polypeptide 1                                                            | DDX1   | Homo sapiens |
| 1663   | DEAD/H (Asp-Glu-Ala-Asp/His) box polypeptide 11 (CHL1-like helicase homolog, <i>S. cerevisiae</i> ) | DDX11  | Homo sapiens |
| 10521  | DEAD (Asp-Glu-Ala-Asp) box polypeptide 17                                                           | DDX17  | Homo sapiens |
| 8886   | DEAD (Asp-Glu-Ala-Asp) box polypeptide 18                                                           | DDX18  | Homo sapiens |
| 9188   | DEAD (Asp-Glu-Ala-Asp) box polypeptide 21                                                           | DDX21  | Homo sapiens |
| 9416   | DEAD (Asp-Glu-Ala-Asp) box polypeptide 23                                                           | DDX23  | Homo sapiens |
| 55794  | DEAD (Asp-Glu-Ala-Asp) box polypeptide 28                                                           | DDX28  | Homo sapiens |
| 10212  | DEAD (Asp-Glu-Ala-Asp) box polypeptide 39                                                           | DDX39  | Homo sapiens |
| 1654   | DEAD (Asp-Glu-Ala-Asp) box polypeptide 3, X-linked                                                  | DDX3X  | Homo sapiens |
| 51428  | DEAD (Asp-Glu-Ala-Asp) box polypeptide 41                                                           | DDX41  | Homo sapiens |
| 54555  | DEAD (Asp-Glu-Ala-Asp) box polypeptide 49                                                           | DDX49  | Homo sapiens |
| 1655   | DEAD (Asp-Glu-Ala-Asp) box polypeptide 5                                                            | DDX5   | Homo sapiens |
| 317781 | DEAD (Asp-Glu-Ala-Asp) box polypeptide 51                                                           | DDX51  | Homo sapiens |
| 11056  | DEAD (Asp-Glu-Ala-Asp) box polypeptide 52                                                           | DDX52  | Homo sapiens |
| 10522  | deformed epidermal autoregulatory factor 1 (Drosophila)                                             | DEAF1  | Homo sapiens |
| 1666   | 2,4-dienoyl CoA reductase 1, mitochondrial                                                          | DECR1  | Homo sapiens |
| 9191   | death effector domain containing                                                                    | DEDD   | Homo sapiens |
| 1669   | defensin, alpha 4, corticostatin                                                                    | DEFA4  | Homo sapiens |
| 1672   | defensin, beta 1                                                                                    | DEFB1  | Homo sapiens |
| 7913   | DEK oncogene                                                                                        | DEK    | Homo sapiens |
| 1676   | DNA fragmentation factor, 45kDa, alpha polypeptide                                                  | DFFA   | Homo sapiens |
| 1687   | deafness, autosomal dominant 5                                                                      | DFNA5  | Homo sapiens |
| 8694   | diacylglycerol O-acyltransferase homolog 1 (mouse)                                                  | DGAT1  | Homo sapiens |
| 8220   | DiGeorge syndrome critical region gene 14                                                           | DGCR14 | Homo sapiens |

|       |                                                                 |         |              |
|-------|-----------------------------------------------------------------|---------|--------------|
| 8527  | diacylglycerol kinase, delta 130kDa                             | DGKD    | Homo sapiens |
| 8525  | diacylglycerol kinase, zeta 104kDa                              | DGKZ    | Homo sapiens |
| 1716  | deoxyguanosine kinase                                           | DGUOK   | Homo sapiens |
| 1718  | 24-dehydrocholesterol reductase                                 | DHCR24  | Homo sapiens |
| 1717  | 7-dehydrocholesterol reductase                                  | DHCR7   | Homo sapiens |
| 1723  | dihydroorotate dehydrogenase                                    | DHODH   | Homo sapiens |
| 1725  | deoxyhypusine synthase                                          | DHPS    | Homo sapiens |
| 9249  | dehydrogenase/reductase (SDR family) member 3                   | DHRS3   | Homo sapiens |
| 10170 | dehydrogenase/reductase (SDR family) member 9                   | DHRS9   | Homo sapiens |
| 1665  | DEAH (Asp-Glu-Ala-His) box polypeptide 15                       | DHX15   | Homo sapiens |
| 54505 | DEAH (Asp-Glu-Ala-His) box polypeptide 29                       | DHX29   | Homo sapiens |
| 22907 | DEAH (Asp-Glu-Ala-His) box polypeptide 30                       | DHX30   | Homo sapiens |
| 1659  | DEAH (Asp-Glu-Ala-His) box polypeptide 8                        | DHX8    | Homo sapiens |
| 1660  | DEAH (Asp-Glu-Ala-His) box polypeptide 9                        | DHX9    | Homo sapiens |
| 23405 | dicer 1, ribonuclease type III                                  | DICER1  | Homo sapiens |
| 1733  | deiodinase, iodothyronine, type I                               | DIO1    | Homo sapiens |
| 1735  | deiodinase, iodothyronine, type III                             | DIO3    | Homo sapiens |
| 1736  | dyskeratosis congenita 1, dyskerin                              | DKC1    | Homo sapiens |
| 22943 | dickkopf homolog 1 ( <i>Xenopus laevis</i> )                    | DKK1    | Homo sapiens |
| 27122 | dickkopf homolog 3 ( <i>Xenopus laevis</i> )                    | DKK3    | Homo sapiens |
| 10395 | deleted in liver cancer 1                                       | DLC1    | Homo sapiens |
| 1738  | dihydrolipoamide dehydrogenase                                  | DLD     | Homo sapiens |
| 9940  | deleted in lung and esophageal cancer 1                         | DLEC1   | Homo sapiens |
| 1739  | discs, large homolog 1 ( <i>Drosophila</i> )                    | DLG1    | Homo sapiens |
| 1740  | discs, large homolog 2 ( <i>Drosophila</i> )                    | DLG2    | Homo sapiens |
| 1741  | discs, large homolog 3 ( <i>Drosophila</i> )                    | DLG3    | Homo sapiens |
| 9231  | discs, large homolog 5 ( <i>Drosophila</i> )                    | DLG5    | Homo sapiens |
| 9229  | discs, large ( <i>Drosophila</i> ) homolog-associated protein 1 | DLGAP1  | Homo sapiens |
| 9228  | discs, large ( <i>Drosophila</i> ) homolog-associated protein 2 | DLGAP2  | Homo sapiens |
| 22839 | discs, large ( <i>Drosophila</i> ) homolog-associated protein 4 | DLGAP4  | Homo sapiens |
| 1746  | distal-less homeobox 2                                          | DLX2    | Homo sapiens |
| 1748  | distal-less homeobox 4                                          | DLX4    | Homo sapiens |
| 1749  | distal-less homeobox 5                                          | DLX5    | Homo sapiens |
| 55929 | DNA methyltransferase 1 associated protein 1                    | DMAP1   | Homo sapiens |
| 1756  | dystrophin                                                      | DMD     | Homo sapiens |
| 9988  | cyclin D binding myb-like transcription factor 1                | DMTF1   | Homo sapiens |
| 1770  | dynein, axonemal, heavy chain 9                                 | DNAH9   | Homo sapiens |
| 10294 | DnaJ (Hsp40) homolog, subfamily A, member 2                     | DNAJA2  | Homo sapiens |
| 9093  | DnaJ (Hsp40) homolog, subfamily A, member 3                     | DNAJA3  | Homo sapiens |
| 3337  | DnaJ (Hsp40) homolog, subfamily B, member 1                     | DNAJB1  | Homo sapiens |
| 51726 | DnaJ (Hsp40) homolog, subfamily B, member 11                    | DNAJB11 | Homo sapiens |
| 25822 | DnaJ (Hsp40) homolog, subfamily B, member 5                     | DNAJB5  | Homo sapiens |
| 4189  | DnaJ (Hsp40) homolog, subfamily B, member 9                     | DNAJB9  | Homo sapiens |
| 23317 | DnaJ (Hsp40) homolog, subfamily C, member 13                    | DNAJC13 | Homo sapiens |
| 22826 | DnaJ (Hsp40) homolog, subfamily C, member 8                     | DNAJC8  | Homo sapiens |
| 10126 | dynein, axonemal, light chain 4                                 | DNAL4   | Homo sapiens |

|        |                                                                                                       |          |              |
|--------|-------------------------------------------------------------------------------------------------------|----------|--------------|
| 1773   | deoxyribonuclease I                                                                                   | DNASE1   | Homo sapiens |
| 1774   | deoxyribonuclease I-like 1                                                                            | DNASE1L1 | Homo sapiens |
| 1776   | deoxyribonuclease I-like 3                                                                            | DNASE1L3 | Homo sapiens |
| 1759   | dynamamin 1                                                                                           | DNM1     | Homo sapiens |
| 10059  | dynamamin 1-like                                                                                      | DNM1L    | Homo sapiens |
| 1786   | DNA (cytosine-5-)-methyltransferase 1                                                                 | DNMT1    | Homo sapiens |
| 1788   | DNA (cytosine-5-)-methyltransferase 3 alpha                                                           | DNMT3A   | Homo sapiens |
| 1789   | DNA (cytosine-5-)-methyltransferase 3 beta                                                            | DNMT3B   | Homo sapiens |
| 1793   | dedicator of cytokinesis 1                                                                            | DOCK1    | Homo sapiens |
| 1794   | dedicator of cytokinesis 2                                                                            | DOCK2    | Homo sapiens |
| 1796   | docking protein 1-like protein; docking protein 1, 62kDa (downstream of tyrosine kinase 1)            | DOK1     | Homo sapiens |
| 220077 | docking protein 1-like protein; docking protein 1, 62kDa (downstream of tyrosine kinase 1)            | DOK1     | Homo sapiens |
| 9046   | docking protein 2, 56kDa                                                                              | DOK2     | Homo sapiens |
| 55715  | docking protein 4                                                                                     | DOK4     | Homo sapiens |
| 55816  | docking protein 5                                                                                     | DOK5     | Homo sapiens |
| 1797   | dom-3 homolog Z (C. elegans)                                                                          | DOM3Z    | Homo sapiens |
| 64174  | dipeptidase 2                                                                                         | DPEP2    | Homo sapiens |
| 5977   | D4, zinc and double PHD fingers family 2                                                              | DPF2     | Homo sapiens |
| 8813   | dolichyl-phosphate mannosyltransferase polypeptide 1, catalytic subunit                               | DPM1     | Homo sapiens |
| 8818   | dolichyl-phosphate mannosyltransferase polypeptide 2, regulatory subunit                              | DPM2     | Homo sapiens |
| 1805   | dermatopontin                                                                                         | DPT      | Homo sapiens |
| 1806   | dihydropyrimidine dehydrogenase                                                                       | DPYD     | Homo sapiens |
| 1807   | dihydropyrimidinase                                                                                   | DPYS     | Homo sapiens |
| 1808   | dihydropyrimidinase-like 2                                                                            | DPYSL2   | Homo sapiens |
| 1809   | dihydropyrimidinase-like 3                                                                            | DPYSL3   | Homo sapiens |
| 1810   | down-regulator of transcription 1, TBP-binding (negative cofactor 2)                                  | DR1      | Homo sapiens |
| 1813   | dopamine receptor D2                                                                                  | DRD2     | Homo sapiens |
| 4733   | developmentally regulated GTP binding protein 1                                                       | DRG1     | Homo sapiens |
| 1821   | dystrophin related protein 2                                                                          | DRP2     | Homo sapiens |
| 1823   | desmocollin 1                                                                                         | DSC1     | Homo sapiens |
| 1824   | desmocollin 2                                                                                         | DSC2     | Homo sapiens |
| 1825   | desmocollin 3                                                                                         | DSC3     | Homo sapiens |
| 1826   | Down syndrome cell adhesion molecule                                                                  | DSCAM    | Homo sapiens |
| 10311  | Down syndrome critical region gene 3                                                                  | DSCR3    | Homo sapiens |
| 1829   | desmoglein 2                                                                                          | DSG2     | Homo sapiens |
| 1830   | desmoglein 3 (pemphigus vulgaris antigen)                                                             | DSG3     | Homo sapiens |
| 1832   | desmoplakin                                                                                           | DSP      | Homo sapiens |
| 667    | dystonin                                                                                              | DST      | Homo sapiens |
| 11034  | destrin (actin depolymerizing factor)                                                                 | DSTN     | Homo sapiens |
| 1838   | dystrobrevin, beta                                                                                    | DTNB     | Homo sapiens |
| 1841   | deoxythymidylate kinase (thymidylate kinase); similar to Deoxythymidylate kinase (thymidylate kinase) | DTYMK    | Homo sapiens |
| 727761 | deoxythymidylate kinase (thymidylate kinase); similar to                                              | DTYMK    | Homo sapiens |

|       |                                                                                         |        |              |
|-------|-----------------------------------------------------------------------------------------|--------|--------------|
|       | Deoxythymidylate kinase (thymidylate kinase)                                            |        |              |
| 53905 | dual oxidase 1                                                                          | DUOX1  | Homo sapiens |
| 50506 | dual oxidase 2                                                                          | DUOX2  | Homo sapiens |
| 1843  | dual specificity phosphatase 1                                                          | DUSP1  | Homo sapiens |
| 11221 | dual specificity phosphatase 10                                                         | DUSP10 | Homo sapiens |
| 8446  | dual specificity phosphatase 11 (RNA/RNP complex 1-interacting)                         | DUSP11 | Homo sapiens |
| 11072 | dual specificity phosphatase 14                                                         | DUSP14 | Homo sapiens |
| 1845  | dual specificity phosphatase 3                                                          | DUSP3  | Homo sapiens |
| 1846  | dual specificity phosphatase 4                                                          | DUSP4  | Homo sapiens |
| 1847  | dual specificity phosphatase 5                                                          | DUSP5  | Homo sapiens |
| 1848  | dual specificity phosphatase 6                                                          | DUSP6  | Homo sapiens |
| 1850  | dual specificity phosphatase 8                                                          | DUSP8  | Homo sapiens |
| 1854  | deoxyuridine triphosphatase                                                             | DUT    | Homo sapiens |
| 8215  | dishevelled, dsh homolog 1 (Drosophila); dishevelled, dsh homolog 1 (Drosophila)-like 1 | DVL1   | Homo sapiens |
| 1855  | dishevelled, dsh homolog 1 (Drosophila); dishevelled, dsh homolog 1 (Drosophila)-like 1 | DVL1   | Homo sapiens |
| 1857  | dishevelled, dsh homolog 3 (Drosophila)                                                 | DVL3   | Homo sapiens |
| 1859  | dual-specificity tyrosine-(Y)-phosphorylation regulated kinase 1A                       | DYRK1A | Homo sapiens |
| 8445  | dual-specificity tyrosine-(Y)-phosphorylation regulated kinase 2                        | DYRK2  | Homo sapiens |
| 8444  | dual-specificity tyrosine-(Y)-phosphorylation regulated kinase 3                        | DYRK3  | Homo sapiens |
| 8798  | dual-specificity tyrosine-(Y)-phosphorylation regulated kinase 4                        | DYRK4  | Homo sapiens |
| 1869  | E2F transcription factor 1                                                              | E2F1   | Homo sapiens |
| 1871  | E2F transcription factor 3                                                              | E2F3   | Homo sapiens |
| 1875  | E2F transcription factor 5, p130-binding                                                | E2F5   | Homo sapiens |
| 10682 | emopamil binding protein (sterol isomerase)                                             | EBP    | Homo sapiens |
| 1889  | endothelin converting enzyme 1                                                          | ECE1   | Homo sapiens |
| 9718  | endothelin converting enzyme 2                                                          | ECE2   | Homo sapiens |
| 1891  | enoyl Coenzyme A hydratase 1, peroxisomal                                               | ECH1   | Homo sapiens |
| 1892  | enoyl Coenzyme A hydratase, short chain, 1, mitochondrial                               | ECHS1  | Homo sapiens |
| 1893  | extracellular matrix protein 1                                                          | ECM1   | Homo sapiens |
| 1842  | extracellular matrix protein 2, female organ and adipocyte specific                     | ECM2   | Homo sapiens |
| 1894  | epithelial cell transforming sequence 2 oncogene                                        | ECT2   | Homo sapiens |
| 8721  | endothelial differentiation-related factor 1                                            | EDF1   | Homo sapiens |
| 10085 | EGF-like repeats and discoidin I-like domains 3                                         | EDIL3  | Homo sapiens |
| 1906  | endothelin 1                                                                            | EDN1   | Homo sapiens |
| 1907  | endothelin 2                                                                            | EDN2   | Homo sapiens |
| 1908  | endothelin 3                                                                            | EDN3   | Homo sapiens |
| 1909  | endothelin receptor type A                                                              | EDNRA  | Homo sapiens |
| 1910  | endothelin receptor type B                                                              | EDNRB  | Homo sapiens |
| 8411  | early endosome antigen 1                                                                | EEA1   | Homo sapiens |
| 8726  | embryonic ectoderm development                                                          | EED    | Homo sapiens |
| 9521  | eukaryotic translation elongation factor 1 epsilon 1                                    | EEF1E1 | Homo sapiens |
| 30008 | EGF-containing fibulin-like extracellular matrix protein 2                              | EFEMP2 | Homo sapiens |
| 80303 | EF-hand domain family, member D1                                                        | EFHD1  | Homo sapiens |
| 1942  | ephrin-A1                                                                               | EFNA1  | Homo sapiens |

|        |                                                                                                                                                   |          |              |
|--------|---------------------------------------------------------------------------------------------------------------------------------------------------|----------|--------------|
| 1947   | ephrin-B1                                                                                                                                         | EFNB1    | Homo sapiens |
| 1948   | ephrin-B2                                                                                                                                         | EFNB2    | Homo sapiens |
| 1949   | ephrin-B3                                                                                                                                         | EFNB3    | Homo sapiens |
| 10278  | embryonal Fyn-associated substrate                                                                                                                | EFS      | Homo sapiens |
| 1950   | epidermal growth factor (beta-urogastrone)                                                                                                        | EGF      | Homo sapiens |
| 1958   | early growth response 1                                                                                                                           | EGR1     | Homo sapiens |
| 1959   | early growth response 2                                                                                                                           | EGR2     | Homo sapiens |
| 1960   | early growth response 3                                                                                                                           | EGR3     | Homo sapiens |
| 26298  | ets homologous factor                                                                                                                             | EHF      | Homo sapiens |
| 1962   | enoyl-Coenzyme A, hydratase/3-hydroxyacyl Coenzyme A dehydrogenase                                                                                | EHHADH   | Homo sapiens |
| 9538   | etoposide induced 2.4 mRNA                                                                                                                        | EI24     | Homo sapiens |
| 9086   | eukaryotic translation initiation factor 1A, Y-linked                                                                                             | EIF1AY   | Homo sapiens |
| 8892   | eukaryotic translation initiation factor 2B, subunit 2 beta, 39kDa                                                                                | EIF2B2   | Homo sapiens |
| 8890   | eukaryotic translation initiation factor 2B, subunit 4 delta, 67kDa                                                                               | EIF2B4   | Homo sapiens |
| 8893   | eukaryotic translation initiation factor 2B, subunit 5 epsilon, 82kDa                                                                             | EIF2B5   | Homo sapiens |
| 27161  | eukaryotic translation initiation factor 2C, 2                                                                                                    | EIF2C2   | Homo sapiens |
| 1965   | eukaryotic translation initiation factor 2, subunit 1 alpha, 35kDa                                                                                | EIF2S1   | Homo sapiens |
| 8894   | eukaryotic translation initiation factor 2, subunit 2 beta, 38kDa                                                                                 | EIF2S2   | Homo sapiens |
| 1968   | eukaryotic translation initiation factor 2, subunit 3 gamma, 52kDa                                                                                | EIF2S3   | Homo sapiens |
| 1973   | similar to eukaryotic translation initiation factor 4A; small nucleolar RNA, H/ACA box 67; eukaryotic translation initiation factor 4A, isoform 1 | EIF4A1   | Homo sapiens |
| 26781  | similar to eukaryotic translation initiation factor 4A; small nucleolar RNA, H/ACA box 67; eukaryotic translation initiation factor 4A, isoform 1 | EIF4A1   | Homo sapiens |
| 728698 | similar to eukaryotic translation initiation factor 4A; small nucleolar RNA, H/ACA box 67; eukaryotic translation initiation factor 4A, isoform 1 | EIF4A1   | Homo sapiens |
| 1974   | similar to eukaryotic translation initiation factor 4A2; eukaryotic translation initiation factor 4A, isoform 2                                   | EIF4A2   | Homo sapiens |
| 286512 | similar to eukaryotic translation initiation factor 4A2; eukaryotic translation initiation factor 4A, isoform 2                                   | EIF4A2   | Homo sapiens |
| 643873 | similar to eukaryotic translation initiation factor 4H; eukaryotic translation initiation factor 4B                                               | EIF4B    | Homo sapiens |
| 1975   | similar to eukaryotic translation initiation factor 4H; eukaryotic translation initiation factor 4B                                               | EIF4B    | Homo sapiens |
| 1978   | eukaryotic translation initiation factor 4E binding protein 1                                                                                     | EIF4EBP1 | Homo sapiens |
| 1981   | eukaryotic translation initiation factor 4 gamma, 1                                                                                               | EIF4G1   | Homo sapiens |
| 1983   | eukaryotic translation initiation factor 5                                                                                                        | EIF5     | Homo sapiens |
| 143244 | eukaryotic translation initiation factor 5A; eukaryotic translation initiation factor 5A-like 1                                                   | EIF5A    | Homo sapiens |
| 1984   | eukaryotic translation initiation factor 5A; eukaryotic translation initiation factor 5A-like 1                                                   | EIF5A    | Homo sapiens |
| 56648  | eukaryotic translation initiation factor 5A2                                                                                                      | EIF5A2   | Homo sapiens |
| 1994   | ELAV (embryonic lethal, abnormal vision, Drosophila)-like 1 (Hu antigen R)                                                                        | ELAVL1   | Homo sapiens |
| 1996   | ELAV (embryonic lethal, abnormal vision, Drosophila)-like 4 (Hu antigen D)                                                                        | ELAVL4   | Homo sapiens |

|        |                                                                                                |         |              |
|--------|------------------------------------------------------------------------------------------------|---------|--------------|
| 1997   | E74-like factor 1 (ets domain transcription factor)                                            | ELF1    | Homo sapiens |
| 1998   | E74-like factor 2 (ets domain transcription factor)                                            | ELF2    | Homo sapiens |
| 1999   | E74-like factor 3 (ets domain transcription factor, epithelial-specific )                      | ELF3    | Homo sapiens |
| 2000   | E74-like factor 4 (ets domain transcription factor)                                            | ELF4    | Homo sapiens |
| 2002   | ELK1, member of ETS oncogene family                                                            | ELK1    | Homo sapiens |
| 2004   | ELK3, ETS-domain protein (SRF accessory protein 2)                                             | ELK3    | Homo sapiens |
| 2005   | ELK4, ETS-domain protein (SRF accessory protein 1)                                             | ELK4    | Homo sapiens |
| 8178   | elongation factor RNA polymerase II                                                            | ELL     | Homo sapiens |
| 22936  | elongation factor, RNA polymerase II, 2                                                        | ELL2    | Homo sapiens |
| 80237  | elongation factor RNA polymerase II-like 3                                                     | ELL3    | Homo sapiens |
| 9844   | engulfment and cell motility 1                                                                 | ELMO1   | Homo sapiens |
| 2006   | elastin                                                                                        | ELN     | Homo sapiens |
| 64834  | elongation of very long chain fatty acids (FEN1/Elo2, SUR4/Elo3, yeast)-like 1                 | ELOVL1  | Homo sapiens |
| 54898  | elongation of very long chain fatty acids (FEN1/Elo2, SUR4/Elo3, yeast)-like 2                 | ELOVL2  | Homo sapiens |
| 60481  | ELOVL family member 5, elongation of long chain fatty acids (FEN1/Elo2, SUR4/Elo3-like, yeast) | ELOVL5  | Homo sapiens |
| 79071  | ELOVL family member 6, elongation of long chain fatty acids (FEN1/Elo2, SUR4/Elo3-like, yeast) | ELOVL6  | Homo sapiens |
| 26610  | elongation protein 4 homolog ( <i>S. cerevisiae</i> )                                          | ELP4    | Homo sapiens |
| 2010   | emerin                                                                                         | EMD     | Homo sapiens |
| 2009   | echinoderm microtubule associated protein like 1                                               | EML1    | Homo sapiens |
| 24139  | echinoderm microtubule associated protein like 2                                               | EML2    | Homo sapiens |
| 2013   | epithelial membrane protein 2                                                                  | EMP2    | Homo sapiens |
| 2014   | epithelial membrane protein 3                                                                  | EMP3    | Homo sapiens |
| 8507   | ectodermal-neural cortex (with BTB-like domain)                                                | ENC1    | Homo sapiens |
| 2022   | endoglin                                                                                       | ENG     | Homo sapiens |
| 2023   | enolase 1, (alpha)                                                                             | ENO1    | Homo sapiens |
| 2026   | enolase 2 (gamma, neuronal)                                                                    | ENO2    | Homo sapiens |
| 2028   | glutamyl aminopeptidase (aminopeptidase A)                                                     | ENPEP   | Homo sapiens |
| 5167   | ectonucleotide pyrophosphatase/phosphodiesterase 1                                             | ENPP1   | Homo sapiens |
| 5168   | ectonucleotide pyrophosphatase/phosphodiesterase 2                                             | ENPP2   | Homo sapiens |
| 133121 | ectonucleotide pyrophosphatase/phosphodiesterase 6                                             | ENPP6   | Homo sapiens |
| 2029   | endosulfine alpha                                                                              | ENSA    | Homo sapiens |
| 954    | ectonucleoside triphosphate diphosphohydrolase 2                                               | ENTPD2  | Homo sapiens |
| 956    | ectonucleoside triphosphate diphosphohydrolase 3                                               | ENTPD3  | Homo sapiens |
| 957    | ectonucleoside triphosphate diphosphohydrolase 5                                               | ENTPD5  | Homo sapiens |
| 377841 | ectonucleoside triphosphate diphosphohydrolase 8                                               | ENTPD8  | Homo sapiens |
| 2033   | E1A binding protein p300                                                                       | EP300   | Homo sapiens |
| 57634  | E1A binding protein p400                                                                       | EP400   | Homo sapiens |
| 2034   | endothelial PAS domain protein 1                                                               | EPAS1   | Homo sapiens |
| 2035   | erythrocyte membrane protein band 4.1 (elliptocytosis 1, RH-linked)                            | EPB41   | Homo sapiens |
| 2036   | erythrocyte membrane protein band 4.1-like 1                                                   | EPB41L1 | Homo sapiens |
| 23136  | erythrocyte membrane protein band 4.1-like 3                                                   | EPB41L3 | Homo sapiens |
| 2038   | erythrocyte membrane protein band 4.2                                                          | EPB42   | Homo sapiens |
| 80314  | enhancer of polycomb homolog 1 ( <i>Drosophila</i> )                                           | EPC1    | Homo sapiens |



|        |                                                                                                                                     |       |              |
|--------|-------------------------------------------------------------------------------------------------------------------------------------|-------|--------------|
| 2041   | EPH receptor A1                                                                                                                     | EPHA1 | Homo sapiens |
| 2043   | EPH receptor A4                                                                                                                     | EPHA4 | Homo sapiens |
| 2044   | EPH receptor A5                                                                                                                     | EPHA5 | Homo sapiens |
| 2048   | EPH receptor B2                                                                                                                     | EPHB2 | Homo sapiens |
| 2050   | EPH receptor B4                                                                                                                     | EPHB4 | Homo sapiens |
| 2052   | epoxide hydrolase 1, microsomal (xenobiotic)                                                                                        | EPHX1 | Homo sapiens |
| 7957   | epilepsy, progressive myoclonus type 2A, Lafora disease (laforin)                                                                   | EPM2A | Homo sapiens |
| 22905  | epsin 2                                                                                                                             | EPN2  | Homo sapiens |
| 2056   | erythropoietin                                                                                                                      | EPO   | Homo sapiens |
| 2057   | erythropoietin receptor                                                                                                             | EPOR  | Homo sapiens |
| 2058   | glutamyl-prolyl-tRNA synthetase                                                                                                     | EPRS  | Homo sapiens |
| 2060   | epidermal growth factor receptor pathway substrate 15                                                                               | EPS15 | Homo sapiens |
| 2059   | epidermal growth factor receptor pathway substrate 8                                                                                | EPS8  | Homo sapiens |
| 26284  | Era G-protein-like 1 (E. coli)                                                                                                      | ERAL1 | Homo sapiens |
| 2064   | v-erb-b2 erythroblastic leukemia viral oncogene homolog 2, neuro/glioblastoma derived oncogene homolog (avian)                      | ERBB2 | Homo sapiens |
| 2065   | v-erb-b2 erythroblastic leukemia viral oncogene homolog 3 (avian)                                                                   | ERBB3 | Homo sapiens |
| 2066   | v-erb-a erythroblastic leukemia viral oncogene homolog 4 (avian)                                                                    | ERBB4 | Homo sapiens |
| 2067   | excision repair cross-complementing rodent repair deficiency, complementation group 1 (includes overlapping antisense sequence)     | ERCC1 | Homo sapiens |
| 2068   | excision repair cross-complementing rodent repair deficiency, complementation group 2                                               | ERCC2 | Homo sapiens |
| 2071   | excision repair cross-complementing rodent repair deficiency, complementation group 3 (xeroderma pigmentosum group B complementing) | ERCC3 | Homo sapiens |
| 2073   | excision repair cross-complementing rodent repair deficiency, complementation group 5                                               | ERCC5 | Homo sapiens |
| 2069   | epiregulin                                                                                                                          | EREG  | Homo sapiens |
| 2078   | v-ets erythroblastosis virus E26 oncogene homolog (avian)                                                                           | ERG   | Homo sapiens |
| 2081   | endoplasmic reticulum to nucleus signaling 1                                                                                        | ERN1  | Homo sapiens |
| 2098   | esterase D/formylglutathione hydrolase                                                                                              | ESD   | Homo sapiens |
| 11082  | endothelial cell-specific molecule 1                                                                                                | ESM1  | Homo sapiens |
| 2099   | estrogen receptor 1                                                                                                                 | ESR1  | Homo sapiens |
| 2103   | estrogen-related receptor beta                                                                                                      | ESRRB | Homo sapiens |
| 2104   | estrogen-related receptor gamma                                                                                                     | ESRRG | Homo sapiens |
| 2107   | eukaryotic translation termination factor 1                                                                                         | ETF1  | Homo sapiens |
| 2108   | electron-transfer-flavoprotein, alpha polypeptide                                                                                   | ETFA  | Homo sapiens |
| 2109   | electron-transfer-flavoprotein, beta polypeptide                                                                                    | ETFB  | Homo sapiens |
| 2110   | electron-transferring-flavoprotein dehydrogenase                                                                                    | ETFDH | Homo sapiens |
| 55500  | ethanolamine kinase 1                                                                                                               | ETNK1 | Homo sapiens |
| 55224  | ethanolamine kinase 2                                                                                                               | ETNK2 | Homo sapiens |
| 2114   | v-ets erythroblastosis virus E26 oncogene homolog 2 (avian)                                                                         | ETS2  | Homo sapiens |
| 2117   | ets variant 3                                                                                                                       | ETV3  | Homo sapiens |
| 2118   | ets variant 4                                                                                                                       | ETV4  | Homo sapiens |
| 2120   | ets variant 6                                                                                                                       | ETV6  | Homo sapiens |
| 2124   | ecotropic viral integration site 2B                                                                                                 | EVI2B | Homo sapiens |
| 115704 | ecotropic viral integration site 5-like                                                                                             | EVI5L | Homo sapiens |

|        |                                                                                                                                                                                                         |        |              |
|--------|---------------------------------------------------------------------------------------------------------------------------------------------------------------------------------------------------------|--------|--------------|
| 2125   | envoplakin                                                                                                                                                                                              | EVPL   | Homo sapiens |
| 2128   | even-skipped homeobox 1                                                                                                                                                                                 | EVX1   | Homo sapiens |
| 2130   | similar to Ewing sarcoma breakpoint region 1; Ewing sarcoma breakpoint region 1                                                                                                                         | EWSR1  | Homo sapiens |
| 284685 | similar to Ewing sarcoma breakpoint region 1; Ewing sarcoma breakpoint region 1                                                                                                                         | EWSR1  | Homo sapiens |
| 9156   | exonuclease 1                                                                                                                                                                                           | EXO1   | Homo sapiens |
| 51013  | exosome component 1                                                                                                                                                                                     | EXOSC1 | Homo sapiens |
| 23016  | exosome component 7                                                                                                                                                                                     | EXOSC7 | Homo sapiens |
| 2131   | exostoses (multiple) 1                                                                                                                                                                                  | EXT1   | Homo sapiens |
| 2132   | exostoses (multiple) 2                                                                                                                                                                                  | EXT2   | Homo sapiens |
| 2135   | exostoses (multiple)-like 2                                                                                                                                                                             | EXTL2  | Homo sapiens |
| 2139   | eyes absent homolog 2 (Drosophila)                                                                                                                                                                      | EYA2   | Homo sapiens |
| 2140   | eyes absent homolog 3 (Drosophila)                                                                                                                                                                      | EYA3   | Homo sapiens |
| 2145   | enhancer of zeste homolog 1 (Drosophila)                                                                                                                                                                | EZH1   | Homo sapiens |
| 2146   | enhancer of zeste homolog 2 (Drosophila)                                                                                                                                                                | EZH2   | Homo sapiens |
| 2159   | coagulation factor X                                                                                                                                                                                    | F10    | Homo sapiens |
| 2160   | coagulation factor XI                                                                                                                                                                                   | F11    | Homo sapiens |
| 50848  | F11 receptor                                                                                                                                                                                            | F11R   | Homo sapiens |
| 2147   | coagulation factor II (thrombin)                                                                                                                                                                        | F2     | Homo sapiens |
| 2149   | coagulation factor II (thrombin) receptor                                                                                                                                                               | F2R    | Homo sapiens |
| 2150   | coagulation factor II (thrombin) receptor-like 1                                                                                                                                                        | F2RL1  | Homo sapiens |
| 9002   | coagulation factor II (thrombin) receptor-like 3                                                                                                                                                        | F2RL3  | Homo sapiens |
| 2152   | coagulation factor III (thromboplastin, tissue factor)                                                                                                                                                  | F3     | Homo sapiens |
| 2153   | coagulation factor V (proaccelerin, labile factor)                                                                                                                                                      | F5     | Homo sapiens |
| 2155   | coagulation factor VII (serum prothrombin conversion accelerator)                                                                                                                                       | F7     | Homo sapiens |
| 2157   | coagulation factor VIII, procoagulant component                                                                                                                                                         | F8     | Homo sapiens |
| 79152  | fatty acid 2-hydroxylase                                                                                                                                                                                | FA2H   | Homo sapiens |
| 2166   | fatty acid amide hydrolase                                                                                                                                                                              | FAAH   | Homo sapiens |
| 2168   | fatty acid binding protein 1, liver                                                                                                                                                                     | FABP1  | Homo sapiens |
| 2167   | fatty acid binding protein 4, adipocyte                                                                                                                                                                 | FABP4  | Homo sapiens |
| 728729 | fatty acid binding protein 5-like 2; fatty acid binding protein 5 (psoriasis-associated); fatty acid binding protein 5-like 8; fatty acid binding protein 5-like 7; fatty acid binding protein 5-like 9 | FABP5  | Homo sapiens |
| 729163 | fatty acid binding protein 5-like 2; fatty acid binding protein 5 (psoriasis-associated); fatty acid binding protein 5-like 8; fatty acid binding protein 5-like 7; fatty acid binding protein 5-like 9 | FABP5  | Homo sapiens |
| 642956 | fatty acid binding protein 5-like 2; fatty acid binding protein 5 (psoriasis-associated); fatty acid binding protein 5-like 8; fatty acid binding protein 5-like 7; fatty acid binding protein 5-like 9 | FABP5  | Homo sapiens |
| 2171   | fatty acid binding protein 5-like 2; fatty acid binding protein 5 (psoriasis-associated); fatty acid binding protein 5-like 8; fatty acid binding protein 5-like 7; fatty acid binding protein 5-like 9 | FABP5  | Homo sapiens |
| 728641 | fatty acid binding protein 5-like 2; fatty acid binding protein 5 (psoriasis-associated); fatty acid binding protein 5-like 8; fatty acid binding protein 5-like 7; fatty acid binding protein 5-like 9 | FABP5  | Homo sapiens |
| 2172   | fatty acid binding protein 6, ileal                                                                                                                                                                     | FABP6  | Homo sapiens |
| 2173   | fatty acid binding protein 7, brain                                                                                                                                                                     | FABP7  | Homo sapiens |

|       |                                                                                                                           |        |              |
|-------|---------------------------------------------------------------------------------------------------------------------------|--------|--------------|
| 8772  | Fas (TNFRSF6)-associated via death domain                                                                                 | FADD   | Homo sapiens |
| 9415  | fatty acid desaturase 2                                                                                                   | FADS2  | Homo sapiens |
| 3995  | fatty acid desaturase 3                                                                                                   | FADS3  | Homo sapiens |
| 2184  | fumarylacetoacetate hydrolase (fumarylacetoacetase)                                                                       | FAH    | Homo sapiens |
| 55179 | Fas apoptotic inhibitory molecule                                                                                         | FAIM   | Homo sapiens |
| 23017 | Fas apoptotic inhibitory molecule 2                                                                                       | FAIM2  | Homo sapiens |
| 60343 | family with sequence similarity 3, member A                                                                               | FAM3A  | Homo sapiens |
| 55578 | family with sequence similarity 48, member A                                                                              | FAM48A | Homo sapiens |
| 51439 | family with sequence similarity 8, member A1                                                                              | FAM8A1 | Homo sapiens |
| 2176  | Fanconi anemia, complementation group C                                                                                   | FANCC  | Homo sapiens |
| 2189  | Fanconi anemia, complementation group G                                                                                   | FANCG  | Homo sapiens |
| 55120 | Fanconi anemia, complementation group L                                                                                   | FANCL  | Homo sapiens |
| 2191  | fibroblast activation protein, alpha                                                                                      | FAP    | Homo sapiens |
| 10160 | FERM, RhoGEF (ARHGEF) and pleckstrin domain protein 1 (chondrocyte-derived)                                               | FARP1  | Homo sapiens |
| 2194  | fatty acid synthase                                                                                                       | FASN   | Homo sapiens |
| 2091  | fibrillarlin                                                                                                              | FBL    | Homo sapiens |
| 2192  | fibulin 1                                                                                                                 | FBLN1  | Homo sapiens |
| 2199  | fibulin 2                                                                                                                 | FBLN2  | Homo sapiens |
| 10516 | fibulin 5                                                                                                                 | FBLN5  | Homo sapiens |
| 2203  | fructose-1,6-bisphosphatase 1                                                                                             | FBP1   | Homo sapiens |
| 8789  | fructose-1,6-bisphosphatase 2                                                                                             | FBP2   | Homo sapiens |
| 25827 | F-box and leucine-rich repeat protein 2                                                                                   | FBXL2  | Homo sapiens |
| 26235 | F-box and leucine-rich repeat protein 4                                                                                   | FBXL4  | Homo sapiens |
| 23014 | F-box protein 21                                                                                                          | FBXO21 | Homo sapiens |
| 26271 | F-box protein 5                                                                                                           | FBXO5  | Homo sapiens |
| 26268 | F-box protein 9                                                                                                           | FBXO9  | Homo sapiens |
| 23291 | F-box and WD repeat domain containing 11                                                                                  | FBXW11 | Homo sapiens |
| 55294 | F-box and WD repeat domain containing 7                                                                                   | FBXW7  | Homo sapiens |
| 2207  | Fc fragment of IgE, high affinity I, receptor for; gamma polypeptide                                                      | FCER1G | Homo sapiens |
| 2208  | Fc fragment of IgE, low affinity II, receptor for (CD23)                                                                  | FCER2  | Homo sapiens |
| 9103  | Fc fragment of IgG, low affinity IIb, receptor (CD32); Fc fragment of IgG, low affinity IIc, receptor for (CD32)          | FCGR2B | Homo sapiens |
| 2213  | Fc fragment of IgG, low affinity IIb, receptor (CD32); Fc fragment of IgG, low affinity IIc, receptor for (CD32)          | FCGR2B | Homo sapiens |
| 2217  | Fc fragment of IgG, receptor, transporter, alpha                                                                          | FCGRT  | Homo sapiens |
| 2219  | ficolin (collagen/fibrinogen domain containing) 1                                                                         | FCN1   | Homo sapiens |
| 8547  | ficolin (collagen/fibrinogen domain containing) 3 (Hakata antigen)                                                        | FCN3   | Homo sapiens |
| 2222  | farnesyl-diphosphate farnesyltransferase 1                                                                                | FDFT1  | Homo sapiens |
| 2224  | farnesyl diphosphate synthase (farnesyl pyrophosphate synthetase, dimethylallyltranstransferase, geranyltranstransferase) | FDPS   | Homo sapiens |
| 2230  | ferredoxin 1                                                                                                              | FDX1   | Homo sapiens |
| 2232  | ferredoxin reductase                                                                                                      | FDXR   | Homo sapiens |
| 2235  | ferrochelatase (protoporphyrin)                                                                                           | FECH   | Homo sapiens |
| 10116 | fem-1 homolog b (C. elegans)                                                                                              | FEM1B  | Homo sapiens |
| 2237  | flap structure-specific endonuclease 1                                                                                    | FEN1   | Homo sapiens |
| 2241  | fer (fps/fes related) tyrosine kinase                                                                                     | FER    | Homo sapiens |

|           |                                                                                                                             |        |              |
|-----------|-----------------------------------------------------------------------------------------------------------------------------|--------|--------------|
| 26998     | fetuin B                                                                                                                    | FETUB  | Homo sapiens |
| 2243      | fibrinogen alpha chain                                                                                                      | FGA    | Homo sapiens |
| 2245      | FYVE, RhoGEF and PH domain containing 1                                                                                     | FGD1   | Homo sapiens |
| 2246      | fibroblast growth factor 1 (acidic)                                                                                         | FGF1   | Homo sapiens |
| 2257      | fibroblast growth factor 12                                                                                                 | FGF12  | Homo sapiens |
| 8817      | fibroblast growth factor 18                                                                                                 | FGF18  | Homo sapiens |
| 2247      | fibroblast growth factor 2 (basic)                                                                                          | FGF2   | Homo sapiens |
| 26281     | fibroblast growth factor 20                                                                                                 | FGF20  | Homo sapiens |
| 2248      | fibroblast growth factor 3 (murine mammary tumor virus integration site (v-int-2) oncogene homolog)                         | FGF3   | Homo sapiens |
| 394217    | hypothetical LOC100132771; fibroblast growth factor 7 (keratinocyte growth factor); fibroblast growth factor 7 pseudogene 2 | FGF7   | Homo sapiens |
| 2252      | hypothetical LOC100132771; fibroblast growth factor 7 (keratinocyte growth factor); fibroblast growth factor 7 pseudogene 2 | FGF7   | Homo sapiens |
| 100132771 | hypothetical LOC100132771; fibroblast growth factor 7 (keratinocyte growth factor); fibroblast growth factor 7 pseudogene 2 | FGF7   | Homo sapiens |
| 2260      | fibroblast growth factor receptor 1                                                                                         | FGFR1  | Homo sapiens |
| 2261      | fibroblast growth factor receptor 3                                                                                         | FGFR3  | Homo sapiens |
| 2264      | fibroblast growth factor receptor 4                                                                                         | FGFR4  | Homo sapiens |
| 2267      | fibrinogen-like 1                                                                                                           | FGL1   | Homo sapiens |
| 10875     | fibrinogen-like 2                                                                                                           | FGL2   | Homo sapiens |
| 2268      | Gardner-Rasheed feline sarcoma viral (v-fgr) oncogene homolog                                                               | FGR    | Homo sapiens |
| 2271      | fumarate hydratase                                                                                                          | FH     | Homo sapiens |
| 2273      | four and a half LIM domains 1                                                                                               | FHL1   | Homo sapiens |
| 2274      | four and a half LIM domains 2                                                                                               | FHL2   | Homo sapiens |
| 9158      | fibroblast growth factor (acidic) intracellular binding protein                                                             | FIBP   | Homo sapiens |
| 2277      | c-fos induced growth factor (vascular endothelial growth factor D)                                                          | FIGF   | Homo sapiens |
| 63979     | fidgetin-like 1                                                                                                             | FIGNL1 | Homo sapiens |
| 2286      | FK506 binding protein 2, 13kDa                                                                                              | FKBP2  | Homo sapiens |
| 2288      | FK506 binding protein 4, 59kDa                                                                                              | FKBP4  | Homo sapiens |
| 23770     | FK506 binding protein 8, 38kDa                                                                                              | FKBP8  | Homo sapiens |
| 2314      | flightless I homolog (Drosophila)                                                                                           | FLII   | Homo sapiens |
| 2316      | filamin A, alpha (actin binding protein 280)                                                                                | FLNA   | Homo sapiens |
| 2317      | filamin B, beta (actin binding protein 278)                                                                                 | FLNB   | Homo sapiens |
| 2318      | filamin C, gamma (actin binding protein 280)                                                                                | FLNC   | Homo sapiens |
| 10211     | flotillin 1                                                                                                                 | FLOT1  | Homo sapiens |
| 2319      | flotillin 2                                                                                                                 | FLOT2  | Homo sapiens |
| 23769     | fibronectin leucine rich transmembrane protein 1                                                                            | FLRT1  | Homo sapiens |
| 2322      | fms-related tyrosine kinase 3                                                                                               | FLT3   | Homo sapiens |
| 2323      | fms-related tyrosine kinase 3 ligand                                                                                        | FLT3LG | Homo sapiens |
| 2324      | fms-related tyrosine kinase 4                                                                                               | FLT4   | Homo sapiens |
| 752       | formin-like 1                                                                                                               | FMNL1  | Homo sapiens |
| 2326      | flavin containing monooxygenase 1                                                                                           | FMO1   | Homo sapiens |
| 2327      | flavin containing monooxygenase 2 (non-functional)                                                                          | FMO2   | Homo sapiens |
| 2329      | flavin containing monooxygenase 4                                                                                           | FMO4   | Homo sapiens |
| 2330      | flavin containing monooxygenase 5                                                                                           | FMO5   | Homo sapiens |
| 2331      | fibromodulin                                                                                                                | FMOD   | Homo sapiens |

|        |                                                                                                                                                             |       |              |
|--------|-------------------------------------------------------------------------------------------------------------------------------------------------------------|-------|--------------|
| 2335   | fibronectin 1                                                                                                                                               | FN1   | Homo sapiens |
| 23360  | formin binding protein 4                                                                                                                                    | FNBP4 | Homo sapiens |
| 2342   | farnesyltransferase, CAAX box, beta                                                                                                                         | FNTB  | Homo sapiens |
| 2348   | folate receptor 1 (adult)                                                                                                                                   | FOLR1 | Homo sapiens |
| 2350   | folate receptor 2 (fetal)                                                                                                                                   | FOLR2 | Homo sapiens |
| 2352   | folate receptor 3 (gamma)                                                                                                                                   | FOLR3 | Homo sapiens |
| 2353   | v-fos FBJ murine osteosarcoma viral oncogene homolog                                                                                                        | FOS   | Homo sapiens |
| 2354   | FBJ murine osteosarcoma viral oncogene homolog B                                                                                                            | FOSB  | Homo sapiens |
| 8061   | FOS-like antigen 1                                                                                                                                          | FOSL1 | Homo sapiens |
| 2355   | FOS-like antigen 2                                                                                                                                          | FOSL2 | Homo sapiens |
| 3170   | forkhead box A2                                                                                                                                             | FOXA2 | Homo sapiens |
| 3171   | forkhead box A3                                                                                                                                             | FOXA3 | Homo sapiens |
| 2296   | forkhead box C1                                                                                                                                             | FOXC1 | Homo sapiens |
| 2306   | forkhead box D2                                                                                                                                             | FOXD2 | Homo sapiens |
| 2294   | forkhead box F1                                                                                                                                             | FOXF1 | Homo sapiens |
| 2295   | forkhead box F2                                                                                                                                             | FOXF2 | Homo sapiens |
| 2299   | forkhead box I1                                                                                                                                             | FOXI1 | Homo sapiens |
| 2302   | forkhead box J1                                                                                                                                             | FOXJ1 | Homo sapiens |
| 55810  | forkhead box J2                                                                                                                                             | FOXJ2 | Homo sapiens |
| 22887  | forkhead box J3                                                                                                                                             | FOXJ3 | Homo sapiens |
| 2305   | forkhead box M1                                                                                                                                             | FOXM1 | Homo sapiens |
| 94234  | forkhead box Q1                                                                                                                                             | FOXQ1 | Homo sapiens |
| 2356   | folypolyglutamate synthase                                                                                                                                  | FPGS  | Homo sapiens |
| 51086  | TNNI3 interacting kinase; fucose-1-phosphate guanylyltransferase                                                                                            | FPGT  | Homo sapiens |
| 8790   | TNNI3 interacting kinase; fucose-1-phosphate guanylyltransferase                                                                                            | FPGT  | Homo sapiens |
| 2487   | frizzled-related protein                                                                                                                                    | FRZB  | Homo sapiens |
| 25794  | fascin homolog 2, actin-bundling protein, retinal (Strongylocentrotus purpuratus)                                                                           | FSCN2 | Homo sapiens |
| 10468  | follistatin                                                                                                                                                 | FST   | Homo sapiens |
| 10272  | follistatin-like 3 (secreted glycoprotein)                                                                                                                  | FSTL3 | Homo sapiens |
| 2508   | ferritin, heavy polypeptide 1; ferritin, heavy polypeptide-like 16; similar to ferritin, heavy polypeptide 1; ferritin, heavy polypeptide-like 3 pseudogene | FTH1  | Homo sapiens |
| 729009 | ferritin, heavy polypeptide 1; ferritin, heavy polypeptide-like 16; similar to ferritin, heavy polypeptide 1; ferritin, heavy polypeptide-like 3 pseudogene | FTH1  | Homo sapiens |
| 2495   | ferritin, heavy polypeptide 1; ferritin, heavy polypeptide-like 16; similar to ferritin, heavy polypeptide 1; ferritin, heavy polypeptide-like 3 pseudogene | FTH1  | Homo sapiens |
| 2498   | ferritin, heavy polypeptide 1; ferritin, heavy polypeptide-like 16; similar to ferritin, heavy polypeptide 1; ferritin, heavy polypeptide-like 3 pseudogene | FTH1  | Homo sapiens |
| 24140  | FtsJ homolog 1 (E. coli)                                                                                                                                    | FTSJ1 | Homo sapiens |
| 8880   | far upstream element (FUSE) binding protein 1                                                                                                               | FUBP1 | Homo sapiens |
| 5045   | furin (paired basic amino acid cleaving enzyme)                                                                                                             | FURIN | Homo sapiens |
| 2521   | fusion (involved in t(12;16) in malignant liposarcoma)                                                                                                      | FUS   | Homo sapiens |
| 2523   | fucosyltransferase 1 (galactoside 2-alpha-L-fucosyltransferase, H blood group)                                                                              | FUT1  | Homo sapiens |

|        |                                                                                                                                                                                                  |         |              |
|--------|--------------------------------------------------------------------------------------------------------------------------------------------------------------------------------------------------|---------|--------------|
| 2530   | fucosyltransferase 8 (alpha (1,6) fucosyltransferase)                                                                                                                                            | FUT8    | Homo sapiens |
| 2395   | frataxin                                                                                                                                                                                         | FXN     | Homo sapiens |
| 8087   | fragile X mental retardation, autosomal homolog 1                                                                                                                                                | FXR1    | Homo sapiens |
| 486    | FXD domain containing ion transport regulator 2                                                                                                                                                  | FXD2    | Homo sapiens |
| 5349   | FXD domain containing ion transport regulator 3                                                                                                                                                  | FXD3    | Homo sapiens |
| 53827  | FXD domain containing ion transport regulator 5                                                                                                                                                  | FXD5    | Homo sapiens |
| 2533   | FYN binding protein (FYB-120/130)                                                                                                                                                                | FYB     | Homo sapiens |
| 2534   | FYN oncogene related to SRC, FGR, YES                                                                                                                                                            | FYN     | Homo sapiens |
| 8321   | frizzled homolog 1 (Drosophila)                                                                                                                                                                  | FZD1    | Homo sapiens |
| 2535   | frizzled homolog 2 (Drosophila)                                                                                                                                                                  | FZD2    | Homo sapiens |
| 8322   | frizzled homolog 4 (Drosophila)                                                                                                                                                                  | FZD4    | Homo sapiens |
| 7855   | frizzled homolog 5 (Drosophila)                                                                                                                                                                  | FZD5    | Homo sapiens |
| 8323   | frizzled homolog 6 (Drosophila)                                                                                                                                                                  | FZD6    | Homo sapiens |
| 8324   | frizzled homolog 7 (Drosophila)                                                                                                                                                                  | FZD7    | Homo sapiens |
| 51343  | fizzy/cell division cycle 20 related 1 (Drosophila)                                                                                                                                              | FZR1    | Homo sapiens |
| 2538   | glucose-6-phosphatase, catalytic subunit                                                                                                                                                         | G6PC    | Homo sapiens |
| 2539   | glucose-6-phosphate dehydrogenase                                                                                                                                                                | G6PD    | Homo sapiens |
| 2549   | GRB2-associated binding protein 1                                                                                                                                                                | GAB1    | Homo sapiens |
| 9846   | GRB2-associated binding protein 2                                                                                                                                                                | GAB2    | Homo sapiens |
| 11337  | GABA(A) receptor-associated protein                                                                                                                                                              | GABARAP | Homo sapiens |
| 2551   | GA binding protein transcription factor, alpha subunit 60kDa                                                                                                                                     | GABPA   | Homo sapiens |
| 126626 | GA binding protein transcription factor, beta subunit 2                                                                                                                                          | GABPB2  | Homo sapiens |
| 2554   | gamma-aminobutyric acid (GABA) A receptor, alpha 1                                                                                                                                               | GABRA1  | Homo sapiens |
| 2555   | gamma-aminobutyric acid (GABA) A receptor, alpha 2                                                                                                                                               | GABRA2  | Homo sapiens |
| 2559   | gamma-aminobutyric acid (GABA) A receptor, alpha 6                                                                                                                                               | GABRA6  | Homo sapiens |
| 2560   | gamma-aminobutyric acid (GABA) A receptor, beta 1                                                                                                                                                | GABRB1  | Homo sapiens |
| 2562   | gamma-aminobutyric acid (GABA) A receptor, beta 3                                                                                                                                                | GABRB3  | Homo sapiens |
| 2563   | gamma-aminobutyric acid (GABA) A receptor, delta                                                                                                                                                 | GABRD   | Homo sapiens |
| 2564   | gamma-aminobutyric acid (GABA) A receptor, epsilon                                                                                                                                               | GABRE   | Homo sapiens |
| 2566   | gamma-aminobutyric acid (GABA) A receptor, gamma 2                                                                                                                                               | GABRG2  | Homo sapiens |
| 2568   | gamma-aminobutyric acid (GABA) A receptor, pi                                                                                                                                                    | GABRP   | Homo sapiens |
| 2571   | glutamate decarboxylase 1 (brain, 67kDa)                                                                                                                                                         | GAD1    | Homo sapiens |
| 10912  | growth arrest and DNA-damage-inducible, gamma                                                                                                                                                    | GADD45G | Homo sapiens |
| 2580   | cyclin G associated kinase                                                                                                                                                                       | GAK     | Homo sapiens |
| 51083  | galanin prepropeptide                                                                                                                                                                            | GAL     | Homo sapiens |
| 2582   | UDP-galactose-4-epimerase                                                                                                                                                                        | GALE    | Homo sapiens |
| 2584   | galactokinase 1                                                                                                                                                                                  | GALK1   | Homo sapiens |
| 2585   | galactokinase 2                                                                                                                                                                                  | GALK2   | Homo sapiens |
| 2589   | UDP-N-acetyl-alpha-D-galactosamine:polypeptide N-acetylgalactosaminyltransferase 13 (GalNAc-T13); UDP-N-acetyl-alpha-D-galactosamine:polypeptide N-acetylgalactosaminyltransferase 1 (GalNAc-T1) | GALNT1  | Homo sapiens |
| 114805 | UDP-N-acetyl-alpha-D-galactosamine:polypeptide N-acetylgalactosaminyltransferase 13 (GalNAc-T13); UDP-N-acetyl-alpha-D-galactosamine:polypeptide N-acetylgalactosaminyltransferase 1 (GalNAc-T1) | GALNT1  | Homo sapiens |
| 2591   | UDP-N-acetyl-alpha-D-galactosamine:polypeptide N-                                                                                                                                                | GALNT3  | Homo sapiens |

|        |                                                                                                                                  |        |              |
|--------|----------------------------------------------------------------------------------------------------------------------------------|--------|--------------|
|        | acetylgalactosaminyltransferase 3 (GalNAc-T3)                                                                                    |        |              |
| 8484   | galanin receptor 3                                                                                                               | GALR3  | Homo sapiens |
| 2592   | galactose-1-phosphate uridylyltransferase                                                                                        | GALT   | Homo sapiens |
| 2593   | guanidinoacetate N-methyltransferase                                                                                             | GAMT   | Homo sapiens |
| 2596   | growth associated protein 43                                                                                                     | GAP43  | Homo sapiens |
| 2617   | glycyl-tRNA synthetase                                                                                                           | GARS   | Homo sapiens |
| 2618   | phosphoribosylglycinamide formyltransferase,<br>phosphoribosylglycinamide synthetase,<br>phosphoribosylaminoimidazole synthetase | GART   | Homo sapiens |
| 10634  | growth arrest-specific 2 like 1                                                                                                  | GAS2L1 | Homo sapiens |
| 2621   | similar to growth arrest-specific 6; growth arrest-specific 6                                                                    | GAS6   | Homo sapiens |
| 732446 | similar to growth arrest-specific 6; growth arrest-specific 6                                                                    | GAS6   | Homo sapiens |
| 8522   | growth arrest-specific 7                                                                                                         | GAS7   | Homo sapiens |
| 2622   | growth arrest-specific 8                                                                                                         | GAS8   | Homo sapiens |
| 2624   | GATA binding protein 2                                                                                                           | GATA2  | Homo sapiens |
| 2625   | GATA binding protein 3                                                                                                           | GATA3  | Homo sapiens |
| 2626   | GATA binding protein 4                                                                                                           | GATA4  | Homo sapiens |
| 2627   | GATA binding protein 6                                                                                                           | GATA6  | Homo sapiens |
| 2629   | glucosidase, beta; acid (includes glucosylceramidase)                                                                            | GBA    | Homo sapiens |
| 57704  | glucosidase, beta (bile acid) 2                                                                                                  | GBA2   | Homo sapiens |
| 8729   | golgi-specific brefeldin A resistant guanine nucleotide exchange factor 1                                                        | GBF1   | Homo sapiens |
| 2633   | guanylate binding protein 1, interferon-inducible, 67kDa                                                                         | GBP1   | Homo sapiens |
| 2634   | guanylate binding protein 2, interferon-inducible                                                                                | GBP2   | Homo sapiens |
| 2637   | gastrulation brain homeobox 2                                                                                                    | GBX2   | Homo sapiens |
| 25801  | grancalcin, EF-hand calcium binding protein                                                                                      | GCA    | Homo sapiens |
| 23464  | glycine C-acetyltransferase (2-amino-3-ketobutyrate coenzyme A ligase)                                                           | GCAT   | Homo sapiens |
| 9648   | GRIP and coiled-coil domain containing 2                                                                                         | GCC2   | Homo sapiens |
| 2639   | glutaryl-Coenzyme A dehydrogenase                                                                                                | GCDH   | Homo sapiens |
| 2643   | GTP cyclohydrolase 1                                                                                                             | GCH1   | Homo sapiens |
| 2644   | GTP cyclohydrolase I feedback regulator                                                                                          | GCHFR  | Homo sapiens |
| 2646   | glucokinase (hexokinase 4) regulator                                                                                             | GCKR   | Homo sapiens |
| 2730   | glutamate-cysteine ligase, modifier subunit                                                                                      | GCLM   | Homo sapiens |
| 8521   | glial cells missing homolog 1 (Drosophila)                                                                                       | GCM1   | Homo sapiens |
| 10985  | GCN1 general control of amino-acid synthesis 1-like 1 (yeast)                                                                    | GCN1L1 | Homo sapiens |
| 2650   | glucosaminyl (N-acetyl) transferase 1, core 2 (beta-1,6-N-acetylglucosaminyltransferase)                                         | GCNT1  | Homo sapiens |
| 2651   | glucosaminyl (N-acetyl) transferase 2, I-branching enzyme (I blood group)                                                        | GCNT2  | Homo sapiens |
| 9615   | guanine deaminase                                                                                                                | GDA    | Homo sapiens |
| 2662   | growth differentiation factor 10                                                                                                 | GDF10  | Homo sapiens |
| 9518   | growth differentiation factor 15                                                                                                 | GDF15  | Homo sapiens |
| 8200   | growth differentiation factor 5                                                                                                  | GDF5   | Homo sapiens |
| 2664   | GDP dissociation inhibitor 1                                                                                                     | GDI1   | Homo sapiens |
| 54857  | glycerophosphodiester phosphodiesterase domain containing 2                                                                      | GDPD2  | Homo sapiens |
| 2669   | GTP binding protein overexpressed in skeletal muscle                                                                             | GEM    | Homo sapiens |

|       |                                                                                         |        |              |
|-------|-----------------------------------------------------------------------------------------|--------|--------------|
| 25929 | gem (nuclear organelle) associated protein 5                                            | GEMIN5 | Homo sapiens |
| 2670  | glial fibrillary acidic protein                                                         | GFAP   | Homo sapiens |
| 2671  | growth factor, augmenter of liver regeneration                                          | GFER   | Homo sapiens |
| 2672  | growth factor independent 1 transcription repressor                                     | GFI1   | Homo sapiens |
| 9945  | glutamine-fructose-6-phosphate transaminase 2                                           | GFPT2  | Homo sapiens |
| 2674  | GDNF family receptor alpha 1                                                            | GFRA1  | Homo sapiens |
| 2676  | GDNF family receptor alpha 3                                                            | GFRA3  | Homo sapiens |
| 23062 | golgi associated, gamma adaptin ear containing, ARF binding protein 2                   | GGA2   | Homo sapiens |
| 2677  | gamma-glutamyl carboxylase                                                              | GGCX   | Homo sapiens |
| 8836  | gamma-glutamyl hydrolase (conjugase, foylpolypolygammaglutamyl hydrolase)               | GGH    | Homo sapiens |
| 9453  | geranylgeranyl diphosphate synthase 1                                                   | GGPS1  | Homo sapiens |
| 27069 | growth hormone inducible transmembrane protein                                          | GHITM  | Homo sapiens |
| 2690  | growth hormone receptor                                                                 | GHR    | Homo sapiens |
| 2691  | growth hormone releasing hormone                                                        | GHRH   | Homo sapiens |
| 9815  | G protein-coupled receptor kinase interacting ArfGAP 2                                  | GIT2   | Homo sapiens |
| 2697  | gap junction protein, alpha 1, 43kDa                                                    | GJA1   | Homo sapiens |
| 2709  | gap junction protein, beta 5, 31.1kDa                                                   | GJB5   | Homo sapiens |
| 10804 | gap junction protein, beta 6, 30kDa                                                     | GJB6   | Homo sapiens |
| 2710  | glycerol kinase 3 pseudogene; glycerol kinase                                           | GK     | Homo sapiens |
| 2713  | glycerol kinase 3 pseudogene; glycerol kinase                                           | GK     | Homo sapiens |
| 2712  | glycerol kinase 2                                                                       | GK2    | Homo sapiens |
| 56287 | gastrokine 1                                                                            | GKN1   | Homo sapiens |
| 2717  | galactosidase, alpha                                                                    | GLA    | Homo sapiens |
| 2734  | golgi apparatus protein 1                                                               | GLG1   | Homo sapiens |
| 2737  | GLI family zinc finger 3                                                                | GLI3   | Homo sapiens |
| 11010 | GLI pathogenesis-related 1                                                              | GLIPR1 | Homo sapiens |
| 2739  | glyoxalase I                                                                            | GLO1   | Homo sapiens |
| 8001  | glycine receptor, alpha 3                                                               | GLRA3  | Homo sapiens |
| 2743  | glycine receptor, beta                                                                  | GLRB   | Homo sapiens |
| 2744  | glutaminase                                                                             | GLS    | Homo sapiens |
| 27165 | glutaminase 2 (liver, mitochondrial)                                                    | GLS2   | Homo sapiens |
| 2746  | glutamate dehydrogenase 1                                                               | GLUD1  | Homo sapiens |
| 2752  | glutamate-ammonia ligase (glutamine synthetase)                                         | GLUL   | Homo sapiens |
| 10249 | glycine-N-acyltransferase                                                               | GLYAT  | Homo sapiens |
| 2760  | GM2 ganglioside activator                                                               | GM2A   | Homo sapiens |
| 2762  | GDP-mannose 4,6-dehydratase                                                             | GMD5   | Homo sapiens |
| 2764  | glia maturation factor, beta                                                            | GMFB   | Homo sapiens |
| 51053 | geminin, DNA replication inhibitor                                                      | GMNN   | Homo sapiens |
| 8833  | guanine monphosphate synthetase                                                         | GMPS   | Homo sapiens |
| 2768  | guanine nucleotide binding protein (G protein) alpha 12                                 | GNA12  | Homo sapiens |
| 10672 | guanine nucleotide binding protein (G protein), alpha 13                                | GNA13  | Homo sapiens |
| 2770  | guanine nucleotide binding protein (G protein), alpha inhibiting activity polypeptide 1 | GNAI1  | Homo sapiens |
| 2771  | guanine nucleotide binding protein (G protein), alpha inhibiting activity polypeptide 2 | GNAI2  | Homo sapiens |



|       |                                                                                                       |        |              |
|-------|-------------------------------------------------------------------------------------------------------|--------|--------------|
| 2773  | guanine nucleotide binding protein (G protein), alpha inhibiting activity polypeptide 3               | GNAI3  | Homo sapiens |
| 2774  | guanine nucleotide binding protein (G protein), alpha activating activity polypeptide, olfactory type | GNAL   | Homo sapiens |
| 2775  | guanine nucleotide binding protein (G protein), alpha activating activity polypeptide O               | GNAO1  | Homo sapiens |
| 2776  | guanine nucleotide binding protein (G protein), q polypeptide                                         | GNAQ   | Homo sapiens |
| 2778  | GNAS complex locus                                                                                    | GNAS   | Homo sapiens |
| 2781  | guanine nucleotide binding protein (G protein), alpha z polypeptide                                   | GNAZ   | Homo sapiens |
| 2783  | guanine nucleotide binding protein (G protein), beta polypeptide 2                                    | GNB2   | Homo sapiens |
| 10681 | guanine nucleotide binding protein (G protein), beta 5                                                | GNB5   | Homo sapiens |
| 2791  | guanine nucleotide binding protein (G protein), gamma 11                                              | GNG11  | Homo sapiens |
| 2788  | guanine nucleotide binding protein (G protein), gamma 7                                               | GNG7   | Homo sapiens |
| 10578 | granulysin                                                                                            | GNLY   | Homo sapiens |
| 8443  | glyceronephosphate O-acyltransferase                                                                  | GNPAT  | Homo sapiens |
| 10007 | glucosamine-6-phosphate deaminase 1                                                                   | GNPDA1 | Homo sapiens |
| 2796  | gonadotropin-releasing hormone 1 (luteinizing-releasing hormone)                                      | GNRH1  | Homo sapiens |
| 2799  | glucosamine (N-acetyl)-6-sulfatase                                                                    | GNS    | Homo sapiens |
| 2800  | golgi autoantigen, golgin subfamily a, 1                                                              | GOLGA1 | Homo sapiens |
| 2801  | golgi autoantigen, golgin subfamily a, 2                                                              | GOLGA2 | Homo sapiens |
| 2802  | golgi autoantigen, golgin subfamily a, 3                                                              | GOLGA3 | Homo sapiens |
| 2804  | golgin B1, golgi integral membrane protein                                                            | GOLGB1 | Homo sapiens |
| 9527  | golgi SNAP receptor complex member 1                                                                  | GOSR1  | Homo sapiens |
| 9570  | golgi SNAP receptor complex member 2                                                                  | GOSR2  | Homo sapiens |
| 2805  | glutamic-oxaloacetic transaminase 1, soluble (aspartate aminotransferase 1)                           | GOT1   | Homo sapiens |
| 2806  | glutamic-oxaloacetic transaminase 2, mitochondrial (aspartate aminotransferase 2)                     | GOT2   | Homo sapiens |
| 2815  | glycoprotein IX (platelet)                                                                            | GP9    | Homo sapiens |
| 10223 | glycoprotein A33 (transmembrane)                                                                      | GPA33  | Homo sapiens |
| 8733  | glycosylphosphatidylinositol anchor attachment protein 1 homolog (yeast)                              | GPAA1  | Homo sapiens |
| 2719  | glypican 3                                                                                            | GPC3   | Homo sapiens |
| 2819  | glycerol-3-phosphate dehydrogenase 1 (soluble)                                                        | GPD1   | Homo sapiens |
| 2820  | glycerol-3-phosphate dehydrogenase 2 (mitochondrial)                                                  | GPD2   | Homo sapiens |
| 27238 | G patch domain and KOW motifs                                                                         | GPKOW  | Homo sapiens |
| 2823  | glycoprotein M6A                                                                                      | GPM6A  | Homo sapiens |
| 2824  | glycoprotein M6B                                                                                      | GPM6B  | Homo sapiens |
| 10457 | glycoprotein (transmembrane) nmb                                                                      | GPNMB  | Homo sapiens |
| 4935  | G protein-coupled receptor 143                                                                        | GPR143 | Homo sapiens |
| 23432 | G protein-coupled receptor 161                                                                        | GPR161 | Homo sapiens |
| 2842  | G protein-coupled receptor 19                                                                         | GPR19  | Homo sapiens |
| 2827  | G protein-coupled receptor 3                                                                          | GPR3   | Homo sapiens |
| 2859  | G protein-coupled receptor 35                                                                         | GPR35  | Homo sapiens |
| 2828  | G protein-coupled receptor 4                                                                          | GPR4   | Homo sapiens |
| 10149 | G protein-coupled receptor 64                                                                         | GPR64  | Homo sapiens |
| 8477  | G protein-coupled receptor 65                                                                         | GPR65  | Homo sapiens |

|       |                                                                         |        |              |
|-------|-------------------------------------------------------------------------|--------|--------------|
| 8111  | G protein-coupled receptor 68                                           | GPR68  | Homo sapiens |
| 51704 | G protein-coupled receptor, family C, group 5, member B                 | GPRC5B | Homo sapiens |
| 63940 | G-protein signaling modulator 3 (AGS3-like, <i>C. elegans</i> )         | GPSM3  | Homo sapiens |
| 2877  | glutathione peroxidase 2 (gastrointestinal)                             | GPX2   | Homo sapiens |
| 2878  | glutathione peroxidase 3 (plasma)                                       | GPX3   | Homo sapiens |
| 2879  | glutathione peroxidase 4 (phospholipid hydroperoxidase)                 | GPX4   | Homo sapiens |
| 9402  | GRB2-related adaptor protein 2                                          | GRAP2  | Homo sapiens |
| 2887  | growth factor receptor-bound protein 10                                 | GRB10  | Homo sapiens |
| 2888  | growth factor receptor-bound protein 14                                 | GRB14  | Homo sapiens |
| 2886  | growth factor receptor-bound protein 7                                  | GRB7   | Homo sapiens |
| 26585 | gremlin 1, cysteine knot superfamily, homolog ( <i>Xenopus laevis</i> ) | GREM1  | Homo sapiens |
| 9380  | glyoxylate reductase/hydroxypyruvate reductase                          | GRHPR  | Homo sapiens |
| 2891  | glutamate receptor, ionotropic, AMPA 2                                  | GRIA2  | Homo sapiens |
| 2897  | glutamate receptor, ionotropic, kainate 1                               | GRIK1  | Homo sapiens |
| 2899  | glutamate receptor, ionotropic, kainate 3                               | GRIK3  | Homo sapiens |
| 2902  | glutamate receptor, ionotropic, N-methyl D-aspartate 1                  | GRIN1  | Homo sapiens |
| 2905  | glutamate receptor, ionotropic, N-methyl D-aspartate 2C                 | GRIN2C | Homo sapiens |
| 2906  | glutamate receptor, ionotropic, N-methyl D-aspartate 2D                 | GRIN2D | Homo sapiens |
| 2868  | G protein-coupled receptor kinase 4                                     | GRK4   | Homo sapiens |
| 2870  | G protein-coupled receptor kinase 6                                     | GRK6   | Homo sapiens |
| 2913  | glutamate receptor, metabotropic 3                                      | GRM3   | Homo sapiens |
| 2896  | granulin                                                                | GRN    | Homo sapiens |
| 2922  | gastrin-releasing peptide                                               | GRP    | Homo sapiens |
| 2926  | G-rich RNA sequence binding factor 1                                    | GRSF1  | Homo sapiens |
| 2932  | glycogen synthase kinase 3 beta                                         | GSK3B  | Homo sapiens |
| 2935  | G1 to S phase transition 1                                              | GSPT1  | Homo sapiens |
| 2936  | glutathione reductase                                                   | GSR    | Homo sapiens |
| 2937  | glutathione synthetase                                                  | GSS    | Homo sapiens |
| 2941  | glutathione S-transferase alpha 4                                       | GSTA4  | Homo sapiens |
| 2947  | glutathione S-transferase mu 3 (brain)                                  | GSTM3  | Homo sapiens |
| 2948  | glutathione S-transferase mu 4                                          | GSTM4  | Homo sapiens |
| 2949  | glutathione S-transferase mu 5                                          | GSTM5  | Homo sapiens |
| 9446  | glutathione S-transferase omega 1                                       | GSTO1  | Homo sapiens |
| 2950  | glutathione S-transferase pi 1                                          | GSTP1  | Homo sapiens |
| 2952  | glutathione S-transferase theta 1                                       | GSTT1  | Homo sapiens |
| 2954  | glutathione transferase zeta 1                                          | GSTZ1  | Homo sapiens |
| 2957  | general transcription factor IIA, 1, 19/37kDa                           | GTF2A1 | Homo sapiens |
| 2958  | general transcription factor IIA, 2, 12kDa                              | GTF2A2 | Homo sapiens |
| 2959  | general transcription factor IIB                                        | GTF2B  | Homo sapiens |
| 2960  | general transcription factor IIE, polypeptide 1, alpha 56kDa            | GTF2E1 | Homo sapiens |
| 2961  | general transcription factor IIE, polypeptide 2, beta 34kDa             | GTF2E2 | Homo sapiens |
| 2962  | general transcription factor IIF, polypeptide 1, 74kDa                  | GTF2F1 | Homo sapiens |
| 2965  | general transcription factor IIH, polypeptide 1, 62kDa                  | GTF2H1 | Homo sapiens |
| 2968  | general transcription factor IIH, polypeptide 4, 52kDa                  | GTF2H4 | Homo sapiens |
| 9567  | GTP binding protein 1                                                   | GTPBP1 | Homo sapiens |
| 23560 | GTP binding protein 4                                                   | GTPBP4 | Homo sapiens |

|       |                                                                                                                                       |         |              |
|-------|---------------------------------------------------------------------------------------------------------------------------------------|---------|--------------|
| 51512 | G-2 and S-phase expressed 1                                                                                                           | GTSE1   | Homo sapiens |
| 2978  | guanylate cyclase activator 1A (retina)                                                                                               | GUCA1A  | Homo sapiens |
| 2981  | guanylate cyclase activator 2B (uroguanylin)                                                                                          | GUCA2B  | Homo sapiens |
| 2983  | guanylate cyclase 1, soluble, beta 3                                                                                                  | GUCY1B3 | Homo sapiens |
| 2984  | guanylate cyclase 2C (heat stable enterotoxin receptor)                                                                               | GUCY2C  | Homo sapiens |
| 2987  | guanylate kinase 1                                                                                                                    | GUK1    | Homo sapiens |
| 2990  | glucuronidase, beta                                                                                                                   | GUSB    | Homo sapiens |
| 8908  | glycogenin 2                                                                                                                          | GYG2    | Homo sapiens |
| 2997  | glycogen synthase 1 (muscle)                                                                                                          | GYS1    | Homo sapiens |
| 2998  | glycogen synthase 2 (liver)                                                                                                           | GYS2    | Homo sapiens |
| 3001  | granzyme A (granzyme 1, cytotoxic T-lymphocyte-associated serine esterase 3)                                                          | GZMA    | Homo sapiens |
| 3002  | granzyme B (granzyme 2, cytotoxic T-lymphocyte-associated serine esterase 1)                                                          | GZMB    | Homo sapiens |
| 2999  | granzyme H (cathepsin G-like 2, protein h-CCPX)                                                                                       | GZMH    | Homo sapiens |
| 3003  | granzyme K (granzyme 3; tryptase II)                                                                                                  | GZMK    | Homo sapiens |
| 3004  | granzyme M (lymphocyte met-ase 1)                                                                                                     | GZMM    | Homo sapiens |
| 3005  | H1 histone family, member 0                                                                                                           | H1F0    | Homo sapiens |
| 9555  | H2A histone family, member Y                                                                                                          | H2AFY   | Homo sapiens |
| 3015  | H2A histone family, member Z                                                                                                          | H2AFZ   | Homo sapiens |
| 23498 | 3-hydroxyanthranilate 3,4-dioxygenase                                                                                                 | HAAO    | Homo sapiens |
| 22927 | hyaluronan binding protein 4                                                                                                          | HABP4   | Homo sapiens |
| 3030  | hydroxyacyl-Coenzyme A dehydrogenase/3-ketoacyl-Coenzyme A thiolase/enoyl-Coenzyme A hydratase (trifunctional protein), alpha subunit | HADHA   | Homo sapiens |
| 3029  | hydroxyacylglutathione hydrolase                                                                                                      | HAGH    | Homo sapiens |
| 3034  | histidine ammonia-lyase                                                                                                               | HAL     | Homo sapiens |
| 54363 | hydroxyacid oxidase (glycolate oxidase) 1                                                                                             | HAO1    | Homo sapiens |
| 51179 | hydroxyacid oxidase 2 (long chain)                                                                                                    | HAO2    | Homo sapiens |
| 8520  | histone acetyltransferase 1                                                                                                           | HAT1    | Homo sapiens |
| 3043  | hemoglobin, beta                                                                                                                      | HBB     | Homo sapiens |
| 10767 | HBS1-like ( <i>S. cerevisiae</i> )                                                                                                    | HBS1L   | Homo sapiens |
| 10542 | hepatitis B virus x interacting protein                                                                                               | HBXIP   | Homo sapiens |
| 3052  | holocytochrome c synthase (cytochrome c heme-lyase)                                                                                   | HCCS    | Homo sapiens |
| 3054  | host cell factor C1 (VP16-accessory protein)                                                                                          | HCFC1   | Homo sapiens |
| 3055  | hemopoietic cell kinase                                                                                                               | HCK     | Homo sapiens |
| 3059  | hematopoietic cell-specific Lyn substrate 1                                                                                           | HCLS1   | Homo sapiens |
| 610   | hyperpolarization activated cyclic nucleotide-gated potassium channel 2                                                               | HCN2    | Homo sapiens |
| 3060  | hypocretin (orexin) neuropeptide precursor                                                                                            | HCRT    | Homo sapiens |
| 3061  | hypocretin (orexin) receptor 1                                                                                                        | HCRTR1  | Homo sapiens |
| 3062  | hypocretin (orexin) receptor 2                                                                                                        | HCRTR2  | Homo sapiens |
| 3065  | histone deacetylase 1                                                                                                                 | HDAC1   | Homo sapiens |
| 3066  | histone deacetylase 2                                                                                                                 | HDAC2   | Homo sapiens |
| 8841  | histone deacetylase 3                                                                                                                 | HDAC3   | Homo sapiens |
| 9759  | histone deacetylase 4                                                                                                                 | HDAC4   | Homo sapiens |
| 10014 | histone deacetylase 5                                                                                                                 | HDAC5   | Homo sapiens |

|           |                                                                                                 |          |              |
|-----------|-------------------------------------------------------------------------------------------------|----------|--------------|
| 10013     | histone deacetylase 6                                                                           | HDAC6    | Homo sapiens |
| 8226      | haloacid dehalogenase-like hydrolase domain containing 1A                                       | HDHD1A   | Homo sapiens |
| 3069      | high density lipoprotein binding protein                                                        | HDLBP    | Homo sapiens |
| 3070      | helicase, lymphoid-specific                                                                     | HELLS    | Homo sapiens |
| 3280      | hairy and enhancer of split 1, ( <i>Drosophila</i> )                                            | HES1     | Homo sapiens |
| 8820      | HESX homeobox 1                                                                                 | HESX1    | Homo sapiens |
| 3073      | hexosaminidase A (alpha polypeptide)                                                            | HEXA     | Homo sapiens |
| 3074      | hexosaminidase B (beta polypeptide)                                                             | HEXB     | Homo sapiens |
| 23462     | hairy/enhancer-of-split related with YRPW motif 1                                               | HEY1     | Homo sapiens |
| 3077      | hemochromatosis                                                                                 | HFE      | Homo sapiens |
| 9146      | hepatocyte growth factor-regulated tyrosine kinase substrate                                    | HGS      | Homo sapiens |
| 3087      | hematopoietically expressed homeobox                                                            | HHEX     | Homo sapiens |
| 26275     | 3-hydroxyisobutyryl-Coenzyme A hydrolase                                                        | HIBCH    | Homo sapiens |
| 3090      | hypermethylated in cancer 1                                                                     | HIC1     | Homo sapiens |
| 3091      | hypoxia inducible factor 1, alpha subunit (basic helix-loop-helix transcription factor)         | HIF1A    | Homo sapiens |
| 3092      | huntingtin interacting protein 1                                                                | HIP1     | Homo sapiens |
| 28996     | homeodomain interacting protein kinase 2; similar to homeodomain interacting protein kinase 2   | HIPK2    | Homo sapiens |
| 653052    | homeodomain interacting protein kinase 2; similar to homeodomain interacting protein kinase 2   | HIPK2    | Homo sapiens |
| 10114     | homeodomain interacting protein kinase 3                                                        | HIPK3    | Homo sapiens |
| 7290      | HIR histone cell cycle regulation defective homolog A ( <i>S. cerevisiae</i> )                  | HIRA     | Homo sapiens |
| 8479      | HIRA interacting protein 3                                                                      | HIRIP3   | Homo sapiens |
| 3024      | histone cluster 1, H1a                                                                          | HIST1H1A | Homo sapiens |
| 3006      | histone cluster 1, H1c                                                                          | HIST1H1C | Homo sapiens |
| 3096      | human immunodeficiency virus type I enhancer binding protein 1                                  | HIVEP1   | Homo sapiens |
| 3097      | human immunodeficiency virus type I enhancer binding protein 2                                  | HIVEP2   | Homo sapiens |
| 3098      | hexokinase 1                                                                                    | HK1      | Homo sapiens |
| 642546    | hexokinase 2 pseudogene; hexokinase 2                                                           | HK2      | Homo sapiens |
| 3099      | hexokinase 2 pseudogene; hexokinase 2                                                           | HK2      | Homo sapiens |
| 3111      | major histocompatibility complex, class II, DO alpha                                            | HLA-DOA  | Homo sapiens |
| 3112      | major histocompatibility complex, class II, DO beta                                             | HLA-DOB  | Homo sapiens |
| 3113      | major histocompatibility complex, class II, DP alpha 1                                          | HLA-DPA1 | Homo sapiens |
| 3115      | major histocompatibility complex, class II, DP beta 1                                           | HLA-DPB1 | Homo sapiens |
| 3135      | major histocompatibility complex, class I, G                                                    | HLA-G    | Homo sapiens |
| 3141      | holocarboxylase synthetase (biotin-(propionyl-Coenzyme A-carboxylase (ATP-hydrolysing)) ligase) | HLCS     | Homo sapiens |
| 3131      | hepatic leukemia factor                                                                         | HLF      | Homo sapiens |
| 10362     | high-mobility group 20B                                                                         | HMG20B   | Homo sapiens |
| 100130009 | hypothetical LOC100130009; high mobility group AT-hook 1                                        | HMGA1    | Homo sapiens |
| 3159      | hypothetical LOC100130009; high mobility group AT-hook 1                                        | HMGA1    | Homo sapiens |
| 100130561 | high-mobility group box 1; high-mobility group box 1-like 10                                    | HMGB1    | Homo sapiens |
| 3146      | high-mobility group box 1; high-mobility group box 1-like 10                                    | HMGB1    | Homo sapiens |
| 3148      | high-mobility group box 2                                                                       | HMGB2    | Homo sapiens |
| 729595    | similar to high mobility group box 3; high-mobility group box 3                                 | HMGB3    | Homo sapiens |
| 646993    | similar to high mobility group box 3; high-mobility group box 3                                 | HMGB3    | Homo sapiens |

|        |                                                                              |         |              |
|--------|------------------------------------------------------------------------------|---------|--------------|
| 3149   | similar to high mobility group box 3; high-mobility group box 3              | HMGB3   | Homo sapiens |
| 729952 | similar to high mobility group box 3; high-mobility group box 3              | HMGB3   | Homo sapiens |
| 3155   | 3-hydroxymethyl-3-methylglutaryl-Coenzyme A lyase                            | HMGCL   | Homo sapiens |
| 3156   | 3-hydroxy-3-methylglutaryl-Coenzyme A reductase                              | HMGCR   | Homo sapiens |
| 3158   | 3-hydroxy-3-methylglutaryl-Coenzyme A synthase 2 (mitochondrial)             | HMGCS2  | Homo sapiens |
| 10473  | high mobility group nucleosomal binding domain 4                             | HMGN4   | Homo sapiens |
| 3162   | heme oxygenase (decycling) 1                                                 | HMOX1   | Homo sapiens |
| 3163   | heme oxygenase (decycling) 2                                                 | HMOX2   | Homo sapiens |
| 3174   | hepatocyte nuclear factor 4, gamma                                           | HNF4G   | Homo sapiens |
| 3176   | histamine N-methyltransferase                                                | HNMT    | Homo sapiens |
| 9456   | homer homolog 1 (Drosophila)                                                 | HOMER1  | Homo sapiens |
| 9455   | homer homolog 2 (Drosophila)                                                 | HOMER2  | Homo sapiens |
| 9454   | homer homolog 3 (Drosophila)                                                 | HOMER3  | Homo sapiens |
| 3198   | homeobox A1                                                                  | HOXA1   | Homo sapiens |
| 3199   | homeobox A2                                                                  | HOXA2   | Homo sapiens |
| 3200   | homeobox A3                                                                  | HOXA3   | Homo sapiens |
| 3202   | homeobox A5                                                                  | HOXA5   | Homo sapiens |
| 3205   | homeobox A9                                                                  | HOXA9   | Homo sapiens |
| 3212   | homeobox B2                                                                  | HOXB2   | Homo sapiens |
| 3215   | homeobox B5                                                                  | HOXB5   | Homo sapiens |
| 3217   | homeobox B7                                                                  | HOXB7   | Homo sapiens |
| 3226   | homeobox C10                                                                 | HOXC10  | Homo sapiens |
| 3235   | homeobox D9                                                                  | HOXD9   | Homo sapiens |
| 3242   | 4-hydroxyphenylpyruvate dioxygenase                                          | HPD     | Homo sapiens |
| 3248   | hydroxyprostaglandin dehydrogenase 15-(NAD)                                  | HPGD    | Homo sapiens |
| 3249   | hepsin                                                                       | HPN     | Homo sapiens |
| 3251   | hypoxanthine phosphoribosyltransferase 1                                     | HPRT1   | Homo sapiens |
| 3257   | Hermansky-Pudlak syndrome 1                                                  | HPS1    | Homo sapiens |
| 11234  | Hermansky-Pudlak syndrome 5                                                  | HPS5    | Homo sapiens |
| 3263   | hemopexin                                                                    | HPX     | Homo sapiens |
| 3265   | v-Ha-ras Harvey rat sarcoma viral oncogene homolog                           | HRAS    | Homo sapiens |
| 3273   | histidine-rich glycoprotein                                                  | HRG     | Homo sapiens |
| 3269   | histamine receptor H1                                                        | HRH1    | Homo sapiens |
| 8739   | harakiri, BCL2 interacting protein (contains only BH3 domain)                | HRK     | Homo sapiens |
| 10247  | heat-responsive protein 12                                                   | HRSP12  | Homo sapiens |
| 9653   | heparan sulfate 2-O-sulfotransferase 1                                       | HS2ST1  | Homo sapiens |
| 9957   | heparan sulfate (glucosamine) 3-O-sulfotransferase 1                         | HS3ST1  | Homo sapiens |
| 3290   | hydroxysteroid (11-beta) dehydrogenase 1                                     | HSD11B1 | Homo sapiens |
| 3292   | hydroxysteroid (17-beta) dehydrogenase 1                                     | HSD17B1 | Homo sapiens |
| 3294   | hydroxysteroid (17-beta) dehydrogenase 2                                     | HSD17B2 | Homo sapiens |
| 3293   | hydroxysteroid (17-beta) dehydrogenase 3                                     | HSD17B3 | Homo sapiens |
| 7923   | hydroxysteroid (17-beta) dehydrogenase 8                                     | HSD17B8 | Homo sapiens |
| 3283   | hydroxy-delta-5-steroid dehydrogenase, 3 beta- and steroid delta-isomerase 1 | HSD3B1  | Homo sapiens |
| 3298   | heat shock transcription factor 2                                            | HSF2    | Homo sapiens |
| 11077  | heat shock transcription factor 2 binding protein                            | HSF2BP  | Homo sapiens |

|        |                                                                                                                                                                                                                                                                 |         |              |
|--------|-----------------------------------------------------------------------------------------------------------------------------------------------------------------------------------------------------------------------------------------------------------------|---------|--------------|
| 3305   | heat shock 70kDa protein 1-like                                                                                                                                                                                                                                 | HSPA1L  | Homo sapiens |
| 3308   | heat shock 70kDa protein 4                                                                                                                                                                                                                                      | HSPA4   | Homo sapiens |
| 400750 | hypothetical gene supported by AF216292; NM_005347; heat shock 70kDa protein 5 (glucose-regulated protein, 78kDa)                                                                                                                                               | HSPA5   | Homo sapiens |
| 3309   | hypothetical gene supported by AF216292; NM_005347; heat shock 70kDa protein 5 (glucose-regulated protein, 78kDa)                                                                                                                                               | HSPA5   | Homo sapiens |
| 653553 | heat shock 27kDa protein-like 2 pseudogene; heat shock 27kDa protein 1                                                                                                                                                                                          | HSPB1   | Homo sapiens |
| 3315   | heat shock 27kDa protein-like 2 pseudogene; heat shock 27kDa protein 1                                                                                                                                                                                          | HSPB1   | Homo sapiens |
| 8988   | heat shock 27kDa protein 3                                                                                                                                                                                                                                      | HSPB3   | Homo sapiens |
| 644745 | heat shock 60kDa protein 1 (chaperonin) pseudogene 5; heat shock 60kDa protein 1 (chaperonin) pseudogene 6; heat shock 60kDa protein 1 (chaperonin) pseudogene 1; heat shock 60kDa protein 1 (chaperonin) pseudogene 4; heat shock 60kDa protein 1 (chaperonin) | HSPD1   | Homo sapiens |
| 345041 | heat shock 60kDa protein 1 (chaperonin) pseudogene 5; heat shock 60kDa protein 1 (chaperonin) pseudogene 6; heat shock 60kDa protein 1 (chaperonin) pseudogene 1; heat shock 60kDa protein 1 (chaperonin) pseudogene 4; heat shock 60kDa protein 1 (chaperonin) | HSPD1   | Homo sapiens |
| 645548 | heat shock 60kDa protein 1 (chaperonin) pseudogene 5; heat shock 60kDa protein 1 (chaperonin) pseudogene 6; heat shock 60kDa protein 1 (chaperonin) pseudogene 1; heat shock 60kDa protein 1 (chaperonin) pseudogene 4; heat shock 60kDa protein 1 (chaperonin) | HSPD1   | Homo sapiens |
| 643300 | heat shock 60kDa protein 1 (chaperonin) pseudogene 5; heat shock 60kDa protein 1 (chaperonin) pseudogene 6; heat shock 60kDa protein 1 (chaperonin) pseudogene 1; heat shock 60kDa protein 1 (chaperonin) pseudogene 4; heat shock 60kDa protein 1 (chaperonin) | HSPD1   | Homo sapiens |
| 3329   | heat shock 60kDa protein 1 (chaperonin) pseudogene 5; heat shock 60kDa protein 1 (chaperonin) pseudogene 6; heat shock 60kDa protein 1 (chaperonin) pseudogene 1; heat shock 60kDa protein 1 (chaperonin) pseudogene 4; heat shock 60kDa protein 1 (chaperonin) | HSPD1   | Homo sapiens |
| 3339   | heparan sulfate proteoglycan 2                                                                                                                                                                                                                                  | HSPG2   | Homo sapiens |
| 10553  | HIV-1 Tat interactive protein 2, 30kDa                                                                                                                                                                                                                          | HTATIP2 | Homo sapiens |
| 3356   | 5-hydroxytryptamine (serotonin) receptor 2A                                                                                                                                                                                                                     | HTR2A   | Homo sapiens |
| 3357   | 5-hydroxytryptamine (serotonin) receptor 2B                                                                                                                                                                                                                     | HTR2B   | Homo sapiens |
| 3358   | 5-hydroxytryptamine (serotonin) receptor 2C                                                                                                                                                                                                                     | HTR2C   | Homo sapiens |
| 3359   | 5-hydroxytryptamine (serotonin) receptor 3A                                                                                                                                                                                                                     | HTR3A   | Homo sapiens |
| 3362   | 5-hydroxytryptamine (serotonin) receptor 6                                                                                                                                                                                                                      | HTR6    | Homo sapiens |
| 3364   | HUS1 checkpoint homolog (S. pombe)                                                                                                                                                                                                                              | HUS1    | Homo sapiens |
| 3373   | hyaluronoglucosaminidase 1                                                                                                                                                                                                                                      | HYAL1   | Homo sapiens |
| 8692   | hyaluronoglucosaminidase 2                                                                                                                                                                                                                                      | HYAL2   | Homo sapiens |
| 10525  | hypoxia up-regulated 1                                                                                                                                                                                                                                          | HYOU1   | Homo sapiens |
| 3376   | isoleucyl-tRNA synthetase                                                                                                                                                                                                                                       | IARS    | Homo sapiens |
| 25998  | inhibitor of Bruton agammaglobulinemia tyrosine kinase                                                                                                                                                                                                          | IBTK    | Homo sapiens |
| 3382   | islet cell autoantigen 1, 69kDa                                                                                                                                                                                                                                 | ICA1    | Homo sapiens |
| 3385   | intercellular adhesion molecule 3                                                                                                                                                                                                                               | ICAM3   | Homo sapiens |
| 7087   | intercellular adhesion molecule 5, telencephalin                                                                                                                                                                                                                | ICAM5   | Homo sapiens |
| 23463  | isoprenylcysteine carboxyl methyltransferase                                                                                                                                                                                                                    | ICMT    | Homo sapiens |
| 29851  | inducible T-cell co-stimulator                                                                                                                                                                                                                                  | ICOS    | Homo sapiens |

|        |                                                                                                                                                                                                                                                                                                   |        |              |
|--------|---------------------------------------------------------------------------------------------------------------------------------------------------------------------------------------------------------------------------------------------------------------------------------------------------|--------|--------------|
| 3397   | inhibitor of DNA binding 1, dominant negative helix-loop-helix protein                                                                                                                                                                                                                            | ID1    | Homo sapiens |
| 3399   | inhibitor of DNA binding 3, dominant negative helix-loop-helix protein                                                                                                                                                                                                                            | ID3    | Homo sapiens |
| 3400   | inhibitor of DNA binding 4, dominant negative helix-loop-helix protein                                                                                                                                                                                                                            | ID4    | Homo sapiens |
| 3416   | insulin-degrading enzyme                                                                                                                                                                                                                                                                          | IDE    | Homo sapiens |
| 3417   | isocitrate dehydrogenase 1 (NADP+), soluble                                                                                                                                                                                                                                                       | IDH1   | Homo sapiens |
| 3418   | isocitrate dehydrogenase 2 (NADP+), mitochondrial                                                                                                                                                                                                                                                 | IDH2   | Homo sapiens |
| 3419   | isocitrate dehydrogenase 3 (NAD+) alpha                                                                                                                                                                                                                                                           | IDH3A  | Homo sapiens |
| 3421   | isocitrate dehydrogenase 3 (NAD+) gamma                                                                                                                                                                                                                                                           | IDH3G  | Homo sapiens |
| 3423   | iduronate 2-sulfatase                                                                                                                                                                                                                                                                             | IDS    | Homo sapiens |
| 3425   | iduronidase, alpha-L-                                                                                                                                                                                                                                                                             | IDUA   | Homo sapiens |
| 8870   | immediate early response 3                                                                                                                                                                                                                                                                        | IER3   | Homo sapiens |
| 10437  | interferon, gamma-inducible protein 30                                                                                                                                                                                                                                                            | IFI30  | Homo sapiens |
| 64135  | interferon induced with helicase C domain 1                                                                                                                                                                                                                                                       | IFIH1  | Homo sapiens |
| 24138  | interferon-induced protein with tetratricopeptide repeats 5                                                                                                                                                                                                                                       | IFIT5  | Homo sapiens |
| 8519   | interferon induced transmembrane protein 1 (9-27)                                                                                                                                                                                                                                                 | IFITM1 | Homo sapiens |
| 3454   | interferon (alpha, beta and omega) receptor 1                                                                                                                                                                                                                                                     | IFNAR1 | Homo sapiens |
| 3458   | interferon, gamma                                                                                                                                                                                                                                                                                 | IFNG   | Homo sapiens |
| 3459   | interferon gamma receptor 1                                                                                                                                                                                                                                                                       | IFNGR1 | Homo sapiens |
| 3460   | interferon gamma receptor 2 (interferon gamma transducer 1)                                                                                                                                                                                                                                       | IFNGR2 | Homo sapiens |
| 3475   | interferon-related developmental regulator 1                                                                                                                                                                                                                                                      | IFRD1  | Homo sapiens |
| 7866   | interferon-related developmental regulator 2                                                                                                                                                                                                                                                      | IFRD2  | Homo sapiens |
| 280655 | chromosome 14 open reading frame 19; immunoglobulin (CD79A) binding protein 1                                                                                                                                                                                                                     | IGBP1  | Homo sapiens |
| 3476   | chromosome 14 open reading frame 19; immunoglobulin (CD79A) binding protein 1                                                                                                                                                                                                                     | IGBP1  | Homo sapiens |
| 3479   | insulin-like growth factor 1 (somatomedin C)                                                                                                                                                                                                                                                      | IGF1   | Homo sapiens |
| 3482   | insulin-like growth factor 2 receptor                                                                                                                                                                                                                                                             | IGF2R  | Homo sapiens |
| 3484   | insulin-like growth factor binding protein 1                                                                                                                                                                                                                                                      | IGFBP1 | Homo sapiens |
| 3486   | insulin-like growth factor binding protein 3                                                                                                                                                                                                                                                      | IGFBP3 | Homo sapiens |
| 3488   | insulin-like growth factor binding protein 5                                                                                                                                                                                                                                                      | IGFBP5 | Homo sapiens |
| 3489   | insulin-like growth factor binding protein 6                                                                                                                                                                                                                                                      | IGFBP6 | Homo sapiens |
| 3490   | insulin-like growth factor binding protein 7                                                                                                                                                                                                                                                      | IGFBP7 | Homo sapiens |
| 3500   | immunoglobulin heavy constant gamma 1 (G1m marker); immunoglobulin heavy constant mu; immunoglobulin heavy variable 3-7; immunoglobulin heavy constant gamma 3 (G3m marker); immunoglobulin heavy variable 3-11 (gene/pseudogene); immunoglobulin heavy variable 4-31; immunoglobulin heavy locus | IGHM   | Homo sapiens |
| 3492   | immunoglobulin heavy constant gamma 1 (G1m marker); immunoglobulin heavy constant mu; immunoglobulin heavy variable 3-7; immunoglobulin heavy constant gamma 3 (G3m marker); immunoglobulin heavy variable 3-11 (gene/pseudogene); immunoglobulin heavy variable 4-31; immunoglobulin heavy locus | IGHM   | Homo sapiens |
| 28396  | immunoglobulin heavy constant gamma 1 (G1m marker); immunoglobulin heavy constant mu; immunoglobulin heavy variable 3-7; immunoglobulin heavy constant gamma 3 (G3m marker); immunoglobulin heavy variable 3-11 (gene/pseudogene);                                                                | IGHM   | Homo sapiens |

|        |                                                                                                                                                                                                                                                                                                            |         |              |
|--------|------------------------------------------------------------------------------------------------------------------------------------------------------------------------------------------------------------------------------------------------------------------------------------------------------------|---------|--------------|
|        | immunoglobulin heavy variable 4-31; immunoglobulin heavy locus                                                                                                                                                                                                                                             |         |              |
| 3502   | immunoglobulin heavy constant gamma 1 (G1m marker);<br>immunoglobulin heavy constant mu; immunoglobulin heavy variable 3-7; immunoglobulin heavy constant gamma 3 (G3m marker);<br>immunoglobulin heavy variable 3-11 (gene/pseudogene);<br>immunoglobulin heavy variable 4-31; immunoglobulin heavy locus | IGHM    | Homo sapiens |
| 3507   | immunoglobulin heavy constant gamma 1 (G1m marker);<br>immunoglobulin heavy constant mu; immunoglobulin heavy variable 3-7; immunoglobulin heavy constant gamma 3 (G3m marker);<br>immunoglobulin heavy variable 3-11 (gene/pseudogene);<br>immunoglobulin heavy variable 4-31; immunoglobulin heavy locus | IGHM    | Homo sapiens |
| 28450  | immunoglobulin heavy constant gamma 1 (G1m marker);<br>immunoglobulin heavy constant mu; immunoglobulin heavy variable 3-7; immunoglobulin heavy constant gamma 3 (G3m marker);<br>immunoglobulin heavy variable 3-11 (gene/pseudogene);<br>immunoglobulin heavy variable 4-31; immunoglobulin heavy locus | IGHM    | Homo sapiens |
| 28452  | immunoglobulin heavy constant gamma 1 (G1m marker);<br>immunoglobulin heavy constant mu; immunoglobulin heavy variable 3-7; immunoglobulin heavy constant gamma 3 (G3m marker);<br>immunoglobulin heavy variable 3-11 (gene/pseudogene);<br>immunoglobulin heavy variable 4-31; immunoglobulin heavy locus | IGHM    | Homo sapiens |
| 3508   | immunoglobulin mu binding protein 2                                                                                                                                                                                                                                                                        | IGHMBP2 | Homo sapiens |
| 3543   | immunoglobulin lambda-like polypeptide 1                                                                                                                                                                                                                                                                   | IGLL1   | Homo sapiens |
| 3321   | immunoglobulin superfamily, member 3                                                                                                                                                                                                                                                                       | IGSF3   | Homo sapiens |
| 644456 | similar to CG18005; IK cytokine, down-regulator of HLA II                                                                                                                                                                                                                                                  | IK      | Homo sapiens |
| 3550   | similar to CG18005; IK cytokine, down-regulator of HLA II                                                                                                                                                                                                                                                  | IK      | Homo sapiens |
| 8518   | inhibitor of kappa light polypeptide gene enhancer in B-cells, kinase complex-associated protein                                                                                                                                                                                                           | IKBKAP  | Homo sapiens |
| 3551   | inhibitor of kappa light polypeptide gene enhancer in B-cells, kinase beta                                                                                                                                                                                                                                 | IKBKB   | Homo sapiens |
| 3588   | interleukin 10 receptor, beta                                                                                                                                                                                                                                                                              | IL10RB  | Homo sapiens |
| 3589   | interleukin 11                                                                                                                                                                                                                                                                                             | IL11    | Homo sapiens |
| 3590   | interleukin 11 receptor, alpha                                                                                                                                                                                                                                                                             | IL11RA  | Homo sapiens |
| 3592   | interleukin 12A (natural killer cell stimulatory factor 1, cytotoxic lymphocyte maturation factor 1, p35)                                                                                                                                                                                                  | IL12A   | Homo sapiens |
| 3595   | interleukin 12 receptor, beta 2                                                                                                                                                                                                                                                                            | IL12RB2 | Homo sapiens |
| 3596   | interleukin 13                                                                                                                                                                                                                                                                                             | IL13    | Homo sapiens |
| 3598   | interleukin 13 receptor, alpha 2                                                                                                                                                                                                                                                                           | IL13RA2 | Homo sapiens |
| 3600   | interleukin 15                                                                                                                                                                                                                                                                                             | IL15    | Homo sapiens |
| 3601   | interleukin 15 receptor, alpha                                                                                                                                                                                                                                                                             | IL15RA  | Homo sapiens |
| 3603   | interleukin 16 (lymphocyte chemoattractant factor)                                                                                                                                                                                                                                                         | IL16    | Homo sapiens |
| 3606   | interleukin 18 (interferon-gamma-inducing factor)                                                                                                                                                                                                                                                          | IL18    | Homo sapiens |
| 8809   | interleukin 18 receptor 1                                                                                                                                                                                                                                                                                  | IL18R1  | Homo sapiens |
| 8807   | interleukin 18 receptor accessory protein                                                                                                                                                                                                                                                                  | IL18RAP | Homo sapiens |
| 29949  | interleukin 19                                                                                                                                                                                                                                                                                             | IL19    | Homo sapiens |
| 3553   | interleukin 1, beta                                                                                                                                                                                                                                                                                        | IL1B    | Homo sapiens |
| 3554   | interleukin 1 receptor, type I                                                                                                                                                                                                                                                                             | IL1R1   | Homo sapiens |
| 7850   | interleukin 1 receptor, type II                                                                                                                                                                                                                                                                            | IL1R2   | Homo sapiens |
| 3556   | interleukin 1 receptor accessory protein                                                                                                                                                                                                                                                                   | IL1RAP  | Homo sapiens |



|        |                                                                  |        |              |
|--------|------------------------------------------------------------------|--------|--------------|
| 9173   | interleukin 1 receptor-like 1                                    | IL1RL1 | Homo sapiens |
| 3557   | interleukin 1 receptor antagonist                                | IL1RN  | Homo sapiens |
| 51561  | interleukin 23, alpha subunit p19                                | IL23A  | Homo sapiens |
| 9466   | interleukin 27 receptor, alpha                                   | IL27RA | Homo sapiens |
| 3559   | interleukin 2 receptor, alpha                                    | IL2RA  | Homo sapiens |
| 3560   | interleukin 2 receptor, beta                                     | IL2RB  | Homo sapiens |
| 3561   | interleukin 2 receptor, gamma (severe combined immunodeficiency) | IL2RG  | Homo sapiens |
| 133396 | interleukin 31 receptor A                                        | IL31RA | Homo sapiens |
| 3566   | interleukin 4 receptor                                           | IL4R   | Homo sapiens |
| 3569   | interleukin 6 (interferon, beta 2)                               | IL6    | Homo sapiens |
| 3570   | interleukin 6 receptor                                           | IL6R   | Homo sapiens |
| 3572   | interleukin 6 signal transducer (gp130, oncostatin M receptor)   | IL6ST  | Homo sapiens |
| 3574   | interleukin 7                                                    | IL7    | Homo sapiens |
| 3575   | interleukin 7 receptor                                           | IL7R   | Homo sapiens |
| 3608   | interleukin enhancer binding factor 2, 45kDa                     | ILF2   | Homo sapiens |
| 10994  | ilvB (bacterial acetolactate synthase)-like                      | ILVBL  | Homo sapiens |
| 10989  | inner membrane protein, mitochondrial (mitofilin)                | IMMT   | Homo sapiens |
| 3612   | inositol(myo)-1(or 4)-monophosphatase 1                          | IMPA1  | Homo sapiens |
| 3613   | inositol(myo)-1(or 4)-monophosphatase 2                          | IMPA2  | Homo sapiens |
| 3614   | IMP (inosine monophosphate) dehydrogenase 1                      | IMPDH1 | Homo sapiens |
| 3615   | IMP (inosine monophosphate) dehydrogenase 2                      | IMPDH2 | Homo sapiens |
| 9118   | internexin neuronal intermediate filament protein, alpha         | INA    | Homo sapiens |
| 54556  | inhibitor of growth family, member 3                             | ING3   | Homo sapiens |
| 51147  | inhibitor of growth family, member 4                             | ING4   | Homo sapiens |
| 84289  | inhibitor of growth family, member 5                             | ING5   | Homo sapiens |
| 3625   | inhibin, beta B                                                  | INHBB  | Homo sapiens |
| 3628   | inositol polyphosphate-1-phosphatase                             | INPP1  | Homo sapiens |
| 3631   | inositol polyphosphate-4-phosphatase, type I, 107kDa             | INPP4A | Homo sapiens |
| 56623  | inositol polyphosphate-5-phosphatase, 72 kDa                     | INPP5E | Homo sapiens |
| 3636   | inositol polyphosphate phosphatase-like 1                        | INPPL1 | Homo sapiens |
| 3638   | insulin induced gene 1                                           | INSIG1 | Homo sapiens |
| 3641   | insulin-like 4 (placenta)                                        | INSL4  | Homo sapiens |
| 3642   | insulinoma-associated 1                                          | INSM1  | Homo sapiens |
| 3643   | insulin receptor                                                 | INSR   | Homo sapiens |
| 27130  | inversin                                                         | INVS   | Homo sapiens |
| 9670   | importin 13                                                      | IPO13  | Homo sapiens |
| 9657   | IQ motif containing B1                                           | IQCB1  | Homo sapiens |
| 23288  | IQ motif containing E                                            | IQCE   | Homo sapiens |
| 8826   | IQ motif containing GTPase activating protein 1                  | IQGAP1 | Homo sapiens |
| 10788  | IQ motif containing GTPase activating protein 2                  | IQGAP2 | Homo sapiens |
| 3654   | interleukin-1 receptor-associated kinase 1                       | IRAK1  | Homo sapiens |
| 11213  | interleukin-1 receptor-associated kinase 3                       | IRAK3  | Homo sapiens |
| 3660   | interferon regulatory factor 2                                   | IRF2   | Homo sapiens |
| 3662   | interferon regulatory factor 4                                   | IRF4   | Homo sapiens |
| 3663   | interferon regulatory factor 5                                   | IRF5   | Homo sapiens |
| 3664   | interferon regulatory factor 6                                   | IRF6   | Homo sapiens |

|       |                                                                                                       |          |              |
|-------|-------------------------------------------------------------------------------------------------------|----------|--------------|
| 3665  | interferon regulatory factor 7                                                                        | IRF7     | Homo sapiens |
| 3667  | insulin receptor substrate 1                                                                          | IRS1     | Homo sapiens |
| 8660  | insulin receptor substrate 2                                                                          | IRS2     | Homo sapiens |
| 10265 | iroquois homeobox 5                                                                                   | IRX5     | Homo sapiens |
| 3670  | ISL LIM homeobox 1                                                                                    | ISL1     | Homo sapiens |
| 3671  | immunoglobulin superfamily containing leucine-rich repeat                                             | ISLR     | Homo sapiens |
| 83737 | itchy E3 ubiquitin protein ligase homolog (mouse)                                                     | ITCH     | Homo sapiens |
| 8515  | integrin, alpha 10                                                                                    | ITGA10   | Homo sapiens |
| 3673  | integrin, alpha 2 (CD49B, alpha 2 subunit of VLA-2 receptor)                                          | ITGA2    | Homo sapiens |
| 3674  | integrin, alpha 2b (platelet glycoprotein IIb of IIb/IIIa complex, antigen CD41)                      | ITGA2B   | Homo sapiens |
| 3675  | integrin, alpha 3 (antigen CD49C, alpha 3 subunit of VLA-3 receptor)                                  | ITGA3    | Homo sapiens |
| 3676  | integrin, alpha 4 (antigen CD49D, alpha 4 subunit of VLA-4 receptor)                                  | ITGA4    | Homo sapiens |
| 3678  | integrin, alpha 5 (fibronectin receptor, alpha polypeptide)                                           | ITGA5    | Homo sapiens |
| 3679  | integrin, alpha 7                                                                                     | ITGA7    | Homo sapiens |
| 8516  | integrin, alpha 8                                                                                     | ITGA8    | Homo sapiens |
| 3680  | integrin, alpha 9                                                                                     | ITGA9    | Homo sapiens |
| 3682  | integrin, alpha E (antigen CD103, human mucosal lymphocyte antigen 1; alpha polypeptide)              | ITGAE    | Homo sapiens |
| 3683  | integrin, alpha L (antigen CD11A (p180), lymphocyte function-associated antigen 1; alpha polypeptide) | ITGAL    | Homo sapiens |
| 3684  | integrin, alpha M (complement component 3 receptor 3 subunit)                                         | ITGAM    | Homo sapiens |
| 3685  | integrin, alpha V (vitronectin receptor, alpha polypeptide, antigen CD51)                             | ITGAV    | Homo sapiens |
| 3687  | integrin, alpha X (complement component 3 receptor 4 subunit)                                         | ITGAX    | Homo sapiens |
| 9270  | integrin beta 1 binding protein 1                                                                     | ITGB1BP1 | Homo sapiens |
| 3689  | integrin, beta 2 (complement component 3 receptor 3 and 4 subunit)                                    | ITGB2    | Homo sapiens |
| 3690  | integrin, beta 3 (platelet glycoprotein IIIa, antigen CD61)                                           | ITGB3    | Homo sapiens |
| 23421 | integrin beta 3 binding protein (beta3-endonexin)                                                     | ITGB3BP  | Homo sapiens |
| 3691  | integrin, beta 4                                                                                      | ITGB4    | Homo sapiens |
| 3693  | integrin, beta 5                                                                                      | ITGB5    | Homo sapiens |
| 3694  | integrin, beta 6                                                                                      | ITGB6    | Homo sapiens |
| 3695  | integrin, beta 7                                                                                      | ITGB7    | Homo sapiens |
| 3696  | integrin, beta 8                                                                                      | ITGB8    | Homo sapiens |
| 9358  | integrin, beta-like 1 (with EGF-like repeat domains)                                                  | ITGBL1   | Homo sapiens |
| 3697  | inter-alpha (globulin) inhibitor H1                                                                   | ITIH1    | Homo sapiens |
| 3698  | inter-alpha (globulin) inhibitor H2                                                                   | ITIH2    | Homo sapiens |
| 3699  | inter-alpha (globulin) inhibitor H3                                                                   | ITIH3    | Homo sapiens |
| 3700  | inter-alpha (globulin) inhibitor H4 (plasma Kallikrein-sensitive glycoprotein)                        | ITIH4    | Homo sapiens |
| 9452  | integral membrane protein 2A                                                                          | ITM2A    | Homo sapiens |
| 9445  | integral membrane protein 2B                                                                          | ITM2B    | Homo sapiens |
| 81618 | integral membrane protein 2C                                                                          | ITM2C    | Homo sapiens |
| 3705  | inositol 1,3,4-triphosphate 5/6 kinase                                                                | ITPK1    | Homo sapiens |
| 3706  | inositol 1,4,5-trisphosphate 3-kinase A                                                               | ITPKA    | Homo sapiens |
| 3708  | inositol 1,4,5-triphosphate receptor, type 1                                                          | ITPR1    | Homo sapiens |
| 3710  | inositol 1,4,5-triphosphate receptor, type 3                                                          | ITPR3    | Homo sapiens |

|        |                                                                                                     |          |              |
|--------|-----------------------------------------------------------------------------------------------------|----------|--------------|
| 50618  | intersectin 2                                                                                       | ITSN2    | Homo sapiens |
| 3712   | isovaleryl Coenzyme A dehydrogenase                                                                 | IVD      | Homo sapiens |
| 3713   | involucrin                                                                                          | IVL      | Homo sapiens |
| 10625  | influenza virus NS1A binding protein                                                                | IVNS1ABP | Homo sapiens |
| 3716   | Janus kinase 1                                                                                      | JAK1     | Homo sapiens |
| 3718   | Janus kinase 3                                                                                      | JAK3     | Homo sapiens |
| 58494  | junctional adhesion molecule 2                                                                      | JAM2     | Homo sapiens |
| 83700  | junctional adhesion molecule 3                                                                      | JAM3     | Homo sapiens |
| 221037 | jumonji domain containing 1C                                                                        | JMJD1C   | Homo sapiens |
| 57338  | junctophilin 3                                                                                      | JPH3     | Homo sapiens |
| 8690   | jerky homolog-like (mouse)                                                                          | JRKL     | Homo sapiens |
| 10899  | jumping translocation breakpoint                                                                    | JTB      | Homo sapiens |
| 84962  | jub, ajuba homolog (Xenopus laevis)                                                                 | JUB      | Homo sapiens |
| 3726   | jun B proto-oncogene                                                                                | JUNB     | Homo sapiens |
| 3728   | junction plakoglobin                                                                                | JUP      | Homo sapiens |
| 3730   | Kallmann syndrome 1 sequence                                                                        | KAL1     | Homo sapiens |
| 3735   | lysyl-tRNA synthetase                                                                               | KARS     | Homo sapiens |
| 11104  | katanin p60 (ATPase-containing) subunit A 1                                                         | KATNA1   | Homo sapiens |
| 10300  | katanin p80 (WD repeat containing) subunit B 1                                                      | KATNB1   | Homo sapiens |
| 3736   | potassium voltage-gated channel, shaker-related subfamily, member 1 (episodic ataxia with myokymia) | KCNA1    | Homo sapiens |
| 3739   | potassium voltage-gated channel, shaker-related subfamily, member 4                                 | KCNA4    | Homo sapiens |
| 3741   | potassium voltage-gated channel, shaker-related subfamily, member 5                                 | KCNA5    | Homo sapiens |
| 7881   | potassium voltage-gated channel, shaker-related subfamily, beta member 1                            | KCNAB1   | Homo sapiens |
| 3746   | potassium voltage-gated channel, Shaw-related subfamily, member 1                                   | KCNC1    | Homo sapiens |
| 3750   | potassium voltage-gated channel, Shal-related subfamily, member 1                                   | KCND1    | Homo sapiens |
| 3754   | potassium voltage-gated channel, subfamily F, member 1                                              | KCNF1    | Homo sapiens |
| 3755   | potassium voltage-gated channel, subfamily G, member 1                                              | KCNG1    | Homo sapiens |
| 3757   | potassium voltage-gated channel, subfamily H (eag-related), member 2                                | KCNH2    | Homo sapiens |
| 3758   | potassium inwardly-rectifying channel, subfamily J, member 1                                        | KCNJ1    | Homo sapiens |
| 3766   | potassium inwardly-rectifying channel, subfamily J, member 10                                       | KCNJ10   | Homo sapiens |
| 3772   | potassium inwardly-rectifying channel, subfamily J, member 15                                       | KCNJ15   | Homo sapiens |
| 3760   | potassium inwardly-rectifying channel, subfamily J, member 3                                        | KCNJ3    | Homo sapiens |
| 3761   | potassium inwardly-rectifying channel, subfamily J, member 4                                        | KCNJ4    | Homo sapiens |
| 3764   | potassium inwardly-rectifying channel, subfamily J, member 8                                        | KCNJ8    | Homo sapiens |
| 3775   | potassium channel, subfamily K, member 1                                                            | KCNK1    | Homo sapiens |
| 3778   | potassium large conductance calcium-activated channel, subfamily M, alpha member 1                  | KCNMA1   | Homo sapiens |
| 3779   | potassium large conductance calcium-activated channel, subfamily M, beta member 1                   | KCNMB1   | Homo sapiens |
| 3782   | potassium intermediate/small conductance calcium-activated channel, subfamily N, member 3           | KCNN3    | Homo sapiens |
| 3783   | potassium intermediate/small conductance calcium-activated channel, subfamily N, member 4           | KCNN4    | Homo sapiens |

|        |                                                                                                                                                                                                       |          |              |
|--------|-------------------------------------------------------------------------------------------------------------------------------------------------------------------------------------------------------|----------|--------------|
| 3785   | potassium voltage-gated channel, KQT-like subfamily, member 2                                                                                                                                         | KCNQ2    | Homo sapiens |
| 3786   | potassium voltage-gated channel, KQT-like subfamily, member 3                                                                                                                                         | KCNQ3    | Homo sapiens |
| 3787   | potassium voltage-gated channel, delayed-rectifier, subfamily S, member 1                                                                                                                             | KCNS1    | Homo sapiens |
| 3790   | potassium voltage-gated channel, delayed-rectifier, subfamily S, member 3                                                                                                                             | KCNS3    | Homo sapiens |
| 10945  | KDEL (Lys-Asp-Glu-Leu) endoplasmic reticulum protein retention receptor 1                                                                                                                             | KDELR1   | Homo sapiens |
| 11014  | KDEL (Lys-Asp-Glu-Leu) endoplasmic reticulum protein retention receptor 2                                                                                                                             | KDELR2   | Homo sapiens |
| 3791   | kinase insert domain receptor (a type III receptor tyrosine kinase)                                                                                                                                   | KDR      | Homo sapiens |
| 3792   | Kell blood group, metallo-endopeptidase                                                                                                                                                               | KEL      | Homo sapiens |
| 10657  | KH domain containing, RNA binding, signal transduction associated 1                                                                                                                                   | KHDRBS1  | Homo sapiens |
| 10656  | KH domain containing, RNA binding, signal transduction associated 3                                                                                                                                   | KHDRBS3  | Homo sapiens |
| 3795   | ketohexokinase (fructokinase)                                                                                                                                                                         | KHK      | Homo sapiens |
| 8570   | KH-type splicing regulatory protein                                                                                                                                                                   | KHSRP    | Homo sapiens |
| 23506  | KIAA0240                                                                                                                                                                                              | KIAA0240 | Homo sapiens |
| 9856   | KIAA0319                                                                                                                                                                                              | KIAA0319 | Homo sapiens |
| 23376  | KIAA0776                                                                                                                                                                                              | KIAA0776 | Homo sapiens |
| 26128  | KIAA1279                                                                                                                                                                                              | KIAA1279 | Homo sapiens |
| 23303  | kinesin family member 13B                                                                                                                                                                             | KIF13B   | Homo sapiens |
| 547    | kinesin family member 1A                                                                                                                                                                              | KIF1A    | Homo sapiens |
| 10749  | kinesin family member 1C                                                                                                                                                                              | KIF1C    | Homo sapiens |
| 3835   | kinesin family member 22                                                                                                                                                                              | KIF22    | Homo sapiens |
| 9493   | kinesin family member 23                                                                                                                                                                              | KIF23    | Homo sapiens |
| 11004  | kinesin family member 2C                                                                                                                                                                              | KIF2C    | Homo sapiens |
| 11127  | kinesin family member 3A                                                                                                                                                                              | KIF3A    | Homo sapiens |
| 3797   | kinesin family member 3C                                                                                                                                                                              | KIF3C    | Homo sapiens |
| 3799   | kinesin family member 5B                                                                                                                                                                              | KIF5B    | Homo sapiens |
| 22920  | kinesin-associated protein 3                                                                                                                                                                          | KIFAP3   | Homo sapiens |
| 3833   | kinesin family member C1                                                                                                                                                                              | KIFC1    | Homo sapiens |
| 3801   | kinesin family member C3                                                                                                                                                                              | KIFC3    | Homo sapiens |
| 22944  | KIN, antigenic determinant of recA protein homolog (mouse)                                                                                                                                            | KIN      | Homo sapiens |
| 652799 | similar to Mast/stem cell growth factor receptor precursor (SCFR) (Proto-oncogene tyrosine-protein kinase Kit) (c-kit) (CD117 antigen); v-kit Hardy-Zuckerman 4 feline sarcoma viral oncogene homolog | KIT      | Homo sapiens |
| 653882 | similar to Mast/stem cell growth factor receptor precursor (SCFR) (Proto-oncogene tyrosine-protein kinase Kit) (c-kit) (CD117 antigen); v-kit Hardy-Zuckerman 4 feline sarcoma viral oncogene homolog | KIT      | Homo sapiens |
| 3815   | similar to Mast/stem cell growth factor receptor precursor (SCFR) (Proto-oncogene tyrosine-protein kinase Kit) (c-kit) (CD117 antigen); v-kit Hardy-Zuckerman 4 feline sarcoma viral oncogene homolog | KIT      | Homo sapiens |
| 4254   | KIT ligand                                                                                                                                                                                            | KITLG    | Homo sapiens |
| 10661  | Kruppel-like factor 1 (erythroid)                                                                                                                                                                     | KLF1     | Homo sapiens |
| 11278  | Kruppel-like factor 12                                                                                                                                                                                | KLF12    | Homo sapiens |
| 28999  | Kruppel-like factor 15                                                                                                                                                                                | KLF15    | Homo sapiens |
| 688    | Kruppel-like factor 5 (intestinal)                                                                                                                                                                    | KLF5     | Homo sapiens |
| 8609   | Kruppel-like factor 7 (ubiquitous)                                                                                                                                                                    | KLF7     | Homo sapiens |

|        |                                                                |        |              |
|--------|----------------------------------------------------------------|--------|--------------|
| 116138 | kelch domain containing 3                                      | KLHDC3 | Homo sapiens |
| 5655   | kallikrein-related peptidase 10                                | KLK10  | Homo sapiens |
| 11012  | kallikrein-related peptidase 11                                | KLK11  | Homo sapiens |
| 26085  | kallikrein-related peptidase 13                                | KLK13  | Homo sapiens |
| 3817   | kallikrein-related peptidase 2                                 | KLK2   | Homo sapiens |
| 354    | kallikrein-related peptidase 3                                 | KLK3   | Homo sapiens |
| 5653   | kallikrein-related peptidase 6                                 | KLK6   | Homo sapiens |
| 5650   | kallikrein-related peptidase 7                                 | KLK7   | Homo sapiens |
| 3818   | kallikrein B, plasma (Fletcher factor) 1                       | KLKB1  | Homo sapiens |
| 3820   | killer cell lectin-like receptor subfamily B, member 1         | KLRB1  | Homo sapiens |
| 10219  | killer cell lectin-like receptor subfamily G, member 1         | KLRG1  | Homo sapiens |
| 8564   | kynurenine 3-monooxygenase (kynurenine 3-hydroxylase)          | KMO    | Homo sapiens |
| 3827   | kininogen 1                                                    | KNG1   | Homo sapiens |
| 9735   | kinetochore associated 1                                       | KNTC1  | Homo sapiens |
| 3839   | karyopherin alpha 3 (importin alpha 4)                         | KPNA3  | Homo sapiens |
| 3841   | karyopherin alpha 5 (importin alpha 6)                         | KPNA5  | Homo sapiens |
| 23633  | karyopherin alpha 6 (importin alpha 7)                         | KPNA6  | Homo sapiens |
| 3858   | keratin 10                                                     | KRT10  | Homo sapiens |
| 729682 | keratin 17; keratin 17 pseudogene 3                            | KRT17  | Homo sapiens |
| 3872   | keratin 17; keratin 17 pseudogene 3                            | KRT17  | Homo sapiens |
| 3875   | keratin 18; keratin 18 pseudogene 26; keratin 18 pseudogene 19 | KRT18  | Homo sapiens |
| 339781 | keratin 18; keratin 18 pseudogene 26; keratin 18 pseudogene 19 | KRT18  | Homo sapiens |
| 729634 | keratin 18; keratin 18 pseudogene 26; keratin 18 pseudogene 19 | KRT18  | Homo sapiens |
| 54474  | keratin 20                                                     | KRT20  | Homo sapiens |
| 3851   | keratin 4                                                      | KRT4   | Homo sapiens |
| 3855   | keratin 7                                                      | KRT7   | Homo sapiens |
| 3895   | kinectin 1 (kinesin receptor)                                  | KTN1   | Homo sapiens |
| 8942   | kynureninase (L-kynurenine hydrolase)                          | KYNU   | Homo sapiens |
| 3898   | ladinin 1                                                      | LAD1   | Homo sapiens |
| 3902   | lymphocyte-activation gene 3                                   | LAG3   | Homo sapiens |
| 3903   | leukocyte-associated immunoglobulin-like receptor 1            | LAIR1  | Homo sapiens |
| 3904   | leukocyte-associated immunoglobulin-like receptor 2            | LAIR2  | Homo sapiens |
| 3908   | laminin, alpha 2                                               | LAMA2  | Homo sapiens |
| 3909   | laminin, alpha 3                                               | LAMA3  | Homo sapiens |
| 3910   | laminin, alpha 4                                               | LAMA4  | Homo sapiens |
| 3911   | laminin, alpha 5                                               | LAMA5  | Homo sapiens |
| 3912   | laminin, beta 1                                                | LAMB1  | Homo sapiens |
| 3913   | laminin, beta 2 (laminin S)                                    | LAMB2  | Homo sapiens |
| 3915   | laminin, gamma 1 (formerly LAMB2)                              | LAMC1  | Homo sapiens |
| 3918   | laminin, gamma 2                                               | LAMC2  | Homo sapiens |
| 10314  | LanC lantibiotic synthetase component C-like 1 (bacterial)     | LANCL1 | Homo sapiens |
| 23395  | leucyl-tRNA synthetase 2, mitochondrial                        | LARS2  | Homo sapiens |
| 3927   | LIM and SH3 protein 1                                          | LASP1  | Homo sapiens |
| 79603  | LAG1 homolog, ceramide synthase 4                              | LASS4  | Homo sapiens |
| 253782 | LAG1 homolog, ceramide synthase 6                              | LASS6  | Homo sapiens |
| 27040  | linker for activation of T cells                               | LAT    | Homo sapiens |

|       |                                                                                   |          |              |
|-------|-----------------------------------------------------------------------------------|----------|--------------|
| 3930  | lamin B receptor                                                                  | LBR      | Homo sapiens |
| 3931  | lecithin-cholesterol acyltransferase                                              | LCAT     | Homo sapiens |
| 3932  | lymphocyte-specific protein tyrosine kinase                                       | LCK      | Homo sapiens |
| 3934  | lipocalin 2                                                                       | LCN2     | Homo sapiens |
| 3937  | lymphocyte cytosolic protein 2 (SH2 domain containing leukocyte protein of 76kDa) | LCP2     | Homo sapiens |
| 8861  | LIM domain binding 1                                                              | LDB1     | Homo sapiens |
| 9079  | LIM domain binding 2                                                              | LDB2     | Homo sapiens |
| 3939  | lactate dehydrogenase A                                                           | LDHA     | Homo sapiens |
| 3945  | lactate dehydrogenase B                                                           | LDHB     | Homo sapiens |
| 11061 | leukocyte cell derived chemotaxin 1                                               | LECT1    | Homo sapiens |
| 51176 | lymphoid enhancer-binding factor 1                                                | LEF1     | Homo sapiens |
| 3952  | leptin                                                                            | LEP      | Homo sapiens |
| 3953  | leptin receptor                                                                   | LEPR     | Homo sapiens |
| 64175 | leucine proline-enriched proteoglycan (leprecan) 1                                | LEPRE1   | Homo sapiens |
| 23484 | leptin receptor overlapping transcript-like 1                                     | LEPROTL1 | Homo sapiens |
| 3955  | LFNG O-fucosylpeptide 3-beta-N-acetylglucosaminyltransferase                      | LFNG     | Homo sapiens |
| 3956  | lectin, galactoside-binding, soluble, 1                                           | LGALS1   | Homo sapiens |
| 85329 | lectin, galactoside-binding, soluble, 12                                          | LGALS12  | Homo sapiens |
| 29124 | lectin, galactoside-binding, soluble, 13                                          | LGALS13  | Homo sapiens |
| 3958  | lectin, galactoside-binding, soluble, 3                                           | LGALS3   | Homo sapiens |
| 3959  | lectin, galactoside-binding, soluble, 3 binding protein                           | LGALS3BP | Homo sapiens |
| 3960  | lectin, galactoside-binding, soluble, 4                                           | LGALS4   | Homo sapiens |
| 3965  | lectin, galactoside-binding, soluble, 9                                           | LGALS9   | Homo sapiens |
| 9211  | leucine-rich, glioma inactivated 1                                                | LGI1     | Homo sapiens |
| 5641  | legumain                                                                          | LGMN     | Homo sapiens |
| 3972  | luteinizing hormone beta polypeptide                                              | LHB      | Homo sapiens |
| 3975  | LIM homeobox 1                                                                    | LHX1     | Homo sapiens |
| 11019 | lipoic acid synthetase                                                            | LIAS     | Homo sapiens |
| 3976  | leukemia inhibitory factor (cholinergic differentiation factor)                   | LIF      | Homo sapiens |
| 3977  | leukemia inhibitory factor receptor alpha                                         | LIFR     | Homo sapiens |
| 3978  | ligase I, DNA, ATP-dependent                                                      | LIG1     | Homo sapiens |
| 3980  | ligase III, DNA, ATP-dependent                                                    | LIG3     | Homo sapiens |
| 3981  | ligase IV, DNA, ATP-dependent                                                     | LIG4     | Homo sapiens |
| 3984  | LIM domain kinase 1                                                               | LIMK1    | Homo sapiens |
| 3987  | LIM and senescent cell antigen-like domains 1                                     | LIMS1    | Homo sapiens |
| 8825  | lin-7 homolog A (C. elegans)                                                      | LIN7A    | Homo sapiens |
| 3988  | lipase A, lysosomal acid, cholesterol esterase                                    | LIPA     | Homo sapiens |
| 3990  | lipase, hepatic                                                                   | LIPC     | Homo sapiens |
| 3991  | lipase, hormone-sensitive                                                         | LIPE     | Homo sapiens |
| 9388  | lipase, endothelial                                                               | LIPG     | Homo sapiens |
| 9516  | lipopolysaccharide-induced TNF factor                                             | LITAF    | Homo sapiens |
| 3996  | lethal giant larvae homolog 1 (Drosophila)                                        | LLGL1    | Homo sapiens |
| 3998  | lectin, mannose-binding, 1                                                        | LMAN1    | Homo sapiens |
| 29995 | LIM and cysteine-rich domains 1                                                   | LMCD1    | Homo sapiens |
| 4000  | lamin A/C                                                                         | LMNA     | Homo sapiens |

|        |                                                                                                 |         |              |
|--------|-------------------------------------------------------------------------------------------------|---------|--------------|
| 4004   | LIM domain only 1 (rhombotin 1)                                                                 | LMO1    | Homo sapiens |
| 4005   | LIM domain only 2 (rhombotin-like 1)                                                            | LMO2    | Homo sapiens |
| 4008   | LIM domain 7                                                                                    | LMO7    | Homo sapiens |
| 22853  | lemur tyrosine kinase 2                                                                         | LMTK2   | Homo sapiens |
| 4010   | LIM homeobox transcription factor 1, beta                                                       | LMX1B   | Homo sapiens |
| 4012   | leucyl/cystinyl aminopeptidase                                                                  | LNPEP   | Homo sapiens |
| 4015   | lysyl oxidase                                                                                   | LOX     | Homo sapiens |
| 4017   | lysyl oxidase-like 2                                                                            | LOXL2   | Homo sapiens |
| 23266  | latrophilin 2                                                                                   | LPHN2   | Homo sapiens |
| 23284  | latrophilin 3                                                                                   | LPHN3   | Homo sapiens |
| 23175  | lipin 1                                                                                         | LPIN1   | Homo sapiens |
| 9663   | lipin 2                                                                                         | LPIN2   | Homo sapiens |
| 4023   | lipoprotein lipase                                                                              | LPL     | Homo sapiens |
| 9404   | leupaxin                                                                                        | LPXN    | Homo sapiens |
| 987    | LPS-responsive vesicle trafficking, beach and anchor containing                                 | LRBA    | Homo sapiens |
| 23143  | leucine-rich repeats and calponin homology (CH) domain containing 1                             | LRCH1   | Homo sapiens |
| 4033   | lymphoid-restricted membrane protein                                                            | LRMP    | Homo sapiens |
| 4035   | low density lipoprotein-related protein 1 (alpha-2-macroglobulin receptor)                      | LRP1    | Homo sapiens |
| 26020  | low density lipoprotein receptor-related protein 10                                             | LRP10   | Homo sapiens |
| 4036   | low density lipoprotein-related protein 2                                                       | LRP2    | Homo sapiens |
| 4041   | low density lipoprotein receptor-related protein 5                                              | LRP5    | Homo sapiens |
| 4040   | low density lipoprotein receptor-related protein 6                                              | LRP6    | Homo sapiens |
| 7804   | low density lipoprotein receptor-related protein 8, apolipoprotein e receptor                   | LRP8    | Homo sapiens |
| 4043   | low density lipoprotein receptor-related protein associated protein 1                           | LRPAP1  | Homo sapiens |
| 10128  | leucine-rich PPR-motif containing                                                               | LRPPRC  | Homo sapiens |
| 10234  | leucine rich repeat containing 17                                                               | LRRC17  | Homo sapiens |
| 23639  | leucine rich repeat containing 6                                                                | LRRC6   | Homo sapiens |
| 9208   | leucine rich repeat (in FLII) interacting protein 1                                             | LRRFIP1 | Homo sapiens |
| 4045   | limbic system-associated membrane protein                                                       | LSAMP   | Homo sapiens |
| 27257  | LSM1 homolog, U6 small nuclear RNA associated ( <i>S. cerevisiae</i> )                          | LSM1    | Homo sapiens |
| 84967  | LSM10, U7 small nuclear RNA associated                                                          | LSM10   | Homo sapiens |
| 647302 | LSM3 homolog, U6 small nuclear RNA associated ( <i>S. cerevisiae</i> ); similar to Lsm3 protein | LSM3    | Homo sapiens |
| 27258  | LSM3 homolog, U6 small nuclear RNA associated ( <i>S. cerevisiae</i> ); similar to Lsm3 protein | LSM3    | Homo sapiens |
| 25804  | LSM4 homolog, U6 small nuclear RNA associated ( <i>S. cerevisiae</i> )                          | LSM4    | Homo sapiens |
| 23658  | LSM5 homolog, U6 small nuclear RNA associated ( <i>S. cerevisiae</i> )                          | LSM5    | Homo sapiens |
| 11157  | LSM6 homolog, U6 small nuclear RNA associated ( <i>S. cerevisiae</i> )                          | LSM6    | Homo sapiens |
| 4047   | lanosterol synthase (2,3-oxidosqualene-lanosterol cyclase)                                      | LSS     | Homo sapiens |
| 7940   | leukocyte specific transcript 1                                                                 | LST1    | Homo sapiens |
| 4048   | leukotriene A4 hydrolase                                                                        | LTA4H   | Homo sapiens |
| 4050   | lymphotoxin beta (TNF superfamily, member 3)                                                    | LTB     | Homo sapiens |
| 4052   | latent transforming growth factor beta binding protein 1                                        | LTBP1   | Homo sapiens |
| 4053   | latent transforming growth factor beta binding protein 2                                        | LTBP2   | Homo sapiens |

|        |                                                                                                 |         |              |
|--------|-------------------------------------------------------------------------------------------------|---------|--------------|
| 4055   | lymphotoxin beta receptor (TNFR superfamily, member 3)                                          | LTBR    | Homo sapiens |
| 4056   | leukotriene C4 synthase                                                                         | LTC4S   | Homo sapiens |
| 4057   | lactotransferrin                                                                                | LTF     | Homo sapiens |
| 4058   | leukocyte receptor tyrosine kinase                                                              | LTK     | Homo sapiens |
| 4060   | lumican                                                                                         | LUM     | Homo sapiens |
| 7798   | leucine zipper protein 1                                                                        | LUZP1   | Homo sapiens |
| 4061   | lymphocyte antigen 6 complex, locus E                                                           | LY6E    | Homo sapiens |
| 80740  | lymphocyte antigen 6 complex, locus G6C                                                         | LY6G6C  | Homo sapiens |
| 9936   | CD302 molecule; lymphocyte antigen 75                                                           | LY75    | Homo sapiens |
| 4065   | CD302 molecule; lymphocyte antigen 75                                                           | LY75    | Homo sapiens |
| 4063   | lymphocyte antigen 9                                                                            | LY9     | Homo sapiens |
| 23643  | lymphocyte antigen 96                                                                           | LY96    | Homo sapiens |
| 4067   | v-yes-1 Yamaguchi sarcoma viral related oncogene homolog                                        | LYN     | Homo sapiens |
| 653639 | lysophospholipase II pseudogene 1; lysophospholipase II                                         | LYPLA2  | Homo sapiens |
| 11313  | lysophospholipase II pseudogene 1; lysophospholipase II                                         | LYPLA2  | Homo sapiens |
| 4069   | lysozyme (renal amyloidosis)                                                                    | LYZ     | Homo sapiens |
| 57151  | lysozyme-like 6                                                                                 | LYZL6   | Homo sapiens |
| 4074   | mannose-6-phosphate receptor (cation dependent)                                                 | M6PR    | Homo sapiens |
| 4085   | MAD2 mitotic arrest deficient-like 1 (yeast)                                                    | MAD2L1  | Homo sapiens |
| 8174   | mucosal vascular addressin cell adhesion molecule 1                                             | MADCAM1 | Homo sapiens |
| 8567   | MAP-kinase activating death domain                                                              | MADD    | Homo sapiens |
| 4099   | myelin associated glycoprotein                                                                  | MAG     | Homo sapiens |
| 4109   | melanoma antigen family A, 10                                                                   | MAGEA10 | Homo sapiens |
| 4107   | melanoma antigen family A, 8                                                                    | MAGEA8  | Homo sapiens |
| 4113   | melanoma antigen family B, 2                                                                    | MAGEB2  | Homo sapiens |
| 4114   | melanoma antigen family B, 3                                                                    | MAGEB3  | Homo sapiens |
| 10916  | melanoma antigen family D, 2                                                                    | MAGED2  | Homo sapiens |
| 154043 | membrane associated guanylate kinase, WW and PDZ domain containing 1; CNKSR family member 3     | MAGI1   | Homo sapiens |
| 9223   | membrane associated guanylate kinase, WW and PDZ domain containing 1; CNKSR family member 3     | MAGI1   | Homo sapiens |
| 4118   | mal, T-cell differentiation protein                                                             | MAL     | Homo sapiens |
| 10892  | mucosa associated lymphoid tissue lymphoma translocation gene 1                                 | MALT1   | Homo sapiens |
| 9794   | mastermind-like 1 (Drosophila)                                                                  | MAML1   | Homo sapiens |
| 84441  | mastermind-like 2 (Drosophila)                                                                  | MAML2   | Homo sapiens |
| 4121   | mannosidase, alpha, class 1A, member 1                                                          | MAN1A1  | Homo sapiens |
| 10905  | mannosidase, alpha, class 1A, member 2                                                          | MAN1A2  | Homo sapiens |
| 4124   | mannosidase, alpha, class 2A, member 1                                                          | MAN2A1  | Homo sapiens |
| 4122   | mannosidase, alpha, class 2A, member 2                                                          | MAN2A2  | Homo sapiens |
| 4123   | mannosidase, alpha, class 2C, member 1                                                          | MAN2C1  | Homo sapiens |
| 4126   | mannosidase, beta A, lysosomal                                                                  | MANBA   | Homo sapiens |
| 4128   | monoamine oxidase A                                                                             | MAOA    | Homo sapiens |
| 4131   | microtubule-associated protein 1B                                                               | MAP1B   | Homo sapiens |
| 4133   | microtubule-associated protein 2                                                                | MAP2    | Homo sapiens |
| 5604   | mitogen-activated protein kinase kinase 1                                                       | MAP2K1  | Homo sapiens |
| 5605   | mitogen-activated protein kinase kinase 2 pseudogene; mitogen-activated protein kinase kinase 2 | MAP2K2  | Homo sapiens |



|           |                                                                                                 |          |              |
|-----------|-------------------------------------------------------------------------------------------------|----------|--------------|
| 407835    | mitogen-activated protein kinase kinase 2 pseudogene; mitogen-activated protein kinase kinase 2 | MAP2K2   | Homo sapiens |
| 5606      | mitogen-activated protein kinase kinase 3                                                       | MAP2K3   | Homo sapiens |
| 6416      | mitogen-activated protein kinase kinase 4                                                       | MAP2K4   | Homo sapiens |
| 5608      | mitogen-activated protein kinase kinase 6                                                       | MAP2K6   | Homo sapiens |
| 5609      | mitogen-activated protein kinase kinase 7                                                       | MAP2K7   | Homo sapiens |
| 4296      | mitogen-activated protein kinase kinase kinase 11                                               | MAP3K11  | Homo sapiens |
| 7786      | mitogen-activated protein kinase kinase kinase 12                                               | MAP3K12  | Homo sapiens |
| 9020      | mitogen-activated protein kinase kinase kinase 14                                               | MAP3K14  | Homo sapiens |
| 4216      | mitogen-activated protein kinase kinase kinase 4                                                | MAP3K4   | Homo sapiens |
| 4217      | mitogen-activated protein kinase kinase kinase 5                                                | MAP3K5   | Homo sapiens |
| 6885      | mitogen-activated protein kinase kinase kinase 7                                                | MAP3K7   | Homo sapiens |
| 1326      | mitogen-activated protein kinase kinase kinase 8                                                | MAP3K8   | Homo sapiens |
| 4134      | microtubule-associated protein 4                                                                | MAP4     | Homo sapiens |
| 11184     | mitogen-activated protein kinase kinase kinase kinase 1                                         | MAP4K1   | Homo sapiens |
| 5871      | mitogen-activated protein kinase kinase kinase kinase 2                                         | MAP4K2   | Homo sapiens |
| 9448      | mitogen-activated protein kinase kinase kinase kinase 4                                         | MAP4K4   | Homo sapiens |
| 11183     | mitogen-activated protein kinase kinase kinase kinase 5                                         | MAP4K5   | Homo sapiens |
| 5602      | mitogen-activated protein kinase 10                                                             | MAPK10   | Homo sapiens |
| 5600      | mitogen-activated protein kinase 11                                                             | MAPK11   | Homo sapiens |
| 5603      | mitogen-activated protein kinase 13                                                             | MAPK13   | Homo sapiens |
| 1432      | mitogen-activated protein kinase 14                                                             | MAPK14   | Homo sapiens |
| 5595      | hypothetical LOC100271831; mitogen-activated protein kinase 3                                   | MAPK3    | Homo sapiens |
| 100271831 | hypothetical LOC100271831; mitogen-activated protein kinase 3                                   | MAPK3    | Homo sapiens |
| 5597      | mitogen-activated protein kinase 6                                                              | MAPK6    | Homo sapiens |
| 5598      | mitogen-activated protein kinase 7                                                              | MAPK7    | Homo sapiens |
| 5599      | mitogen-activated protein kinase 8                                                              | MAPK8    | Homo sapiens |
| 9479      | mitogen-activated protein kinase 8 interacting protein 1                                        | MAPK8IP1 | Homo sapiens |
| 23162     | mitogen-activated protein kinase 8 interacting protein 3                                        | MAPK8IP3 | Homo sapiens |
| 79109     | mitogen-activated protein kinase associated protein 1                                           | MAPKAP1  | Homo sapiens |
| 9261      | mitogen-activated protein kinase-activated protein kinase 2                                     | MAPKAPK2 | Homo sapiens |
| 7867      | mitogen-activated protein kinase-activated protein kinase 3                                     | MAPKAPK3 | Homo sapiens |
| 8550      | mitogen-activated protein kinase-activated protein kinase 5                                     | MAPKAPK5 | Homo sapiens |
| 22919     | microtubule-associated protein, RP/EB family, member 1                                          | MAPRE1   | Homo sapiens |
| 10982     | microtubule-associated protein, RP/EB family, member 2                                          | MAPRE2   | Homo sapiens |
| 22924     | microtubule-associated protein, RP/EB family, member 3                                          | MAPRE3   | Homo sapiens |
| 4137      | microtubule-associated protein tau                                                              | MAPT     | Homo sapiens |
| 4082      | myristoylated alanine-rich protein kinase C substrate                                           | MARCKS   | Homo sapiens |
| 8685      | macrophage receptor with collagenous structure                                                  | MARCO    | Homo sapiens |
| 4140      | MAP/microtubule affinity-regulating kinase 3                                                    | MARK3    | Homo sapiens |
| 4141      | methionyl-tRNA synthetase                                                                       | MARS     | Homo sapiens |
| 5648      | mannan-binding lectin serine peptidase 1 (C4/C2 activating component of Ra-reactive factor)     | MASP1    | Homo sapiens |
| 10747     | mannan-binding lectin serine peptidase 2                                                        | MASP2    | Homo sapiens |
| 4143      | methionine adenosyltransferase I, alpha                                                         | MAT1A    | Homo sapiens |
| 4146      | matrilin 1, cartilage matrix protein                                                            | MATN1    | Homo sapiens |

|       |                                                                                      |        |              |
|-------|--------------------------------------------------------------------------------------|--------|--------------|
| 4147  | matrilin 2                                                                           | MATN2  | Homo sapiens |
| 4149  | MYC associated factor X                                                              | MAX    | Homo sapiens |
| 4151  | myoglobin                                                                            | MB     | Homo sapiens |
| 4152  | methyl-CpG binding domain protein 1                                                  | MBD1   | Homo sapiens |
| 8932  | methyl-CpG binding domain protein 2                                                  | MBD2   | Homo sapiens |
| 53615 | methyl-CpG binding domain protein 3                                                  | MBD3   | Homo sapiens |
| 8930  | methyl-CpG binding domain protein 4                                                  | MBD4   | Homo sapiens |
| 4154  | muscleblind-like (Drosophila)                                                        | MBNL1  | Homo sapiens |
| 10150 | muscleblind-like 2 (Drosophila)                                                      | MBNL2  | Homo sapiens |
| 4155  | myelin basic protein                                                                 | MBP    | Homo sapiens |
| 8720  | membrane-bound transcription factor peptidase, site 1                                | MBTPS1 | Homo sapiens |
| 4163  | mutated in colorectal cancers                                                        | MCC    | Homo sapiens |
| 4168  | MCF.2 cell line derived transforming sequence                                        | MCF2   | Homo sapiens |
| 23263 | MCF.2 cell line derived transforming sequence-like                                   | MCF2L  | Homo sapiens |
| 4170  | myeloid cell leukemia sequence 1 (BCL2-related)                                      | MCL1   | Homo sapiens |
| 4173  | minichromosome maintenance complex component 4                                       | MCM4   | Homo sapiens |
| 4174  | minichromosome maintenance complex component 5                                       | MCM5   | Homo sapiens |
| 4175  | minichromosome maintenance complex component 6                                       | MCM6   | Homo sapiens |
| 4176  | minichromosome maintenance complex component 7                                       | MCM7   | Homo sapiens |
| 10445 | microspherule protein 1                                                              | MCRS1  | Homo sapiens |
| 28985 | malignant T cell amplified sequence 1                                                | MCTS1  | Homo sapiens |
| 4190  | malate dehydrogenase 1, NAD (soluble)                                                | MDH1   | Homo sapiens |
| 4191  | malate dehydrogenase 2, NAD (mitochondrial)                                          | MDH2   | Homo sapiens |
| 4192  | midkine (neurite growth-promoting factor 2)                                          | MDK    | Homo sapiens |
| 4193  | Mdm2 p53 binding protein homolog (mouse)                                             | MDM2   | Homo sapiens |
| 4194  | Mdm4 p53 binding protein homolog (mouse)                                             | MDM4   | Homo sapiens |
| 4199  | malic enzyme 1, NADP(+)-dependent, cytosolic                                         | ME1    | Homo sapiens |
| 4200  | malic enzyme 2, NAD(+)-dependent, mitochondrial                                      | ME2    | Homo sapiens |
| 10873 | malic enzyme 3, NADP(+)-dependent, mitochondrial                                     | ME3    | Homo sapiens |
| 4204  | methyl CpG binding protein 2 (Rett syndrome)                                         | MECP2  | Homo sapiens |
| 10001 | mediator complex subunit 6                                                           | MED6   | Homo sapiens |
| 4205  | myocyte enhancer factor 2A                                                           | MEF2A  | Homo sapiens |
| 4208  | myocyte enhancer factor 2C                                                           | MEF2C  | Homo sapiens |
| 4209  | myocyte enhancer factor 2D                                                           | MEF2D  | Homo sapiens |
| 4211  | Meis homeobox 1                                                                      | MEIS1  | Homo sapiens |
| 4212  | Meis homeobox 2                                                                      | MEIS2  | Homo sapiens |
| 9833  | maternal embryonic leucine zipper kinase                                             | MELK   | Homo sapiens |
| 10461 | c-mer proto-oncogene tyrosine kinase                                                 | MERTK  | Homo sapiens |
| 4232  | mesoderm specific transcript homolog (mouse)                                         | MEST   | Homo sapiens |
| 4233  | met proto-oncogene (hepatocyte growth factor receptor)                               | MET    | Homo sapiens |
| 10988 | methionyl aminopeptidase 2                                                           | METAP2 | Homo sapiens |
| 4234  | methyltransferase like 1                                                             | METTL1 | Homo sapiens |
| 4236  | microfibrillar-associated protein 1                                                  | MFAP1  | Homo sapiens |
| 4239  | microfibrillar-associated protein 4                                                  | MFAP4  | Homo sapiens |
| 4241  | antigen p97 (melanoma associated) identified by monoclonal antibodies 133.2 and 96.5 | MFI2   | Homo sapiens |

|        |                                                                                                                                  |        |              |
|--------|----------------------------------------------------------------------------------------------------------------------------------|--------|--------------|
| 55669  | mitofusin 1                                                                                                                      | MFN1   | Homo sapiens |
| 9927   | mitofusin 2                                                                                                                      | MFN2   | Homo sapiens |
| 4242   | MFNG O-fucosylpeptide 3-beta-N-acetylglucosaminyltransferase                                                                     | MFNG   | Homo sapiens |
| 4245   | mannosyl (alpha-1,3-)-glycoprotein beta-1,2-N-acetylglucosaminyltransferase                                                      | MGAT1  | Homo sapiens |
| 4247   | mannosyl (alpha-1,6-)-glycoprotein beta-1,2-N-acetylglucosaminyltransferase                                                      | MGAT2  | Homo sapiens |
| 11343  | monoglyceride lipase                                                                                                             | MGLL   | Homo sapiens |
| 4255   | O-6-methylguanine-DNA methyltransferase                                                                                          | MGMT   | Homo sapiens |
| 4256   | matrix Gla protein                                                                                                               | MGP    | Homo sapiens |
| 4258   | microsomal glutathione S-transferase 2                                                                                           | MGST2  | Homo sapiens |
| 4259   | microsomal glutathione S-transferase 3                                                                                           | MGST3  | Homo sapiens |
| 4276   | MHC class I polypeptide-related sequence A                                                                                       | MICA   | Homo sapiens |
| 11043  | midline 2                                                                                                                        | MID2   | Homo sapiens |
| 4282   | macrophage migration inhibitory factor (glycosylation-inhibiting factor)                                                         | MIF    | Homo sapiens |
| 9562   | multiple inositol polyphosphate histidine phosphatase, 1                                                                         | MINPP1 | Homo sapiens |
| 4286   | microphthalmia-associated transcription factor                                                                                   | MITF   | Homo sapiens |
| 4288   | antigen identified by monoclonal antibody Ki-67                                                                                  | MKI67  | Homo sapiens |
| 57496  | MKL/myocardin-like 2                                                                                                             | MKL2   | Homo sapiens |
| 4289   | muskelin 1, intracellular mediator containing kelch motifs                                                                       | MKLN1  | Homo sapiens |
| 8569   | MAP kinase interacting serine/threonine kinase 1                                                                                 | MKNK1  | Homo sapiens |
| 2872   | MAP kinase interacting serine/threonine kinase 2                                                                                 | MKNK2  | Homo sapiens |
| 7681   | makorin ring finger protein 3                                                                                                    | MKRN3  | Homo sapiens |
| 2315   | melan-A                                                                                                                          | MLANA  | Homo sapiens |
| 23209  | megalencephalic leukoencephalopathy with subcortical cysts 1                                                                     | MLC1   | Homo sapiens |
| 8079   | myeloid leukemia factor 2                                                                                                        | MLF2   | Homo sapiens |
| 4292   | mutL homolog 1, colon cancer, nonpolyposis type 2 (E. coli)                                                                      | MLH1   | Homo sapiens |
| 27030  | mutL homolog 3 (E. coli)                                                                                                         | MLH3   | Homo sapiens |
| 4297   | myeloid/lymphoid or mixed-lineage leukemia (trithorax homolog, Drosophila)                                                       | MLL    | Homo sapiens |
| 8085   | myeloid/lymphoid or mixed-lineage leukemia 2                                                                                     | MLL2   | Homo sapiens |
| 55904  | myeloid/lymphoid or mixed-lineage leukemia 5 (trithorax homolog, Drosophila)                                                     | MLL5   | Homo sapiens |
| 8028   | myeloid/lymphoid or mixed-lineage leukemia (trithorax homolog, Drosophila); translocated to, 10                                  | MLLT10 | Homo sapiens |
| 730031 | similar to Afadin (Protein AF-6); myeloid/lymphoid or mixed-lineage leukemia (trithorax homolog, Drosophila); translocated to, 4 | MLLT4  | Homo sapiens |
| 4301   | similar to Afadin (Protein AF-6); myeloid/lymphoid or mixed-lineage leukemia (trithorax homolog, Drosophila); translocated to, 4 | MLLT4  | Homo sapiens |
| 4295   | motilin                                                                                                                          | MLN    | Homo sapiens |
| 4311   | membrane metallo-endopeptidase                                                                                                   | MME    | Homo sapiens |
| 4312   | matrix metallopeptidase 1 (interstitial collagenase)                                                                             | MMP1   | Homo sapiens |
| 4319   | matrix metallopeptidase 10 (stromelysin 2)                                                                                       | MMP10  | Homo sapiens |
| 4320   | matrix metallopeptidase 11 (stromelysin 3)                                                                                       | MMP11  | Homo sapiens |
| 4321   | matrix metallopeptidase 12 (macrophage elastase)                                                                                 | MMP12  | Homo sapiens |
| 4322   | matrix metallopeptidase 13 (collagenase 3)                                                                                       | MMP13  | Homo sapiens |
| 4323   | matrix metallopeptidase 14 (membrane-inserted)                                                                                   | MMP14  | Homo sapiens |

|       |                                                                                                                          |          |              |
|-------|--------------------------------------------------------------------------------------------------------------------------|----------|--------------|
| 4324  | matrix metallopeptidase 15 (membrane-inserted)                                                                           | MMP15    | Homo sapiens |
| 4326  | matrix metallopeptidase 17 (membrane-inserted)                                                                           | MMP17    | Homo sapiens |
| 4327  | matrix metallopeptidase 19                                                                                               | MMP19    | Homo sapiens |
| 4313  | matrix metallopeptidase 2 (gelatinase A, 72kDa gelatinase, 72kDa type IV collagenase)                                    | MMP2     | Homo sapiens |
| 79148 | matrix metallopeptidase 28                                                                                               | MMP28    | Homo sapiens |
| 4316  | matrix metallopeptidase 7 (matrilysin, uterine)                                                                          | MMP7     | Homo sapiens |
| 4318  | matrix metallopeptidase 9 (gelatinase B, 92kDa gelatinase, 92kDa type IV collagenase)                                    | MMP9     | Homo sapiens |
| 4330  | meningioma (disrupted in balanced translocation) 1                                                                       | MN1      | Homo sapiens |
| 4331  | menage a trois homolog 1, cyclin H assembly factor ( <i>Xenopus laevis</i> )                                             | MNAT1    | Homo sapiens |
| 4332  | myeloid cell nuclear differentiation antigen                                                                             | MNDA     | Homo sapiens |
| 64112 | modulator of apoptosis 1                                                                                                 | MOAP1    | Homo sapiens |
| 4336  | myelin-associated oligodendrocyte basic protein                                                                          | MOBP     | Homo sapiens |
| 27304 | molybdenum cofactor synthesis 3                                                                                          | MOCS3    | Homo sapiens |
| 9643  | mortality factor 4 like 2                                                                                                | MORF4L2  | Homo sapiens |
| 56180 | motile sperm domain containing 1                                                                                         | MOSPD1   | Homo sapiens |
| 9526  | mannose-P-dolichol utilization defect 1                                                                                  | MPDU1    | Homo sapiens |
| 8777  | multiple PDZ domain protein                                                                                              | MPDZ     | Homo sapiens |
| 4350  | N-methylpurine-DNA glycosylase                                                                                           | MPG      | Homo sapiens |
| 10200 | M-phase phosphoprotein 6                                                                                                 | MPHOSPH6 | Homo sapiens |
| 10198 | M-phase phosphoprotein 9                                                                                                 | MPHOSPH9 | Homo sapiens |
| 4351  | mannose phosphate isomerase                                                                                              | MPI      | Homo sapiens |
| 4353  | myeloperoxidase                                                                                                          | MPO      | Homo sapiens |
| 4354  | membrane protein, palmitoylated 1, 55kDa                                                                                 | MPP1     | Homo sapiens |
| 4355  | membrane protein, palmitoylated 2 (MAGUK p55 subfamily member 2)                                                         | MPP2     | Homo sapiens |
| 4356  | membrane protein, palmitoylated 3 (MAGUK p55 subfamily member 3)                                                         | MPP3     | Homo sapiens |
| 51678 | membrane protein, palmitoylated 6 (MAGUK p55 subfamily member 6)                                                         | MPP6     | Homo sapiens |
| 65258 | metallophosphoesterase 1                                                                                                 | MPPE1    | Homo sapiens |
| 4357  | mercaptopyruvate sulfurtransferase                                                                                       | MPST     | Homo sapiens |
| 4358  | MpV17 mitochondrial inner membrane protein                                                                               | MPV17    | Homo sapiens |
| 4359  | myelin protein zero                                                                                                      | MPZ      | Homo sapiens |
| 9019  | myelin protein zero-like 1                                                                                               | MPZL1    | Homo sapiens |
| 3140  | major histocompatibility complex, class I-related                                                                        | MR1      | Homo sapiens |
| 4361  | MRE11 meiotic recombination 11 homolog A ( <i>S. cerevisiae</i> )                                                        | MRE11A   | Homo sapiens |
| 6182  | mitochondrial ribosomal protein L12                                                                                      | MRPL12   | Homo sapiens |
| 10573 | mitochondrial ribosomal protein L28                                                                                      | MRPL28   | Homo sapiens |
| 9553  | mitochondrial ribosomal protein L33                                                                                      | MRPL33   | Homo sapiens |
| 64963 | mitochondrial ribosomal protein S11                                                                                      | MRPS11   | Homo sapiens |
| 6183  | mitochondrial ribosomal protein S12                                                                                      | MRPS12   | Homo sapiens |
| 931   | membrane-spanning 4-domains, subfamily A, member 1                                                                       | MS4A1    | Homo sapiens |
| 2206  | membrane-spanning 4-domains, subfamily A, member 2 (Fc fragment of IgE, high affinity I, receptor for; beta polypeptide) | MS4A2    | Homo sapiens |
| 4436  | mutS homolog 2, colon cancer, nonpolyposis type 1 ( <i>E. coli</i> )                                                     | MSH2     | Homo sapiens |

|           |                                                                                                                                         |        |              |
|-----------|-----------------------------------------------------------------------------------------------------------------------------------------|--------|--------------|
| 4437      | mutS homolog 3 (E. coli)                                                                                                                | MSH3   | Homo sapiens |
| 10232     | mesothelin                                                                                                                              | MSLN   | Homo sapiens |
| 4477      | microseminoprotein, beta-                                                                                                               | MSMB   | Homo sapiens |
| 4486      | macrophage stimulating 1 receptor (c-met-related tyrosine kinase)                                                                       | MST1R  | Homo sapiens |
| 4487      | msh homeobox 1                                                                                                                          | MSX1   | Homo sapiens |
| 4507      | methylthioadenosine phosphorylase                                                                                                       | MTAP   | Homo sapiens |
| 4515      | mature T-cell proliferation 1 neighbor; mature T-cell proliferation 1                                                                   | MTCP1  | Homo sapiens |
| 100272147 | mature T-cell proliferation 1 neighbor; mature T-cell proliferation 1                                                                   | MTCP1  | Homo sapiens |
| 4522      | methylenetetrahydrofolate dehydrogenase (NADP+ dependent) 1, methenyltetrahydrofolate cyclohydrolase, formyltetrahydrofolate synthetase | MTHFD1 | Homo sapiens |
| 10797     | methylenetetrahydrofolate dehydrogenase (NADP+ dependent) 2, methenyltetrahydrofolate cyclohydrolase                                    | MTHFD2 | Homo sapiens |
| 4524      | 5,10-methylenetetrahydrofolate reductase (NADPH)                                                                                        | MTHFR  | Homo sapiens |
| 4528      | mitochondrial translational initiation factor 2                                                                                         | MTIF2  | Homo sapiens |
| 8776      | myotubularin related protein 1                                                                                                          | MTMR1  | Homo sapiens |
| 8898      | myotubularin related protein 2                                                                                                          | MTMR2  | Homo sapiens |
| 9110      | myotubularin related protein 4                                                                                                          | MTMR4  | Homo sapiens |
| 9788      | metastasis suppressor 1                                                                                                                 | MTSS1  | Homo sapiens |
| 10651     | metaxin 2                                                                                                                               | MTX2   | Homo sapiens |
| 4585      | mucin 4, cell surface associated                                                                                                        | MUC4   | Homo sapiens |
| 4589      | mucin 7, secreted                                                                                                                       | MUC7   | Homo sapiens |
| 4593      | muscle, skeletal, receptor tyrosine kinase                                                                                              | MUSK   | Homo sapiens |
| 4594      | methylmalonyl Coenzyme A mutase                                                                                                         | MUT    | Homo sapiens |
| 4595      | mutY homolog (E. coli)                                                                                                                  | MUTYH  | Homo sapiens |
| 4597      | mevalonate (diphospho) decarboxylase                                                                                                    | MVD    | Homo sapiens |
| 4599      | myxovirus (influenza virus) resistance 1, interferon-inducible protein p78 (mouse)                                                      | MX1    | Homo sapiens |
| 4600      | myxovirus (influenza virus) resistance 2 (mouse)                                                                                        | MX2    | Homo sapiens |
| 10608     | MAX dimerization protein 4                                                                                                              | MXD4   | Homo sapiens |
| 4601      | MAX interactor 1                                                                                                                        | MXI1   | Homo sapiens |
| 4602      | v-myb myeloblastosis viral oncogene homolog (avian)                                                                                     | MYB    | Homo sapiens |
| 4605      | v-myb myeloblastosis viral oncogene homolog (avian)-like 2                                                                              | MYBL2  | Homo sapiens |
| 4609      | v-myc myelocytomatosis viral oncogene homolog (avian)                                                                                   | MYC    | Homo sapiens |
| 23077     | MYC binding protein 2                                                                                                                   | MYCBP2 | Homo sapiens |
| 4610      | v-myc myelocytomatosis viral oncogene homolog 1, lung carcinoma derived (avian)                                                         | MYCL1  | Homo sapiens |
| 4613      | v-myc myelocytomatosis viral related oncogene, neuroblastoma derived (avian)                                                            | MYCN   | Homo sapiens |
| 4615      | myeloid differentiation primary response gene (88)                                                                                      | MYD88  | Homo sapiens |
| 50804     | myelin expression factor 2                                                                                                              | MYEF2  | Homo sapiens |
| 4628      | myosin, heavy chain 10, non-muscle                                                                                                      | MYH10  | Homo sapiens |
| 4629      | myosin, heavy chain 11, smooth muscle                                                                                                   | MYH11  | Homo sapiens |
| 4627      | myosin, heavy chain 9, non-muscle                                                                                                       | MYH9   | Homo sapiens |
| 4633      | myosin, light chain 2, regulatory, cardiac, slow                                                                                        | MYL2   | Homo sapiens |
| 4637      | myosin, light chain 6, alkali, smooth muscle and non-muscle                                                                             | MYL6   | Homo sapiens |
| 29116     | myosin regulatory light chain interacting protein                                                                                       | MYLIP  | Homo sapiens |

|        |                                                                                                                  |         |              |
|--------|------------------------------------------------------------------------------------------------------------------|---------|--------------|
| 4638   | myosin light chain kinase                                                                                        | MYLK    | Homo sapiens |
| 4651   | myosin X                                                                                                         | MYO10   | Homo sapiens |
| 4430   | myosin IB                                                                                                        | MYO1B   | Homo sapiens |
| 4642   | myosin ID                                                                                                        | MYO1D   | Homo sapiens |
| 4643   | myosin IE                                                                                                        | MYO1E   | Homo sapiens |
| 4644   | myosin VA (heavy chain 12, myoxin)                                                                               | MYO5A   | Homo sapiens |
| 4646   | myosin VI                                                                                                        | MYO6    | Homo sapiens |
| 4647   | myosin VIIA                                                                                                      | MYO7A   | Homo sapiens |
| 4653   | myocilin, trabecular meshwork inducible glucocorticoid response                                                  | MYOC    | Homo sapiens |
| 4656   | myogenin (myogenic factor 4)                                                                                     | MYOG    | Homo sapiens |
| 9172   | myomesin (M-protein) 2, 165kDa                                                                                   | MYOM2   | Homo sapiens |
| 84148  | MYST histone acetyltransferase 1                                                                                 | MYST1   | Homo sapiens |
| 7994   | MYST histone acetyltransferase (monocytic leukemia) 3                                                            | MYST3   | Homo sapiens |
| 23522  | MYST histone acetyltransferase (monocytic leukemia) 4                                                            | MYST4   | Homo sapiens |
| 23040  | myelin transcription factor 1-like                                                                               | MYT1L   | Homo sapiens |
| 4664   | NGFI-A binding protein 1 (EGR1 binding protein 1)                                                                | NAB1    | Homo sapiens |
| 4665   | NGFI-A binding protein 2 (EGR1 binding protein 2)                                                                | NAB2    | Homo sapiens |
| 4668   | N-acetylgalactosaminidase, alpha-                                                                                | NAGA    | Homo sapiens |
| 51172  | N-acetylglucosamine-1-phosphodiester alpha-N-acetylglucosaminidase                                               | NAGPA   | Homo sapiens |
| 54187  | N-acetylneuraminic acid synthase                                                                                 | NANS    | Homo sapiens |
| 4676   | nucleosome assembly protein 1-like 4                                                                             | NAP1L4  | Homo sapiens |
| 8774   | N-ethylmaleimide-sensitive factor attachment protein, gamma                                                      | NAPG    | Homo sapiens |
| 4677   | asparaginyl-tRNA synthetase                                                                                      | NARS    | Homo sapiens |
| 4678   | nuclear autoantigenic sperm protein (histone-binding)                                                            | NASP    | Homo sapiens |
| 10     | N-acetyltransferase 2 (arylamine N-acetyltransferase)                                                            | NAT2    | Homo sapiens |
| 9027   | N-acetyltransferase 8 (GCN5-related, putative); N-acetyltransferase 8B (GCN5-related, putative, gene/pseudogene) | NAT8    | Homo sapiens |
| 51471  | N-acetyltransferase 8 (GCN5-related, putative); N-acetyltransferase 8B (GCN5-related, putative, gene/pseudogene) | NAT8    | Homo sapiens |
| 652725 | neuron navigator 3; similar to neuron navigator 3                                                                | NAV3    | Homo sapiens |
| 89795  | neuron navigator 3; similar to neuron navigator 3                                                                | NAV3    | Homo sapiens |
| 4681   | neuroblastoma, suppression of tumorigenicity 1                                                                   | NBL1    | Homo sapiens |
| 4684   | neural cell adhesion molecule 1                                                                                  | NCAM1   | Homo sapiens |
| 4686   | nuclear cap binding protein subunit 1, 80kDa                                                                     | NCBP1   | Homo sapiens |
| 22916  | nuclear cap binding protein subunit 2, 20kDa                                                                     | NCBP2   | Homo sapiens |
| 4688   | neutrophil cytosolic factor 2                                                                                    | NCF2    | Homo sapiens |
| 4689   | neutrophil cytosolic factor 4, 40kDa                                                                             | NCF4    | Homo sapiens |
| 4690   | NCK adaptor protein 1                                                                                            | NCK1    | Homo sapiens |
| 8440   | NCK adaptor protein 2                                                                                            | NCK2    | Homo sapiens |
| 51517  | NCK interacting protein with SH3 domain                                                                          | NCKIPSD | Homo sapiens |
| 4691   | nucleolin                                                                                                        | NCL     | Homo sapiens |
| 8648   | nuclear receptor coactivator 1                                                                                   | NCOA1   | Homo sapiens |
| 10499  | nuclear receptor coactivator 2                                                                                   | NCOA2   | Homo sapiens |
| 8031   | nuclear receptor coactivator 4                                                                                   | NCOA4   | Homo sapiens |
| 9611   | nuclear receptor co-repressor 1                                                                                  | NCOR1   | Homo sapiens |
| 80762  | Nedd4 family interacting protein 1                                                                               | NDFIP1  | Homo sapiens |

|           |                                                                                                                                                      |         |              |
|-----------|------------------------------------------------------------------------------------------------------------------------------------------------------|---------|--------------|
| 4693      | Norrie disease (pseudoglioma)                                                                                                                        | NDP     | Homo sapiens |
| 10397     | N-myc downstream regulated 1                                                                                                                         | NDRG1   | Homo sapiens |
| 8509      | N-deacetylase/N-sulfotransferase (heparan glucosaminyl) 2                                                                                            | NDST2   | Homo sapiens |
| 4694      | NADH dehydrogenase (ubiquinone) 1 alpha subcomplex, 1, 7.5kDa                                                                                        | NDUFA1  | Homo sapiens |
| 4695      | NADH dehydrogenase (ubiquinone) 1 alpha subcomplex, 2, 8kDa                                                                                          | NDUFA2  | Homo sapiens |
| 4696      | NADH dehydrogenase (ubiquinone) 1 alpha subcomplex, 3, 9kDa                                                                                          | NDUFA3  | Homo sapiens |
| 4697      | NADH dehydrogenase (ubiquinone) 1 alpha subcomplex, 4, 9kDa                                                                                          | NDUFA4  | Homo sapiens |
| 4700      | NADH dehydrogenase (ubiquinone) 1 alpha subcomplex, 6, 14kDa                                                                                         | NDUFA6  | Homo sapiens |
| 4701      | NADH dehydrogenase (ubiquinone) 1 alpha subcomplex, 7, 14.5kDa                                                                                       | NDUFA7  | Homo sapiens |
| 4704      | NADH dehydrogenase (ubiquinone) 1 alpha subcomplex, 9, 39kDa                                                                                         | NDUFA9  | Homo sapiens |
| 4706      | NADH dehydrogenase (ubiquinone) 1, alpha/beta subcomplex, 1, 8kDa                                                                                    | NDUFAB1 | Homo sapiens |
| 4707      | NADH dehydrogenase (ubiquinone) 1 beta subcomplex, 1, 7kDa                                                                                           | NDUFB1  | Homo sapiens |
| 4716      | NADH dehydrogenase (ubiquinone) 1 beta subcomplex, 10, 22kDa                                                                                         | NDUFB10 | Homo sapiens |
| 4708      | NADH dehydrogenase (ubiquinone) 1 beta subcomplex, 2, 8kDa                                                                                           | NDUFB2  | Homo sapiens |
| 402175    | hypothetical gene supported by AF044957; NM_004547; NADH dehydrogenase (ubiquinone) 1 beta subcomplex, 4, 15kDa                                      | NDUFB4  | Homo sapiens |
| 4710      | hypothetical gene supported by AF044957; NM_004547; NADH dehydrogenase (ubiquinone) 1 beta subcomplex, 4, 15kDa                                      | NDUFB4  | Homo sapiens |
| 4711      | NADH dehydrogenase (ubiquinone) 1 beta subcomplex, 5, 16kDa                                                                                          | NDUFB5  | Homo sapiens |
| 4712      | NADH dehydrogenase (ubiquinone) 1 beta subcomplex, 6, 17kDa                                                                                          | NDUFB6  | Homo sapiens |
| 4713      | NADH dehydrogenase (ubiquinone) 1 beta subcomplex, 7, 18kDa                                                                                          | NDUFB7  | Homo sapiens |
| 4714      | NADH dehydrogenase (ubiquinone) 1 beta subcomplex, 8, 19kDa                                                                                          | NDUFB8  | Homo sapiens |
| 4718      | NADH dehydrogenase (ubiquinone) 1, subcomplex unknown, 2, 14.5kDa                                                                                    | NDUFC2  | Homo sapiens |
| 4719      | NADH dehydrogenase (ubiquinone) Fe-S protein 1, 75kDa (NADH-coenzyme Q reductase)                                                                    | NDUFS1  | Homo sapiens |
| 4720      | NADH dehydrogenase (ubiquinone) Fe-S protein 2, 49kDa (NADH-coenzyme Q reductase)                                                                    | NDUFS2  | Homo sapiens |
| 4724      | NADH dehydrogenase (ubiquinone) Fe-S protein 4, 18kDa (NADH-coenzyme Q reductase)                                                                    | NDUFS4  | Homo sapiens |
| 4726      | NADH dehydrogenase (ubiquinone) Fe-S protein 6, 13kDa (NADH-coenzyme Q reductase)                                                                    | NDUFS6  | Homo sapiens |
| 4723      | NADH dehydrogenase (ubiquinone) flavoprotein 1, 51kDa                                                                                                | NDUFV1  | Homo sapiens |
| 10529     | nebulin                                                                                                                                              | NEBL    | Homo sapiens |
| 4734      | neural precursor cell expressed, developmentally down-regulated 4                                                                                    | NEDD4   | Homo sapiens |
| 100128775 | neural precursor cell expressed, developmentally down-regulated 8; similar to neural precursor cell expressed, developmentally down-regulated gene 8 | NEDD8   | Homo sapiens |
| 4738      | neural precursor cell expressed, developmentally down-regulated 8; similar to neural precursor cell expressed, developmentally down-regulated gene 8 | NEDD8   | Homo sapiens |
| 4744      | neurofilament, heavy polypeptide                                                                                                                     | NEFH    | Homo sapiens |
| 4751      | NIMA (never in mitosis gene a)-related kinase 2                                                                                                      | NEK2    | Homo sapiens |
| 4752      | NIMA (never in mitosis gene a)-related kinase 3                                                                                                      | NEK3    | Homo sapiens |
| 91754     | NIMA (never in mitosis gene a)- related kinase 9                                                                                                     | NEK9    | Homo sapiens |
| 4753      | NEL-like 2 (chicken)                                                                                                                                 | NELL2   | Homo sapiens |
| 4756      | neogenin homolog 1 (chicken)                                                                                                                         | NEO1    | Homo sapiens |
| 10763     | nestin                                                                                                                                               | NES     | Homo sapiens |

|        |                                                                                                                                              |          |              |
|--------|----------------------------------------------------------------------------------------------------------------------------------------------|----------|--------------|
| 10276  | neuroepithelial cell transforming 1                                                                                                          | NET1     | Homo sapiens |
| 10825  | sialidase 3 (membrane sialidase)                                                                                                             | NEU3     | Homo sapiens |
| 9148   | neuralized homolog (Drosophila)                                                                                                              | NEURL    | Homo sapiens |
| 50674  | neurogenin 3                                                                                                                                 | NEUROG3  | Homo sapiens |
| 4763   | neurofibromin 1                                                                                                                              | NF1      | Homo sapiens |
| 4771   | neurofibromin 2 (merlin)                                                                                                                     | NF2      | Homo sapiens |
| 10725  | nuclear factor of activated T-cells 5, tonicity-responsive                                                                                   | NFAT5    | Homo sapiens |
| 4772   | nuclear factor of activated T-cells, cytoplasmic, calcineurin-dependent 1                                                                    | NFATC1   | Homo sapiens |
| 4773   | nuclear factor of activated T-cells, cytoplasmic, calcineurin-dependent 2                                                                    | NFATC2   | Homo sapiens |
| 4775   | nuclear factor of activated T-cells, cytoplasmic, calcineurin-dependent 3                                                                    | NFATC3   | Homo sapiens |
| 4778   | nuclear factor (erythroid-derived 2), 45kDa                                                                                                  | NFE2     | Homo sapiens |
| 4780   | nuclear factor (erythroid-derived 2)-like 2                                                                                                  | NFE2L2   | Homo sapiens |
| 9603   | nuclear factor (erythroid-derived 2)-like 3                                                                                                  | NFE2L3   | Homo sapiens |
| 4782   | nuclear factor I/C (CCAAT-binding transcription factor)                                                                                      | NFIC     | Homo sapiens |
| 4783   | nuclear factor, interleukin 3 regulated                                                                                                      | NFIL3    | Homo sapiens |
| 4784   | nuclear factor I/X (CCAAT-binding transcription factor)                                                                                      | NFIX     | Homo sapiens |
| 4790   | nuclear factor of kappa light polypeptide gene enhancer in B-cells 1                                                                         | NFKB1    | Homo sapiens |
| 4792   | nuclear factor of kappa light polypeptide gene enhancer in B-cells inhibitor, alpha                                                          | NFKBIA   | Homo sapiens |
| 4794   | nuclear factor of kappa light polypeptide gene enhancer in B-cells inhibitor, epsilon                                                        | NFKBIE   | Homo sapiens |
| 4795   | nuclear factor of kappa light polypeptide gene enhancer in B-cells inhibitor-like 1                                                          | NFKBIL1  | Homo sapiens |
| 4798   | nuclear factor related to kappaB binding protein                                                                                             | NFRKB    | Homo sapiens |
| 4800   | nuclear transcription factor Y, alpha                                                                                                        | NFYA     | Homo sapiens |
| 4802   | nuclear transcription factor Y, gamma                                                                                                        | NFYC     | Homo sapiens |
| 4804   | nerve growth factor receptor (TNFR superfamily, member 16)                                                                                   | NGFR     | Homo sapiens |
| 4807   | nescient helix loop helix 1                                                                                                                  | NHLH1    | Homo sapiens |
| 4809   | NHP2 non-histone chromosome protein 2-like 1 (S. cerevisiae)                                                                                 | NHP2L1   | Homo sapiens |
| 22795  | nidogen 2 (osteonidogen)                                                                                                                     | NID2     | Homo sapiens |
| 4814   | ninjurin 1                                                                                                                                   | NINJ1    | Homo sapiens |
| 25836  | Nipped-B homolog (Drosophila)                                                                                                                | NIPBL    | Homo sapiens |
| 8508   | nipsnap homolog 1 (C. elegans)                                                                                                               | NIPSNAP1 | Homo sapiens |
| 11188  | nischarin                                                                                                                                    | NISCH    | Homo sapiens |
| 4817   | nitrilase 1                                                                                                                                  | NIT1     | Homo sapiens |
| 4818   | natural killer cell group 7 sequence                                                                                                         | NKG7     | Homo sapiens |
| 4820   | natural killer-tumor recognition sequence                                                                                                    | NKTR     | Homo sapiens |
| 4828   | neuromedin B                                                                                                                                 | NMB      | Homo sapiens |
| 654364 | non-metastatic cells 1, protein (NM23A) expressed in; NME1-NME2 readthrough transcript; non-metastatic cells 2, protein (NM23B) expressed in | NME1     | Homo sapiens |
| 4830   | non-metastatic cells 1, protein (NM23A) expressed in; NME1-NME2 readthrough transcript; non-metastatic cells 2, protein (NM23B) expressed in | NME1     | Homo sapiens |
| 4831   | non-metastatic cells 1, protein (NM23A) expressed in; NME1-NME2                                                                              | NME1     | Homo sapiens |



|           |                                                                                                                                                                                       |        |              |
|-----------|---------------------------------------------------------------------------------------------------------------------------------------------------------------------------------------|--------|--------------|
|           | readthrough transcript; non-metastatic cells 2, protein (NM23B) expressed in                                                                                                          |        |              |
| 4832      | non-metastatic cells 3, protein expressed in                                                                                                                                          | NME3   | Homo sapiens |
| 4833      | non-metastatic cells 4, protein expressed in                                                                                                                                          | NME4   | Homo sapiens |
| 8382      | non-metastatic cells 5, protein expressed in (nucleoside-diphosphate kinase)                                                                                                          | NME5   | Homo sapiens |
| 10201     | non-metastatic cells 6, protein expressed in (nucleoside-diphosphate kinase)                                                                                                          | NME6   | Homo sapiens |
| 29922     | non-metastatic cells 7, protein expressed in (nucleoside-diphosphate kinase)                                                                                                          | NME7   | Homo sapiens |
| 9111      | N-myc (and STAT) interactor                                                                                                                                                           | NMI    | Homo sapiens |
| 4836      | N-myristoyltransferase 1                                                                                                                                                              | NMT1   | Homo sapiens |
| 10874     | neuromedin U                                                                                                                                                                          | NMU    | Homo sapiens |
| 4826      | neuronatin                                                                                                                                                                            | NNAT   | Homo sapiens |
| 4837      | nicotinamide N-methyltransferase                                                                                                                                                      | NNMT   | Homo sapiens |
| 23530     | nicotinamide nucleotide transhydrogenase                                                                                                                                              | NNT    | Homo sapiens |
| 8715      | nucleolar protein 4                                                                                                                                                                   | NOL4   | Homo sapiens |
| 51406     | nucleolar protein 7, 27kDa                                                                                                                                                            | NOL7   | Homo sapiens |
| 9221      | nucleolar and coiled-body phosphoprotein 1                                                                                                                                            | NOLC1  | Homo sapiens |
| 4841      | non-POU domain containing, octamer-binding                                                                                                                                            | NONO   | Homo sapiens |
| 4842      | nitric oxide synthase 1 (neuronal)                                                                                                                                                    | NOS1   | Homo sapiens |
| 4853      | Notch homolog 2 (Drosophila)                                                                                                                                                          | NOTCH2 | Homo sapiens |
| 4854      | Notch homolog 3 (Drosophila)                                                                                                                                                          | NOTCH3 | Homo sapiens |
| 4855      | Notch homolog 4 (Drosophila)                                                                                                                                                          | NOTCH4 | Homo sapiens |
| 4856      | nephroblastoma overexpressed gene                                                                                                                                                     | NOV    | Homo sapiens |
| 50507     | NADPH oxidase 4                                                                                                                                                                       | NOX4   | Homo sapiens |
| 4862      | neuronal PAS domain protein 2                                                                                                                                                         | NPAS2  | Homo sapiens |
| 64067     | neuronal PAS domain protein 3                                                                                                                                                         | NPAS3  | Homo sapiens |
| 4864      | Niemann-Pick disease, type C1                                                                                                                                                         | NPC1   | Homo sapiens |
| 8620      | neuropeptide FF-amide peptide precursor                                                                                                                                               | NPFF   | Homo sapiens |
| 4867      | nephronophthisis 1 (juvenile)                                                                                                                                                         | NPHP1  | Homo sapiens |
| 4868      | nephrosis 1, congenital, Finnish type (nephrin)                                                                                                                                       | NPHS1  | Homo sapiens |
| 729686    | nucleophosmin 1 (nucleolar phosphoprotein B23, numatrin) pseudogene 21; hypothetical LOC100131044; similar to nucleophosmin 1; nucleophosmin (nucleolar phosphoprotein B23, numatrin) | NPM1   | Homo sapiens |
| 4869      | nucleophosmin 1 (nucleolar phosphoprotein B23, numatrin) pseudogene 21; hypothetical LOC100131044; similar to nucleophosmin 1; nucleophosmin (nucleolar phosphoprotein B23, numatrin) | NPM1   | Homo sapiens |
| 399804    | nucleophosmin 1 (nucleolar phosphoprotein B23, numatrin) pseudogene 21; hypothetical LOC100131044; similar to nucleophosmin 1; nucleophosmin (nucleolar phosphoprotein B23, numatrin) | NPM1   | Homo sapiens |
| 100131044 | nucleophosmin 1 (nucleolar phosphoprotein B23, numatrin) pseudogene 21; hypothetical LOC100131044; similar to nucleophosmin 1; nucleophosmin (nucleolar phosphoprotein B23, numatrin) | NPM1   | Homo sapiens |
| 729342    | nucleophosmin 1 (nucleolar phosphoprotein B23, numatrin)                                                                                                                              | NPM1   | Homo sapiens |

|           |                                                                                                                                                                                          |       |              |
|-----------|------------------------------------------------------------------------------------------------------------------------------------------------------------------------------------------|-------|--------------|
|           | pseudogene 21; hypothetical LOC100131044; similar to nucleophosmin 1; nucleophosmin (nucleolar phosphoprotein B23, numatrin)                                                             |       |              |
| 440577    | nucleophosmin 1 (nucleolar phosphoprotein B23, numatrin)<br>pseudogene 21; hypothetical LOC100131044; similar to nucleophosmin 1; nucleophosmin (nucleolar phosphoprotein B23, numatrin) | NPM1  | Homo sapiens |
| 100129237 | nucleophosmin 1 (nucleolar phosphoprotein B23, numatrin)<br>pseudogene 21; hypothetical LOC100131044; similar to nucleophosmin 1; nucleophosmin (nucleolar phosphoprotein B23, numatrin) | NPM1  | Homo sapiens |
| 4879      | natriuretic peptide precursor B                                                                                                                                                          | NPPB  | Homo sapiens |
| 4881      | natriuretic peptide receptor A/guanylate cyclase A (atrionatriuretic peptide receptor A)                                                                                                 | NPR1  | Homo sapiens |
| 4882      | natriuretic peptide receptor B/guanylate cyclase B (atrionatriuretic peptide receptor B)                                                                                                 | NPR2  | Homo sapiens |
| 4883      | natriuretic peptide receptor C/guanylate cyclase C (atrionatriuretic peptide receptor C)                                                                                                 | NPR3  | Homo sapiens |
| 4885      | neuronal pentraxin II                                                                                                                                                                    | NPTX2 | Homo sapiens |
| 23467     | neuronal pentraxin receptor                                                                                                                                                              | NPTXR | Homo sapiens |
| 4886      | neuropeptide Y receptor Y1                                                                                                                                                               | NPY1R | Homo sapiens |
| 1728      | NAD(P)H dehydrogenase, quinone 1                                                                                                                                                         | NQO1  | Homo sapiens |
| 190       | nuclear receptor subfamily 0, group B, member 1                                                                                                                                          | NR0B1 | Homo sapiens |
| 8431      | nuclear receptor subfamily 0, group B, member 2                                                                                                                                          | NR0B2 | Homo sapiens |
| 9572      | nuclear receptor subfamily 1, group D, member 1                                                                                                                                          | NR1D1 | Homo sapiens |
| 7376      | nuclear receptor subfamily 1, group H, member 2                                                                                                                                          | NR1H2 | Homo sapiens |
| 10062     | nuclear receptor subfamily 1, group H, member 3                                                                                                                                          | NR1H3 | Homo sapiens |
| 9971      | nuclear receptor subfamily 1, group H, member 4                                                                                                                                          | NR1H4 | Homo sapiens |
| 8856      | nuclear receptor subfamily 1, group I, member 2                                                                                                                                          | NR1I2 | Homo sapiens |
| 7181      | nuclear receptor subfamily 2, group C, member 1                                                                                                                                          | NR2C1 | Homo sapiens |
| 7182      | nuclear receptor subfamily 2, group C, member 2                                                                                                                                          | NR2C2 | Homo sapiens |
| 7025      | nuclear receptor subfamily 2, group F, member 1                                                                                                                                          | NR2F1 | Homo sapiens |
| 2063      | nuclear receptor subfamily 2, group F, member 6                                                                                                                                          | NR2F6 | Homo sapiens |
| 2908      | nuclear receptor subfamily 3, group C, member 1 (glucocorticoid receptor)                                                                                                                | NR3C1 | Homo sapiens |
| 4306      | nuclear receptor subfamily 3, group C, member 2                                                                                                                                          | NR3C2 | Homo sapiens |
| 3164      | nuclear receptor subfamily 4, group A, member 1                                                                                                                                          | NR4A1 | Homo sapiens |
| 4929      | nuclear receptor subfamily 4, group A, member 2                                                                                                                                          | NR4A2 | Homo sapiens |
| 8013      | nuclear receptor subfamily 4, group A, member 3                                                                                                                                          | NR4A3 | Homo sapiens |
| 4893      | neuroblastoma RAS viral (v-ras) oncogene homolog                                                                                                                                         | NRAS  | Homo sapiens |
| 4897      | neuronal cell adhesion molecule                                                                                                                                                          | NRCAM | Homo sapiens |
| 4898      | nardilysin (N-arginine dibasic convertase)                                                                                                                                               | NRD1  | Homo sapiens |
| 4899      | nuclear respiratory factor 1                                                                                                                                                             | NRF1  | Homo sapiens |
| 3084      | neuregulin 1                                                                                                                                                                             | NRG1  | Homo sapiens |
| 4900      | neurogranin (protein kinase C substrate, RC3)                                                                                                                                            | NRGN  | Homo sapiens |
| 4901      | neural retina leucine zipper                                                                                                                                                             | NRL   | Homo sapiens |
| 8829      | neuropilin 1                                                                                                                                                                             | NRP1  | Homo sapiens |
| 8828      | neuropilin 2                                                                                                                                                                             | NRP2  | Homo sapiens |

|        |                                                                                                                          |         |              |
|--------|--------------------------------------------------------------------------------------------------------------------------|---------|--------------|
| 9378   | neurexin 1                                                                                                               | NRXN1   | Homo sapiens |
| 9369   | neurexin 3                                                                                                               | NRXN3   | Homo sapiens |
| 50814  | NAD(P) dependent steroid dehydrogenase-like                                                                              | NSDHL   | Homo sapiens |
| 4905   | N-ethylmaleimide-sensitive factor                                                                                        | NSF     | Homo sapiens |
| 55968  | NSFL1 (p97) cofactor (p47)                                                                                               | NSFL1C  | Homo sapiens |
| 8439   | neutral sphingomyelinase (N-SMase) activation associated factor                                                          | NSMAF   | Homo sapiens |
| 22978  | 5'-nucleotidase, cytosolic II                                                                                            | NT5C2   | Homo sapiens |
| 51251  | 5'-nucleotidase, cytosolic III                                                                                           | NT5C3   | Homo sapiens |
| 4907   | 5'-nucleotidase, ecto (CD73)                                                                                             | NT5E    | Homo sapiens |
| 4913   | nth endonuclease III-like 1 (E. coli)                                                                                    | NTHL1   | Homo sapiens |
| 9423   | netrin 1                                                                                                                 | NTN1    | Homo sapiens |
| 4914   | neurotrophic tyrosine kinase, receptor, type 1                                                                           | NTRK1   | Homo sapiens |
| 4915   | neurotrophic tyrosine kinase, receptor, type 2                                                                           | NTRK2   | Homo sapiens |
| 4922   | neurotensin                                                                                                              | NTS     | Homo sapiens |
| 23620  | neurotensin receptor 2                                                                                                   | NTSR2   | Homo sapiens |
| 4682   | nucleotide binding protein 1 (MinD homolog, E. coli)                                                                     | NUBP1   | Homo sapiens |
| 4925   | nucleobindin 2                                                                                                           | NUCB2   | Homo sapiens |
| 4521   | nudix (nucleoside diphosphate linked moiety X)-type motif 1                                                              | NUDT1   | Homo sapiens |
| 11164  | nudix (nucleoside diphosphate linked moiety X)-type motif 5                                                              | NUDT5   | Homo sapiens |
| 26747  | nuclear fragile X mental retardation protein interacting protein 1                                                       | NUFIP1  | Homo sapiens |
| 4926   | nuclear mitotic apparatus protein 1                                                                                      | NUMA1   | Homo sapiens |
| 8650   | numb homolog (Drosophila)                                                                                                | NUMB    | Homo sapiens |
| 9972   | nucleoporin 153kDa                                                                                                       | NUP153  | Homo sapiens |
| 9631   | nucleoporin 155kDa                                                                                                       | NUP155  | Homo sapiens |
| 8021   | nucleoporin 214kDa                                                                                                       | NUP214  | Homo sapiens |
| 23636  | nucleoporin 62kDa                                                                                                        | NUP62   | Homo sapiens |
| 4927   | nucleoporin 88kDa                                                                                                        | NUP88   | Homo sapiens |
| 4928   | nucleoporin 98kDa                                                                                                        | NUP98   | Homo sapiens |
| 11097  | nucleoporin like 2                                                                                                       | NUPL2   | Homo sapiens |
| 55916  | nuclear transport factor 2-like export factor 2                                                                          | NXT2    | Homo sapiens |
| 4938   | 2',5'-oligoadenylate synthetase 1, 40/46kDa                                                                              | OAS1    | Homo sapiens |
| 4942   | ornithine aminotransferase (gyrate atrophy)                                                                              | OAT     | Homo sapiens |
| 4947   | ornithine decarboxylase antizyme 2                                                                                       | OAZ2    | Homo sapiens |
| 4948   | oculocutaneous albinism II                                                                                               | OCA2    | Homo sapiens |
| 4953   | ornithine decarboxylase 1                                                                                                | ODC1    | Homo sapiens |
| 4956   | outer dense fiber of sperm tails 1                                                                                       | ODF1    | Homo sapiens |
| 4957   | outer dense fiber of sperm tails 2                                                                                       | ODF2    | Homo sapiens |
| 8481   | oral-facial-digital syndrome 1                                                                                           | OFD1    | Homo sapiens |
| 11054  | opioid growth factor receptor                                                                                            | OGFR    | Homo sapiens |
| 8473   | O-linked N-acetylglucosamine (GlcNAc) transferase (UDP-N-acetylglucosamine:polypeptide-N-acetylglucosaminyl transferase) | OGT     | Homo sapiens |
| 10439  | olfactomedin 1                                                                                                           | OLFM1   | Homo sapiens |
| 10562  | olfactomedin 4                                                                                                           | OLFM4   | Homo sapiens |
| 283298 | olfactomedin-like 1                                                                                                      | OLFML1  | Homo sapiens |
| 169611 | olfactomedin-like 2A                                                                                                     | OLFML2A | Homo sapiens |
| 10215  | oligodendrocyte lineage transcription factor 2                                                                           | OLIG2   | Homo sapiens |

|        |                                                                                           |         |              |
|--------|-------------------------------------------------------------------------------------------|---------|--------------|
| 4973   | oxidized low density lipoprotein (lectin-like) receptor 1                                 | OLR1    | Homo sapiens |
| 4974   | oligodendrocyte myelin glycoprotein                                                       | OMG     | Homo sapiens |
| 3175   | one cut homeobox 1                                                                        | ONECUT1 | Homo sapiens |
| 9480   | one cut homeobox 2                                                                        | ONECUT2 | Homo sapiens |
| 4976   | optic atrophy 1 (autosomal dominant)                                                      | OPA1    | Homo sapiens |
| 4978   | opioid binding protein/cell adhesion molecule-like                                        | OPCML   | Homo sapiens |
| 4986   | opioid receptor, kappa 1                                                                  | OPRK1   | Homo sapiens |
| 10133  | optineurin                                                                                | OPTN    | Homo sapiens |
| 23595  | origin recognition complex, subunit 3-like (yeast)                                        | ORC3L   | Homo sapiens |
| 5000   | origin recognition complex, subunit 4-like (yeast)                                        | ORC4L   | Homo sapiens |
| 5001   | origin recognition complex, subunit 5-like (yeast)                                        | ORC5L   | Homo sapiens |
| 29095  | ORM1-like 2 ( <i>S. cerevisiae</i> )                                                      | ORMDL2  | Homo sapiens |
| 94103  | ORM1-like 3 ( <i>S. cerevisiae</i> )                                                      | ORMDL3  | Homo sapiens |
| 5007   | oxysterol binding protein                                                                 | OSBP    | Homo sapiens |
| 114884 | oxysterol binding protein-like 10                                                         | OSBPL10 | Homo sapiens |
| 114885 | oxysterol binding protein-like 11                                                         | OSBPL11 | Homo sapiens |
| 9885   | oxysterol binding protein-like 2                                                          | OSBPL2  | Homo sapiens |
| 26031  | oxysterol binding protein-like 3                                                          | OSBPL3  | Homo sapiens |
| 114880 | oxysterol binding protein-like 6                                                          | OSBPL6  | Homo sapiens |
| 114882 | oxysterol binding protein-like 8                                                          | OSBPL8  | Homo sapiens |
| 114883 | oxysterol binding protein-like 9                                                          | OSBPL9  | Homo sapiens |
| 55644  | O-sialoglycoprotein endopeptidase                                                         | OSGEP   | Homo sapiens |
| 9180   | oncostatin M receptor                                                                     | OSMR    | Homo sapiens |
| 26578  | osteoclast stimulating factor 1                                                           | OSTF1   | Homo sapiens |
| 5009   | ornithine carbamoyltransferase                                                            | OTC     | Homo sapiens |
| 23440  | orthopedia homeobox                                                                       | OTP     | Homo sapiens |
| 55611  | OTU domain, ubiquitin aldehyde binding 1                                                  | OTUB1   | Homo sapiens |
| 5018   | oxidase (cytochrome c) assembly 1-like                                                    | OXA1L   | Homo sapiens |
| 5019   | 3-oxoacid CoA transferase 1                                                               | OXCT1   | Homo sapiens |
| 5023   | purinergic receptor P2X, ligand-gated ion channel, 1                                      | P2RX1   | Homo sapiens |
| 5025   | purinergic receptor P2X, ligand-gated ion channel, 4                                      | P2RX4   | Homo sapiens |
| 5026   | purinergic receptor P2X, ligand-gated ion channel, 5                                      | P2RX5   | Homo sapiens |
| 27334  | purinergic receptor P2Y, G-protein coupled, 10                                            | P2RY10  | Homo sapiens |
| 5029   | purinergic receptor P2Y, G-protein coupled, 2                                             | P2RY2   | Homo sapiens |
| 5033   | prolyl 4-hydroxylase, alpha polypeptide I                                                 | P4HA1   | Homo sapiens |
| 8974   | prolyl 4-hydroxylase, alpha polypeptide II                                                | P4HA2   | Homo sapiens |
| 5034   | prolyl 4-hydroxylase, beta polypeptide                                                    | P4HB    | Homo sapiens |
| 647033 | proliferation-associated 2G4, 38kDa; proliferation-associated 2G4 pseudogene 4            | PA2G4   | Homo sapiens |
| 5036   | proliferation-associated 2G4, 38kDa; proliferation-associated 2G4 pseudogene 4            | PA2G4   | Homo sapiens |
| 341315 | poly(A) binding protein, cytoplasmic pseudogene 5; poly(A) binding protein, cytoplasmic 1 | PABPC1  | Homo sapiens |
| 26986  | poly(A) binding protein, cytoplasmic pseudogene 5; poly(A) binding protein, cytoplasmic 1 | PABPC1  | Homo sapiens |
| 5042   | poly(A) binding protein, cytoplasmic 3                                                    | PABPC3  | Homo sapiens |
| 8106   | poly(A) binding protein, nuclear 1                                                        | PABPN1  | Homo sapiens |

|        |                                                                                                      |          |              |
|--------|------------------------------------------------------------------------------------------------------|----------|--------------|
| 11240  | peptidyl arginine deiminase, type II                                                                 | PADI2    | Homo sapiens |
| 5047   | progesterone-associated endometrial protein                                                          | PAEP     | Homo sapiens |
| 5048   | platelet-activating factor acetylhydrolase, isoform Ib, subunit 1 (45kDa)                            | PAFAH1B1 | Homo sapiens |
| 5050   | platelet-activating factor acetylhydrolase, isoform Ib, subunit 3 (29kDa)                            | PAFAH1B3 | Homo sapiens |
| 5053   | phenylalanine hydroxylase                                                                            | PAH      | Homo sapiens |
| 10606  | phosphoribosylaminoimidazole carboxylase, phosphoribosylaminoimidazole succinocarboxamide synthetase | PAICS    | Homo sapiens |
| 51247  | poly(A) binding protein interacting protein 2                                                        | PAIP2    | Homo sapiens |
| 5058   | p21 protein (Cdc42/Rac)-activated kinase 1                                                           | PAK1     | Homo sapiens |
| 5062   | p21 protein (Cdc42/Rac)-activated kinase 2                                                           | PAK2     | Homo sapiens |
| 5063   | p21 protein (Cdc42/Rac)-activated kinase 3                                                           | PAK3     | Homo sapiens |
| 5064   | paralemmin                                                                                           | PALM     | Homo sapiens |
| 5066   | peptidylglycine alpha-amidating monooxygenase                                                        | PAM      | Homo sapiens |
| 53354  | pantothenate kinase 1                                                                                | PANK1    | Homo sapiens |
| 80025  | pantothenate kinase 2                                                                                | PANK2    | Homo sapiens |
| 24145  | pannexin 1                                                                                           | PANX1    | Homo sapiens |
| 10914  | poly(A) polymerase alpha                                                                             | PAPOLA   | Homo sapiens |
| 493913 | PAPPA antisense RNA (non-protein coding); pregnancy-associated plasma protein A, pappalysin 1        | PAPPA    | Homo sapiens |
| 5069   | PAPPA antisense RNA (non-protein coding); pregnancy-associated plasma protein A, pappalysin 1        | PAPPA    | Homo sapiens |
| 9061   | 3'-phosphoadenosine 5'-phosphosulfate synthase 1                                                     | PAPSS1   | Homo sapiens |
| 50855  | par-6 partitioning defective 6 homolog alpha (C. elegans)                                            | PARD6A   | Homo sapiens |
| 142    | poly (ADP-ribose) polymerase 1                                                                       | PARP1    | Homo sapiens |
| 10038  | poly (ADP-ribose) polymerase 2                                                                       | PARP2    | Homo sapiens |
| 29780  | parvin, beta                                                                                         | PARVB    | Homo sapiens |
| 23178  | PAS domain containing serine/threonine kinase                                                        | PASK     | Homo sapiens |
| 5074   | PRKC, apoptosis, WT1, regulator                                                                      | PAWR     | Homo sapiens |
| 5075   | paired box 1                                                                                         | PAX1     | Homo sapiens |
| 5076   | paired box 2                                                                                         | PAX2     | Homo sapiens |
| 5077   | paired box 3                                                                                         | PAX3     | Homo sapiens |
| 7849   | paired box 8                                                                                         | PAX8     | Homo sapiens |
| 5083   | paired box 9                                                                                         | PAX9     | Homo sapiens |
| 5087   | pre-B-cell leukemia homeobox 1                                                                       | PBX1     | Homo sapiens |
| 57326  | pre-B-cell leukemia homeobox interacting protein 1                                                   | PBXIP1   | Homo sapiens |
| 5093   | poly(rC) binding protein 1                                                                           | PCBP1    | Homo sapiens |
| 5094   | poly(rC) binding protein 2                                                                           | PCBP2    | Homo sapiens |
| 5095   | propionyl Coenzyme A carboxylase, alpha polypeptide                                                  | PCCA     | Homo sapiens |
| 5096   | propionyl Coenzyme A carboxylase, beta polypeptide                                                   | PCCB     | Homo sapiens |
| 5097   | protocadherin 1                                                                                      | PCDH1    | Homo sapiens |
| 27328  | protocadherin 11 X-linked                                                                            | PCDH11X  | Homo sapiens |
| 51294  | protocadherin 12                                                                                     | PCDH12   | Homo sapiens |
| 5100   | protocadherin 8                                                                                      | PCDH8    | Homo sapiens |
| 56127  | protocadherin beta 10; protocadherin beta 9                                                          | PCDHB10  | Homo sapiens |
| 56126  | protocadherin beta 10; protocadherin beta 9                                                          | PCDHB10  | Homo sapiens |

|           |                                                                                                                                                                         |         |              |
|-----------|-------------------------------------------------------------------------------------------------------------------------------------------------------------------------|---------|--------------|
| 5106      | phosphoenolpyruvate carboxykinase 2 (mitochondrial)                                                                                                                     | PCK2    | Homo sapiens |
| 5108      | pericentriolar material 1                                                                                                                                               | PCM1    | Homo sapiens |
| 5110      | protein-L-isoaspartate (D-aspartate) O-methyltransferase                                                                                                                | PCMT1   | Homo sapiens |
| 5111      | proliferating cell nuclear antigen                                                                                                                                      | PCNA    | Homo sapiens |
| 22990     | pecanex homolog (Drosophila)                                                                                                                                            | PCNX    | Homo sapiens |
| 5118      | procollagen C-endopeptidase enhancer                                                                                                                                    | PCOLCE  | Homo sapiens |
| 26577     | procollagen C-endopeptidase enhancer 2                                                                                                                                  | PCOLCE2 | Homo sapiens |
| 5121      | Purkinje cell protein 4                                                                                                                                                 | PCP4    | Homo sapiens |
| 5122      | proprotein convertase subtilisin/kexin type 1                                                                                                                           | PCSK1   | Homo sapiens |
| 5126      | proprotein convertase subtilisin/kexin type 2                                                                                                                           | PCSK2   | Homo sapiens |
| 5125      | proprotein convertase subtilisin/kexin type 5                                                                                                                           | PCSK5   | Homo sapiens |
| 5046      | proprotein convertase subtilisin/kexin type 6                                                                                                                           | PCSK6   | Homo sapiens |
| 5130      | phosphate cytidyltransferase 1, choline, alpha                                                                                                                          | PCYT1A  | Homo sapiens |
| 9468      | phosphate cytidyltransferase 1, choline, beta                                                                                                                           | PCYT1B  | Homo sapiens |
| 645181    | PDGFA associated protein 1; similar to PDGFA associated protein 1                                                                                                       | PDAP1   | Homo sapiens |
| 11333     | PDGFA associated protein 1; similar to PDGFA associated protein 1                                                                                                       | PDAP1   | Homo sapiens |
| 11235     | programmed cell death 10                                                                                                                                                | PDCD10  | Homo sapiens |
| 27250     | programmed cell death 4 (neoplastic transformation inhibitor)                                                                                                           | PDCD4   | Homo sapiens |
| 9141      | programmed cell death 5                                                                                                                                                 | PDCD5   | Homo sapiens |
| 57491     | aryl-hydrocarbon receptor repressor; programmed cell death 6                                                                                                            | PDCD6   | Homo sapiens |
| 10016     | aryl-hydrocarbon receptor repressor; programmed cell death 6                                                                                                            | PDCD6   | Homo sapiens |
| 10846     | phosphodiesterase 10A                                                                                                                                                   | PDE10A  | Homo sapiens |
| 50940     | phosphodiesterase 11A                                                                                                                                                   | PDE11A  | Homo sapiens |
| 5136      | phosphodiesterase 1A, calmodulin-dependent                                                                                                                              | PDE1A   | Homo sapiens |
| 5137      | phosphodiesterase 1C, calmodulin-dependent 70kDa                                                                                                                        | PDE1C   | Homo sapiens |
| 5138      | phosphodiesterase 2A, cGMP-stimulated                                                                                                                                   | PDE2A   | Homo sapiens |
| 5140      | phosphodiesterase 3B, cGMP-inhibited                                                                                                                                    | PDE3B   | Homo sapiens |
| 5141      | phosphodiesterase 4A, cAMP-specific (phosphodiesterase E2 dunce homolog, Drosophila)                                                                                    | PDE4A   | Homo sapiens |
| 5144      | phosphodiesterase 4D, cAMP-specific (phosphodiesterase E3 dunce homolog, Drosophila)                                                                                    | PDE4D   | Homo sapiens |
| 652164    | hypothetical protein LOC100134230; similar to KIAA0454 protein; similar to phosphodiesterase 4D interacting protein isoform 2; phosphodiesterase 4D interacting protein | PDE4DIP | Homo sapiens |
| 100134230 | hypothetical protein LOC100134230; similar to KIAA0454 protein; similar to phosphodiesterase 4D interacting protein isoform 2; phosphodiesterase 4D interacting protein | PDE4DIP | Homo sapiens |
| 727927    | hypothetical protein LOC100134230; similar to KIAA0454 protein; similar to phosphodiesterase 4D interacting protein isoform 2; phosphodiesterase 4D interacting protein | PDE4DIP | Homo sapiens |
| 9659      | hypothetical protein LOC100134230; similar to KIAA0454 protein; similar to phosphodiesterase 4D interacting protein isoform 2; phosphodiesterase 4D interacting protein | PDE4DIP | Homo sapiens |
| 8654      | phosphodiesterase 5A, cGMP-specific                                                                                                                                     | PDE5A   | Homo sapiens |
| 5145      | phosphodiesterase 6A, cGMP-specific, rod, alpha                                                                                                                         | PDE6A   | Homo sapiens |
| 5147      | phosphodiesterase 6D, cGMP-specific, rod, delta                                                                                                                         | PDE6D   | Homo sapiens |
| 5151      | phosphodiesterase 8A                                                                                                                                                    | PDE8A   | Homo sapiens |
| 8622      | phosphodiesterase 8B                                                                                                                                                    | PDE8B   | Homo sapiens |

|       |                                                            |         |              |
|-------|------------------------------------------------------------|---------|--------------|
| 5152  | phosphodiesterase 9A                                       | PDE9A   | Homo sapiens |
| 56034 | platelet derived growth factor C                           | PDGFC   | Homo sapiens |
| 5156  | platelet-derived growth factor receptor, alpha polypeptide | PDGFRA  | Homo sapiens |
| 5157  | platelet-derived growth factor receptor-like               | PDGFRL  | Homo sapiens |
| 5160  | pyruvate dehydrogenase (lipoamide) alpha 1                 | PDHA1   | Homo sapiens |
| 5161  | pyruvate dehydrogenase (lipoamide) alpha 2                 | PDHA2   | Homo sapiens |
| 5163  | pyruvate dehydrogenase kinase, isozyme 1                   | PDK1    | Homo sapiens |
| 5164  | pyruvate dehydrogenase kinase, isozyme 2                   | PDK2    | Homo sapiens |
| 5165  | pyruvate dehydrogenase kinase, isozyme 3                   | PDK3    | Homo sapiens |
| 5166  | pyruvate dehydrogenase kinase, isozyme 4                   | PDK4    | Homo sapiens |
| 27295 | PDZ and LIM domain 3                                       | PDLIM3  | Homo sapiens |
| 8572  | PDZ and LIM domain 4                                       | PDLIM4  | Homo sapiens |
| 5173  | prodynorphin                                               | PDYN    | Homo sapiens |
| 8682  | phosphoprotein enriched in astrocytes 15                   | PEA15   | Homo sapiens |
| 5175  | platelet/endothelial cell adhesion molecule                | PECAM1  | Homo sapiens |
| 57162 | pellino homolog 1 (Drosophila)                             | PELI1   | Homo sapiens |
| 10400 | phosphatidylethanolamine N-methyltransferase               | PEMT    | Homo sapiens |
| 5179  | proenkephalin                                              | PENK    | Homo sapiens |
| 5184  | peptidase D                                                | PEPD    | Homo sapiens |
| 5187  | period homolog 1 (Drosophila)                              | PER1    | Homo sapiens |
| 8864  | period homolog 2 (Drosophila)                              | PER2    | Homo sapiens |
| 64065 | PERP, TP53 apoptosis effector                              | PERP    | Homo sapiens |
| 23481 | pescadillo homolog 1, containing BRCT domain (zebrafish)   | PES1    | Homo sapiens |
| 5188  | PET112-like (yeast)                                        | PET112L | Homo sapiens |
| 5189  | peroxisomal biogenesis factor 1                            | PEX1    | Homo sapiens |
| 8800  | peroxisomal biogenesis factor 11 alpha                     | PEX11A  | Homo sapiens |
| 8799  | peroxisomal biogenesis factor 11 beta                      | PEX11B  | Homo sapiens |
| 5193  | peroxisomal biogenesis factor 12                           | PEX12   | Homo sapiens |
| 5194  | peroxisomal biogenesis factor 13                           | PEX13   | Homo sapiens |
| 5195  | peroxisomal biogenesis factor 14                           | PEX14   | Homo sapiens |
| 5824  | peroxisomal biogenesis factor 19                           | PEX19   | Homo sapiens |
| 5830  | peroxisomal biogenesis factor 5                            | PEX5    | Homo sapiens |
| 5190  | peroxisomal biogenesis factor 6                            | PEX6    | Homo sapiens |
| 5191  | peroxisomal biogenesis factor 7                            | PEX7    | Homo sapiens |
| 5196  | platelet factor 4                                          | PF4     | Homo sapiens |
| 5198  | phosphoribosylformylglycinamide synthase                   | PFAS    | Homo sapiens |
| 5207  | 6-phosphofructo-2-kinase/fructose-2,6-biphosphatase 1      | PFKFB1  | Homo sapiens |
| 5208  | 6-phosphofructo-2-kinase/fructose-2,6-biphosphatase 2      | PFKFB2  | Homo sapiens |
| 5210  | 6-phosphofructo-2-kinase/fructose-2,6-biphosphatase 4      | PFKFB4  | Homo sapiens |
| 5213  | phosphofructokinase, muscle                                | PFKM    | Homo sapiens |
| 5214  | phosphofructokinase, platelet                              | PFKP    | Homo sapiens |
| 5216  | profilin 1                                                 | PFN1    | Homo sapiens |
| 5224  | phosphoglycerate mutase 2 (muscle)                         | PGAM2   | Homo sapiens |
| 5225  | progastricsin (pepsinogen C)                               | PGC     | Homo sapiens |
| 5226  | phosphogluconate dehydrogenase                             | PGD     | Homo sapiens |
| 5228  | placental growth factor                                    | PGF     | Homo sapiens |

|        |                                                                                    |         |              |
|--------|------------------------------------------------------------------------------------|---------|--------------|
| 5229   | protein geranylgeranyltransferase type I, beta subunit                             | PGGT1B  | Homo sapiens |
| 5230   | phosphoglycerate kinase 1                                                          | PGK1    | Homo sapiens |
| 25796  | 6-phosphogluconolactonase                                                          | PGLS    | Homo sapiens |
| 5236   | phosphoglucomutase 1                                                               | PGM1    | Homo sapiens |
| 55276  | phosphoglucomutase 2                                                               | PGM2    | Homo sapiens |
| 5239   | phosphoglucomutase 5                                                               | PGM5    | Homo sapiens |
| 5241   | progesterone receptor                                                              | PGR     | Homo sapiens |
| 10857  | progesterone receptor membrane component 1                                         | PGRMC1  | Homo sapiens |
| 10424  | progesterone receptor membrane component 2                                         | PGRMC2  | Homo sapiens |
| 5245   | prohibitin                                                                         | PHB     | Homo sapiens |
| 1912   | polyhomeotic homolog 2 (Drosophila)                                                | PHC2    | Homo sapiens |
| 5252   | PHD finger protein 1                                                               | PHF1    | Homo sapiens |
| 9678   | PHD finger protein 14                                                              | PHF14   | Homo sapiens |
| 5253   | PHD finger protein 2                                                               | PHF2    | Homo sapiens |
| 23469  | PHD finger protein 3                                                               | PHF3    | Homo sapiens |
| 55023  | pleckstrin homology domain interacting protein                                     | PHIP    | Homo sapiens |
| 646780 | phosphorylase kinase, alpha 1 pseudogene 1; phosphorylase kinase, alpha 1 (muscle) | PHKA1   | Homo sapiens |
| 5255   | phosphorylase kinase, alpha 1 pseudogene 1; phosphorylase kinase, alpha 1 (muscle) | PHKA1   | Homo sapiens |
| 5256   | phosphorylase kinase, alpha 2 (liver)                                              | PHKA2   | Homo sapiens |
| 5257   | phosphorylase kinase, beta                                                         | PHKB    | Homo sapiens |
| 5261   | phosphorylase kinase, gamma 2 (testis)                                             | PHKG2   | Homo sapiens |
| 7262   | pleckstrin homology-like domain, family A, member 2                                | PHLDA2  | Homo sapiens |
| 23612  | pleckstrin homology-like domain, family A, member 3                                | PHLDA3  | Homo sapiens |
| 8929   | paired-like homeobox 2b                                                            | PHOX2B  | Homo sapiens |
| 10745  | putative homeodomain transcription factor 1                                        | PHTF1   | Homo sapiens |
| 57157  | putative homeodomain transcription factor 2                                        | PHTF2   | Homo sapiens |
| 5264   | phytanoyl-CoA 2-hydroxylase                                                        | PHYH    | Homo sapiens |
| 5266   | peptidase inhibitor 3, skin-derived                                                | PI3     | Homo sapiens |
| 8554   | protein inhibitor of activated STAT, 1                                             | PIAS1   | Homo sapiens |
| 9063   | protein inhibitor of activated STAT, 2                                             | PIAS2   | Homo sapiens |
| 10401  | protein inhibitor of activated STAT, 3                                             | PIAS3   | Homo sapiens |
| 8301   | phosphatidylinositol binding clathrin assembly protein                             | PICALM  | Homo sapiens |
| 5277   | phosphatidylinositol glycan anchor biosynthesis, class A                           | PIGA    | Homo sapiens |
| 9488   | phosphatidylinositol glycan anchor biosynthesis, class B                           | PIGB    | Homo sapiens |
| 5279   | phosphatidylinositol glycan anchor biosynthesis, class C                           | PIGC    | Homo sapiens |
| 5281   | phosphatidylinositol glycan anchor biosynthesis, class F                           | PIGF    | Homo sapiens |
| 9487   | phosphatidylinositol glycan anchor biosynthesis, class L                           | PIGL    | Homo sapiens |
| 9091   | phosphatidylinositol glycan anchor biosynthesis, class Q                           | PIGQ    | Homo sapiens |
| 5284   | polymeric immunoglobulin receptor                                                  | PIGR    | Homo sapiens |
| 5287   | phosphoinositide-3-kinase, class 2, beta polypeptide                               | PIK3C2B | Homo sapiens |
| 5288   | phosphoinositide-3-kinase, class 2, gamma polypeptide                              | PIK3C2G | Homo sapiens |
| 5289   | phosphoinositide-3-kinase, class 3                                                 | PIK3C3  | Homo sapiens |
| 5290   | phosphoinositide-3-kinase, catalytic, alpha polypeptide                            | PIK3CA  | Homo sapiens |
| 5291   | phosphoinositide-3-kinase, catalytic, beta polypeptide                             | PIK3CB  | Homo sapiens |



|           |                                                                                                                                                                  |         |              |
|-----------|------------------------------------------------------------------------------------------------------------------------------------------------------------------|---------|--------------|
| 5294      | phosphoinositide-3-kinase, catalytic, gamma polypeptide                                                                                                          | PIK3CG  | Homo sapiens |
| 5295      | phosphoinositide-3-kinase, regulatory subunit 1 (alpha)                                                                                                          | PIK3R1  | Homo sapiens |
| 5296      | phosphoinositide-3-kinase, regulatory subunit 2 (beta)                                                                                                           | PIK3R2  | Homo sapiens |
| 8503      | phosphoinositide-3-kinase, regulatory subunit 3 (gamma)                                                                                                          | PIK3R3  | Homo sapiens |
| 30849     | phosphoinositide-3-kinase, regulatory subunit 4                                                                                                                  | PIK3R4  | Homo sapiens |
| 5304      | prolactin-induced protein                                                                                                                                        | PIP     | Homo sapiens |
| 8394      | phosphatidylinositol-4-phosphate 5-kinase, type I, alpha                                                                                                         | PIP5K1A | Homo sapiens |
| 8395      | phosphatidylinositol-4-phosphate 5-kinase, type I, beta                                                                                                          | PIP5K1B | Homo sapiens |
| 23396     | phosphatidylinositol-4-phosphate 5-kinase, type I, gamma                                                                                                         | PIP5K1C | Homo sapiens |
| 8544      | pirin (iron-binding nuclear protein)                                                                                                                             | PIR     | Homo sapiens |
| 23761     | phosphatidylserine decarboxylase                                                                                                                                 | PISD    | Homo sapiens |
| 5306      | phosphatidylinositol transfer protein, alpha                                                                                                                     | PITPNA  | Homo sapiens |
| 23760     | phosphatidylinositol transfer protein, beta                                                                                                                      | PITPNB  | Homo sapiens |
| 9600      | phosphatidylinositol transfer protein, membrane-associated 1                                                                                                     | PITPNM1 | Homo sapiens |
| 5308      | paired-like homeodomain 2                                                                                                                                        | PITX2   | Homo sapiens |
| 9271      | piwi-like 1 (Drosophila)                                                                                                                                         | PIWIL1  | Homo sapiens |
| 55124     | hydroxy-delta-5-steroid dehydrogenase, 3 beta- and steroid delta-isomerase 7; piwi-like 2 (Drosophila)                                                           | PIWIL2  | Homo sapiens |
| 80270     | hydroxy-delta-5-steroid dehydrogenase, 3 beta- and steroid delta-isomerase 7; piwi-like 2 (Drosophila)                                                           | PIWIL2  | Homo sapiens |
| 5311      | polycystic kidney disease 2 (autosomal dominant)                                                                                                                 | PKD2    | Homo sapiens |
| 5569      | protein kinase (cAMP-dependent, catalytic) inhibitor alpha                                                                                                       | PKIA    | Homo sapiens |
| 11142     | protein kinase (cAMP-dependent, catalytic) inhibitor gamma                                                                                                       | PKIG    | Homo sapiens |
| 5313      | pyruvate kinase, liver and RBC                                                                                                                                   | PKLR    | Homo sapiens |
| 652797    | similar to Pyruvate kinase, isozymes M1/M2 (Pyruvate kinase muscle isozyme) (Cytosolic thyroid hormone-binding protein) (CTHBP) (THBP1); pyruvate kinase, muscle | PKM2    | Homo sapiens |
| 5315      | similar to Pyruvate kinase, isozymes M1/M2 (Pyruvate kinase muscle isozyme) (Cytosolic thyroid hormone-binding protein) (CTHBP) (THBP1); pyruvate kinase, muscle | PKM2    | Homo sapiens |
| 5585      | protein kinase N1                                                                                                                                                | PKN1    | Homo sapiens |
| 5586      | protein kinase N2                                                                                                                                                | PKN2    | Homo sapiens |
| 5316      | PBX/knotted 1 homeobox 1                                                                                                                                         | PKNOX1  | Homo sapiens |
| 11187     | plakophilin 3                                                                                                                                                    | PKP3    | Homo sapiens |
| 8502      | plakophilin 4                                                                                                                                                    | PKP4    | Homo sapiens |
| 51365     | phospholipase A1 member A                                                                                                                                        | PLA1A   | Homo sapiens |
| 5320      | phospholipase A2, group IIA (platelets, synovial fluid)                                                                                                          | PLA2G2A | Homo sapiens |
| 30814     | phospholipase A2, group IIE                                                                                                                                      | PLA2G2E | Homo sapiens |
| 5321      | phospholipase A2, group IVA (cytosolic, calcium-dependent)                                                                                                       | PLA2G4A | Homo sapiens |
| 8681      | JMJD7-PLA2G4B readthrough transcript; phospholipase A2, group IVB (cytosolic); jumonji domain containing 7                                                       | PLA2G4B | Homo sapiens |
| 100137047 | JMJD7-PLA2G4B readthrough transcript; phospholipase A2, group IVB (cytosolic); jumonji domain containing 7                                                       | PLA2G4B | Homo sapiens |
| 100137049 | JMJD7-PLA2G4B readthrough transcript; phospholipase A2, group IVB (cytosolic); jumonji domain containing 7                                                       | PLA2G4B | Homo sapiens |
| 8605      | phospholipase A2, group IVC (cytosolic, calcium-independent)                                                                                                     | PLA2G4C | Homo sapiens |
| 5322      | phospholipase A2, group V                                                                                                                                        | PLA2G5  | Homo sapiens |
| 8398      | phospholipase A2, group VI (cytosolic, calcium-independent)                                                                                                      | PLA2G6  | Homo sapiens |

|        |                                                                                              |         |              |
|--------|----------------------------------------------------------------------------------------------|---------|--------------|
| 7941   | phospholipase A2, group VII (platelet-activating factor acetylhydrolase, plasma)             | PLA2G7  | Homo sapiens |
| 22925  | phospholipase A2 receptor 1, 180kDa                                                          | PLA2R1  | Homo sapiens |
| 5324   | pleiomorphic adenoma gene 1                                                                  | PLAG1   | Homo sapiens |
| 152845 | pleiomorphic adenoma gene-like 2; similar to pleiomorphic adenoma gene-like 2                | PLAGL2  | Homo sapiens |
| 5326   | pleiomorphic adenoma gene-like 2; similar to pleiomorphic adenoma gene-like 2                | PLAGL2  | Homo sapiens |
| 5327   | plasminogen activator, tissue                                                                | PLAT    | Homo sapiens |
| 5328   | plasminogen activator, urokinase                                                             | PLAU    | Homo sapiens |
| 5329   | plasminogen activator, urokinase receptor                                                    | PLAUR   | Homo sapiens |
| 23236  | phospholipase C, beta 1 (phosphoinositide-specific)                                          | PLCB1   | Homo sapiens |
| 5330   | phospholipase C, beta 2                                                                      | PLCB2   | Homo sapiens |
| 5332   | phospholipase C, beta 4                                                                      | PLCB4   | Homo sapiens |
| 5333   | phospholipase C, delta 1                                                                     | PLCD1   | Homo sapiens |
| 5335   | phospholipase C, gamma 1                                                                     | PLCG1   | Homo sapiens |
| 5336   | phospholipase C, gamma 2 (phosphatidylinositol-specific)                                     | PLCG2   | Homo sapiens |
| 23228  | phospholipase C-like 2                                                                       | PLCL2   | Homo sapiens |
| 5337   | phospholipase D1, phosphatidylcholine-specific                                               | PLD1    | Homo sapiens |
| 5338   | phospholipase D2                                                                             | PLD2    | Homo sapiens |
| 23646  | phospholipase D family, member 3                                                             | PLD3    | Homo sapiens |
| 5341   | pleckstrin                                                                                   | PLEK    | Homo sapiens |
| 59338  | pleckstrin homology domain containing, family A (phosphoinositide binding specific) member 1 | PLEKHA1 | Homo sapiens |
| 58473  | pleckstrin homology domain containing, family B (evectins) member 1                          | PLEKHB1 | Homo sapiens |
| 5340   | plasminogen                                                                                  | PLG     | Homo sapiens |
| 5347   | polo-like kinase 1 (Drosophila)                                                              | PLK1    | Homo sapiens |
| 10769  | polo-like kinase 2 (Drosophila)                                                              | PLK2    | Homo sapiens |
| 1263   | polo-like kinase 3 (Drosophila)                                                              | PLK3    | Homo sapiens |
| 5352   | procollagen-lysine, 2-oxoglutarate 5-dioxygenase 2                                           | PLOD2   | Homo sapiens |
| 8985   | procollagen-lysine, 2-oxoglutarate 5-dioxygenase 3                                           | PLOD3   | Homo sapiens |
| 5354   | proteolipid protein 1                                                                        | PLP1    | Homo sapiens |
| 5355   | proteolipid protein 2 (colonic epithelium-enriched)                                          | PLP2    | Homo sapiens |
| 5358   | plastin 3 (T isoform)                                                                        | PLS3    | Homo sapiens |
| 5359   | phospholipid scramblase 1                                                                    | PLSCR1  | Homo sapiens |
| 5360   | phospholipid transfer protein                                                                | PLTP    | Homo sapiens |
| 55558  | plexin A3                                                                                    | PLXNA3  | Homo sapiens |
| 5364   | plexin B1                                                                                    | PLXNB1  | Homo sapiens |
| 5365   | plexin B3                                                                                    | PLXNB3  | Homo sapiens |
| 10154  | plexin C1                                                                                    | PLXNC1  | Homo sapiens |
| 652346 | promyelocytic leukemia; similar to promyelocytic leukemia protein isoform 1                  | PML     | Homo sapiens |
| 5371   | promyelocytic leukemia; similar to promyelocytic leukemia protein isoform 1                  | PML     | Homo sapiens |
| 5372   | phosphomannomutase 1                                                                         | PMM1    | Homo sapiens |
| 5376   | peripheral myelin protein 22                                                                 | PMP22   | Homo sapiens |
| 9512   | peptidase (mitochondrial processing) beta                                                    | PMPCB   | Homo sapiens |

|           |                                                                                |          |              |
|-----------|--------------------------------------------------------------------------------|----------|--------------|
| 5378      | PMS1 postmeiotic segregation increased 1 ( <i>S. cerevisiae</i> )              | PMS1     | Homo sapiens |
| 10654     | phosphomevalonate kinase                                                       | PMVK     | Homo sapiens |
| 5407      | pancreatic lipase-related protein 1                                            | PNLIPRP1 | Homo sapiens |
| 5408      | pancreatic lipase-related protein 2                                            | PNLIPRP2 | Homo sapiens |
| 5409      | phenylethanolamine N-methyltransferase                                         | PNMT     | Homo sapiens |
| 5411      | pinin, desmosome associated protein                                            | PNN      | Homo sapiens |
| 5368      | prepronociceptin                                                               | PNOC     | Homo sapiens |
| 87178     | polyribonucleotide nucleotidyltransferase 1                                    | PNPT1    | Homo sapiens |
| 10957     | proline-rich nuclear receptor coactivator 1                                    | PNRC1    | Homo sapiens |
| 55629     | proline-rich nuclear receptor coactivator 2; similar to hCG1728885             | PNRC2    | Homo sapiens |
| 100131261 | proline-rich nuclear receptor coactivator 2; similar to hCG1728885             | PNRC2    | Homo sapiens |
| 5420      | podocalyxin-like                                                               | PODXL    | Homo sapiens |
| 5423      | polymerase (DNA directed), beta                                                | POLB     | Homo sapiens |
| 5424      | polymerase (DNA directed), delta 1, catalytic subunit 125kDa                   | POLD1    | Homo sapiens |
| 5425      | polymerase (DNA directed), delta 2, regulatory subunit 50kDa                   | POLD2    | Homo sapiens |
| 10714     | polymerase (DNA-directed), delta 3, accessory subunit                          | POLD3    | Homo sapiens |
| 57804     | polymerase (DNA-directed), delta 4                                             | POLD4    | Homo sapiens |
| 84271     | polymerase (DNA-directed), delta interacting protein 3                         | POLDIP3  | Homo sapiens |
| 5427      | polymerase (DNA directed), epsilon 2 (p59 subunit)                             | POLE2    | Homo sapiens |
| 11232     | polymerase (DNA directed), gamma 2, accessory subunit                          | POLG2    | Homo sapiens |
| 5430      | polymerase (RNA) II (DNA directed) polypeptide A, 220kDa                       | POLR2A   | Homo sapiens |
| 5431      | polymerase (RNA) II (DNA directed) polypeptide B, 140kDa                       | POLR2B   | Homo sapiens |
| 5435      | polymerase (RNA) II (DNA directed) polypeptide F                               | POLR2F   | Homo sapiens |
| 5436      | polymerase (RNA) II (DNA directed) polypeptide G                               | POLR2G   | Homo sapiens |
| 5437      | polymerase (RNA) II (DNA directed) polypeptide H                               | POLR2H   | Homo sapiens |
| 5439      | polymerase (RNA) II (DNA directed) polypeptide J, 13.3kDa                      | POLR2J   | Homo sapiens |
| 5440      | polymerase (RNA) II (DNA directed) polypeptide K, 7.0kDa                       | POLR2K   | Homo sapiens |
| 10623     | polymerase (RNA) III (DNA directed) polypeptide C (62kD)                       | POLR3C   | Homo sapiens |
| 661       | polymerase (RNA) III (DNA directed) polypeptide D, 44kDa                       | POLR3D   | Homo sapiens |
| 5442      | polymerase (RNA) mitochondrial (DNA directed)                                  | POLRMT   | Homo sapiens |
| 5445      | paraoxonase 2                                                                  | PON2     | Homo sapiens |
| 10775     | processing of precursor 4, ribonuclease P/MRP subunit ( <i>S. cerevisiae</i> ) | POP4     | Homo sapiens |
| 10248     | processing of precursor 7, ribonuclease P/MRP subunit ( <i>S. cerevisiae</i> ) | POP7     | Homo sapiens |
| 10631     | periostin, osteoblast specific factor                                          | POSTN    | Homo sapiens |
| 5450      | POU class 2 associating factor 1                                               | POU2AF1  | Homo sapiens |
| 5451      | POU class 2 homeobox 1                                                         | POU2F1   | Homo sapiens |
| 5454      | POU class 3 homeobox 2                                                         | POU3F2   | Homo sapiens |
| 5456      | POU class 3 homeobox 4                                                         | POU3F4   | Homo sapiens |
| 5457      | POU class 4 homeobox 1                                                         | POU4F1   | Homo sapiens |
| 8613      | phosphatidic acid phosphatase type 2B                                          | PPAP2B   | Homo sapiens |
| 8612      | phosphatidic acid phosphatase type 2C                                          | PPAP2C   | Homo sapiens |
| 5468      | peroxisome proliferator-activated receptor gamma                               | PPARG    | Homo sapiens |
| 5471      | phosphoribosyl pyrophosphate amidotransferase                                  | PPAT     | Homo sapiens |
| 5473      | pro-platelet basic protein (chemokine (C-X-C motif) ligand 7)                  | PPBP     | Homo sapiens |
| 5475      | protein phosphatase, EF-hand calcium binding domain 1                          | PPEF1    | Homo sapiens |
| 8500      | protein tyrosine phosphatase, receptor type, f polypeptide (PTPRF),            | PPFIA1   | Homo sapiens |

|       |                                                                                                           |          |              |
|-------|-----------------------------------------------------------------------------------------------------------|----------|--------------|
|       | interacting protein (liprin), alpha 1                                                                     |          |              |
| 8541  | protein tyrosine phosphatase, receptor type, f polypeptide (PTPRF), interacting protein (liprin), alpha 3 | PPFIA3   | Homo sapiens |
| 8496  | PTPRF interacting protein, binding protein 1 (liprin beta 1)                                              | PPFIBP1  | Homo sapiens |
| 8495  | PTPRF interacting protein, binding protein 2 (liprin beta 2)                                              | PPFIBP2  | Homo sapiens |
| 5479  | peptidylprolyl isomerase B (cyclophilin B)                                                                | PPIB     | Homo sapiens |
| 5480  | peptidylprolyl isomerase C (cyclophilin C)                                                                | PPIC     | Homo sapiens |
| 5481  | peptidylprolyl isomerase D                                                                                | PPID     | Homo sapiens |
| 10450 | peptidylprolyl isomerase E (cyclophilin E)                                                                | PPIE     | Homo sapiens |
| 10105 | peptidylprolyl isomerase F                                                                                | PPIF     | Homo sapiens |
| 9360  | peptidylprolyl isomerase G (cyclophilin G)                                                                | PPIG     | Homo sapiens |
| 10465 | peptidylprolyl isomerase H (cyclophilin H)                                                                | PPIH     | Homo sapiens |
| 23759 | peptidylprolyl isomerase (cyclophilin)-like 2                                                             | PPIL2    | Homo sapiens |
| 5493  | periplakin                                                                                                | PPL      | Homo sapiens |
| 5494  | protein phosphatase 1A (formerly 2C), magnesium-dependent, alpha isoform                                  | PPM1A    | Homo sapiens |
| 5495  | protein phosphatase 1B (formerly 2C), magnesium-dependent, beta isoform                                   | PPM1B    | Homo sapiens |
| 8493  | protein phosphatase 1D magnesium-dependent, delta isoform                                                 | PPM1D    | Homo sapiens |
| 9647  | protein phosphatase 1F (PP2C domain containing)                                                           | PPM1F    | Homo sapiens |
| 5498  | protoporphyrinogen oxidase                                                                                | PPOX     | Homo sapiens |
| 5499  | protein phosphatase 1, catalytic subunit, alpha isoform                                                   | PPP1CA   | Homo sapiens |
| 5501  | protein phosphatase 1, catalytic subunit, gamma isoform                                                   | PPP1CC   | Homo sapiens |
| 5514  | protein phosphatase 1, regulatory (inhibitor) subunit 10                                                  | PPP1R10  | Homo sapiens |
| 6992  | protein phosphatase 1, regulatory (inhibitor) subunit 11                                                  | PPP1R11  | Homo sapiens |
| 4659  | protein phosphatase 1, regulatory (inhibitor) subunit 12A                                                 | PPP1R12A | Homo sapiens |
| 4660  | protein phosphatase 1, regulatory (inhibitor) subunit 12B                                                 | PPP1R12B | Homo sapiens |
| 23368 | protein phosphatase 1, regulatory (inhibitor) subunit 13B                                                 | PPP1R13B | Homo sapiens |
| 23645 | protein phosphatase 1, regulatory (inhibitor) subunit 15A                                                 | PPP1R15A | Homo sapiens |
| 26051 | protein phosphatase 1, regulatory (inhibitor) subunit 16B                                                 | PPP1R16B | Homo sapiens |
| 5504  | protein phosphatase 1, regulatory (inhibitor) subunit 2                                                   | PPP1R2   | Homo sapiens |
| 5506  | protein phosphatase 1, regulatory (inhibitor) subunit 3A                                                  | PPP1R3A  | Homo sapiens |
| 5510  | protein phosphatase 1, regulatory (inhibitor) subunit 7                                                   | PPP1R7   | Homo sapiens |
| 5515  | protein phosphatase 2 (formerly 2A), catalytic subunit, alpha isoform                                     | PPP2CA   | Homo sapiens |
| 5516  | protein phosphatase 2 (formerly 2A), catalytic subunit, beta isoform                                      | PPP2CB   | Homo sapiens |
| 5518  | protein phosphatase 2 (formerly 2A), regulatory subunit A, alpha isoform                                  | PPP2R1A  | Homo sapiens |
| 5520  | protein phosphatase 2 (formerly 2A), regulatory subunit B, alpha isoform                                  | PPP2R2A  | Homo sapiens |
| 5524  | protein phosphatase 2A activator, regulatory subunit 4                                                    | PPP2R4   | Homo sapiens |
| 5525  | protein phosphatase 2, regulatory subunit B', alpha isoform                                               | PPP2R5A  | Homo sapiens |
| 5526  | protein phosphatase 2, regulatory subunit B', beta isoform                                                | PPP2R5B  | Homo sapiens |
| 5527  | protein phosphatase 2, regulatory subunit B', gamma isoform                                               | PPP2R5C  | Homo sapiens |
| 5529  | protein phosphatase 2, regulatory subunit B', epsilon isoform                                             | PPP2R5E  | Homo sapiens |
| 5530  | protein phosphatase 3 (formerly 2B), catalytic subunit, alpha isoform                                     | PPP3CA   | Homo sapiens |
| 5532  | protein phosphatase 3 (formerly 2B), catalytic subunit, beta isoform                                      | PPP3CB   | Homo sapiens |
| 5533  | protein phosphatase 3 (formerly 2B), catalytic subunit, gamma                                             | PPP3CC   | Homo sapiens |

|        | isoform                                                                                                                  |         |              |
|--------|--------------------------------------------------------------------------------------------------------------------------|---------|--------------|
| 5534   | protein phosphatase 3 (formerly 2B), regulatory subunit B, alpha isoform                                                 | PPP3R1  | Homo sapiens |
| 9989   | protein phosphatase 4, regulatory subunit 1                                                                              | PPP4R1  | Homo sapiens |
| 5537   | protein phosphatase 6, catalytic subunit                                                                                 | PPP6C   | Homo sapiens |
| 5538   | palmitoyl-protein thioesterase 1                                                                                         | PPT1    | Homo sapiens |
| 10084  | polyglutamine binding protein 1                                                                                          | PQBP1   | Homo sapiens |
| 11230  | PRA1 domain family, member 2                                                                                             | PRAF2   | Homo sapiens |
| 23532  | preferentially expressed antigen in melanoma                                                                             | PRAME   | Homo sapiens |
| 5546   | papillary renal cell carcinoma (translocation-associated)                                                                | PRCC    | Homo sapiens |
| 5547   | prolylcarboxypeptidase (angiotensinase C)                                                                                | PRCP    | Homo sapiens |
| 639    | PR domain containing 1, with ZNF domain                                                                                  | PRDM1   | Homo sapiens |
| 63976  | PR domain containing 16                                                                                                  | PRDM16  | Homo sapiens |
| 7799   | PR domain containing 2, with ZNF domain                                                                                  | PRDM2   | Homo sapiens |
| 5052   | peroxiredoxin 1                                                                                                          | PRDX1   | Homo sapiens |
| 10935  | peroxiredoxin 3                                                                                                          | PRDX3   | Homo sapiens |
| 10549  | peroxiredoxin 4                                                                                                          | PRDX4   | Homo sapiens |
| 25824  | peroxiredoxin 5                                                                                                          | PRDX5   | Homo sapiens |
| 9588   | peroxiredoxin 6                                                                                                          | PRDX6   | Homo sapiens |
| 5549   | proline/arginine-rich end leucine-rich repeat protein                                                                    | PRELP   | Homo sapiens |
| 5550   | prolyl endopeptidase                                                                                                     | PREP    | Homo sapiens |
| 5551   | perforin 1 (pore forming protein)                                                                                        | PRF1    | Homo sapiens |
| 5553   | proteoglycan 2, bone marrow (natural killer cell activator, eosinophil granule major basic protein)                      | PRG2    | Homo sapiens |
| 5557   | primase, DNA, polypeptide 1 (49kDa)                                                                                      | PRIM1   | Homo sapiens |
| 5562   | protein kinase, AMP-activated, alpha 1 catalytic subunit                                                                 | PRKAA1  | Homo sapiens |
| 5563   | protein kinase, AMP-activated, alpha 2 catalytic subunit                                                                 | PRKAA2  | Homo sapiens |
| 5565   | protein kinase, AMP-activated, beta 2 non-catalytic subunit                                                              | PRKAB2  | Homo sapiens |
| 5566   | protein kinase, cAMP-dependent, catalytic, alpha                                                                         | PRKACA  | Homo sapiens |
| 5567   | protein kinase, cAMP-dependent, catalytic, beta                                                                          | PRKACB  | Homo sapiens |
| 5571   | protein kinase, AMP-activated, gamma 1 non-catalytic subunit                                                             | PRKAG1  | Homo sapiens |
| 5576   | protein kinase, cAMP-dependent, regulatory, type II, alpha                                                               | PRKAR2A | Homo sapiens |
| 5577   | protein kinase, cAMP-dependent, regulatory, type II, beta                                                                | PRKAR2B | Homo sapiens |
| 5578   | protein kinase C, alpha                                                                                                  | PRKCA   | Homo sapiens |
| 5580   | protein kinase C, delta                                                                                                  | PRKCD   | Homo sapiens |
| 5581   | protein kinase C, epsilon                                                                                                | PRKCE   | Homo sapiens |
| 5582   | protein kinase C, gamma                                                                                                  | PRKCG   | Homo sapiens |
| 5583   | protein kinase C, eta                                                                                                    | PRKCH   | Homo sapiens |
| 5584   | protein kinase C, iota                                                                                                   | PRKCI   | Homo sapiens |
| 5590   | protein kinase C, zeta                                                                                                   | PRKCZ   | Homo sapiens |
| 731751 | similar to protein kinase, DNA-activated, catalytic polypeptide;<br>protein kinase, DNA-activated, catalytic polypeptide | PRKDC   | Homo sapiens |
| 5591   | similar to protein kinase, DNA-activated, catalytic polypeptide;<br>protein kinase, DNA-activated, catalytic polypeptide | PRKDC   | Homo sapiens |
| 5593   | protein kinase, cGMP-dependent, type II                                                                                  | PRKG2   | Homo sapiens |
| 5612   | protein-kinase, interferon-inducible double stranded RNA dependent inhibitor, repressor of (P58 repressor)               | PRKRIR  | Homo sapiens |

|        |                                                                            |         |              |
|--------|----------------------------------------------------------------------------|---------|--------------|
| 5617   | prolactin                                                                  | PRL     | Homo sapiens |
| 5618   | prolactin receptor                                                         | PRLR    | Homo sapiens |
| 5619   | protamine 1                                                                | PRM1    | Homo sapiens |
| 5621   | prion protein                                                              | PRNP    | Homo sapiens |
| 5624   | protein C (inactivator of coagulation factors Va and VIIIa)                | PROC    | Homo sapiens |
| 10544  | protein C receptor, endothelial (EPCR)                                     | PROCR   | Homo sapiens |
| 5625   | proline dehydrogenase (oxidase) 1                                          | PRODH   | Homo sapiens |
| 8842   | prominin 1                                                                 | PROM1   | Homo sapiens |
| 5626   | PROP paired-like homeobox 1                                                | PROP1   | Homo sapiens |
| 5627   | protein S (alpha)                                                          | PROS1   | Homo sapiens |
| 11212  | proline synthetase co-transcribed homolog (bacterial)                      | PROSC   | Homo sapiens |
| 8858   | protein Z, vitamin K-dependent plasma glycoprotein                         | PROZ    | Homo sapiens |
| 8559   | PRP18 pre-mRNA processing factor 18 homolog (S. cerevisiae)                | PRPF18  | Homo sapiens |
| 9129   | PRP3 pre-mRNA processing factor 3 homolog (S. cerevisiae)                  | PRPF3   | Homo sapiens |
| 26121  | PRP31 pre-mRNA processing factor 31 homolog (S. cerevisiae)                | PRPF31  | Homo sapiens |
| 9128   | PRP4 pre-mRNA processing factor 4 homolog (yeast)                          | PRPF4   | Homo sapiens |
| 8899   | similar to hCG1820375; PRP4 pre-mRNA processing factor 4 homolog B (yeast) | PRPF4B  | Homo sapiens |
| 653155 | similar to hCG1820375; PRP4 pre-mRNA processing factor 4 homolog B (yeast) | PRPF4B  | Homo sapiens |
| 5630   | peripherin                                                                 | PRPH    | Homo sapiens |
| 5634   | phosphoribosyl pyrophosphate synthetase 2                                  | PRPS2   | Homo sapiens |
| 5635   | phosphoribosyl pyrophosphate synthetase-associated protein 1               | PRPSAP1 | Homo sapiens |
| 5636   | phosphoribosyl pyrophosphate synthetase-associated protein 2               | PRPSAP2 | Homo sapiens |
| 5638   | proline rich Gla (G-carboxyglutamic acid) 1                                | PRRG1   | Homo sapiens |
| 5639   | proline rich Gla (G-carboxyglutamic acid) 2                                | PRRG2   | Homo sapiens |
| 5396   | paired related homeobox 1                                                  | PRRX1   | Homo sapiens |
| 8492   | protease, serine, 12 (neurotrypsin, motopsin)                              | PRSS12  | Homo sapiens |
| 10279  | protease, serine, 16 (thymus)                                              | PRSS16  | Homo sapiens |
| 11098  | protease, serine, 23                                                       | PRSS23  | Homo sapiens |
| 5660   | prosaposin                                                                 | PSAP    | Homo sapiens |
| 5662   | pleckstrin and Sec7 domain containing                                      | PSD     | Homo sapiens |
| 23550  | pleckstrin and Sec7 domain containing 4                                    | PSD4    | Homo sapiens |
| 5663   | presenilin 1                                                               | PSEN1   | Homo sapiens |
| 5664   | presenilin 2 (Alzheimer disease 4)                                         | PSEN2   | Homo sapiens |
| 11168  | PC4 and SFRS1 interacting protein 1                                        | PSIP1   | Homo sapiens |
| 5681   | protein serine kinase H1                                                   | PSKH1   | Homo sapiens |
| 5682   | proteasome (prosome, macropain) subunit, alpha type, 1                     | PSMA1   | Homo sapiens |
| 5683   | proteasome (prosome, macropain) subunit, alpha type, 2                     | PSMA2   | Homo sapiens |
| 5684   | proteasome (prosome, macropain) subunit, alpha type, 3                     | PSMA3   | Homo sapiens |
| 5685   | proteasome (prosome, macropain) subunit, alpha type, 4                     | PSMA4   | Homo sapiens |
| 5686   | proteasome (prosome, macropain) subunit, alpha type, 5                     | PSMA5   | Homo sapiens |
| 5687   | proteasome (prosome, macropain) subunit, alpha type, 6                     | PSMA6   | Homo sapiens |
| 5688   | proteasome (prosome, macropain) subunit, alpha type, 7                     | PSMA7   | Homo sapiens |
| 5689   | proteasome (prosome, macropain) subunit, beta type, 1                      | PSMB1   | Homo sapiens |
| 5691   | proteasome (prosome, macropain) subunit, beta type, 3                      | PSMB3   | Homo sapiens |

|        |                                                                                                                                                                           |         |              |
|--------|---------------------------------------------------------------------------------------------------------------------------------------------------------------------------|---------|--------------|
| 5693   | proteasome (prosome, macropain) subunit, beta type, 5                                                                                                                     | PSMB5   | Homo sapiens |
| 5695   | proteasome (prosome, macropain) subunit, beta type, 7                                                                                                                     | PSMB7   | Homo sapiens |
| 5696   | proteasome (prosome, macropain) subunit, beta type, 8 (large multifunctional peptidase 7)                                                                                 | PSMB8   | Homo sapiens |
| 5701   | proteasome (prosome, macropain) 26S subunit, ATPase, 2                                                                                                                    | PSMC2   | Homo sapiens |
| 5702   | proteasome (prosome, macropain) 26S subunit, ATPase, 3                                                                                                                    | PSMC3   | Homo sapiens |
| 652826 | similar to 26S protease regulatory subunit 6B (MIP224) (MB67-interacting protein) (TAT-binding protein 7) (TBP-7); proteasome (prosome, macropain) 26S subunit, ATPase, 4 | PSMC4   | Homo sapiens |
| 5704   | similar to 26S protease regulatory subunit 6B (MIP224) (MB67-interacting protein) (TAT-binding protein 7) (TBP-7); proteasome (prosome, macropain) 26S subunit, ATPase, 4 | PSMC4   | Homo sapiens |
| 5705   | proteasome (prosome, macropain) 26S subunit, ATPase, 5                                                                                                                    | PSMC5   | Homo sapiens |
| 5706   | proteasome (prosome, macropain) 26S subunit, ATPase, 6                                                                                                                    | PSMC6   | Homo sapiens |
| 5707   | proteasome (prosome, macropain) 26S subunit, non-ATPase, 1                                                                                                                | PSMD1   | Homo sapiens |
| 5716   | proteasome (prosome, macropain) 26S subunit, non-ATPase, 10                                                                                                               | PSMD10  | Homo sapiens |
| 5717   | proteasome (prosome, macropain) 26S subunit, non-ATPase, 11                                                                                                               | PSMD11  | Homo sapiens |
| 5718   | proteasome (prosome, macropain) 26S subunit, non-ATPase, 12                                                                                                               | PSMD12  | Homo sapiens |
| 5719   | proteasome (prosome, macropain) 26S subunit, non-ATPase, 13                                                                                                               | PSMD13  | Homo sapiens |
| 10213  | proteasome (prosome, macropain) 26S subunit, non-ATPase, 14                                                                                                               | PSMD14  | Homo sapiens |
| 5709   | proteasome (prosome, macropain) 26S subunit, non-ATPase, 3                                                                                                                | PSMD3   | Homo sapiens |
| 5710   | proteasome (prosome, macropain) 26S subunit, non-ATPase, 4                                                                                                                | PSMD4   | Homo sapiens |
| 5711   | proteasome (prosome, macropain) 26S subunit, non-ATPase, 5                                                                                                                | PSMD5   | Homo sapiens |
| 5714   | proteasome (prosome, macropain) 26S subunit, non-ATPase, 8                                                                                                                | PSMD8   | Homo sapiens |
| 5721   | proteasome (prosome, macropain) activator subunit 2 (PA28 beta)                                                                                                           | PSME2   | Homo sapiens |
| 10197  | proteasome (prosome, macropain) activator subunit 3 (PA28 gamma; Ki)                                                                                                      | PSME3   | Homo sapiens |
| 23198  | proteasome (prosome, macropain) activator subunit 4                                                                                                                       | PSME4   | Homo sapiens |
| 9491   | proteasome (prosome, macropain) inhibitor subunit 1 (PI31)                                                                                                                | PSMF1   | Homo sapiens |
| 9051   | proline-serine-threonine phosphatase interacting protein 1                                                                                                                | PSTPIP1 | Homo sapiens |
| 5725   | polypyrimidine tract binding protein 1                                                                                                                                    | PTBP1   | Homo sapiens |
| 9791   | phosphatidylserine synthase 1                                                                                                                                             | PTDSS1  | Homo sapiens |
| 5730   | prostaglandin D2 synthase, hematopoietic; prostaglandin D2 synthase 21kDa (brain)                                                                                         | PTGDS   | Homo sapiens |
| 27306  | prostaglandin D2 synthase, hematopoietic; prostaglandin D2 synthase 21kDa (brain)                                                                                         | PTGDS   | Homo sapiens |
| 5732   | prostaglandin E receptor 2 (subtype EP2), 53kDa                                                                                                                           | PTGER2  | Homo sapiens |
| 5734   | prostaglandin E receptor 4 (subtype EP4)                                                                                                                                  | PTGER4  | Homo sapiens |
| 5739   | prostaglandin I2 (prostacyclin) receptor (IP)                                                                                                                             | PTGIR   | Homo sapiens |
| 5740   | prostaglandin I2 (prostacyclin) synthase                                                                                                                                  | PTGIS   | Homo sapiens |
| 5742   | prostaglandin-endoperoxide synthase 1 (prostaglandin G/H synthase and cyclooxygenase)                                                                                     | PTGS1   | Homo sapiens |
| 5743   | prostaglandin-endoperoxide synthase 2 (prostaglandin G/H synthase and cyclooxygenase)                                                                                     | PTGS2   | Homo sapiens |
| 5744   | parathyroid hormone-like hormone                                                                                                                                          | PTH1H   | Homo sapiens |
| 5747   | PTK2 protein tyrosine kinase 2                                                                                                                                            | PTK2    | Homo sapiens |
| 2185   | PTK2B protein tyrosine kinase 2 beta                                                                                                                                      | PTK2B   | Homo sapiens |
| 5754   | PTK7 protein tyrosine kinase 7                                                                                                                                            | PTK7    | Homo sapiens |

|        |                                                                                                                   |         |              |
|--------|-------------------------------------------------------------------------------------------------------------------|---------|--------------|
| 7803   | protein tyrosine phosphatase type IVA, member 1                                                                   | PTP4A1  | Homo sapiens |
| 11156  | protein tyrosine phosphatase type IVA, member 3                                                                   | PTP4A3  | Homo sapiens |
| 9200   | protein tyrosine phosphatase-like (proline instead of catalytic arginine), member A                               | PTPLA   | Homo sapiens |
| 5770   | protein tyrosine phosphatase, non-receptor type 1                                                                 | PTPN1   | Homo sapiens |
| 442113 | protein tyrosine phosphatase, non-receptor type 11; similar to protein tyrosine phosphatase, non-receptor type 11 | PTPN11  | Homo sapiens |
| 5781   | protein tyrosine phosphatase, non-receptor type 11; similar to protein tyrosine phosphatase, non-receptor type 11 | PTPN11  | Homo sapiens |
| 344593 | protein tyrosine phosphatase, non-receptor type 11; similar to protein tyrosine phosphatase, non-receptor type 11 | PTPN11  | Homo sapiens |
| 5782   | protein tyrosine phosphatase, non-receptor type 12                                                                | PTPN12  | Homo sapiens |
| 5783   | protein tyrosine phosphatase, non-receptor type 13 (APO-1/CD95 (Fas)-associated phosphatase)                      | PTPN13  | Homo sapiens |
| 5771   | protein tyrosine phosphatase, non-receptor type 2                                                                 | PTPN2   | Homo sapiens |
| 11099  | protein tyrosine phosphatase, non-receptor type 21                                                                | PTPN21  | Homo sapiens |
| 26191  | protein tyrosine phosphatase, non-receptor type 22 (lymphoid)                                                     | PTPN22  | Homo sapiens |
| 5774   | protein tyrosine phosphatase, non-receptor type 3                                                                 | PTPN3   | Homo sapiens |
| 5775   | protein tyrosine phosphatase, non-receptor type 4 (megakaryocyte)                                                 | PTPN4   | Homo sapiens |
| 5777   | protein tyrosine phosphatase, non-receptor type 6                                                                 | PTPN6   | Homo sapiens |
| 5780   | protein tyrosine phosphatase, non-receptor type 9                                                                 | PTPN9   | Homo sapiens |
| 5787   | protein tyrosine phosphatase, receptor type, B                                                                    | PTPRB   | Homo sapiens |
| 5788   | protein tyrosine phosphatase, receptor type, C                                                                    | PTPRC   | Homo sapiens |
| 5790   | protein tyrosine phosphatase, receptor type, C-associated protein                                                 | PTPRCAP | Homo sapiens |
| 5789   | protein tyrosine phosphatase, receptor type, D                                                                    | PTPRD   | Homo sapiens |
| 5791   | protein tyrosine phosphatase, receptor type, E                                                                    | PTPRE   | Homo sapiens |
| 5792   | protein tyrosine phosphatase, receptor type, F                                                                    | PTPRF   | Homo sapiens |
| 5795   | protein tyrosine phosphatase, receptor type, J                                                                    | PTPRJ   | Homo sapiens |
| 5796   | protein tyrosine phosphatase, receptor type, K                                                                    | PTPRK   | Homo sapiens |
| 5798   | protein tyrosine phosphatase, receptor type, N                                                                    | PTPRN   | Homo sapiens |
| 5799   | protein tyrosine phosphatase, receptor type, N polypeptide 2                                                      | PTPRN2  | Homo sapiens |
| 5801   | protein tyrosine phosphatase, receptor type, R                                                                    | PTPRR   | Homo sapiens |
| 5802   | protein tyrosine phosphatase, receptor type, S                                                                    | PTPRS   | Homo sapiens |
| 11122  | protein tyrosine phosphatase, receptor type, T                                                                    | PTPRT   | Homo sapiens |
| 10076  | protein tyrosine phosphatase, receptor type, U                                                                    | PTPRU   | Homo sapiens |
| 284119 | polymerase I and transcript release factor                                                                        | PTRF    | Homo sapiens |
| 5805   | 6-pyruvoyltetrahydropterin synthase                                                                               | PTS     | Homo sapiens |
| 754    | pituitary tumor-transforming 1 interacting protein                                                                | PTTG1IP | Homo sapiens |
| 5813   | purine-rich element binding protein A                                                                             | PURA    | Homo sapiens |
| 80324  | pseudouridylate synthase 1                                                                                        | PUS1    | Homo sapiens |
| 5816   | parvalbumin                                                                                                       | PVALB   | Homo sapiens |
| 5817   | poliovirus receptor                                                                                               | PVR     | Homo sapiens |
| 29108  | PYD and CARD domain containing                                                                                    | PYCARD  | Homo sapiens |
| 5836   | phosphorylase, glycogen, liver                                                                                    | PYGL    | Homo sapiens |
| 5837   | phosphorylase, glycogen, muscle                                                                                   | PYGM    | Homo sapiens |
| 5858   | pregnancy-zone protein                                                                                            | PZP     | Homo sapiens |
| 5860   | quinoid dihydropteridine reductase                                                                                | QDPR    | Homo sapiens |



|           |                                                                                                             |           |              |
|-----------|-------------------------------------------------------------------------------------------------------------|-----------|--------------|
| 9444      | quaking homolog, KH domain RNA binding (mouse)                                                              | QKI       | Homo sapiens |
| 25797     | glutaminyl-peptide cyclotransferase                                                                         | QPCT      | Homo sapiens |
| 23475     | quinolinate phosphoribosyltransferase                                                                       | QPRT      | Homo sapiens |
| 8766      | RAB11A, member RAS oncogene family                                                                          | RAB11A    | Homo sapiens |
| 9230      | RAB11B, member RAS oncogene family                                                                          | RAB11B    | Homo sapiens |
| 9727      | RAB11 family interacting protein 3 (class II)                                                               | RAB11FIP3 | Homo sapiens |
| 51552     | RAB14, member RAS oncogene family                                                                           | RAB14     | Homo sapiens |
| 5861      | RAB1A, member RAS oncogene family                                                                           | RAB1A     | Homo sapiens |
| 57111     | RAB25, member RAS oncogene family                                                                           | RAB25     | Homo sapiens |
| 5873      | RAB27A, member RAS oncogene family                                                                          | RAB27A    | Homo sapiens |
| 5874      | RAB27B, member RAS oncogene family                                                                          | RAB27B    | Homo sapiens |
| 27314     | RAB30, member RAS oncogene family                                                                           | RAB30     | Homo sapiens |
| 11031     | RAB31, member RAS oncogene family                                                                           | RAB31     | Homo sapiens |
| 10981     | RAB32, member RAS oncogene family                                                                           | RAB32     | Homo sapiens |
| 9363      | RAB33A, member RAS oncogene family                                                                          | RAB33A    | Homo sapiens |
| 100130711 | similar to hCG1778032; RAB35, member RAS oncogene family                                                    | RAB35     | Homo sapiens |
| 11021     | similar to hCG1778032; RAB35, member RAS oncogene family                                                    | RAB35     | Homo sapiens |
| 9609      | RAB36, member RAS oncogene family                                                                           | RAB36     | Homo sapiens |
| 5864      | RAB3A, member RAS oncogene family                                                                           | RAB3A     | Homo sapiens |
| 10966     | RAB40B, member RAS oncogene family                                                                          | RAB40B    | Homo sapiens |
| 53916     | RAB4B, member RAS oncogene family                                                                           | RAB4B     | Homo sapiens |
| 5868      | RAB5A, member RAS oncogene family                                                                           | RAB5A     | Homo sapiens |
| 5878      | RAB5C, member RAS oncogene family                                                                           | RAB5C     | Homo sapiens |
| 5870      | RAB6C, member RAS oncogene family; RAB6A, member RAS oncogene family; hypothetical LOC100130819; RAB6C-like | RAB6A     | Homo sapiens |
| 100130819 | RAB6C, member RAS oncogene family; RAB6A, member RAS oncogene family; hypothetical LOC100130819; RAB6C-like | RAB6A     | Homo sapiens |
| 150786    | RAB6C, member RAS oncogene family; RAB6A, member RAS oncogene family; hypothetical LOC100130819; RAB6C-like | RAB6A     | Homo sapiens |
| 84084     | RAB6C, member RAS oncogene family; RAB6A, member RAS oncogene family; hypothetical LOC100130819; RAB6C-like | RAB6A     | Homo sapiens |
| 8934      | RAB7, member RAS oncogene family-like 1                                                                     | RAB7L1    | Homo sapiens |
| 4218      | RAB8A, member RAS oncogene family                                                                           | RAB8A     | Homo sapiens |
| 23637     | RAB GTPase activating protein 1                                                                             | RABGAP1   | Homo sapiens |
| 9910      | RAB GTPase activating protein 1-like                                                                        | RABGAP1L  | Homo sapiens |
| 5876      | Rab geranylgeranyltransferase, beta subunit                                                                 | RABGGTB   | Homo sapiens |
| 5877      | RAB interacting factor                                                                                      | RABIF     | Homo sapiens |
| 5879      | ras-related C3 botulinum toxin substrate 1 (rho family, small GTP binding protein Rac1)                     | RAC1      | Homo sapiens |
| 5880      | ras-related C3 botulinum toxin substrate 2 (rho family, small GTP binding protein Rac2)                     | RAC2      | Homo sapiens |
| 5810      | RAD1 homolog ( <i>S. pombe</i> )                                                                            | RAD1      | Homo sapiens |
| 5884      | RAD17 homolog ( <i>S. pombe</i> )                                                                           | RAD17     | Homo sapiens |
| 5885      | RAD21 homolog ( <i>S. pombe</i> )                                                                           | RAD21     | Homo sapiens |
| 5887      | RAD23 homolog B ( <i>S. cerevisiae</i> )                                                                    | RAD23B    | Homo sapiens |
| 10111     | RAD50 homolog ( <i>S. cerevisiae</i> )                                                                      | RAD50     | Homo sapiens |
| 5889      | RAD51 homolog C ( <i>S. cerevisiae</i> )                                                                    | RAD51C    | Homo sapiens |

|           |                                                                                          |          |              |
|-----------|------------------------------------------------------------------------------------------|----------|--------------|
| 5890      | RAD51-like 1 ( <i>S. cerevisiae</i> )                                                    | RAD51L1  | Homo sapiens |
| 5893      | RAD52 homolog ( <i>S. cerevisiae</i> )                                                   | RAD52    | Homo sapiens |
| 8438      | RAD54-like ( <i>S. cerevisiae</i> )                                                      | RAD54L   | Homo sapiens |
| 8480      | RAE1 RNA export 1 homolog ( <i>S. pombe</i> )                                            | RAE1     | Homo sapiens |
| 5894      | v-raf-1 murine leukemia viral oncogene homolog 1                                         | RAF1     | Homo sapiens |
| 5891      | renal tumor antigen                                                                      | RAGE     | Homo sapiens |
| 26064     | retinoic acid induced 14                                                                 | RAI14    | Homo sapiens |
| 5898      | v-ral simian leukemia viral oncogene homolog A (ras related)                             | RALA     | Homo sapiens |
| 5899      | v-ral simian leukemia viral oncogene homolog B (ras related; GTP binding protein)        | RALB     | Homo sapiens |
| 100129773 | hypothetical LOC100129773; ralA binding protein 1                                        | RALBP1   | Homo sapiens |
| 10928     | hypothetical LOC100129773; ralA binding protein 1                                        | RALBP1   | Homo sapiens |
| 5900      | ral guanine nucleotide dissociation stimulator                                           | RALGDS   | Homo sapiens |
| 22913     | RNA binding protein, autoantigenic (hnRNP-associated with lethal yellow homolog (mouse)) | RALY     | Homo sapiens |
| 10267     | receptor (G protein-coupled) activity modifying protein 1                                | RAMP1    | Homo sapiens |
| 5901      | RAN, member RAS oncogene family                                                          | RAN      | Homo sapiens |
| 8498      | RAN binding protein 3                                                                    | RANBP3   | Homo sapiens |
| 26953     | RAN binding protein 6                                                                    | RANBP6   | Homo sapiens |
| 5905      | Ran GTPase activating protein 1                                                          | RANGAP1  | Homo sapiens |
| 5906      | RAP1A, member of RAS oncogene family                                                     | RAP1A    | Homo sapiens |
| 5910      | RAP1, GTP-GDP dissociation stimulator 1                                                  | RAP1GDS1 | Homo sapiens |
| 5911      | RAP2A, member of RAS oncogene family                                                     | RAP2A    | Homo sapiens |
| 5912      | RAP2B, member of RAS oncogene family                                                     | RAP2B    | Homo sapiens |
| 2889      | Rap guanine nucleotide exchange factor (GEF) 1                                           | RAPGEF1  | Homo sapiens |
| 10411     | Rap guanine nucleotide exchange factor (GEF) 3                                           | RAPGEF3  | Homo sapiens |
| 11069     | Rap guanine nucleotide exchange factor (GEF) 4                                           | RAPGEF4  | Homo sapiens |
| 65059     | Ras association (RalGDS/AF-6) and pleckstrin homology domains 1                          | RAPH1    | Homo sapiens |
| 5914      | retinoic acid receptor, alpha                                                            | RARA     | Homo sapiens |
| 5918      | retinoic acid receptor responder (tazarotene induced) 1                                  | RARRES1  | Homo sapiens |
| 5919      | retinoic acid receptor responder (tazarotene induced) 2                                  | RARRES2  | Homo sapiens |
| 5920      | retinoic acid receptor responder (tazarotene induced) 3                                  | RARRES3  | Homo sapiens |
| 5917      | arginyl-tRNA synthetase                                                                  | RARS     | Homo sapiens |
| 5921      | RAS p21 protein activator (GTPase activating protein) 1                                  | RASA1    | Homo sapiens |
| 9462      | RAS protein activator like 2                                                             | RASAL2   | Homo sapiens |
| 5923      | Ras protein-specific guanine nucleotide-releasing factor 1                               | RASGRF1  | Homo sapiens |
| 10125     | RAS guanyl releasing protein 1 (calcium and DAG-regulated)                               | RASGRP1  | Homo sapiens |
| 25780     | RAS guanyl releasing protein 3 (calcium and DAG-regulated)                               | RASGRP3  | Homo sapiens |
| 11186     | Ras association (RalGDS/AF-6) domain family member 1                                     | RASSF1   | Homo sapiens |
| 9770      | Ras association (RalGDS/AF-6) domain family member 2                                     | RASSF2   | Homo sapiens |
| 5928      | hypothetical LOC642954; retinoblastoma binding protein 4                                 | RBBP4    | Homo sapiens |
| 642954    | hypothetical LOC642954; retinoblastoma binding protein 4                                 | RBBP4    | Homo sapiens |
| 5929      | retinoblastoma binding protein 5                                                         | RBBP5    | Homo sapiens |
| 5931      | retinoblastoma binding protein 7                                                         | RBBP7    | Homo sapiens |
| 5932      | retinoblastoma binding protein 8                                                         | RBBP8    | Homo sapiens |
| 5933      | retinoblastoma-like 1 (p107)                                                             | RBL1     | Homo sapiens |

|       |                                                                             |        |              |
|-------|-----------------------------------------------------------------------------|--------|--------------|
| 8241  | RNA binding motif protein 10                                                | RBM10  | Homo sapiens |
| 84991 | RNA binding motif protein 17                                                | RBM17  | Homo sapiens |
| 5935  | RNA binding motif (RNP1, RRM) protein 3                                     | RBM3   | Homo sapiens |
| 5936  | RNA binding motif protein 14; RNA binding motif protein 4                   | RBM4   | Homo sapiens |
| 10432 | RNA binding motif protein 14; RNA binding motif protein 4                   | RBM4   | Homo sapiens |
| 9939  | RNA binding motif protein 8A                                                | RBM8A  | Homo sapiens |
| 23543 | RNA binding motif protein 9                                                 | RBM9   | Homo sapiens |
| 27303 | RNA binding motif, single stranded interacting protein                      | RBMS3  | Homo sapiens |
| 11030 | RNA binding protein with multiple splicing                                  | RBPMS  | Homo sapiens |
| 9986  | RCE1 homolog, prenyl protein peptidase ( <i>S. cerevisiae</i> )             | RCE1   | Homo sapiens |
| 25898 | ring finger and CHY zinc finger domain containing 1                         | RCHY1  | Homo sapiens |
| 5955  | reticulocalbin 2, EF-hand calcium binding domain                            | RCN2   | Homo sapiens |
| 7936  | RD RNA binding protein                                                      | RDBP   | Homo sapiens |
| 51109 | retinol dehydrogenase 11 (all-trans/9-cis/11-cis)                           | RDH11  | Homo sapiens |
| 5962  | radixin                                                                     | RDX    | Homo sapiens |
| 8434  | reversion-inducing-cysteine-rich protein with kazal motifs                  | RECK   | Homo sapiens |
| 9401  | RecQ protein-like 4                                                         | RECQL4 | Homo sapiens |
| 5969  | regenerating islet-derived 1 alpha; regenerating islet-derived 1 pseudogene | REG1A  | Homo sapiens |
| 5967  | regenerating islet-derived 1 alpha; regenerating islet-derived 1 pseudogene | REG1A  | Homo sapiens |
| 5966  | v-rel reticuloendotheliosis viral oncogene homolog (avian)                  | REL    | Homo sapiens |
| 5972  | renin                                                                       | REN    | Homo sapiens |
| 9185  | RALBP1 associated Eps domain containing 2                                   | REPS2  | Homo sapiens |
| 5980  | REV3-like, catalytic subunit of DNA polymerase zeta (yeast)                 | REV3L  | Homo sapiens |
| 5982  | replication factor C (activator 1) 2, 40kDa                                 | RFC2   | Homo sapiens |
| 5983  | replication factor C (activator 1) 3, 38kDa                                 | RFC3   | Homo sapiens |
| 5984  | replication factor C (activator 1) 4, 37kDa                                 | RFC4   | Homo sapiens |
| 55312 | riboflavin kinase                                                           | RFK    | Homo sapiens |
| 5990  | regulatory factor X, 2 (influences HLA class II expression)                 | RFX2   | Homo sapiens |
| 5991  | regulatory factor X, 3 (influences HLA class II expression)                 | RFX3   | Homo sapiens |
| 5993  | regulatory factor X, 5 (influences HLA class II expression)                 | RFX5   | Homo sapiens |
| 8625  | regulatory factor X-associated ankyrin-containing protein                   | RFXANK | Homo sapiens |
| 5994  | regulatory factor X-associated protein                                      | RFXAP  | Homo sapiens |
| 23179 | ral guanine nucleotide dissociation stimulator-like 1                       | RGL1   | Homo sapiens |
| 5863  | ral guanine nucleotide dissociation stimulator-like 2                       | RGL2   | Homo sapiens |
| 9104  | regucalcin (senescence marker protein-30)                                   | RGN    | Homo sapiens |
| 5995  | retinal G protein coupled receptor                                          | RGR    | Homo sapiens |
| 8786  | regulator of G-protein signaling 11                                         | RGS11  | Homo sapiens |
| 6002  | regulator of G-protein signaling 12                                         | RGS12  | Homo sapiens |
| 6003  | regulator of G-protein signaling 13                                         | RGS13  | Homo sapiens |
| 6004  | regulator of G-protein signaling 16                                         | RGS16  | Homo sapiens |
| 10287 | regulator of G-protein signaling 19                                         | RGS19  | Homo sapiens |
| 5997  | regulator of G-protein signaling 2, 24kDa                                   | RGS2   | Homo sapiens |
| 8601  | regulator of G-protein signaling 20                                         | RGS20  | Homo sapiens |
| 5998  | regulator of G-protein signaling 3                                          | RGS3   | Homo sapiens |

|        |                                                                                                                             |          |              |
|--------|-----------------------------------------------------------------------------------------------------------------------------|----------|--------------|
| 5999   | regulator of G-protein signaling 4                                                                                          | RGS4     | Homo sapiens |
| 8490   | regulator of G-protein signaling 5                                                                                          | RGS5     | Homo sapiens |
| 9628   | regulator of G-protein signaling 6                                                                                          | RGS6     | Homo sapiens |
| 6000   | regulator of G-protein signaling 7                                                                                          | RGS7     | Homo sapiens |
| 6005   | Rh-associated glycoprotein                                                                                                  | RHAG     | Homo sapiens |
| 64285  | rhomboid 5 homolog 1 (Drosophila)                                                                                           | RHBDF1   | Homo sapiens |
| 6009   | Ras homolog enriched in brain                                                                                               | RHEB     | Homo sapiens |
| 388    | ras homolog gene family, member B                                                                                           | RHOB     | Homo sapiens |
| 391    | ras homolog gene family, member G (rho G)                                                                                   | RHOG     | Homo sapiens |
| 399    | ras homolog gene family, member H                                                                                           | RHOH     | Homo sapiens |
| 26150  | RIB43A domain with coiled-coils 2                                                                                           | RIBC2    | Homo sapiens |
| 9610   | Ras and Rab interactor 1                                                                                                    | RIN1     | Homo sapiens |
| 6015   | ring finger protein 1                                                                                                       | RING1    | Homo sapiens |
| 8780   | RIO kinase 3 (yeast)                                                                                                        | RIOK3    | Homo sapiens |
| 8737   | receptor (TNFRSF)-interacting serine-threonine kinase 1                                                                     | RIPK1    | Homo sapiens |
| 8767   | receptor-interacting serine-threonine kinase 2                                                                              | RIPK2    | Homo sapiens |
| 6014   | Ras-like without CAAX 2                                                                                                     | RIT2     | Homo sapiens |
| 6017   | retinaldehyde binding protein 1                                                                                             | RLBP1    | Homo sapiens |
| 6013   | relaxin 1                                                                                                                   | RLN1     | Homo sapiens |
| 6019   | relaxin 2                                                                                                                   | RLN2     | Homo sapiens |
| 6035   | ribonuclease, RNase A family, 1 (pancreatic)                                                                                | RNASE1   | Homo sapiens |
| 6036   | ribonuclease, RNase A family, 2 (liver, eosinophil-derived neurotoxin)                                                      | RNASE2   | Homo sapiens |
| 6039   | ribonuclease, RNase A family, k6                                                                                            | RNASE6   | Homo sapiens |
| 10535  | ribonuclease H2, subunit A                                                                                                  | RNASEH2A | Homo sapiens |
| 27289  | Rho family GTPase 1                                                                                                         | RND1     | Homo sapiens |
| 9921   | ring finger protein 10                                                                                                      | RNF10    | Homo sapiens |
| 51652  | vacuolar protein sorting 24 homolog (S. cerevisiae); ring finger protein 103                                                | RNF103   | Homo sapiens |
| 7844   | vacuolar protein sorting 24 homolog (S. cerevisiae); ring finger protein 103                                                | RNF103   | Homo sapiens |
| 79589  | ring finger protein 128                                                                                                     | RNF128   | Homo sapiens |
| 11342  | ring finger protein 13                                                                                                      | RNF13    | Homo sapiens |
| 11236  | ring finger protein 139                                                                                                     | RNF139   | Homo sapiens |
| 9604   | ring finger protein 14                                                                                                      | RNF14    | Homo sapiens |
| 26001  | ring finger protein 167                                                                                                     | RNF167   | Homo sapiens |
| 9810   | ring finger protein 40                                                                                                      | RNF40    | Homo sapiens |
| 10193  | ring finger protein 41                                                                                                      | RNF41    | Homo sapiens |
| 22838  | ring finger protein 44                                                                                                      | RNF44    | Homo sapiens |
| 6049   | ring finger protein (C3H2C3 type) 6                                                                                         | RNF6     | Homo sapiens |
| 9616   | ring finger protein 7                                                                                                       | RNF7     | Homo sapiens |
| 642132 | roundabout, axon guidance receptor, homolog 1 (Drosophila); similar to roundabout 1 isoform b                               | ROBO1    | Homo sapiens |
| 6091   | roundabout, axon guidance receptor, homolog 1 (Drosophila); similar to roundabout 1 isoform b                               | ROBO1    | Homo sapiens |
| 6092   | roundabout, axon guidance receptor, homolog 2 (Drosophila)                                                                  | ROBO2    | Homo sapiens |
| 6093   | similar to Rho-associated, coiled-coil containing protein kinase 1; Rho-associated, coiled-coil containing protein kinase 1 | ROCK1    | Homo sapiens |

|           |                                                                                                                                                                                                                                                                                                                                                                                                                                                                                                     |         |              |
|-----------|-----------------------------------------------------------------------------------------------------------------------------------------------------------------------------------------------------------------------------------------------------------------------------------------------------------------------------------------------------------------------------------------------------------------------------------------------------------------------------------------------------|---------|--------------|
| 727758    | similar to Rho-associated, coiled-coil containing protein kinase 1;<br>Rho-associated, coiled-coil containing protein kinase 1                                                                                                                                                                                                                                                                                                                                                                      | ROCK1   | Homo sapiens |
| 9991      | ROD1 regulator of differentiation 1 (S. pombe)                                                                                                                                                                                                                                                                                                                                                                                                                                                      | ROD1    | Homo sapiens |
| 6094      | retinal outer segment membrane protein 1                                                                                                                                                                                                                                                                                                                                                                                                                                                            | ROM1    | Homo sapiens |
| 4920      | receptor tyrosine kinase-like orphan receptor 2                                                                                                                                                                                                                                                                                                                                                                                                                                                     | ROR2    | Homo sapiens |
| 6095      | RAR-related orphan receptor A                                                                                                                                                                                                                                                                                                                                                                                                                                                                       | RORA    | Homo sapiens |
| 6097      | RAR-related orphan receptor C                                                                                                                                                                                                                                                                                                                                                                                                                                                                       | RORC    | Homo sapiens |
| 6102      | retinitis pigmentosa 2 (X-linked recessive)                                                                                                                                                                                                                                                                                                                                                                                                                                                         | RP2     | Homo sapiens |
| 6117      | replication protein A1, 70kDa                                                                                                                                                                                                                                                                                                                                                                                                                                                                       | RPA1    | Homo sapiens |
| 6118      | replication protein A2, 32kDa                                                                                                                                                                                                                                                                                                                                                                                                                                                                       | RPA2    | Homo sapiens |
| 6119      | replication protein A3, 14kDa                                                                                                                                                                                                                                                                                                                                                                                                                                                                       | RPA3    | Homo sapiens |
| 6120      | rcRPE; ribulose-5-phosphate-3-epimerase                                                                                                                                                                                                                                                                                                                                                                                                                                                             | RPE     | Homo sapiens |
| 729020    | rcRPE; ribulose-5-phosphate-3-epimerase                                                                                                                                                                                                                                                                                                                                                                                                                                                             | RPE     | Homo sapiens |
| 6103      | retinitis pigmentosa GTPase regulator                                                                                                                                                                                                                                                                                                                                                                                                                                                               | RPGR    | Homo sapiens |
| 22934     | ribose 5-phosphate isomerase A                                                                                                                                                                                                                                                                                                                                                                                                                                                                      | RPIA    | Homo sapiens |
| 6135      | ribosomal protein L11                                                                                                                                                                                                                                                                                                                                                                                                                                                                               | RPL11   | Homo sapiens |
| 100129424 | ribosomal protein L19; ribosomal protein L19 pseudogene 12                                                                                                                                                                                                                                                                                                                                                                                                                                          | RPL19   | Homo sapiens |
| 6143      | ribosomal protein L19; ribosomal protein L19 pseudogene 12                                                                                                                                                                                                                                                                                                                                                                                                                                          | RPL19   | Homo sapiens |
| 6155      | ribosomal protein L27                                                                                                                                                                                                                                                                                                                                                                                                                                                                               | RPL27   | Homo sapiens |
| 6158      | ribosomal protein L28                                                                                                                                                                                                                                                                                                                                                                                                                                                                               | RPL28   | Homo sapiens |
| 6166      | ribosomal protein L36a-like                                                                                                                                                                                                                                                                                                                                                                                                                                                                         | RPL36AL | Homo sapiens |
| 6184      | ribophorin I                                                                                                                                                                                                                                                                                                                                                                                                                                                                                        | RPN1    | Homo sapiens |
| 6185      | ribophorin II                                                                                                                                                                                                                                                                                                                                                                                                                                                                                       | RPN2    | Homo sapiens |
| 11102     | ribonuclease P/MRP 14kDa subunit                                                                                                                                                                                                                                                                                                                                                                                                                                                                    | RPP14   | Homo sapiens |
| 10556     | ribonuclease P/MRP 30kDa subunit                                                                                                                                                                                                                                                                                                                                                                                                                                                                    | RPP30   | Homo sapiens |
| 645630    | ribosomal protein S13 pseudogene 8; ribosomal protein S13;<br>ribosomal protein S13 pseudogene 2                                                                                                                                                                                                                                                                                                                                                                                                    | RPS13   | Homo sapiens |
| 6207      | ribosomal protein S13 pseudogene 8; ribosomal protein S13;<br>ribosomal protein S13 pseudogene 2                                                                                                                                                                                                                                                                                                                                                                                                    | RPS13   | Homo sapiens |
| 729236    | ribosomal protein S13 pseudogene 8; ribosomal protein S13;<br>ribosomal protein S13 pseudogene 2                                                                                                                                                                                                                                                                                                                                                                                                    | RPS13   | Homo sapiens |
| 6208      | ribosomal protein S14                                                                                                                                                                                                                                                                                                                                                                                                                                                                               | RPS14   | Homo sapiens |
| 6228      | ribosomal protein S23                                                                                                                                                                                                                                                                                                                                                                                                                                                                               | RPS23   | Homo sapiens |
| 6229      | ribosomal protein S24                                                                                                                                                                                                                                                                                                                                                                                                                                                                               | RPS24   | Homo sapiens |
| 392256    | ribosomal protein S26 pseudogene 38; ribosomal protein S26<br>pseudogene 39; ribosomal protein S26 pseudogene 35; ribosomal<br>protein S26 pseudogene 31; ribosomal protein S26 pseudogene 20;<br>ribosomal protein S26 pseudogene 54; ribosomal protein S26<br>pseudogene 2; ribosomal protein S26 pseudogene 53; ribosomal<br>protein S26 pseudogene 25; ribosomal protein S26 pseudogene 50;<br>ribosomal protein S26 pseudogene 6; ribosomal protein S26<br>pseudogene 8; ribosomal protein S26 | RPS26   | Homo sapiens |
| 646753    | ribosomal protein S26 pseudogene 38; ribosomal protein S26<br>pseudogene 39; ribosomal protein S26 pseudogene 35; ribosomal<br>protein S26 pseudogene 31; ribosomal protein S26 pseudogene 20;<br>ribosomal protein S26 pseudogene 54; ribosomal protein S26<br>pseudogene 2; ribosomal protein S26 pseudogene 53; ribosomal<br>protein S26 pseudogene 25; ribosomal protein S26 pseudogene 50;<br>ribosomal protein S26 pseudogene 6; ribosomal protein S26                                        | RPS26   | Homo sapiens |





|           |                                                                                                       |         |              |
|-----------|-------------------------------------------------------------------------------------------------------|---------|--------------|
| 729389    | ribosomal protein S6 pseudogene 25; ribosomal protein S6; ribosomal protein S6 pseudogene 1           | RPS6    | Homo sapiens |
| 440086    | ribosomal protein S6 pseudogene 25; ribosomal protein S6; ribosomal protein S6 pseudogene 1           | RPS6    | Homo sapiens |
| 6194      | ribosomal protein S6 pseudogene 25; ribosomal protein S6; ribosomal protein S6 pseudogene 1           | RPS6    | Homo sapiens |
| 6195      | ribosomal protein S6 kinase, 90kDa, polypeptide 1                                                     | RPS6KA1 | Homo sapiens |
| 6196      | ribosomal protein S6 kinase, 90kDa, polypeptide 2; hypothetical LOC100127984                          | RPS6KA2 | Homo sapiens |
| 100127984 | ribosomal protein S6 kinase, 90kDa, polypeptide 2; hypothetical LOC100127984                          | RPS6KA2 | Homo sapiens |
| 8986      | ribosomal protein S6 kinase, 90kDa, polypeptide 4                                                     | RPS6KA4 | Homo sapiens |
| 6198      | ribosomal protein S6 kinase, 70kDa, polypeptide 1                                                     | RPS6KB1 | Homo sapiens |
| 6199      | ribosomal protein S6 kinase, 70kDa, polypeptide 2                                                     | RPS6KB2 | Homo sapiens |
| 6203      | ribosomal protein S9; ribosomal protein S9 pseudogene 4                                               | RPS9    | Homo sapiens |
| 388556    | ribosomal protein S9; ribosomal protein S9 pseudogene 4                                               | RPS9    | Homo sapiens |
| 9125      | RCD1 required for cell differentiation1 homolog (S. pombe)                                            | RQCD1   | Homo sapiens |
| 10670     | Ras-related GTP binding A                                                                             | RRAGA   | Homo sapiens |
| 10325     | Ras-related GTP binding B                                                                             | RRAGB   | Homo sapiens |
| 58528     | Ras-related GTP binding D                                                                             | RRAGD   | Homo sapiens |
| 6237      | related RAS viral (r-ras) oncogene homolog                                                            | RRAS    | Homo sapiens |
| 100133211 | related RAS viral (r-ras) oncogene homolog 2; similar to related RAS viral (r-ras) oncogene homolog 2 | RRAS2   | Homo sapiens |
| 22800     | related RAS viral (r-ras) oncogene homolog 2; similar to related RAS viral (r-ras) oncogene homolog 2 | RRAS2   | Homo sapiens |
| 6238      | ribosome binding protein 1 homolog 180kDa (dog)                                                       | RRBP1   | Homo sapiens |
| 6240      | ribonucleotide reductase M1                                                                           | RRM1    | Homo sapiens |
| 6241      | ribonucleotide reductase M2 polypeptide                                                               | RRM2    | Homo sapiens |
| 50484     | ribonucleotide reductase M2 B (TP53 inducible)                                                        | RRM2B   | Homo sapiens |
| 54700     | RRN3 RNA polymerase I transcription factor homolog (S. cerevisiae)                                    | RRN3    | Homo sapiens |
| 54665     | round spermatid basic protein 1                                                                       | RSBN1   | Homo sapiens |
| 6251      | Ras suppressor protein 1                                                                              | RSU1    | Homo sapiens |
| 8634      | RNA terminal phosphate cyclase domain 1                                                               | RTCD1   | Homo sapiens |
| 6242      | rhotekin                                                                                              | RTKN    | Homo sapiens |
| 6252      | reticulon 1                                                                                           | RTN1    | Homo sapiens |
| 6253      | reticulon 2                                                                                           | RTN2    | Homo sapiens |
| 57142     | reticulon 4                                                                                           | RTN4    | Homo sapiens |
| 861       | runt-related transcription factor 1                                                                   | RUNX1   | Homo sapiens |
| 860       | runt-related transcription factor 2                                                                   | RUNX2   | Homo sapiens |
| 864       | runt-related transcription factor 3                                                                   | RUNX3   | Homo sapiens |
| 8607      | RuvB-like 1 (E. coli)                                                                                 | RUVBL1  | Homo sapiens |
| 6258      | retinoid X receptor, gamma                                                                            | RXRG    | Homo sapiens |
| 23429     | RING1 and YY1 binding protein                                                                         | RYBP    | Homo sapiens |
| 6263      | ryanodine receptor 3                                                                                  | RYR3    | Homo sapiens |
| 6271      | S100 calcium binding protein A1                                                                       | S100A1  | Homo sapiens |
| 729659    | S100 calcium binding protein A11; S100 calcium binding protein A11 pseudogene                         | S100A11 | Homo sapiens |
| 6282      | S100 calcium binding protein A11; S100 calcium binding protein A11                                    | S100A11 | Homo sapiens |



|           |                                                                            |         |              |
|-----------|----------------------------------------------------------------------------|---------|--------------|
|           | pseudogene                                                                 |         |              |
| 6283      | S100 calcium binding protein A12                                           | S100A12 | Homo sapiens |
| 6284      | S100 calcium binding protein A13                                           | S100A13 | Homo sapiens |
| 6273      | S100 calcium binding protein A2                                            | S100A2  | Homo sapiens |
| 6275      | S100 calcium binding protein A4                                            | S100A4  | Homo sapiens |
| 6277      | S100 calcium binding protein A6                                            | S100A6  | Homo sapiens |
| 6279      | S100 calcium binding protein A8                                            | S100A8  | Homo sapiens |
| 6280      | S100 calcium binding protein A9                                            | S100A9  | Homo sapiens |
| 6285      | S100 calcium binding protein B                                             | S100B   | Homo sapiens |
| 26278     | spastic ataxia of Charlevoix-Saguenay (sacsin)                             | SACS    | Homo sapiens |
| 25939     | SAM domain and HD domain 1                                                 | SAMHD1  | Homo sapiens |
| 8819      | Sin3A-associated protein, 30kDa                                            | SAP30   | Homo sapiens |
| 1757      | sarcosine dehydrogenase                                                    | SARDH   | Homo sapiens |
| 6301      | seryl-tRNA synthetase                                                      | SARS    | Homo sapiens |
| 9092      | squamous cell carcinoma antigen recognized by T cells                      | SART1   | Homo sapiens |
| 9733      | squamous cell carcinoma antigen recognized by T cells 3                    | SART3   | Homo sapiens |
| 6304      | SATB homeobox 1                                                            | SATB1   | Homo sapiens |
| 23314     | SATB homeobox 2                                                            | SATB2   | Homo sapiens |
| 100133234 | SET binding factor 1; SET binding factor 1 pseudogene 1                    | SBF1    | Homo sapiens |
| 6305      | SET binding factor 1; SET binding factor 1 pseudogene 1                    | SBF1    | Homo sapiens |
| 6307      | sterol-C4-methyl oxidase-like                                              | SC4MOL  | Homo sapiens |
| 6309      | sterol-C5-desaturase (ERG3 delta-5-desaturase homolog, S. cerevisiae)-like | SC5DL   | Homo sapiens |
| 9522      | secretory carrier membrane protein 1                                       | SCAMP1  | Homo sapiens |
| 54581     | SCAN domain containing 2 pseudogene                                        | SCAND2  | Homo sapiens |
| 949       | scavenger receptor class B, member 1                                       | SCARB1  | Homo sapiens |
| 950       | scavenger receptor class B, member 2                                       | SCARB2  | Homo sapiens |
| 6319      | stearoyl-CoA desaturase (delta-9-desaturase)                               | SCD     | Homo sapiens |
| 23256     | sec1 family domain containing 1                                            | SCFD1   | Homo sapiens |
| 7857      | secretogranin II (chromogranin C)                                          | SCG2    | Homo sapiens |
| 7356      | secretoglobin, family 1A, member 1 (uteroglobin)                           | SCGB1A1 | Homo sapiens |
| 4246      | secretoglobin, family 2A, member 1                                         | SCGB2A1 | Homo sapiens |
| 4250      | secretoglobin, family 2A, member 2                                         | SCGB2A2 | Homo sapiens |
| 10590     | secretagogin, EF-hand calcium binding protein                              | SCGN    | Homo sapiens |
| 29970     | schwannomin interacting protein 1                                          | SCHIP1  | Homo sapiens |
| 85477     | scinderin                                                                  | SCIN    | Homo sapiens |
| 10389     | sex comb on midleg-like 2 (Drosophila)                                     | SCML2   | Homo sapiens |
| 6324      | sodium channel, voltage-gated, type I, beta                                | SCN1B   | Homo sapiens |
| 6335      | sodium channel, voltage-gated, type IX, alpha subunit                      | SCN9A   | Homo sapiens |
| 6337      | sodium channel, nonvoltage-gated 1 alpha                                   | SCNN1A  | Homo sapiens |
| 6338      | sodium channel, nonvoltage-gated 1, beta                                   | SCNN1B  | Homo sapiens |
| 6339      | sodium channel, nonvoltage-gated 1, delta                                  | SCNN1D  | Homo sapiens |
| 6342      | sterol carrier protein 2                                                   | SCP2    | Homo sapiens |
| 6382      | syndecan 1                                                                 | SDC1    | Homo sapiens |
| 6383      | syndecan 2                                                                 | SDC2    | Homo sapiens |
| 9672      | syndecan 3                                                                 | SDC3    | Homo sapiens |

|        |                                                                                                                  |          |              |
|--------|------------------------------------------------------------------------------------------------------------------|----------|--------------|
| 6385   | syndecan 4                                                                                                       | SDC4     | Homo sapiens |
| 6386   | syndecan binding protein (syntenin)                                                                              | SDCBP    | Homo sapiens |
| 6388   | stromal cell-derived factor 2                                                                                    | SDF2     | Homo sapiens |
| 6389   | succinate dehydrogenase complex, subunit A, flavoprotein (Fp)                                                    | SDHA     | Homo sapiens |
| 6390   | succinate dehydrogenase complex, subunit B, iron sulfur (Ip)                                                     | SDHB     | Homo sapiens |
| 6391   | succinate dehydrogenase complex, subunit C, integral membrane protein, 15kDa                                     | SDHC     | Homo sapiens |
| 730351 | sidekick homolog 1, cell adhesion molecule (chicken); hypothetical LOC730351                                     | SDK1     | Homo sapiens |
| 221935 | sidekick homolog 1, cell adhesion molecule (chicken); hypothetical LOC730351                                     | SDK1     | Homo sapiens |
| 10993  | serine dehydratase                                                                                               | SDS      | Homo sapiens |
| 10483  | Sec23 homolog B ( <i>S. cerevisiae</i> )                                                                         | SEC23B   | Homo sapiens |
| 11196  | SEC23 interacting protein                                                                                        | SEC23IP  | Homo sapiens |
| 10427  | SEC24 family, member B ( <i>S. cerevisiae</i> )                                                                  | SEC24B   | Homo sapiens |
| 9871   | SEC24 family, member D ( <i>S. cerevisiae</i> )                                                                  | SEC24D   | Homo sapiens |
| 10952  | Sec61 beta subunit                                                                                               | SEC61B   | Homo sapiens |
| 23480  | Sec61 gamma subunit                                                                                              | SEC61G   | Homo sapiens |
| 6398   | secreted and transmembrane 1                                                                                     | SECTM1   | Homo sapiens |
| 6400   | sel-1 suppressor of lin-12-like ( <i>C. elegans</i> )                                                            | SEL1L    | Homo sapiens |
| 6401   | selectin E                                                                                                       | SELE     | Homo sapiens |
| 6402   | selectin L                                                                                                       | SELL     | Homo sapiens |
| 6403   | selectin P (granule membrane protein 140kDa, antigen CD62)                                                       | SELP     | Homo sapiens |
| 10371  | sema domain, immunoglobulin domain (Ig), short basic domain, secreted, (semaphorin) 3A                           | SEMA3A   | Homo sapiens |
| 10512  | sema domain, immunoglobulin domain (Ig), short basic domain, secreted, (semaphorin) 3C                           | SEMA3C   | Homo sapiens |
| 6405   | sema domain, immunoglobulin domain (Ig), short basic domain, secreted, (semaphorin) 3F                           | SEMA3F   | Homo sapiens |
| 10505  | sema domain, immunoglobulin domain (Ig), transmembrane domain (TM) and short cytoplasmic domain, (semaphorin) 4F | SEMA4F   | Homo sapiens |
| 57556  | sema domain, transmembrane domain (TM), and cytoplasmic domain, (semaphorin) 6A                                  | SEMA6A   | Homo sapiens |
| 6406   | semenogelin I                                                                                                    | SEMG1    | Homo sapiens |
| 6407   | semenogelin II                                                                                                   | SEMG2    | Homo sapiens |
| 205564 | SUMO1/sentrin specific peptidase 5                                                                               | SEN5     | Homo sapiens |
| 26054  | SUMO1/sentrin specific peptidase 6                                                                               | SEN6     | Homo sapiens |
| 22928  | selenophosphate synthetase 2                                                                                     | SEPHS2   | Homo sapiens |
| 6414   | selenoprotein P, plasma, 1                                                                                       | SEPP1    | Homo sapiens |
| 6415   | selenoprotein W, 1                                                                                               | SEPW1    | Homo sapiens |
| 12     | serpin peptidase inhibitor, clade A (alpha-1 antiproteinase, antitrypsin), member 3                              | SERPINA3 | Homo sapiens |
| 5267   | serpin peptidase inhibitor, clade A (alpha-1 antiproteinase, antitrypsin), member 4                              | SERPINA4 | Homo sapiens |
| 5104   | serpin peptidase inhibitor, clade A (alpha-1 antiproteinase, antitrypsin), member 5                              | SERPINA5 | Homo sapiens |
| 866    | serpin peptidase inhibitor, clade A (alpha-1 antiproteinase, antitrypsin), member 6                              | SERPINA6 | Homo sapiens |
| 1992   | serpin peptidase inhibitor, clade B (ovalbumin), member 1                                                        | SERPINB1 | Homo sapiens |

|        |                                                                                                        |          |              |
|--------|--------------------------------------------------------------------------------------------------------|----------|--------------|
| 5055   | serpin peptidase inhibitor, clade B (ovalbumin), member 2                                              | SERPINB2 | Homo sapiens |
| 5269   | serpin peptidase inhibitor, clade B (ovalbumin), member 6                                              | SERPINB6 | Homo sapiens |
| 8710   | serpin peptidase inhibitor, clade B (ovalbumin), member 7                                              | SERPINB7 | Homo sapiens |
| 5271   | serpin peptidase inhibitor, clade B (ovalbumin), member 8                                              | SERPINB8 | Homo sapiens |
| 5272   | serpin peptidase inhibitor, clade B (ovalbumin), member 9                                              | SERPINB9 | Homo sapiens |
| 462    | serpin peptidase inhibitor, clade C (antithrombin), member 1                                           | SERPINC1 | Homo sapiens |
| 5176   | serpin peptidase inhibitor, clade F (alpha-2 antiplasmin, pigment epithelium derived factor), member 1 | SERPINF1 | Homo sapiens |
| 710    | serpin peptidase inhibitor, clade G (C1 inhibitor), member 1                                           | SERPING1 | Homo sapiens |
| 871    | serpin peptidase inhibitor, clade H (heat shock protein 47), member 1, (collagen binding protein 1)    | SERPINH1 | Homo sapiens |
| 5274   | serpin peptidase inhibitor, clade I (neuroserpin), member 1                                            | SERPINI1 | Homo sapiens |
| 27244  | sestrin 1                                                                                              | SESN1    | Homo sapiens |
| 9869   | SET domain, bifurcated 1                                                                               | SETDB1   | Homo sapiens |
| 23544  | seizure related 6 homolog (mouse)-like                                                                 | SEZ6L    | Homo sapiens |
| 7536   | splicing factor 1                                                                                      | SF1      | Homo sapiens |
| 10291  | splicing factor 3a, subunit 1, 120kDa                                                                  | SF3A1    | Homo sapiens |
| 8175   | splicing factor 3a, subunit 2, 66kDa                                                                   | SF3A2    | Homo sapiens |
| 23451  | splicing factor 3b, subunit 1, 155kDa                                                                  | SF3B1    | Homo sapiens |
| 10992  | splicing factor 3b, subunit 2, 145kDa                                                                  | SF3B2    | Homo sapiens |
| 23450  | splicing factor 3b, subunit 3, 130kDa                                                                  | SF3B3    | Homo sapiens |
| 10262  | splicing factor 3b, subunit 4, 49kDa                                                                   | SF3B4    | Homo sapiens |
| 51460  | Scm-like with four mbt domains 1                                                                       | SFMBT1   | Homo sapiens |
| 6421   | splicing factor proline/glutamine-rich (polypyrimidine tract binding protein associated)               | SFPQ     | Homo sapiens |
| 6422   | secreted frizzled-related protein 1                                                                    | SFRP1    | Homo sapiens |
| 6424   | secreted frizzled-related protein 4                                                                    | SFRP4    | Homo sapiens |
| 6425   | secreted frizzled-related protein 5                                                                    | SFRP5    | Homo sapiens |
| 9295   | splicing factor, arginine/serine-rich 11                                                               | SFRS11   | Homo sapiens |
| 140890 | splicing factor, arginine/serine-rich 12                                                               | SFRS12   | Homo sapiens |
| 9169   | splicing factor, arginine/serine-rich 2, interacting protein                                           | SFRS2IP  | Homo sapiens |
| 6430   | splicing factor, arginine/serine-rich 5                                                                | SFRS5    | Homo sapiens |
| 8683   | splicing factor, arginine/serine-rich 9                                                                | SFRS9    | Homo sapiens |
| 6439   | surfactant protein B                                                                                   | SFTPB    | Homo sapiens |
| 6440   | surfactant protein C                                                                                   | SFTPC    | Homo sapiens |
| 6441   | surfactant protein D                                                                                   | SFTPD    | Homo sapiens |
| 6442   | sarcoglycan, alpha (50kDa dystrophin-associated glycoprotein)                                          | SGCA     | Homo sapiens |
| 6444   | sarcoglycan, delta (35kDa dystrophin-associated glycoprotein)                                          | SGCD     | Homo sapiens |
| 8910   | sarcoglycan, epsilon                                                                                   | SGCE     | Homo sapiens |
| 6445   | sarcoglycan, gamma (35kDa dystrophin-associated glycoprotein)                                          | SGCG     | Homo sapiens |
| 8879   | sphingosine-1-phosphate lyase 1                                                                        | SGPL1    | Homo sapiens |
| 4068   | SH2 domain protein 1A                                                                                  | SH2D1A   | Homo sapiens |
| 9047   | SH2 domain protein 2A                                                                                  | SH2D2A   | Homo sapiens |
| 6450   | SH3 domain binding glutamic acid-rich protein                                                          | SH3BGR   | Homo sapiens |
| 6452   | SH3-domain binding protein 2                                                                           | SH3BP2   | Homo sapiens |
| 6455   | SH3-domain GRB2-like 1                                                                                 | SH3GL1   | Homo sapiens |
| 6456   | SH3-domain GRB2-like 2                                                                                 | SH3GL2   | Homo sapiens |

|       |                                                                                     |         |              |
|-------|-------------------------------------------------------------------------------------|---------|--------------|
| 22941 | SH3 and multiple ankyrin repeat domains 2                                           | SHANK2  | Homo sapiens |
| 6462  | sex hormone-binding globulin                                                        | SHBG    | Homo sapiens |
| 6464  | SHC (Src homology 2 domain containing) transforming protein 1                       | SHC1    | Homo sapiens |
| 53358 | SHC (Src homology 2 domain containing) transforming protein 3                       | SHC3    | Homo sapiens |
| 7979  | split hand/foot malformation (ectrodactyly) type 1                                  | SHFM1   | Homo sapiens |
| 6470  | serine hydroxymethyltransferase 1 (soluble)                                         | SHMT1   | Homo sapiens |
| 6477  | seven in absentia homolog 1 (Drosophila)                                            | SIAH1   | Homo sapiens |
| 6478  | seven in absentia homolog 2 (Drosophila)                                            | SIAH2   | Homo sapiens |
| 946   | sialic acid binding Ig-like lectin 6                                                | SIGLEC6 | Homo sapiens |
| 6490  | silver homolog (mouse)                                                              | SILV    | Homo sapiens |
| 6493  | single-minded homolog 2 (Drosophila)                                                | SIM2    | Homo sapiens |
| 8487  | survival of motor neuron protein interacting protein 1                              | SIP1    | Homo sapiens |
| 6494  | signal-induced proliferation-associated 1                                           | SIPA1   | Homo sapiens |
| 22933 | sirtuin (silent mating type information regulation 2 homolog) 2 (S. cerevisiae)     | SIRT2   | Homo sapiens |
| 23408 | sirtuin (silent mating type information regulation 2 homolog) 5 (S. cerevisiae)     | SIRT5   | Homo sapiens |
| 6495  | SIX homeobox 1                                                                      | SIX1    | Homo sapiens |
| 51804 | SIX homeobox 4                                                                      | SIX4    | Homo sapiens |
| 6498  | SKI-like oncogene                                                                   | SKIL    | Homo sapiens |
| 6502  | S-phase kinase-associated protein 2 (p45)                                           | SKP2    | Homo sapiens |
| 6503  | Src-like-adaptor                                                                    | SLA     | Homo sapiens |
| 84174 | Src-like-adaptor 2                                                                  | SLA2    | Homo sapiens |
| 6504  | signaling lymphocytic activation molecule family member 1                           | SLAMF1  | Homo sapiens |
| 57823 | SLAM family member 7                                                                | SLAMF7  | Homo sapiens |
| 7884  | stem-loop binding protein                                                           | SLBP    | Homo sapiens |
| 6554  | solute carrier family 10 (sodium/bile acid cotransporter family), member 1          | SLC10A1 | Homo sapiens |
| 6555  | solute carrier family 10 (sodium/bile acid cotransporter family), member 2          | SLC10A2 | Homo sapiens |
| 6556  | solute carrier family 11 (proton-coupled divalent metal ion transporters), member 1 | SLC11A1 | Homo sapiens |
| 4891  | solute carrier family 11 (proton-coupled divalent metal ion transporters), member 2 | SLC11A2 | Homo sapiens |
| 6558  | solute carrier family 12 (sodium/potassium/chloride transporters), member 2         | SLC12A2 | Homo sapiens |
| 64849 | solute carrier family 13 (sodium-dependent dicarboxylate transporter), member 3     | SLC13A3 | Homo sapiens |
| 6563  | solute carrier family 14 (urea transporter), member 1 (Kidd blood group)            | SLC14A1 | Homo sapiens |
| 6564  | solute carrier family 15 (oligopeptide transporter), member 1                       | SLC15A1 | Homo sapiens |
| 6566  | solute carrier family 16, member 1 (monocarboxylic acid transporter 1)              | SLC16A1 | Homo sapiens |
| 6567  | solute carrier family 16, member 2 (monocarboxylic acid transporter 8)              | SLC16A2 | Homo sapiens |
| 9123  | solute carrier family 16, member 3 (monocarboxylic acid transporter 4)              | SLC16A3 | Homo sapiens |
| 9122  | solute carrier family 16, member 4 (monocarboxylic acid transporter 5)              | SLC16A4 | Homo sapiens |

|           |                                                                                                                       |          |              |
|-----------|-----------------------------------------------------------------------------------------------------------------------|----------|--------------|
| 100133772 | similar to MCT; solute carrier family 16, member 5 (monocarboxylic acid transporter 6)                                | SLC16A5  | Homo sapiens |
| 9121      | similar to MCT; solute carrier family 16, member 5 (monocarboxylic acid transporter 6)                                | SLC16A5  | Homo sapiens |
| 440459    | solute carrier family 16, member 6 (monocarboxylic acid transporter 7); similar to solute carrier family 16, member 6 | SLC16A6  | Homo sapiens |
| 9120      | solute carrier family 16, member 6 (monocarboxylic acid transporter 7); similar to solute carrier family 16, member 6 | SLC16A6  | Homo sapiens |
| 9194      | solute carrier family 16, member 7 (monocarboxylic acid transporter 2)                                                | SLC16A7  | Homo sapiens |
| 6568      | solute carrier family 17 (sodium phosphate), member 1                                                                 | SLC17A1  | Homo sapiens |
| 10246     | solute carrier family 17 (sodium phosphate), member 2                                                                 | SLC17A2  | Homo sapiens |
| 10786     | solute carrier family 17 (sodium phosphate), member 3                                                                 | SLC17A3  | Homo sapiens |
| 10050     | solute carrier family 17 (sodium phosphate), member 4                                                                 | SLC17A4  | Homo sapiens |
| 10560     | solute carrier family 19 (thiamine transporter), member 2                                                             | SLC19A2  | Homo sapiens |
| 6505      | solute carrier family 1 (neuronal/epithelial high affinity glutamate transporter, system Xag), member 1               | SLC1A1   | Homo sapiens |
| 6507      | solute carrier family 1 (glial high affinity glutamate transporter), member 3                                         | SLC1A3   | Homo sapiens |
| 6509      | solute carrier family 1 (glutamate/neutral amino acid transporter), member 4                                          | SLC1A4   | Homo sapiens |
| 6510      | solute carrier family 1 (neutral amino acid transporter), member 5                                                    | SLC1A5   | Homo sapiens |
| 6574      | solute carrier family 20 (phosphate transporter), member 1                                                            | SLC20A1  | Homo sapiens |
| 6575      | solute carrier family 20 (phosphate transporter), member 2                                                            | SLC20A2  | Homo sapiens |
| 6580      | solute carrier family 22 (organic cation transporter), member 1                                                       | SLC22A1  | Homo sapiens |
| 9389      | solute carrier family 22, member 14                                                                                   | SLC22A14 | Homo sapiens |
| 5002      | solute carrier family 22, member 18                                                                                   | SLC22A18 | Homo sapiens |
| 6582      | solute carrier family 22 (organic cation transporter), member 2                                                       | SLC22A2  | Homo sapiens |
| 6581      | solute carrier family 22 (extraneuronal monoamine transporter), member 3                                              | SLC22A3  | Homo sapiens |
| 6584      | solute carrier family 22 (organic cation/carnitine transporter), member 5                                             | SLC22A5  | Homo sapiens |
| 9356      | solute carrier family 22 (organic anion transporter), member 6                                                        | SLC22A6  | Homo sapiens |
| 9962      | solute carrier family 23 (nucleobase transporters), member 2                                                          | SLC23A2  | Homo sapiens |
| 10165     | solute carrier family 25, member 13 (citrin)                                                                          | SLC25A13 | Homo sapiens |
| 9016      | solute carrier family 25 (mitochondrial carrier, brain), member 14                                                    | SLC25A14 | Homo sapiens |
| 10478     | solute carrier family 25 (mitochondrial carrier; peroxisomal membrane protein, 34kDa), member 17                      | SLC25A17 | Homo sapiens |
| 788       | solute carrier family 25 (carnitine/acylcarnitine translocase), member 20                                             | SLC25A20 | Homo sapiens |
| 5250      | solute carrier family 25 (mitochondrial carrier; phosphate carrier), member 3                                         | SLC25A3  | Homo sapiens |
| 291       | solute carrier family 25 (mitochondrial carrier; adenine nucleotide translocator), member 4                           | SLC25A4  | Homo sapiens |
| 1836      | solute carrier family 26 (sulfate transporter), member 2                                                              | SLC26A2  | Homo sapiens |
| 1811      | solute carrier family 26, member 3                                                                                    | SLC26A3  | Homo sapiens |
| 5172      | solute carrier family 26, member 4                                                                                    | SLC26A4  | Homo sapiens |
| 11001     | solute carrier family 27 (fatty acid transporter), member 2                                                           | SLC27A2  | Homo sapiens |
| 11000     | solute carrier family 27 (fatty acid transporter), member 3                                                           | SLC27A3  | Homo sapiens |

|       |                                                                                        |         |              |
|-------|----------------------------------------------------------------------------------------|---------|--------------|
| 9154  | solute carrier family 28 (sodium-coupled nucleoside transporter), member 1             | SLC28A1 | Homo sapiens |
| 3177  | solute carrier family 29 (nucleoside transporters), member 2                           | SLC29A2 | Homo sapiens |
| 6513  | solute carrier family 2 (facilitated glucose transporter), member 1                    | SLC2A1  | Homo sapiens |
| 6514  | solute carrier family 2 (facilitated glucose transporter), member 2                    | SLC2A2  | Homo sapiens |
| 6515  | solute carrier family 2 (facilitated glucose transporter), member 3                    | SLC2A3  | Homo sapiens |
| 6517  | solute carrier family 2 (facilitated glucose transporter), member 4                    | SLC2A4  | Homo sapiens |
| 6518  | solute carrier family 2 (facilitated glucose/fructose transporter), member 5           | SLC2A5  | Homo sapiens |
| 7781  | solute carrier family 30 (zinc transporter), member 3                                  | SLC30A3 | Homo sapiens |
| 7782  | solute carrier family 30 (zinc transporter), member 4                                  | SLC30A4 | Homo sapiens |
| 10463 | solute carrier family 30 (zinc transporter), member 9                                  | SLC30A9 | Homo sapiens |
| 1317  | solute carrier family 31 (copper transporters), member 1                               | SLC31A1 | Homo sapiens |
| 1318  | solute carrier family 31 (copper transporters), member 2                               | SLC31A2 | Homo sapiens |
| 9197  | solute carrier family 33 (acetyl-CoA transporter), member 1                            | SLC33A1 | Homo sapiens |
| 10559 | solute carrier family 35 (CMP-sialic acid transporter), member A1                      | SLC35A1 | Homo sapiens |
| 23443 | solute carrier family 35 (UDP-N-acetylglucosamine (UDP-GlcNAc) transporter), member A3 | SLC35A3 | Homo sapiens |
| 10237 | solute carrier family 35, member B1                                                    | SLC35B1 | Homo sapiens |
| 11046 | solute carrier family 35, member D2                                                    | SLC35D2 | Homo sapiens |
| 10991 | solute carrier family 38, member 3                                                     | SLC38A3 | Homo sapiens |
| 25800 | solute carrier family 39 (zinc transporter), member 6                                  | SLC39A6 | Homo sapiens |
| 7922  | solute carrier family 39 (zinc transporter), member 7                                  | SLC39A7 | Homo sapiens |
| 64116 | solute carrier family 39 (zinc transporter), member 8                                  | SLC39A8 | Homo sapiens |
| 8501  | solute carrier family 43, member 1                                                     | SLC43A1 | Homo sapiens |
| 6508  | solute carrier family 4, anion exchanger, member 3                                     | SLC4A3  | Homo sapiens |
| 8671  | solute carrier family 4, sodium bicarbonate cotransporter, member 4                    | SLC4A4  | Homo sapiens |
| 9497  | solute carrier family 4, sodium bicarbonate cotransporter, member 7                    | SLC4A7  | Homo sapiens |
| 9498  | solute carrier family 4, sodium bicarbonate cotransporter, member 8                    | SLC4A8  | Homo sapiens |
| 6523  | solute carrier family 5 (sodium/glucose cotransporter), member 1                       | SLC5A1  | Homo sapiens |
| 6539  | solute carrier family 6 (neurotransmitter transporter, betaine/GABA), member 12        | SLC6A12 | Homo sapiens |
| 6530  | solute carrier family 6 (neurotransmitter transporter, noradrenalin), member 2         | SLC6A2  | Homo sapiens |
| 6531  | solute carrier family 6 (neurotransmitter transporter, dopamine), member 3             | SLC6A3  | Homo sapiens |
| 6532  | solute carrier family 6 (neurotransmitter transporter, serotonin), member 4            | SLC6A4  | Homo sapiens |
| 9152  | solute carrier family 6 (neurotransmitter transporter, glycine), member 5              | SLC6A5  | Homo sapiens |
| 6533  | solute carrier family 6 (neurotransmitter transporter, taurine), member 6              | SLC6A6  | Homo sapiens |
| 6535  | solute carrier family 6 (neurotransmitter transporter, creatine), member 8             | SLC6A8  | Homo sapiens |
| 6541  | solute carrier family 7 (cationic amino acid transporter, $\gamma^+$ system), member 1 | SLC7A1  | Homo sapiens |
| 6542  | solute carrier family 7 (cationic amino acid transporter, $\gamma^+$ system), member 2 | SLC7A2  | Homo sapiens |
| 8140  | solute carrier family 7 (cationic amino acid transporter, $\gamma^+$ system),          | SLC7A5  | Homo sapiens |

|       |                                                                                                   |          |              |
|-------|---------------------------------------------------------------------------------------------------|----------|--------------|
|       | member 5                                                                                          |          |              |
| 23428 | solute carrier family 7 (cationic amino acid transporter, y+ system), member 8                    | SLC7A8   | Homo sapiens |
| 6548  | solute carrier family 9 (sodium/hydrogen exchanger), member 1                                     | SLC9A1   | Homo sapiens |
| 9351  | solute carrier family 9 (sodium/hydrogen exchanger), member 3 regulator 2                         | SLC9A3R2 | Homo sapiens |
| 10479 | solute carrier family 9 (sodium/hydrogen exchanger), member 6                                     | SLC9A6   | Homo sapiens |
| 23315 | solute carrier family 9 (sodium/hydrogen exchanger), member 8                                     | SLC9A8   | Homo sapiens |
| 6579  | solute carrier organic anion transporter family, member 1A2                                       | SLCO1A2  | Homo sapiens |
| 6578  | solute carrier organic anion transporter family, member 2A1                                       | SLCO2A1  | Homo sapiens |
| 11309 | solute carrier organic anion transporter family, member 2B1                                       | SLCO2B1  | Homo sapiens |
| 28232 | solute carrier organic anion transporter family, member 3A1                                       | SLCO3A1  | Homo sapiens |
| 6585  | slit homolog 1 (Drosophila)                                                                       | SLIT1    | Homo sapiens |
| 9353  | slit homolog 2 (Drosophila)                                                                       | SLIT2    | Homo sapiens |
| 6586  | slit homolog 3 (Drosophila)                                                                       | SLIT3    | Homo sapiens |
| 6590  | secretory leukocyte peptidase inhibitor                                                           | SLPI     | Homo sapiens |
| 4086  | SMAD family member 1                                                                              | SMAD1    | Homo sapiens |
| 4087  | SMAD family member 2                                                                              | SMAD2    | Homo sapiens |
| 4088  | SMAD family member 3                                                                              | SMAD3    | Homo sapiens |
| 4090  | SMAD family member 5                                                                              | SMAD5    | Homo sapiens |
| 4091  | SMAD family member 6                                                                              | SMAD6    | Homo sapiens |
| 4092  | SMAD family member 7                                                                              | SMAD7    | Homo sapiens |
| 6594  | SWI/SNF related, matrix associated, actin dependent regulator of chromatin, subfamily a, member 1 | SMARCA1  | Homo sapiens |
| 6595  | SWI/SNF related, matrix associated, actin dependent regulator of chromatin, subfamily a, member 2 | SMARCA2  | Homo sapiens |
| 6597  | SWI/SNF related, matrix associated, actin dependent regulator of chromatin, subfamily a, member 4 | SMARCA4  | Homo sapiens |
| 8467  | SWI/SNF related, matrix associated, actin dependent regulator of chromatin, subfamily a, member 5 | SMARCA5  | Homo sapiens |
| 6599  | SWI/SNF related, matrix associated, actin dependent regulator of chromatin, subfamily c, member 1 | SMARCC1  | Homo sapiens |
| 6601  | SWI/SNF related, matrix associated, actin dependent regulator of chromatin, subfamily c, member 2 | SMARCC2  | Homo sapiens |
| 6602  | SWI/SNF related, matrix associated, actin dependent regulator of chromatin, subfamily d, member 1 | SMARCD1  | Homo sapiens |
| 6603  | SWI/SNF related, matrix associated, actin dependent regulator of chromatin, subfamily d, member 2 | SMARCD2  | Homo sapiens |
| 6604  | SWI/SNF related, matrix associated, actin dependent regulator of chromatin, subfamily d, member 3 | SMARCD3  | Homo sapiens |
| 6605  | SWI/SNF related, matrix associated, actin dependent regulator of chromatin, subfamily e, member 1 | SMARCE1  | Homo sapiens |
| 10285 | survival motor neuron domain containing 1                                                         | SMNDC1   | Homo sapiens |
| 6608  | smoothened homolog (Drosophila)                                                                   | SMO      | Homo sapiens |
| 64093 | SPARC related modular calcium binding 1                                                           | SMOC1    | Homo sapiens |
| 54498 | spermine oxidase                                                                                  | SMOX     | Homo sapiens |
| 6609  | sphingomyelin phosphodiesterase 1, acid lysosomal                                                 | SMPD1    | Homo sapiens |
| 55512 | sphingomyelin phosphodiesterase 3, neutral membrane (neutral sphingomyelinase II)                 | SMPD3    | Homo sapiens |

|           |                                                                                                                          |         |              |
|-----------|--------------------------------------------------------------------------------------------------------------------------|---------|--------------|
| 10924     | sphingomyelin phosphodiesterase, acid-like 3A                                                                            | SMPDL3A | Homo sapiens |
| 27293     | sphingomyelin phosphodiesterase, acid-like 3B                                                                            | SMPDL3B | Homo sapiens |
| 6525      | smoothelin                                                                                                               | SMTN    | Homo sapiens |
| 57154     | SMAD specific E3 ubiquitin protein ligase 1                                                                              | SMURF1  | Homo sapiens |
| 64750     | SMAD specific E3 ubiquitin protein ligase 2                                                                              | SMURF2  | Homo sapiens |
| 56950     | SET and MYND domain containing 2                                                                                         | SMYD2   | Homo sapiens |
| 10322     | SMYD family member 5                                                                                                     | SMYD5   | Homo sapiens |
| 6591      | snail homolog 2 (Drosophila)                                                                                             | SNAI2   | Homo sapiens |
| 8773      | synaptosomal-associated protein, 23kDa                                                                                   | SNAP23  | Homo sapiens |
| 6616      | synaptosomal-associated protein, 25kDa                                                                                   | SNAP25  | Homo sapiens |
| 6618      | small nuclear RNA activating complex, polypeptide 2, 45kDa                                                               | SNAPC2  | Homo sapiens |
| 6621      | small nuclear RNA activating complex, polypeptide 4, 190kDa                                                              | SNAPC4  | Homo sapiens |
| 6622      | synuclein, alpha (non A4 component of amyloid precursor)                                                                 | SNCA    | Homo sapiens |
| 6620      | synuclein, beta                                                                                                          | SNCB    | Homo sapiens |
| 6623      | synuclein, gamma (breast cancer-specific protein 1)                                                                      | SNCG    | Homo sapiens |
| 8303      | stannin                                                                                                                  | SNN     | Homo sapiens |
| 6626      | small nuclear ribonucleoprotein polypeptide A                                                                            | SNRPA   | Homo sapiens |
| 6628      | small nuclear ribonucleoprotein polypeptides B and B1                                                                    | SNRPB   | Homo sapiens |
| 6629      | small nuclear ribonucleoprotein polypeptide B''                                                                          | SNRPB2  | Homo sapiens |
| 6631      | small nuclear ribonucleoprotein polypeptide C                                                                            | SNRPC   | Homo sapiens |
| 6632      | small nuclear ribonucleoprotein D1 polypeptide 16kDa; hypothetical protein LOC100129492                                  | SNRPD1  | Homo sapiens |
| 100129492 | small nuclear ribonucleoprotein D1 polypeptide 16kDa; hypothetical protein LOC100129492                                  | SNRPD1  | Homo sapiens |
| 119358    | small nuclear ribonucleoprotein D2 polypeptide 16.5kDa; similar to hCG2040270                                            | SNRPD2  | Homo sapiens |
| 6633      | small nuclear ribonucleoprotein D2 polypeptide 16.5kDa; similar to hCG2040270                                            | SNRPD2  | Homo sapiens |
| 6634      | small nuclear ribonucleoprotein D3 polypeptide 18kDa                                                                     | SNRPD3  | Homo sapiens |
| 6635      | small nuclear ribonucleoprotein polypeptide E-like 1; small nuclear ribonucleoprotein polypeptide E; similar to hCG23490 | SNRPE   | Homo sapiens |
| 414153    | small nuclear ribonucleoprotein polypeptide E-like 1; small nuclear ribonucleoprotein polypeptide E; similar to hCG23490 | SNRPE   | Homo sapiens |
| 100130109 | small nuclear ribonucleoprotein polypeptide E-like 1; small nuclear ribonucleoprotein polypeptide E; similar to hCG23490 | SNRPE   | Homo sapiens |
| 6638      | small nuclear ribonucleoprotein polypeptide N; SNRPN upstream reading frame                                              | SNRPN   | Homo sapiens |
| 8926      | small nuclear ribonucleoprotein polypeptide N; SNRPN upstream reading frame                                              | SNRPN   | Homo sapiens |
| 6640      | syntrophin, alpha 1 (dystrophin-associated protein A1, 59kDa, acidic component)                                          | SNTA1   | Homo sapiens |
| 6641      | syntrophin, beta 1 (dystrophin-associated protein A1, 59kDa, basic component 1)                                          | SNTB1   | Homo sapiens |
| 6645      | syntrophin, beta 2 (dystrophin-associated protein A1, 59kDa, basic component 2)                                          | SNTB2   | Homo sapiens |
| 6642      | sorting nexin 1                                                                                                          | SNX1    | Homo sapiens |
| 23161     | sorting nexin 13                                                                                                         | SNX13   | Homo sapiens |
| 9784      | sorting nexin 17                                                                                                         | SNX17   | Homo sapiens |
| 8724      | sorting nexin 3                                                                                                          | SNX3    | Homo sapiens |



|       |                                                                         |         |              |
|-------|-------------------------------------------------------------------------|---------|--------------|
| 8723  | sorting nexin 4                                                         | SNX4    | Homo sapiens |
| 6646  | sterol O-acyltransferase 1                                              | SOAT1   | Homo sapiens |
| 8651  | suppressor of cytokine signaling 1                                      | SOCS1   | Homo sapiens |
| 8835  | suppressor of cytokine signaling 2                                      | SOCS2   | Homo sapiens |
| 9021  | suppressor of cytokine signaling 3                                      | SOCS3   | Homo sapiens |
| 9306  | suppressor of cytokine signaling 6                                      | SOCS6   | Homo sapiens |
| 30837 | suppressor of cytokine signaling 7                                      | SOCS7   | Homo sapiens |
| 6647  | superoxide dismutase 1, soluble                                         | SOD1    | Homo sapiens |
| 6648  | superoxide dismutase 2, mitochondrial                                   | SOD2    | Homo sapiens |
| 10580 | sorbin and SH3 domain containing 1                                      | SORBS1  | Homo sapiens |
| 6272  | sortilin 1                                                              | SORT1   | Homo sapiens |
| 6654  | son of sevenless homolog 1 (Drosophila)                                 | SOS1    | Homo sapiens |
| 6656  | SRY (sex determining region Y)-box 1                                    | SOX1    | Homo sapiens |
| 6663  | SRY (sex determining region Y)-box 10                                   | SOX10   | Homo sapiens |
| 6664  | SRY (sex determining region Y)-box 11                                   | SOX11   | Homo sapiens |
| 64321 | SRY (sex determining region Y)-box 17                                   | SOX17   | Homo sapiens |
| 54345 | SRY (sex determining region Y)-box 18                                   | SOX18   | Homo sapiens |
| 6657  | SRY (sex determining region Y)-box 2                                    | SOX2    | Homo sapiens |
| 6658  | SRY (sex determining region Y)-box 3                                    | SOX3    | Homo sapiens |
| 11063 | SRY (sex determining region Y)-box 30                                   | SOX30   | Homo sapiens |
| 6659  | SRY (sex determining region Y)-box 4                                    | SOX4    | Homo sapiens |
| 30812 | SRY (sex determining region Y)-box 8                                    | SOX8    | Homo sapiens |
| 6662  | SRY (sex determining region Y)-box 9                                    | SOX9    | Homo sapiens |
| 6667  | Sp1 transcription factor                                                | SP1     | Homo sapiens |
| 6672  | SP100 nuclear antigen                                                   | SP100   | Homo sapiens |
| 3431  | SP110 nuclear body protein                                              | SP110   | Homo sapiens |
| 11262 | SP140 nuclear body protein                                              | SP140   | Homo sapiens |
| 6668  | Sp2 transcription factor                                                | SP2     | Homo sapiens |
| 6671  | Sp4 transcription factor                                                | SP4     | Homo sapiens |
| 53340 | sperm autoantigenic protein 17                                          | SPA17   | Homo sapiens |
| 6674  | sperm associated antigen 1                                              | SPAG1   | Homo sapiens |
| 10615 | sperm associated antigen 5                                              | SPAG5   | Homo sapiens |
| 9576  | sperm associated antigen 6                                              | SPAG6   | Homo sapiens |
| 9552  | sperm associated antigen 7                                              | SPAG7   | Homo sapiens |
| 26206 | sperm associated antigen 8                                              | SPAG8   | Homo sapiens |
| 6677  | sperm adhesion molecule 1 (PH-20 hyaluronidase, zona pellucida binding) | SPAM1   | Homo sapiens |
| 6678  | secreted protein, acidic, cysteine-rich (osteonectin)                   | SPARC   | Homo sapiens |
| 8404  | SPARC-like 1 (hevin)                                                    | SPARCL1 | Homo sapiens |
| 9825  | spermatogenesis associated 2                                            | SPATA2  | Homo sapiens |
| 25803 | SAM pointed domain containing ets transcription factor                  | SPDEF   | Homo sapiens |
| 23111 | spastic paraplegia 20 (Troyer syndrome)                                 | SPG20   | Homo sapiens |
| 6687  | spastic paraplegia 7 (pure and complicated autosomal recessive)         | SPG7    | Homo sapiens |
| 8877  | sphingosine kinase 1                                                    | SPHK1   | Homo sapiens |
| 6688  | spleen focus forming virus (SFFV) proviral integration oncogene spi1    | SPI1    | Homo sapiens |
| 6689  | Spi-B transcription factor (Spi-1/PU.1 related)                         | SPIB    | Homo sapiens |

|           |                                                                                                      |        |              |
|-----------|------------------------------------------------------------------------------------------------------|--------|--------------|
| 6691      | serine peptidase inhibitor, Kazal type 2 (acrosin-trypsin inhibitor)                                 | SPINK2 | Homo sapiens |
| 6692      | serine peptidase inhibitor, Kunitz type 1                                                            | SPINT1 | Homo sapiens |
| 10653     | serine peptidase inhibitor, Kunitz type, 2                                                           | SPINT2 | Homo sapiens |
| 6693      | sialoporphin                                                                                         | SPN    | Homo sapiens |
| 9806      | sparc/osteonectin, cwcv and kazal-like domains proteoglycan (testican) 2                             | SPOCK2 | Homo sapiens |
| 10418     | spondin 1, extracellular matrix protein                                                              | SPON1  | Homo sapiens |
| 8405      | speckle-type POZ protein                                                                             | SPOP   | Homo sapiens |
| 6696      | secreted phosphoprotein 1                                                                            | SPP1   | Homo sapiens |
| 200734    | sprouty-related, EVH1 domain containing 2                                                            | SPRED2 | Homo sapiens |
| 6699      | small proline-rich protein 1B (cornifin)                                                             | SPRR1B | Homo sapiens |
| 10252     | sprouty homolog 1, antagonist of FGF signaling (Drosophila)                                          | SPRY1  | Homo sapiens |
| 10253     | sprouty homolog 2 (Drosophila)                                                                       | SPRY2  | Homo sapiens |
| 6709      | spectrin, alpha, non-erythrocytic 1 (alpha-fodrin)                                                   | SPTAN1 | Homo sapiens |
| 6711      | spectrin, beta, non-erythrocytic 1                                                                   | SPTBN1 | Homo sapiens |
| 10558     | serine palmitoyltransferase, long chain base subunit 1                                               | SPTLC1 | Homo sapiens |
| 9517      | serine palmitoyltransferase, long chain base subunit 2                                               | SPTLC2 | Homo sapiens |
| 6713      | squalene epoxidase                                                                                   | SQLE   | Homo sapiens |
| 10011     | steroid receptor RNA activator 1                                                                     | SRA1   | Homo sapiens |
| 6714      | v-src sarcoma (Schmidt-Ruppin A-2) viral oncogene homolog (avian)                                    | SRC    | Homo sapiens |
| 6715      | steroid-5-alpha-reductase, alpha polypeptide 1 (3-oxo-5 alpha-steroid delta 4-dehydrogenase alpha 1) | SRD5A1 | Homo sapiens |
| 6716      | steroid-5-alpha-reductase, alpha polypeptide 2 (3-oxo-5 alpha-steroid delta 4-dehydrogenase alpha 2) | SRD5A2 | Homo sapiens |
| 6720      | sterol regulatory element binding transcription factor 1                                             | SREBF1 | Homo sapiens |
| 6721      | sterol regulatory element binding transcription factor 2                                             | SREBF2 | Homo sapiens |
| 6722      | serum response factor (c-fos serum response element-binding transcription factor)                    | SRF    | Homo sapiens |
| 6717      | sorcin                                                                                               | SRI    | Homo sapiens |
| 6723      | spermidine synthase                                                                                  | SRM    | Homo sapiens |
| 6729      | similar to signal recognition particle 54kDa; signal recognition particle 54kDa                      | SRP54  | Homo sapiens |
| 650638    | similar to signal recognition particle 54kDa; signal recognition particle 54kDa                      | SRP54  | Homo sapiens |
| 6731      | signal recognition particle 72kDa                                                                    | SRP72  | Homo sapiens |
| 653226    | signal recognition particle 9-like 1; signal recognition particle 9kDa                               | SRP9   | Homo sapiens |
| 6726      | signal recognition particle 9-like 1; signal recognition particle 9kDa                               | SRP9   | Homo sapiens |
| 6732      | SFRS protein kinase 1                                                                                | SRPK1  | Homo sapiens |
| 6733      | SFRS protein kinase 2                                                                                | SRPK2  | Homo sapiens |
| 8406      | sushi-repeat-containing protein, X-linked                                                            | SRPX   | Homo sapiens |
| 27286     | sushi-repeat-containing protein, X-linked 2                                                          | SRPX2  | Homo sapiens |
| 10250     | serine/arginine repetitive matrix 1                                                                  | SRRM1  | Homo sapiens |
| 23524     | serine/arginine repetitive matrix 2; hypothetical LOC100132779                                       | SRRM2  | Homo sapiens |
| 100132779 | serine/arginine repetitive matrix 2; hypothetical LOC100132779                                       | SRRM2  | Homo sapiens |
| 6760      | synovial sarcoma translocation, chromosome 18                                                        | SS18   | Homo sapiens |
| 26039     | synovial sarcoma translocation gene on chromosome 18-like 1                                          | SS18L1 | Homo sapiens |
| 6741      | Sjogren syndrome antigen B (autoantigen La)                                                          | SSB    | Homo sapiens |

|       |                                                                                  |         |              |
|-------|----------------------------------------------------------------------------------|---------|--------------|
| 6742  | single-stranded DNA binding protein 1                                            | SSBP1   | Homo sapiens |
| 23635 | single-stranded DNA binding protein 2                                            | SSBP2   | Homo sapiens |
| 6744  | sperm specific antigen 2                                                         | SSFA2   | Homo sapiens |
| 8636  | Sjogren syndrome nuclear autoantigen 1                                           | SSNA1   | Homo sapiens |
| 8082  | sarcospan (Kras oncogene-associated gene)                                        | SSPN    | Homo sapiens |
| 6745  | signal sequence receptor, alpha                                                  | SSR1    | Homo sapiens |
| 6746  | signal sequence receptor, beta (translocon-associated protein beta)              | SSR2    | Homo sapiens |
| 6749  | structure specific recognition protein 1                                         | SSRP1   | Homo sapiens |
| 6750  | somatostatin                                                                     | SST     | Homo sapiens |
| 6751  | somatostatin receptor 1                                                          | SSTR1   | Homo sapiens |
| 6753  | somatostatin receptor 3                                                          | SSTR3   | Homo sapiens |
| 10214 | synovial sarcoma, X breakpoint 3                                                 | SSX3    | Homo sapiens |
| 6768  | suppression of tumorigenicity 14 (colon carcinoma)                               | ST14    | Homo sapiens |
| 9705  | suppression of tumorigenicity 18 (breast carcinoma) (zinc finger protein)        | ST18    | Homo sapiens |
| 10735 | stromal antigen 2                                                                | STAG2   | Homo sapiens |
| 8027  | signal transducing adaptor molecule (SH3 domain and ITAM motif) 1                | STAM    | Homo sapiens |
| 10254 | signal transducing adaptor molecule (SH3 domain and ITAM motif) 2                | STAM2   | Homo sapiens |
| 10617 | STAM binding protein                                                             | STAMBP  | Homo sapiens |
| 6770  | steroidogenic acute regulatory protein                                           | STAR    | Homo sapiens |
| 90627 | StAR-related lipid transfer (START) domain containing 13                         | STARD13 | Homo sapiens |
| 10948 | StAR-related lipid transfer (START) domain containing 3                          | STARD3  | Homo sapiens |
| 56910 | StAR-related lipid transfer (START) domain containing 7                          | STARD7  | Homo sapiens |
| 6772  | signal transducer and activator of transcription 1, 91kDa                        | STAT1   | Homo sapiens |
| 6773  | signal transducer and activator of transcription 2, 113kDa                       | STAT2   | Homo sapiens |
| 6774  | signal transducer and activator of transcription 3 (acute-phase response factor) | STAT3   | Homo sapiens |
| 6775  | signal transducer and activator of transcription 4                               | STAT4   | Homo sapiens |
| 6776  | signal transducer and activator of transcription 5A                              | STAT5A  | Homo sapiens |
| 6777  | signal transducer and activator of transcription 5B                              | STAT5B  | Homo sapiens |
| 27067 | staufer, RNA binding protein, homolog 2 (Drosophila)                             | STAU2   | Homo sapiens |
| 6781  | stanniocalcin 1                                                                  | STC1    | Homo sapiens |
| 10963 | stress-induced-phosphoprotein 1                                                  | STIP1   | Homo sapiens |
| 6793  | serine/threonine kinase 10                                                       | STK10   | Homo sapiens |
| 6794  | serine/threonine kinase 11                                                       | STK11   | Homo sapiens |
| 9263  | serine/threonine kinase 17a                                                      | STK17A  | Homo sapiens |
| 9262  | serine/threonine kinase 17b                                                      | STK17B  | Homo sapiens |
| 8428  | serine/threonine kinase 24 (STE20 homolog, yeast)                                | STK24   | Homo sapiens |
| 10494 | serine/threonine kinase 25 (STE20 homolog, yeast)                                | STK25   | Homo sapiens |
| 6788  | serine/threonine kinase 3 (STE20 homolog, yeast)                                 | STK3    | Homo sapiens |
| 11329 | serine/threonine kinase 38                                                       | STK38   | Homo sapiens |
| 23012 | serine/threonine kinase 38 like                                                  | STK38L  | Homo sapiens |
| 27347 | serine threonine kinase 39 (STE20/SPS1 homolog, yeast)                           | STK39   | Homo sapiens |
| 6789  | serine/threonine kinase 4                                                        | STK4    | Homo sapiens |
| 11075 | stathmin-like 2                                                                  | STMN2   | Homo sapiens |
| 50861 | stathmin-like 3                                                                  | STMN3   | Homo sapiens |

|        |                                                                                                     |         |              |
|--------|-----------------------------------------------------------------------------------------------------|---------|--------------|
| 9399   | stomatin (EPB72)-like 1                                                                             | STOML1  | Homo sapiens |
| 201254 | stimulated by retinoic acid 13 homolog (mouse)                                                      | STRA13  | Homo sapiens |
| 11171  | serine/threonine kinase receptor associated protein                                                 | STRAP   | Homo sapiens |
| 29966  | striatin, calmodulin binding protein 3                                                              | STRN3   | Homo sapiens |
| 412    | steroid sulfatase (microsomal), isozyme S                                                           | STS     | Homo sapiens |
| 8676   | syntaxin 11                                                                                         | STX11   | Homo sapiens |
| 8675   | syntaxin 16                                                                                         | STX16   | Homo sapiens |
| 6804   | syntaxin 1A (brain)                                                                                 | STX1A   | Homo sapiens |
| 10228  | syntaxin 6                                                                                          | STX6    | Homo sapiens |
| 8417   | syntaxin 7                                                                                          | STX7    | Homo sapiens |
| 6812   | syntaxin binding protein 1                                                                          | STXBP1  | Homo sapiens |
| 6814   | syntaxin binding protein 3                                                                          | STXBP3  | Homo sapiens |
| 8803   | succinate-CoA ligase, ADP-forming, beta subunit                                                     | SUCLA2  | Homo sapiens |
| 51684  | suppressor of fused homolog (Drosophila)                                                            | SUFU    | Homo sapiens |
| 23213  | sulfatase 1                                                                                         | SULF1   | Homo sapiens |
| 6819   | sulfotransferase family, cytosolic, 1C, member 2                                                    | SULT1C2 | Homo sapiens |
| 6820   | sulfotransferase family, cytosolic, 2B, member 1                                                    | SULT2B1 | Homo sapiens |
| 25830  | sulfotransferase family 4A, member 1                                                                | SULT4A1 | Homo sapiens |
| 474338 | SMT3 suppressor of mif two 3 homolog 1 (S. cerevisiae); SUMO1 pseudogene 3                          | SUMO1   | Homo sapiens |
| 7341   | SMT3 suppressor of mif two 3 homolog 1 (S. cerevisiae); SUMO1 pseudogene 3                          | SUMO1   | Homo sapiens |
| 6821   | sulfite oxidase                                                                                     | SUOX    | Homo sapiens |
| 11198  | suppressor of Ty 16 homolog (S. cerevisiae); suppressor of Ty 16 homolog (S. cerevisiae) pseudogene | SUPT16H | Homo sapiens |
| 400011 | suppressor of Ty 16 homolog (S. cerevisiae); suppressor of Ty 16 homolog (S. cerevisiae) pseudogene | SUPT16H | Homo sapiens |
| 6827   | suppressor of Ty 4 homolog 1 (S. cerevisiae)                                                        | SUPT4H1 | Homo sapiens |
| 6829   | suppressor of Ty 5 homolog (S. cerevisiae)                                                          | SUPT5H  | Homo sapiens |
| 6830   | suppressor of Ty 6 homolog (S. cerevisiae)                                                          | SUPT6H  | Homo sapiens |
| 6832   | suppressor of var1, 3-like 1 (S. cerevisiae)                                                        | SUPV3L1 | Homo sapiens |
| 6834   | surfeit 1                                                                                           | SURF1   | Homo sapiens |
| 6835   | surfeit 2                                                                                           | SURF2   | Homo sapiens |
| 6840   | supervillin                                                                                         | SVIL    | Homo sapiens |
| 6847   | synaptonemal complex protein 1                                                                      | SYCP1   | Homo sapiens |
| 10388  | synaptonemal complex protein 2                                                                      | SYCP2   | Homo sapiens |
| 6850   | spleen tyrosine kinase                                                                              | SYK     | Homo sapiens |
| 6853   | synapsin I                                                                                          | SYN1    | Homo sapiens |
| 6854   | synapsin II                                                                                         | SYN2    | Homo sapiens |
| 10492  | synaptotagmin binding, cytoplasmic RNA interacting protein                                          | SYNCRIP | Homo sapiens |
| 9145   | synaptogyrin 1                                                                                      | SYNGR1  | Homo sapiens |
| 9143   | synaptogyrin 3                                                                                      | SYNGR3  | Homo sapiens |
| 8867   | synaptojanin 1                                                                                      | SYNJ1   | Homo sapiens |
| 8871   | synaptojanin 2                                                                                      | SYNJ2   | Homo sapiens |
| 6855   | synaptophysin                                                                                       | SYP     | Homo sapiens |
| 6857   | synaptotagmin I                                                                                     | SYT1    | Homo sapiens |
| 6861   | synaptotagmin V                                                                                     | SYT5    | Homo sapiens |

|       |                                                                                         |         |              |
|-------|-----------------------------------------------------------------------------------------|---------|--------------|
| 6862  | T, brachyury homolog (mouse)                                                            | T       | Homo sapiens |
| 6863  | tachykinin, precursor 1                                                                 | TAC1    | Homo sapiens |
| 6867  | transforming, acidic coiled-coil containing protein 1                                   | TACC1   | Homo sapiens |
| 6865  | tachykinin receptor 2                                                                   | TACR2   | Homo sapiens |
| 6872  | TAF1 RNA polymerase II, TATA box binding protein (TBP)-associated factor, 250kDa        | TAF1    | Homo sapiens |
| 6882  | TAF11 RNA polymerase II, TATA box binding protein (TBP)-associated factor, 28kDa        | TAF11   | Homo sapiens |
| 6883  | TAF12 RNA polymerase II, TATA box binding protein (TBP)-associated factor, 20kDa        | TAF12   | Homo sapiens |
| 8148  | TAF15 RNA polymerase II, TATA box binding protein (TBP)-associated factor, 68kDa        | TAF15   | Homo sapiens |
| 9015  | TATA box binding protein (TBP)-associated factor, RNA polymerase I, A, 48kDa            | TAF1A   | Homo sapiens |
| 9014  | TATA box binding protein (TBP)-associated factor, RNA polymerase I, B, 63kDa            | TAF1B   | Homo sapiens |
| 9013  | TATA box binding protein (TBP)-associated factor, RNA polymerase I, C, 110kDa           | TAF1C   | Homo sapiens |
| 6873  | TAF2 RNA polymerase II, TATA box binding protein (TBP)-associated factor, 150kDa        | TAF2    | Homo sapiens |
| 6877  | TAF5 RNA polymerase II, TATA box binding protein (TBP)-associated factor, 100kDa        | TAF5    | Homo sapiens |
| 27097 | TAF5-like RNA polymerase II, p300/CBP-associated factor (PCAF)-associated factor, 65kDa | TAF5L   | Homo sapiens |
| 6878  | TAF6 RNA polymerase II, TATA box binding protein (TBP)-associated factor, 80kDa         | TAF6    | Homo sapiens |
| 10629 | TAF6-like RNA polymerase II, p300/CBP-associated factor (PCAF)-associated factor, 65kDa | TAF6L   | Homo sapiens |
| 6880  | TAF9 RNA polymerase II, TATA box binding protein (TBP)-associated factor, 32kDa         | TAF9    | Homo sapiens |
| 6888  | transaldolase 1                                                                         | TALDO1  | Homo sapiens |
| 10010 | TRAF family member-associated NFKB activator                                            | TANK    | Homo sapiens |
| 6891  | transporter 2, ATP-binding cassette, sub-family B (MDR/TAP)                             | TAP2    | Homo sapiens |
| 6892  | TAP binding protein (tapasin)                                                           | TAPBP   | Homo sapiens |
| 6894  | TAR (HIV-1) RNA binding protein 1                                                       | TARBP1  | Homo sapiens |
| 6895  | TAR (HIV-1) RNA binding protein 2                                                       | TARBP2  | Homo sapiens |
| 23435 | TAR DNA binding protein                                                                 | TARDBP  | Homo sapiens |
| 6897  | threonyl-tRNA synthetase                                                                | TARS    | Homo sapiens |
| 8887  | Tax1 (human T-cell leukemia virus type I) binding protein 1                             | TAX1BP1 | Homo sapiens |
| 30851 | Tax1 (human T-cell leukemia virus type I) binding protein 3                             | TAX1BP3 | Homo sapiens |
| 6901  | tafazzin                                                                                | TAZ     | Homo sapiens |
| 23216 | TBC1 (tre-2/USP6, BUB2, cdc16) domain family, member 1                                  | TBC1D1  | Homo sapiens |
| 64786 | TBC1 domain family, member 15                                                           | TBC1D15 | Homo sapiens |
| 79735 | TBC1 domain family, member 17                                                           | TBC1D17 | Homo sapiens |
| 55357 | TBC1 domain family, member 2                                                            | TBC1D2  | Homo sapiens |
| 9779  | TBC1 domain family, member 5                                                            | TBC1D5  | Homo sapiens |
| 51256 | TBC1 domain family, member 7                                                            | TBC1D7  | Homo sapiens |
| 6902  | tubulin folding cofactor A                                                              | TBCA    | Homo sapiens |
| 6903  | tubulin folding cofactor C                                                              | TBCC    | Homo sapiens |

|           |                                                                                                  |         |              |
|-----------|--------------------------------------------------------------------------------------------------|---------|--------------|
| 6905      | tubulin folding cofactor E                                                                       | TBCE    | Homo sapiens |
| 6907      | transducin (beta)-like 1X-linked                                                                 | TBL1X   | Homo sapiens |
| 26608     | transducin (beta)-like 2                                                                         | TBL2    | Homo sapiens |
| 6908      | TATA box binding protein                                                                         | TBP     | Homo sapiens |
| 9519      | TBP-like 1                                                                                       | TBPL1   | Homo sapiens |
| 9095      | T-box 19                                                                                         | TBX19   | Homo sapiens |
| 6909      | T-box 2                                                                                          | TBX2    | Homo sapiens |
| 30009     | T-box 21                                                                                         | TBX21   | Homo sapiens |
| 6926      | T-box 3                                                                                          | TBX3    | Homo sapiens |
| 6915      | thromboxane A2 receptor                                                                          | TBXA2R  | Homo sapiens |
| 6916      | thromboxane A synthase 1 (platelet)                                                              | TBXAS1  | Homo sapiens |
| 6919      | transcription elongation factor A (SII), 2                                                       | TCEA2   | Homo sapiens |
| 100132973 | similar to elongin C; transcription elongation factor B (SIII), polypeptide 1 (15kDa, elongin C) | TCEB1   | Homo sapiens |
| 6921      | similar to elongin C; transcription elongation factor B (SIII), polypeptide 1 (15kDa, elongin C) | TCEB1   | Homo sapiens |
| 6923      | transcription elongation factor B (SIII), polypeptide 2 (18kDa, elongin B)                       | TCEB2   | Homo sapiens |
| 6924      | transcription elongation factor B (SIII), polypeptide 3 (110kDa, elongin A)                      | TCEB3   | Homo sapiens |
| 10915     | transcription elongation regulator 1                                                             | TCERG1  | Homo sapiens |
| 6938      | transcription factor 12                                                                          | TCF12   | Homo sapiens |
| 6942      | transcription factor 20 (AR1)                                                                    | TCF20   | Homo sapiens |
| 6925      | transcription factor 4                                                                           | TCF4    | Homo sapiens |
| 6932      | transcription factor 7 (T-cell specific, HMG-box)                                                | TCF7    | Homo sapiens |
| 83439     | transcription factor 7-like 1 (T-cell specific, HMG-box)                                         | TCF7L1  | Homo sapiens |
| 6934      | transcription factor 7-like 2 (T-cell specific, HMG-box)                                         | TCF7L2  | Homo sapiens |
| 10312     | T-cell, immune regulator 1, ATPase, H+ transporting, lysosomal V0 subunit A3                     | TCIRG1  | Homo sapiens |
| 6947      | transcobalamin I (vitamin B12 binding protein, R binder family)                                  | TCN1    | Homo sapiens |
| 6948      | transcobalamin II; macrocytic anemia                                                             | TCN2    | Homo sapiens |
| 6949      | Treacher Collins-Franceschetti syndrome 1                                                        | TCOF1   | Homo sapiens |
| 6999      | tryptophan 2,3-dioxygenase                                                                       | TDO2    | Homo sapiens |
| 23424     | tudor domain containing 7                                                                        | TDRD7   | Homo sapiens |
| 7003      | TEA domain family member 1 (SV40 transcriptional enhancer factor)                                | TEAD1   | Homo sapiens |
| 8463      | TEA domain family member 2                                                                       | TEAD2   | Homo sapiens |
| 7004      | TEA domain family member 4                                                                       | TEAD4   | Homo sapiens |
| 7007      | tectorin alpha                                                                                   | TECTA   | Homo sapiens |
| 7010      | TEK tyrosine kinase, endothelial                                                                 | TEK     | Homo sapiens |
| 27285     | tektin 2 (testicular)                                                                            | TEKT2   | Homo sapiens |
| 23371     | tensin like C1 domain containing phosphatase (tensin 2)                                          | TENC1   | Homo sapiens |
| 7014      | telomeric repeat binding factor 2                                                                | TERF2   | Homo sapiens |
| 54386     | telomeric repeat binding factor 2, interacting protein                                           | TERF2IP | Homo sapiens |
| 7015      | telomerase reverse transcriptase                                                                 | TERT    | Homo sapiens |
| 7016      | testis-specific kinase 1                                                                         | TESK1   | Homo sapiens |
| 10420     | testis-specific kinase 2                                                                         | TESK2   | Homo sapiens |
| 56159     | testis expressed 11                                                                              | TEX11   | Homo sapiens |

|        |                                                                                                   |          |              |
|--------|---------------------------------------------------------------------------------------------------|----------|--------------|
| 113419 | testis expressed 261                                                                              | TEX261   | Homo sapiens |
| 7018   | transferrin                                                                                       | TF       | Homo sapiens |
| 7019   | transcription factor A, mitochondrial                                                             | TFAM     | Homo sapiens |
| 7020   | transcription factor AP-2 alpha (activating enhancer binding protein 2 alpha)                     | TFAP2A   | Homo sapiens |
| 7021   | transcription factor AP-2 beta (activating enhancer binding protein 2 beta)                       | TFAP2B   | Homo sapiens |
| 7023   | transcription factor AP-4 (activating enhancer binding protein 4)                                 | TFAP4    | Homo sapiens |
| 64216  | transcription factor B2, mitochondrial                                                            | TFB2M    | Homo sapiens |
| 7024   | transcription factor CP2                                                                          | TFCP2    | Homo sapiens |
| 29842  | transcription factor CP2-like 1                                                                   | TFCP2L1  | Homo sapiens |
| 7027   | transcription factor Dp-1                                                                         | TFDP1    | Homo sapiens |
| 7030   | transcription factor binding to IGHM enhancer 3                                                   | TFE3     | Homo sapiens |
| 24144  | tuftelin interacting protein 11                                                                   | TFIP11   | Homo sapiens |
| 7035   | tissue factor pathway inhibitor (lipoprotein-associated coagulation inhibitor)                    | TFPI     | Homo sapiens |
| 7980   | tissue factor pathway inhibitor 2                                                                 | TFPI2    | Homo sapiens |
| 7038   | thyroglobulin                                                                                     | TG       | Homo sapiens |
| 23483  | TDP-glucose 4,6-dehydratase                                                                       | TGDS     | Homo sapiens |
| 7039   | transforming growth factor, alpha                                                                 | TGFA     | Homo sapiens |
| 7041   | transforming growth factor beta 1 induced transcript 1                                            | TGFB1I1  | Homo sapiens |
| 7042   | transforming growth factor, beta 2                                                                | TGFB2    | Homo sapiens |
| 7043   | transforming growth factor, beta 3                                                                | TGFB3    | Homo sapiens |
| 7045   | transforming growth factor, beta-induced, 68kDa                                                   | TGFBI    | Homo sapiens |
| 7046   | transforming growth factor, beta receptor 1                                                       | TGFBR1   | Homo sapiens |
| 7048   | transforming growth factor, beta receptor II (70/80kDa)                                           | TGFBR2   | Homo sapiens |
| 7049   | transforming growth factor, beta receptor III                                                     | TGFBR3   | Homo sapiens |
| 9392   | transforming growth factor, beta receptor associated protein 1                                    | TGFBRAP1 | Homo sapiens |
| 60436  | TGFB-induced factor homeobox 2                                                                    | TGIF2    | Homo sapiens |
| 7051   | transglutaminase 1 (K polypeptide epidermal type I, protein-glutamine-gamma-glutamyltransferase)  | TGM1     | Homo sapiens |
| 7052   | transglutaminase 2 (C polypeptide, protein-glutamine-gamma-glutamyltransferase)                   | TGM2     | Homo sapiens |
| 7053   | transglutaminase 3 (E polypeptide, protein-glutamine-gamma-glutamyltransferase)                   | TGM3     | Homo sapiens |
| 7047   | transglutaminase 4 (prostate)                                                                     | TGM4     | Homo sapiens |
| 10618  | trans-golgi network protein 2                                                                     | TGOLN2   | Homo sapiens |
| 7054   | tyrosine hydroxylase                                                                              | TH       | Homo sapiens |
| 57215  | THAP domain containing 11                                                                         | THAP11   | Homo sapiens |
| 7057   | thrombospondin 1                                                                                  | THBS1    | Homo sapiens |
| 7059   | thrombospondin 3                                                                                  | THBS3    | Homo sapiens |
| 7060   | thrombospondin 4                                                                                  | THBS4    | Homo sapiens |
| 9984   | THO complex 1                                                                                     | THOC1    | Homo sapiens |
| 57187  | THO complex 2                                                                                     | THOC2    | Homo sapiens |
| 7064   | thimet oligopeptidase 1                                                                           | THOP1    | Homo sapiens |
| 7066   | thrombopoietin                                                                                    | THPO     | Homo sapiens |
| 7067   | thyroid hormone receptor, alpha (erythroblastic leukemia viral (v-erb-a) oncogene homolog, avian) | THRA     | Homo sapiens |

|        |                                                                                                                                               |          |              |
|--------|-----------------------------------------------------------------------------------------------------------------------------------------------|----------|--------------|
| 7068   | thyroid hormone receptor, beta (erythroblastic leukemia viral (v-erb-a) oncogene homolog 2, avian)                                            | THR8     | Homo sapiens |
| 7069   | thyroid hormone responsive (SPOT14 homolog, rat)                                                                                              | THRSP    | Homo sapiens |
| 7070   | Thy-1 cell surface antigen                                                                                                                    | THY1     | Homo sapiens |
| 7072   | TIA1 cytotoxic granule-associated RNA binding protein                                                                                         | TIA1     | Homo sapiens |
| 7073   | TIA1 cytotoxic granule-associated RNA binding protein-like 1                                                                                  | TIAL1    | Homo sapiens |
| 7074   | T-cell lymphoma invasion and metastasis 1                                                                                                     | TIAM1    | Homo sapiens |
| 8914   | timeless homolog (Drosophila)                                                                                                                 | TIMELESS | Homo sapiens |
| 10440  | translocase of inner mitochondrial membrane 17 homolog A (yeast)                                                                              | TIMM17A  | Homo sapiens |
| 10245  | translocase of inner mitochondrial membrane 17 homolog B (yeast)                                                                              | TIMM17B  | Homo sapiens |
| 10469  | translocase of inner mitochondrial membrane 44 homolog (yeast)                                                                                | TIMM44   | Homo sapiens |
| 7076   | TIMP metalloproteinase inhibitor 1                                                                                                            | TIMP1    | Homo sapiens |
| 7077   | TIMP metalloproteinase inhibitor 2                                                                                                            | TIMP2    | Homo sapiens |
| 7078   | TIMP metalloproteinase inhibitor 3                                                                                                            | TIMP3    | Homo sapiens |
| 7082   | tight junction protein 1 (zona occludens 1)                                                                                                   | TJP1     | Homo sapiens |
| 9414   | tight junction protein 2 (zona occludens 2)                                                                                                   | TJP2     | Homo sapiens |
| 7084   | thymidine kinase 2, mitochondrial                                                                                                             | TK2      | Homo sapiens |
| 7086   | transketolase                                                                                                                                 | TKT      | Homo sapiens |
| 8277   | transketolase-like 1                                                                                                                          | TKTL1    | Homo sapiens |
| 7088   | similar to transducin-like enhancer of split 1 (E(sp1) homolog, Drosophila); transducin-like enhancer of split 1 (E(sp1) homolog, Drosophila) | TLE1     | Homo sapiens |
| 645381 | similar to transducin-like enhancer of split 1 (E(sp1) homolog, Drosophila); transducin-like enhancer of split 1 (E(sp1) homolog, Drosophila) | TLE1     | Homo sapiens |
| 7090   | transducin-like enhancer of split 3 (E(sp1) homolog, Drosophila)                                                                              | TLE3     | Homo sapiens |
| 7091   | transducin-like enhancer of split 4 (E(sp1) homolog, Drosophila)                                                                              | TLE4     | Homo sapiens |
| 9874   | tousled-like kinase 1                                                                                                                         | TLK1     | Homo sapiens |
| 11011  | tousled-like kinase 2                                                                                                                         | TLK2     | Homo sapiens |
| 7093   | tolloid-like 2                                                                                                                                | TLL2     | Homo sapiens |
| 83660  | talin 2                                                                                                                                       | TLN2     | Homo sapiens |
| 7097   | toll-like receptor 2                                                                                                                          | TLR2     | Homo sapiens |
| 7098   | toll-like receptor 3                                                                                                                          | TLR3     | Homo sapiens |
| 7099   | toll-like receptor 4                                                                                                                          | TLR4     | Homo sapiens |
| 51284  | toll-like receptor 7                                                                                                                          | TLR7     | Homo sapiens |
| 51311  | toll-like receptor 8                                                                                                                          | TLR8     | Homo sapiens |
| 4071   | transmembrane 4 L six family member 1                                                                                                         | TM4SF1   | Homo sapiens |
| 7104   | transmembrane 4 L six family member 4                                                                                                         | TM4SF4   | Homo sapiens |
| 9032   | transmembrane 4 L six family member 5                                                                                                         | TM4SF5   | Homo sapiens |
| 7108   | transmembrane 7 superfamily member 2                                                                                                          | TM7SF2   | Homo sapiens |
| 10548  | transmembrane 9 superfamily member 1                                                                                                          | TM9SF1   | Homo sapiens |
| 9375   | transmembrane 9 superfamily member 2                                                                                                          | TM9SF2   | Homo sapiens |
| 3371   | tenascin C                                                                                                                                    | TNC      | Homo sapiens |
| 7124   | tumor necrosis factor (TNF superfamily, member 2)                                                                                             | TNF      | Homo sapiens |
| 7126   | tumor necrosis factor, alpha-induced protein 1 (endothelial)                                                                                  | TNFAIP1  | Homo sapiens |
| 7127   | tumor necrosis factor, alpha-induced protein 2                                                                                                | TNFAIP2  | Homo sapiens |
| 7128   | tumor necrosis factor, alpha-induced protein 3                                                                                                | TNFAIP3  | Homo sapiens |



|        |                                                                                                                                                      |           |              |
|--------|------------------------------------------------------------------------------------------------------------------------------------------------------|-----------|--------------|
| 7130   | tumor necrosis factor, alpha-induced protein 6                                                                                                       | TNFAIP6   | Homo sapiens |
| 8797   | tumor necrosis factor receptor superfamily, member 10a                                                                                               | TNFRSF10A | Homo sapiens |
| 8795   | tumor necrosis factor receptor superfamily, member 10b                                                                                               | TNFRSF10B | Homo sapiens |
| 8793   | tumor necrosis factor receptor superfamily, member 10d, decoy with truncated death domain                                                            | TNFRSF10D | Homo sapiens |
| 4982   | tumor necrosis factor receptor superfamily, member 11b                                                                                               | TNFRSF11B | Homo sapiens |
| 51330  | tumor necrosis factor receptor superfamily, member 12A                                                                                               | TNFRSF12A | Homo sapiens |
| 8764   | tumor necrosis factor receptor superfamily, member 14 (herpesvirus entry mediator)                                                                   | TNFRSF14  | Homo sapiens |
| 608    | tumor necrosis factor receptor superfamily, member 17                                                                                                | TNFRSF17  | Homo sapiens |
| 7133   | tumor necrosis factor receptor superfamily, member 1B                                                                                                | TNFRSF1B  | Homo sapiens |
| 27242  | tumor necrosis factor receptor superfamily, member 21                                                                                                | TNFRSF21  | Homo sapiens |
| 8718   | tumor necrosis factor receptor superfamily, member 25                                                                                                | TNFRSF25  | Homo sapiens |
| 8771   | tumor necrosis factor receptor superfamily, member 6b, decoy; regulator of telomere elongation helicase 1                                            | TNFRSF6B  | Homo sapiens |
| 51750  | tumor necrosis factor receptor superfamily, member 6b, decoy; regulator of telomere elongation helicase 1                                            | TNFRSF6B  | Homo sapiens |
| 943    | tumor necrosis factor receptor superfamily, member 8                                                                                                 | TNFRSF8   | Homo sapiens |
| 8743   | tumor necrosis factor (ligand) superfamily, member 10                                                                                                | TNFSF10   | Homo sapiens |
| 8600   | tumor necrosis factor (ligand) superfamily, member 11                                                                                                | TNFSF11   | Homo sapiens |
| 8741   | TNFSF12-TNFSF13 readthrough transcript; tumor necrosis factor (ligand) superfamily, member 12; tumor necrosis factor (ligand) superfamily, member 13 | TNFSF12   | Homo sapiens |
| 407977 | TNFSF12-TNFSF13 readthrough transcript; tumor necrosis factor (ligand) superfamily, member 12; tumor necrosis factor (ligand) superfamily, member 13 | TNFSF12   | Homo sapiens |
| 8742   | TNFSF12-TNFSF13 readthrough transcript; tumor necrosis factor (ligand) superfamily, member 12; tumor necrosis factor (ligand) superfamily, member 13 | TNFSF12   | Homo sapiens |
| 10673  | tumor necrosis factor (ligand) superfamily, member 13b                                                                                               | TNFSF13B  | Homo sapiens |
| 7292   | tumor necrosis factor (ligand) superfamily, member 4                                                                                                 | TNFSF4    | Homo sapiens |
| 10318  | TNFAIP3 interacting protein 1                                                                                                                        | TNIP1     | Homo sapiens |
| 8658   | tankyrase, TRF1-interacting ankyrin-related ADP-ribose polymerase                                                                                    | TNKS      | Homo sapiens |
| 7134   | troponin C type 1 (slow)                                                                                                                             | TNNC1     | Homo sapiens |
| 7135   | troponin I type 1 (skeletal, slow)                                                                                                                   | TNNI1     | Homo sapiens |
| 7136   | troponin I type 2 (skeletal, fast)                                                                                                                   | TNNI2     | Homo sapiens |
| 51086  | TNNI3 interacting kinase; fucose-1-phosphate guanylyltransferase                                                                                     | TNNI3K    | Homo sapiens |
| 8790   | TNNI3 interacting kinase; fucose-1-phosphate guanylyltransferase                                                                                     | TNNI3K    | Homo sapiens |
| 7139   | troponin T type 2 (cardiac)                                                                                                                          | TNNT2     | Homo sapiens |
| 7140   | troponin T type 3 (skeletal, fast)                                                                                                                   | TNNT3     | Homo sapiens |
| 7141   | transition protein 1 (during histone to protamine replacement)                                                                                       | TNP1      | Homo sapiens |
| 3842   | transportin 1                                                                                                                                        | TNPO1     | Homo sapiens |
| 30000  | transportin 2                                                                                                                                        | TNPO2     | Homo sapiens |
| 7146   | tenascin XB; tenascin XA pseudogene                                                                                                                  | TNXB      | Homo sapiens |
| 7148   | tenascin XB; tenascin XA pseudogene                                                                                                                  | TNXB      | Homo sapiens |
| 10140  | transducer of ERBB2, 1                                                                                                                               | TOB1      | Homo sapiens |
| 10766  | transducer of ERBB2, 2                                                                                                                               | TOB2      | Homo sapiens |
| 10040  | target of myb1 (chicken)-like 1                                                                                                                      | TOM1L1    | Homo sapiens |

|        |                                                                          |          |              |
|--------|--------------------------------------------------------------------------|----------|--------------|
| 10452  | translocase of outer mitochondrial membrane 40 homolog (yeast)           | TOMM40   | Homo sapiens |
| 54543  | translocase of outer mitochondrial membrane 7 homolog (yeast)            | TOMM7    | Homo sapiens |
| 9868   | translocase of outer mitochondrial membrane 70 homolog A (S. cerevisiae) | TOMM70A  | Homo sapiens |
| 7150   | topoisomerase (DNA) I                                                    | TOP1     | Homo sapiens |
| 7153   | topoisomerase (DNA) II alpha 170kDa                                      | TOP2A    | Homo sapiens |
| 7156   | topoisomerase (DNA) III alpha                                            | TOP3A    | Homo sapiens |
| 8940   | topoisomerase (DNA) III beta                                             | TOP3B    | Homo sapiens |
| 11073  | topoisomerase (DNA) II binding protein 1                                 | TOPBP1   | Homo sapiens |
| 10210  | topoisomerase I binding, arginine/serine-rich                            | TOPORS   | Homo sapiens |
| 27348  | torsin family 1, member B (torsin B)                                     | TOR1B    | Homo sapiens |
| 7157   | tumor protein p53                                                        | TP53     | Homo sapiens |
| 7158   | tumor protein p53 binding protein 1                                      | TP53BP1  | Homo sapiens |
| 7159   | tumor protein p53 binding protein, 2                                     | TP53BP2  | Homo sapiens |
| 9537   | tumor protein p53 inducible protein 11                                   | TP53I11  | Homo sapiens |
| 9540   | tumor protein p53 inducible protein 3                                    | TP53I3   | Homo sapiens |
| 94241  | tumor protein p53 inducible nuclear protein 1                            | TP53INP1 | Homo sapiens |
| 112858 | TP53 regulating kinase                                                   | TP53RK   | Homo sapiens |
| 7162   | trophoblast glycoprotein                                                 | TPBG     | Homo sapiens |
| 7165   | tumor protein D52-like 2                                                 | TPD52L2  | Homo sapiens |
| 7167   | TPI1 pseudogene; triosephosphate isomerase 1                             | TPI1     | Homo sapiens |
| 729708 | TPI1 pseudogene; triosephosphate isomerase 1                             | TPI1     | Homo sapiens |
| 7168   | tropomyosin 1 (alpha)                                                    | TPM1     | Homo sapiens |
| 7169   | tropomyosin 2 (beta)                                                     | TPM2     | Homo sapiens |
| 7170   | tropomyosin 3                                                            | TPM3     | Homo sapiens |
| 7174   | tripeptidyl peptidase II                                                 | TPP2     | Homo sapiens |
| 7175   | translocated promoter region (to activated MET oncogene)                 | TPR      | Homo sapiens |
| 8460   | tyrosylprotein sulfotransferase 1                                        | TPST1    | Homo sapiens |
| 8459   | tyrosylprotein sulfotransferase 2                                        | TPST2    | Homo sapiens |
| 22974  | TPX2, microtubule-associated, homolog (Xenopus laevis)                   | TPX2     | Homo sapiens |
| 8717   | TNFRSF1A-associated via death domain                                     | TRADD    | Homo sapiens |
| 7185   | TNF receptor-associated factor 1                                         | TRAF1    | Homo sapiens |
| 9618   | TNF receptor-associated factor 4                                         | TRAF4    | Homo sapiens |
| 7188   | TNF receptor-associated factor 5                                         | TRAF5    | Homo sapiens |
| 7189   | TNF receptor-associated factor 6                                         | TRAF6    | Homo sapiens |
| 23471  | translocation associated membrane protein 1                              | TRAM1    | Homo sapiens |
| 10131  | TNF receptor-associated protein 1                                        | TRAP1    | Homo sapiens |
| 27095  | trafficking protein particle complex 3                                   | TRAPPC3  | Homo sapiens |
| 11181  | trehalase (brush-border membrane glycoprotein)                           | TREH     | Homo sapiens |
| 10221  | tribbles homolog 1 (Drosophila)                                          | TRIB1    | Homo sapiens |
| 57761  | tribbles homolog 3 (Drosophila)                                          | TRIB3    | Homo sapiens |
| 10107  | tripartite motif-containing 10                                           | TRIM10   | Homo sapiens |
| 10626  | tripartite motif-containing 16                                           | TRIM16   | Homo sapiens |
| 10155  | tripartite motif-containing 28                                           | TRIM28   | Homo sapiens |
| 23650  | tripartite motif-containing 29                                           | TRIM29   | Homo sapiens |
| 10612  | tripartite motif-containing 3                                            | TRIM3    | Homo sapiens |

|        |                                                                                                   |         |              |
|--------|---------------------------------------------------------------------------------------------------|---------|--------------|
| 11074  | tripartite motif-containing 31                                                                    | TRIM31  | Homo sapiens |
| 22954  | tripartite motif-containing 32                                                                    | TRIM32  | Homo sapiens |
| 51592  | tripartite motif-containing 33                                                                    | TRIM33  | Homo sapiens |
| 23087  | tripartite motif-containing 35                                                                    | TRIM35  | Homo sapiens |
| 4591   | tripartite motif-containing 37                                                                    | TRIM37  | Homo sapiens |
| 54765  | tripartite motif-containing 44                                                                    | TRIM44  | Homo sapiens |
| 7204   | triple functional domain (PTPRF interacting)                                                      | TRIO    | Homo sapiens |
| 9322   | thyroid hormone receptor interactor 10                                                            | TRIP10  | Homo sapiens |
| 341378 | hypothetical LOC341378; thyroid hormone receptor interactor 11                                    | TRIP11  | Homo sapiens |
| 9321   | hypothetical LOC341378; thyroid hormone receptor interactor 11                                    | TRIP11  | Homo sapiens |
| 9320   | thyroid hormone receptor interactor 12                                                            | TRIP12  | Homo sapiens |
| 9319   | thyroid hormone receptor interactor 13                                                            | TRIP13  | Homo sapiens |
| 9325   | thyroid hormone receptor interactor 4                                                             | TRIP4   | Homo sapiens |
| 7205   | thyroid hormone receptor interactor 6                                                             | TRIP6   | Homo sapiens |
| 55621  | TRM1 tRNA methyltransferase 1 homolog ( <i>S. cerevisiae</i> )                                    | TRMT1   | Homo sapiens |
| 10024  | trophinin associated protein (tastin)                                                             | TROAP   | Homo sapiens |
| 8989   | transient receptor potential cation channel, subfamily A, member 1                                | TRPA1   | Homo sapiens |
| 7222   | transient receptor potential cation channel, subfamily C, member 3                                | TRPC3   | Homo sapiens |
| 26133  | transient receptor potential cation channel, subfamily C, member 4 associated protein             | TRPC4AP | Homo sapiens |
| 7225   | transient receptor potential cation channel, subfamily C, member 6                                | TRPC6   | Homo sapiens |
| 4308   | transient receptor potential cation channel, subfamily M, member 1                                | TRPM1   | Homo sapiens |
| 7227   | trichorhinophalangeal syndrome I                                                                  | TRPS1   | Homo sapiens |
| 55503  | transient receptor potential cation channel, subfamily V, member 6                                | TRPV6   | Homo sapiens |
| 8295   | transformation/transcription domain-associated protein                                            | TRRAP   | Homo sapiens |
| 7248   | tuberous sclerosis 1                                                                              | TSC1    | Homo sapiens |
| 7249   | tuberous sclerosis 2                                                                              | TSC2    | Homo sapiens |
| 10102  | Ts translation elongation factor, mitochondrial                                                   | TSEFM   | Homo sapiens |
| 7251   | tumor susceptibility gene 101                                                                     | TSG101  | Homo sapiens |
| 7247   | translin                                                                                          | TSN     | Homo sapiens |
| 7263   | thiosulfate sulfurtransferase (rhodanese)                                                         | TST     | Homo sapiens |
| 7264   | tissue specific transplantation antigen P35B                                                      | TSTA3   | Homo sapiens |
| 7265   | tetratricopeptide repeat domain 1                                                                 | TTC1    | Homo sapiens |
| 51112  | tetratricopeptide repeat domain 15                                                                | TTC15   | Homo sapiens |
| 7267   | tetratricopeptide repeat domain 3; tetratricopeptide repeat domain 3-like                         | TTC3    | Homo sapiens |
| 286495 | tetratricopeptide repeat domain 3; tetratricopeptide repeat domain 3-like                         | TTC3    | Homo sapiens |
| 8458   | transcription termination factor, RNA polymerase II                                               | TTF2    | Homo sapiens |
| 7272   | TTK protein kinase                                                                                | TTK     | Homo sapiens |
| 25809  | tubulin tyrosine ligase-like family, member 1                                                     | TLL1    | Homo sapiens |
| 7273   | titin                                                                                             | TTN     | Homo sapiens |
| 7276   | transthyretin                                                                                     | TTR     | Homo sapiens |
| 51567  | TRAF and TNF receptor associated protein                                                          | TTRAP   | Homo sapiens |
| 442308 | tubulin, beta; similar to tubulin, beta 5; tubulin, beta pseudogene 2; tubulin, beta pseudogene 1 | TUBB    | Homo sapiens |
| 203068 | tubulin, beta; similar to tubulin, beta 5; tubulin, beta pseudogene 2;                            | TUBB    | Homo sapiens |

|           |                                                                                                        |         |              |
|-----------|--------------------------------------------------------------------------------------------------------|---------|--------------|
|           | tubulin, beta pseudogene 1                                                                             |         |              |
| 92755     | tubulin, beta; similar to tubulin, beta 5; tubulin, beta pseudogene 2; tubulin, beta pseudogene 1      | TUBB    | Homo sapiens |
| 647000    | tubulin, beta; similar to tubulin, beta 5; tubulin, beta pseudogene 2; tubulin, beta pseudogene 1      | TUBB    | Homo sapiens |
| 10844     | tubulin, gamma complex associated protein 2                                                            | TUBGCP2 | Homo sapiens |
| 10426     | tubulin, gamma complex associated protein 3                                                            | TUBGCP3 | Homo sapiens |
| 7287      | tubby like protein 1                                                                                   | TULP1   | Homo sapiens |
| 11334     | tumor suppressor candidate 2                                                                           | TUSC2   | Homo sapiens |
| 7291      | twist homolog 1 (Drosophila)                                                                           | TWIST1  | Homo sapiens |
| 7294      | TXK tyrosine kinase                                                                                    | TXK     | Homo sapiens |
| 7295      | thioredoxin                                                                                            | TXN     | Homo sapiens |
| 25828     | thioredoxin 2                                                                                          | TXN2    | Homo sapiens |
| 10190     | thioredoxin domain containing 9                                                                        | TXNDC9  | Homo sapiens |
| 9352      | thioredoxin-like 1                                                                                     | TXNL1   | Homo sapiens |
| 10907     | thioredoxin-like 4A                                                                                    | TXNL4A  | Homo sapiens |
| 54957     | thioredoxin-like 4B                                                                                    | TXNL4B  | Homo sapiens |
| 100130902 | thioredoxin reductase 1; hypothetical LOC100130902                                                     | TXNRD1  | Homo sapiens |
| 7296      | thioredoxin reductase 1; hypothetical LOC100130902                                                     | TXNRD1  | Homo sapiens |
| 7298      | thymidylate synthetase                                                                                 | TYMS    | Homo sapiens |
| 7306      | tyrosinase-related protein 1                                                                           | TYRP1   | Homo sapiens |
| 7307      | U2 small nuclear RNA auxiliary factor 1                                                                | U2AF1   | Homo sapiens |
| 11338     | U2 small nuclear RNA auxiliary factor 2                                                                | U2AF2   | Homo sapiens |
| 55075     | uveal autoantigen with coiled-coil domains and ankyrin repeats                                         | UACA    | Homo sapiens |
| 10537     | ubiquitin D                                                                                            | UBD     | Homo sapiens |
| 7319      | ubiquitin-conjugating enzyme E2A (RAD6 homolog)                                                        | UBE2A   | Homo sapiens |
| 7320      | ubiquitin-conjugating enzyme E2B (RAD6 homolog)                                                        | UBE2B   | Homo sapiens |
| 11065     | ubiquitin-conjugating enzyme E2C                                                                       | UBE2C   | Homo sapiens |
| 7321      | ubiquitin-conjugating enzyme E2D 1 (UBC4/5 homolog, yeast)                                             | UBE2D1  | Homo sapiens |
| 7322      | ubiquitin-conjugating enzyme E2D 2 (UBC4/5 homolog, yeast)                                             | UBE2D2  | Homo sapiens |
| 10477     | ubiquitin-conjugating enzyme E2E 3 (UBC4/5 homolog, yeast)                                             | UBE2E3  | Homo sapiens |
| 7327      | ubiquitin-conjugating enzyme E2G 2 (UBC7 homolog, yeast)                                               | UBE2G2  | Homo sapiens |
| 7328      | ubiquitin-conjugating enzyme E2H (UBC8 homolog, yeast)                                                 | UBE2H   | Homo sapiens |
| 51465     | ubiquitin-conjugating enzyme E2, J1 (UBC6 homolog, yeast)                                              | UBE2J1  | Homo sapiens |
| 7332      | ubiquitin-conjugating enzyme E2L 3                                                                     | UBE2L3  | Homo sapiens |
| 9246      | ubiquitin-conjugating enzyme E2L 6                                                                     | UBE2L6  | Homo sapiens |
| 606551    | ubiquitin-conjugating enzyme E2M (UBC12 homolog, yeast); ubiquitin-conjugating enzyme E2M pseudogene 1 | UBE2M   | Homo sapiens |
| 9040      | ubiquitin-conjugating enzyme E2M (UBC12 homolog, yeast); ubiquitin-conjugating enzyme E2M pseudogene 1 | UBE2M   | Homo sapiens |
| 27338     | ubiquitin-conjugating enzyme E2S                                                                       | UBE2S   | Homo sapiens |
| 7336      | ubiquitin-conjugating enzyme E2 variant 2                                                              | UBE2V2  | Homo sapiens |
| 89910     | ubiquitin protein ligase E3B                                                                           | UBE3B   | Homo sapiens |
| 10277     | ubiquitination factor E4B (UFD2 homolog, yeast)                                                        | UBE4B   | Homo sapiens |
| 5412      | ubiquitin-like 3                                                                                       | UBL3    | Homo sapiens |
| 29855     | ubinnuclein 1                                                                                          | UBN1    | Homo sapiens |
| 29978     | ubiquilin 2                                                                                            | UBQLN2  | Homo sapiens |

|           |                                                                                                                                                                                  |         |              |
|-----------|----------------------------------------------------------------------------------------------------------------------------------------------------------------------------------|---------|--------------|
| 7345      | ubiquitin carboxyl-terminal esterase L1 (ubiquitin thiolesterase)                                                                                                                | UCHL1   | Homo sapiens |
| 7347      | ubiquitin carboxyl-terminal esterase L3 (ubiquitin thiolesterase)                                                                                                                | UCHL3   | Homo sapiens |
| 7349      | urocortin                                                                                                                                                                        | UCN     | Homo sapiens |
| 114131    | urocortin 3 (stresscopin)                                                                                                                                                        | UCN3    | Homo sapiens |
| 7351      | uncoupling protein 2 (mitochondrial, proton carrier)                                                                                                                             | UCP2    | Homo sapiens |
| 7353      | ubiquitin fusion degradation 1 like (yeast)                                                                                                                                      | UFD1L   | Homo sapiens |
| 7357      | UDP-glucose ceramide glucosyltransferase                                                                                                                                         | UGCG    | Homo sapiens |
| 7363      | UDP glucuronosyltransferase 2 family, polypeptide B4                                                                                                                             | UGT2B4  | Homo sapiens |
| 7368      | UDP glycosyltransferase 8                                                                                                                                                        | UGT8    | Homo sapiens |
| 8408      | unc-51-like kinase 1 (C. elegans)                                                                                                                                                | ULK1    | Homo sapiens |
| 9706      | unc-51-like kinase 2 (C. elegans)                                                                                                                                                | ULK2    | Homo sapiens |
| 7369      | uromodulin                                                                                                                                                                       | UMOD    | Homo sapiens |
| 7372      | uridine monophosphate synthetase                                                                                                                                                 | UMPS    | Homo sapiens |
| 9094      | unc-119 homolog (C. elegans)                                                                                                                                                     | UNC119  | Homo sapiens |
| 8633      | unc-5 homolog C (C. elegans)                                                                                                                                                     | UNC5C   | Homo sapiens |
| 7374      | uracil-DNA glycosylase                                                                                                                                                           | UNG     | Homo sapiens |
| 26019     | UPF2 regulator of nonsense transcripts homolog (yeast)                                                                                                                           | UPF2    | Homo sapiens |
| 65109     | UPF3 regulator of nonsense transcripts homolog B (yeast)                                                                                                                         | UPF3B   | Homo sapiens |
| 11045     | uroplakin 1A                                                                                                                                                                     | UPK1A   | Homo sapiens |
| 7378      | uridine phosphorylase 1                                                                                                                                                          | UPP1    | Homo sapiens |
| 7381      | similar to ubiquinol-cytochrome c reductase binding protein;<br>ubiquinol-cytochrome c reductase binding protein pseudogene;<br>ubiquinol-cytochrome c reductase binding protein | UQCRB   | Homo sapiens |
| 727947    | similar to ubiquinol-cytochrome c reductase binding protein;<br>ubiquinol-cytochrome c reductase binding protein pseudogene;<br>ubiquinol-cytochrome c reductase binding protein | UQCRB   | Homo sapiens |
| 442454    | similar to ubiquinol-cytochrome c reductase binding protein;<br>ubiquinol-cytochrome c reductase binding protein pseudogene;<br>ubiquinol-cytochrome c reductase binding protein | UQCRB   | Homo sapiens |
| 7384      | ubiquinol-cytochrome c reductase core protein I                                                                                                                                  | UQCRC1  | Homo sapiens |
| 7385      | ubiquinol-cytochrome c reductase core protein II                                                                                                                                 | UQCRC2  | Homo sapiens |
| 100128525 | ubiquinol-cytochrome c reductase, Rieske iron-sulfur polypeptide-like 1; ubiquinol-cytochrome c reductase, Rieske iron-sulfur polypeptide 1                                      | UQCRFS1 | Homo sapiens |
| 7386      | ubiquinol-cytochrome c reductase, Rieske iron-sulfur polypeptide-like 1; ubiquinol-cytochrome c reductase, Rieske iron-sulfur polypeptide 1                                      | UQCRFS1 | Homo sapiens |
| 7389      | uroporphyrinogen decarboxylase                                                                                                                                                   | UROD    | Homo sapiens |
| 7390      | uroporphyrinogen III synthase                                                                                                                                                    | UROS    | Homo sapiens |
| 7392      | upstream transcription factor 2, c-fos interacting                                                                                                                               | USF2    | Homo sapiens |
| 7398      | ubiquitin specific peptidase 1                                                                                                                                                   | USP1    | Homo sapiens |
| 9100      | ubiquitin specific peptidase 10                                                                                                                                                  | USP10   | Homo sapiens |
| 8975      | ubiquitin specific peptidase 13 (isopeptidase T-3)                                                                                                                               | USP13   | Homo sapiens |
| 9097      | ubiquitin specific peptidase 14 (tRNA-guanine transglycosylase)                                                                                                                  | USP14   | Homo sapiens |
| 9958      | ubiquitin specific peptidase 15                                                                                                                                                  | USP15   | Homo sapiens |
| 10869     | ubiquitin specific peptidase 19                                                                                                                                                  | USP19   | Homo sapiens |
| 9099      | ubiquitin specific peptidase 2                                                                                                                                                   | USP2    | Homo sapiens |
| 10868     | ubiquitin specific peptidase 20                                                                                                                                                  | USP20   | Homo sapiens |

|        |                                                                                 |        |              |
|--------|---------------------------------------------------------------------------------|--------|--------------|
| 84669  | similar to TBC1 domain family, member 3; ubiquitin specific peptidase 32        | USP32  | Homo sapiens |
| 645822 | similar to TBC1 domain family, member 3; ubiquitin specific peptidase 32        | USP32  | Homo sapiens |
| 23032  | ubiquitin specific peptidase 33                                                 | USP33  | Homo sapiens |
| 9736   | ubiquitin specific peptidase 34                                                 | USP34  | Homo sapiens |
| 64854  | ubiquitin specific peptidase 46                                                 | USP46  | Homo sapiens |
| 8078   | ubiquitin specific peptidase 5 (isopeptidase T)                                 | USP5   | Homo sapiens |
| 9098   | ubiquitin specific peptidase 6 (Tre-2 oncogene)                                 | USP6   | Homo sapiens |
| 7874   | ubiquitin specific peptidase 7 (herpes virus-associated)                        | USP7   | Homo sapiens |
| 9101   | ubiquitin specific peptidase 8                                                  | USP8   | Homo sapiens |
| 8239   | ubiquitin specific peptidase 9, X-linked                                        | USP9X  | Homo sapiens |
| 10090  | uronyl-2-sulfotransferase                                                       | UST    | Homo sapiens |
| 7402   | utrophin                                                                        | UTRN   | Homo sapiens |
| 7404   | ubiquitously transcribed tetratricopeptide repeat gene, Y-linked                | UTY    | Homo sapiens |
| 7405   | UV radiation resistance associated gene                                         | UVRAG  | Homo sapiens |
| 6843   | vesicle-associated membrane protein 1 (synaptobrevin 1)                         | VAMP1  | Homo sapiens |
| 9341   | vesicle-associated membrane protein 3 (cellubrevin)                             | VAMP3  | Homo sapiens |
| 8674   | vesicle-associated membrane protein 4                                           | VAMP4  | Homo sapiens |
| 10791  | vesicle-associated membrane protein 5 (myobrevin)                               | VAMP5  | Homo sapiens |
| 8673   | vesicle-associated membrane protein 8 (endobrevin)                              | VAMP8  | Homo sapiens |
| 9218   | VAMP (vesicle-associated membrane protein)-associated protein A, 33kDa          | VAPA   | Homo sapiens |
| 9217   | VAMP (vesicle-associated membrane protein)-associated protein B and C           | VAPB   | Homo sapiens |
| 10493  | vesicle amine transport protein 1 homolog (T. californica)                      | VAT1   | Homo sapiens |
| 7409   | vav 1 guanine nucleotide exchange factor                                        | VAV1   | Homo sapiens |
| 7410   | vav 2 guanine nucleotide exchange factor                                        | VAV2   | Homo sapiens |
| 10451  | vav 3 guanine nucleotide exchange factor                                        | VAV3   | Homo sapiens |
| 7412   | vascular cell adhesion molecule 1                                               | VCAM1  | Homo sapiens |
| 7414   | vinculin                                                                        | VCL    | Homo sapiens |
| 642585 | voltage-dependent anion channel 1; similar to voltage-dependent anion channel 1 | VDAC1  | Homo sapiens |
| 7416   | voltage-dependent anion channel 1; similar to voltage-dependent anion channel 1 | VDAC1  | Homo sapiens |
| 7423   | vascular endothelial growth factor B                                            | VEGFB  | Homo sapiens |
| 51442  | vestigial like 1 (Drosophila)                                                   | VGLL1  | Homo sapiens |
| 9686   | vestigial like 4 (Drosophila)                                                   | VGLL4  | Homo sapiens |
| 7429   | villin 1                                                                        | VIL1   | Homo sapiens |
| 7431   | vimentin                                                                        | VIM    | Homo sapiens |
| 7432   | vasoactive intestinal peptide                                                   | VIP    | Homo sapiens |
| 7433   | vasoactive intestinal peptide receptor 1                                        | VIPR1  | Homo sapiens |
| 7434   | vasoactive intestinal peptide receptor 2                                        | VIPR2  | Homo sapiens |
| 8876   | vanin 1                                                                         | VNN1   | Homo sapiens |
| 55823  | vacuolar protein sorting 11 homolog (S. cerevisiae)                             | VPS11  | Homo sapiens |
| 23230  | vacuolar protein sorting 13 homolog A (S. cerevisiae)                           | VPS13A | Homo sapiens |
| 27072  | vacuolar protein sorting 41 homolog (S. cerevisiae)                             | VPS41  | Homo sapiens |

|        |                                                                         |        |              |
|--------|-------------------------------------------------------------------------|--------|--------------|
| 9525   | vacuolar protein sorting 4 homolog B ( <i>S. cerevisiae</i> )           | VPS4B  | Homo sapiens |
| 6293   | vacuolar protein sorting 52 homolog ( <i>S. cerevisiae</i> )            | VPS52  | Homo sapiens |
| 7443   | vaccinia related kinase 1                                               | VRK1   | Homo sapiens |
| 7444   | vaccinia related kinase 2                                               | VRK2   | Homo sapiens |
| 7447   | visinin-like 1                                                          | VSNL1  | Homo sapiens |
| 7450   | von Willebrand factor                                                   | VWF    | Homo sapiens |
| 7453   | tryptophanyl-tRNA synthetase                                            | WARS   | Homo sapiens |
| 7454   | Wiskott-Aldrich syndrome (eczema-thrombocytopenia)                      | WAS    | Homo sapiens |
| 8936   | WAS protein family, member 1                                            | WASF1  | Homo sapiens |
| 10810  | WAS protein family, member 3                                            | WASF3  | Homo sapiens |
| 8976   | Wiskott-Aldrich syndrome-like                                           | WASL   | Homo sapiens |
| 23558  | WW domain binding protein 2                                             | WBP2   | Homo sapiens |
| 11193  | WW domain binding protein 4 (formin binding protein 21)                 | WBP4   | Homo sapiens |
| 23001  | WD repeat and FYVE domain containing 3                                  | WDFY3  | Homo sapiens |
| 11169  | WD repeat and HMG-box DNA binding protein 1                             | WDHD1  | Homo sapiens |
| 57418  | WD repeat domain 18                                                     | WDR18  | Homo sapiens |
| 11152  | WD repeat domain 45                                                     | WDR45  | Homo sapiens |
| 58189  | WAP four-disulfide core domain 1                                        | WFDC1  | Homo sapiens |
| 7466   | Wolfram syndrome 1 (wolframin)                                          | WFS1   | Homo sapiens |
| 11197  | WNT inhibitory factor 1                                                 | WIF1   | Homo sapiens |
| 8840   | WNT1 inducible signaling pathway protein 1                              | WISP1  | Homo sapiens |
| 8839   | WNT1 inducible signaling pathway protein 2                              | WISP2  | Homo sapiens |
| 80326  | wingless-type MMTV integration site family, member 10A                  | WNT10A | Homo sapiens |
| 7480   | wingless-type MMTV integration site family, member 10B                  | WNT10B | Homo sapiens |
| 7481   | wingless-type MMTV integration site family, member 11                   | WNT11  | Homo sapiens |
| 51384  | wingless-type MMTV integration site family, member 16                   | WNT16  | Homo sapiens |
| 7472   | wingless-type MMTV integration site family member 2                     | WNT2   | Homo sapiens |
| 7473   | wingless-type MMTV integration site family, member 3                    | WNT3   | Homo sapiens |
| 54361  | wingless-type MMTV integration site family, member 4                    | WNT4   | Homo sapiens |
| 7475   | wingless-type MMTV integration site family, member 6                    | WNT6   | Homo sapiens |
| 7485   | tryptophan rich basic protein                                           | WRB    | Homo sapiens |
| 7486   | similar to Werner syndrome protein; Werner syndrome, RecQ helicase-like | WRN    | Homo sapiens |
| 652522 | similar to Werner syndrome protein; Werner syndrome, RecQ helicase-like | WRN    | Homo sapiens |
| 26118  | WD repeat and SOCS box-containing 1                                     | WSB1   | Homo sapiens |
| 7490   | Wilms tumor 1                                                           | WT1    | Homo sapiens |
| 9589   | Wilms tumor 1 associated protein                                        | WTAP   | Homo sapiens |
| 51741  | WW domain containing oxidoreductase                                     | WWOX   | Homo sapiens |
| 11059  | WW domain containing E3 ubiquitin protein ligase 1                      | WWP1   | Homo sapiens |
| 11060  | WW domain containing E3 ubiquitin protein ligase 2                      | WWP2   | Homo sapiens |
| 7494   | X-box binding protein 1                                                 | XBP1   | Homo sapiens |
| 6375   | chemokine (C motif) ligand 1                                            | XCL1   | Homo sapiens |
| 2829   | chemokine (C motif) receptor 1                                          | XCR1   | Homo sapiens |
| 7504   | X-linked Kx blood group (McLeod syndrome)                               | XK     | Homo sapiens |
| 7507   | xeroderma pigmentosum, complementation group A                          | XPA    | Homo sapiens |

|        |                                                                                                                                                                                                      |         |              |
|--------|------------------------------------------------------------------------------------------------------------------------------------------------------------------------------------------------------|---------|--------------|
| 7508   | xeroderma pigmentosum, complementation group C                                                                                                                                                       | XPC     | Homo sapiens |
| 7511   | X-prolyl aminopeptidase (aminopeptidase P) 1, soluble                                                                                                                                                | XPNPEP1 | Homo sapiens |
| 7514   | exportin 1 (CRM1 homolog, yeast)                                                                                                                                                                     | XPO1    | Homo sapiens |
| 57510  | exportin 5                                                                                                                                                                                           | XPO5    | Homo sapiens |
| 7515   | X-ray repair complementing defective repair in Chinese hamster cells 1                                                                                                                               | XRCC1   | Homo sapiens |
| 7518   | X-ray repair complementing defective repair in Chinese hamster cells 4                                                                                                                               | XRCC4   | Homo sapiens |
| 7520   | X-ray repair complementing defective repair in Chinese hamster cells 5 (double-strand-break rejoining)                                                                                               | XRCC5   | Homo sapiens |
| 54464  | 5'-3' exoribonuclease 1                                                                                                                                                                              | XRN1    | Homo sapiens |
| 22803  | 5'-3' exoribonuclease 2                                                                                                                                                                              | XRN2    | Homo sapiens |
| 64131  | xylosyltransferase I                                                                                                                                                                                 | XYLT1   | Homo sapiens |
| 10138  | YY1 associated factor 2                                                                                                                                                                              | YAF2    | Homo sapiens |
| 10413  | Yes-associated protein 1, 65kDa                                                                                                                                                                      | YAP1    | Homo sapiens |
| 8565   | tyrosyl-tRNA synthetase                                                                                                                                                                              | YARS    | Homo sapiens |
| 55689  | YEATS domain containing 2                                                                                                                                                                            | YEATS2  | Homo sapiens |
| 7525   | v-yes-1 Yamaguchi sarcoma viral oncogene homolog 1                                                                                                                                                   | YES1    | Homo sapiens |
| 7529   | tyrosine 3-monooxygenase/tryptophan 5-monooxygenase activation protein, beta polypeptide                                                                                                             | YWHAB   | Homo sapiens |
| 440917 | similar to 14-3-3 protein epsilon (14-3-3E) (Mitochondrial import stimulation factor L subunit) (MSF L); tyrosine 3-monooxygenase/tryptophan 5-monooxygenase activation protein, epsilon polypeptide | YWHAE   | Homo sapiens |
| 7531   | similar to 14-3-3 protein epsilon (14-3-3E) (Mitochondrial import stimulation factor L subunit) (MSF L); tyrosine 3-monooxygenase/tryptophan 5-monooxygenase activation protein, epsilon polypeptide | YWHAE   | Homo sapiens |
| 7533   | tyrosine 3-monooxygenase/tryptophan 5-monooxygenase activation protein, eta polypeptide                                                                                                              | YWHAH   | Homo sapiens |
| 10971  | tyrosine 3-monooxygenase/tryptophan 5-monooxygenase activation protein, theta polypeptide                                                                                                            | YWHAQ   | Homo sapiens |
| 7534   | tyrosine 3-monooxygenase/tryptophan 5-monooxygenase activation protein, zeta polypeptide                                                                                                             | YWHAZ   | Homo sapiens |
| 7528   | YY1 transcription factor                                                                                                                                                                             | YY1     | Homo sapiens |
| 9889   | zinc finger, BED-type containing 4                                                                                                                                                                   | ZBED4   | Homo sapiens |
| 27107  | zinc finger and BTB domain containing 11                                                                                                                                                             | ZBTB11  | Homo sapiens |
| 7704   | zinc finger and BTB domain containing 16                                                                                                                                                             | ZBTB16  | Homo sapiens |
| 7709   | zinc finger and BTB domain containing 17                                                                                                                                                             | ZBTB17  | Homo sapiens |
| 10009  | zinc finger and BTB domain containing 33                                                                                                                                                             | ZBTB33  | Homo sapiens |
| 7541   | zinc finger protein 161 homolog (mouse)                                                                                                                                                              | ZFP161  | Homo sapiens |
| 7538   | zinc finger protein 36, C3H type, homolog (mouse)                                                                                                                                                    | ZFP36   | Homo sapiens |
| 7539   | zinc finger protein 37 homolog (mouse)                                                                                                                                                               | ZFP37   | Homo sapiens |
| 7542   | zinc finger protein-like 1                                                                                                                                                                           | ZFPL1   | Homo sapiens |
| 9372   | zinc finger, FYVE domain containing 9                                                                                                                                                                | ZFYVE9  | Homo sapiens |
| 7545   | Zic family member 1 (odd-paired homolog, Drosophila)                                                                                                                                                 | ZIC1    | Homo sapiens |
| 51364  | zinc finger, MYND-type containing 10                                                                                                                                                                 | ZMYND10 | Homo sapiens |
| 10771  | zinc finger, MYND domain containing 11                                                                                                                                                               | ZMYND11 | Homo sapiens |
| 7692   | zinc finger protein 133                                                                                                                                                                              | ZNF133  | Homo sapiens |



|        |                                                    |        |              |
|--------|----------------------------------------------------|--------|--------------|
| 7694   | zinc finger protein 135                            | ZNF135 | Homo sapiens |
| 7696   | zinc finger protein 137                            | ZNF137 | Homo sapiens |
| 7701   | zinc finger protein 142                            | ZNF142 | Homo sapiens |
| 7705   | zinc finger protein 146                            | ZNF146 | Homo sapiens |
| 7707   | zinc finger protein 148                            | ZNF148 | Homo sapiens |
| 7718   | zinc finger protein 165                            | ZNF165 | Homo sapiens |
| 7727   | zinc finger protein 174                            | ZNF174 | Homo sapiens |
| 7738   | zinc finger protein 184                            | ZNF184 | Homo sapiens |
| 7741   | zinc finger protein 187                            | ZNF187 | Homo sapiens |
| 7746   | zinc finger protein 193                            | ZNF193 | Homo sapiens |
| 10168  | zinc finger protein 197                            | ZNF197 | Homo sapiens |
| 7752   | zinc finger protein 200                            | ZNF200 | Homo sapiens |
| 10520  | zinc finger protein 211                            | ZNF211 | Homo sapiens |
| 7764   | zinc finger protein 217                            | ZNF217 | Homo sapiens |
| 7570   | zinc finger protein 22 (KOX 15)                    | ZNF22  | Homo sapiens |
| 7773   | zinc finger protein 230                            | ZNF230 | Homo sapiens |
| 10472  | zinc finger protein 238                            | ZNF238 | Homo sapiens |
| 7572   | zinc finger protein 24                             | ZNF24  | Homo sapiens |
| 10127  | zinc finger protein 263                            | ZNF263 | Homo sapiens |
| 9422   | zinc finger protein 264                            | ZNF264 | Homo sapiens |
| 10781  | zinc finger protein 266                            | ZNF266 | Homo sapiens |
| 10782  | zinc finger protein 274                            | ZNF274 | Homo sapiens |
| 23528  | zinc finger protein 281                            | ZNF281 | Homo sapiens |
| 7551   | zinc finger protein 3                              | ZNF3   | Homo sapiens |
| 24149  | zinc finger protein 318                            | ZNF318 | Homo sapiens |
| 7580   | zinc finger protein 32                             | ZNF32  | Homo sapiens |
| 25799  | zinc finger protein 324                            | ZNF324 | Homo sapiens |
| 27309  | zinc finger protein 330                            | ZNF330 | Homo sapiens |
| 59348  | zinc finger protein 350                            | ZNF350 | Homo sapiens |
| 57862  | zinc finger protein 410                            | ZNF410 | Homo sapiens |
| 23090  | zinc finger protein 423                            | ZNF423 | Homo sapiens |
| 51710  | zinc finger protein 44                             | ZNF44  | Homo sapiens |
| 26036  | zinc finger protein 451                            | ZNF451 | Homo sapiens |
| 58499  | zinc finger protein 462                            | ZNF462 | Homo sapiens |
| 256051 | zinc finger protein 549                            | ZNF549 | Homo sapiens |
| 27332  | zinc finger protein 638                            | ZNF638 | Homo sapiens |
| 7553   | zinc finger protein 7                              | ZNF7   | Homo sapiens |
| 7629   | zinc finger protein 76 (expressed in testis)       | ZNF76  | Homo sapiens |
| 7633   | zinc finger protein 79                             | ZNF79  | Homo sapiens |
| 7554   | zinc finger protein 8                              | ZNF8   | Homo sapiens |
| 11055  | zona pellucida binding protein                     | ZPBP   | Homo sapiens |
| 9183   | ZW10, kinetochore associated, homolog (Drosophila) | ZW10   | Homo sapiens |
| 7791   | zyxin                                              | ZYX    | Homo sapiens |
| 26009  | zinc finger, ZZ-type containing 3                  | ZZZ3   | Homo sapiens |
